# Supplementary material for: Substrate NOBINAc ligand affinity for Pd II -catalyzed enantioselective C–H activation over reactive β-C–H bonds in ferrocenyl amines
Source: Royal Society of Chemistry journal article supplement (doi:10.1039/d4sc06867j), 2024-12-13
Supplement: d4sc06867j1.pdf [file d4sc06867j1.pdf]

*Supporting Information*

**Substrate NOBINAc Ligand Affinity for Pd<sup>II</sup>-Catalyzed Enantioselective C-H Activation over Reactive β-C-H Bond in Ferrocenyl Amines**

Devendra Parganiha, Raviraj Ananda Thorat, Ashwini Dilip Dhumale, Yagya Dutt Upadhyay, Raushan Kumar Jha, Sarvanan Raju and Sangit Kumar\*

Department of Chemistry, Indian Institute of Science Education and Research Bhopal, Bhopal Bypass Road, Bhauri, Bhopal, Madhya Pradesh 462 066, India.

E-mail: [sangitkumar@iiserb.ac.in](mailto:sangitkumar@iiserb.ac.in)

| <b>Sr. No.</b> | <b>Contents</b>                                                                               | <b>Page No.</b> |
|----------------|-----------------------------------------------------------------------------------------------|-----------------|
| 1              | General experimental details                                                                  | 2-3             |
| 2              | General procedure for the synthesis of starting materials                                     | 4-10            |
| 3              | Reaction optimization                                                                         | 11-16           |
| 4              | Synthesis of ferrocene fused tetrahydropyridines and HPLC traces                              | 17-98           |
| 5              | Mechanistic investigation                                                                     | 99-101          |
| 6              | The details of DFT computation                                                                | 102-120         |
| 7              | X-ray single-crystal data of compounds ( <i>Rp</i> )- <b>3a</b> and ( <i>Sp</i> )- <b>3a</b>  | 121-156         |
| 8              | <sup>1</sup> H, <sup>13</sup> C, and <sup>19</sup> F Spectra of isolated ferrocenyl compounds | 157-269         |
| 9              | References                                                                                    | 270             |

## General Experimental Details

Starting materials were prepared under an inert atmosphere (N<sub>2</sub>, Ar) and Pd-Catalyzed ferrocene fused tetrahydropyridines were prepared under dry air. Primary analyses were carried out using thin-layer chromatography (TLC) with silica-coated plates. Reagents were procured from commercial sources, including Sigma Aldrich, Alfa Aesar, BLD Pharma, and Spectrochem. The Solvents were meticulously dried by following standard procedures. Nuclear Magnetic Resonance (NMR) spectral data were collected using Bruker 400, 500, and 700 MHz spectrometers, with chemical shift values reported in parts per million (ppm) relative to CDCl<sub>3</sub> as an internal standard (7.26 ppm for <sup>1</sup>H, 77.16 ppm for <sup>13</sup>C). Multiplicity was denoted using the following abbreviations: s (singlet), d (doublet), t (triplet), q (quartet), dd (doublet of doublet), td (triplet of doublet), and m (multiplet). High-resolution mass spectrometric (HRMS) analyses were performed using a quadrupole time-of-flight mass spectrometry (Q-TOF-MS) instrument with an electrospray ionization (ESI) technique. Chiral analysis was carried out using high-performance liquid chromatography (HPLC) equipment from Agilent Technologies, employing CHIRALCELL OZ-3, AD-H, IC-3, and AD-3 chiral HPLC columns. The weighing balance utilized was from Sartorius (model BSA224S-CW). Single crystal X-ray data were collected using a Bruker APEX-II CCD diffractometer equipped with a CMOS Photon 100 detector. Crystal structures were refined using the Olex2 and WinGX Program System package with the SHELXL-2019/2 program. Starting material allenes and amines were freshly prepared by following a reported procedure with slight modifications, while ferrocene carboxaldehyde was directly purchased from BLD Pharm India and used without further purification. Aminoacids, *S*-BINOL, and *R*-BINOL were directly purchased from commercial sources and further modified using the reported procedure. DFT calculations were performed using the Gaussian 16 package to identify suitable intermediates and transition states along the reaction pathway.

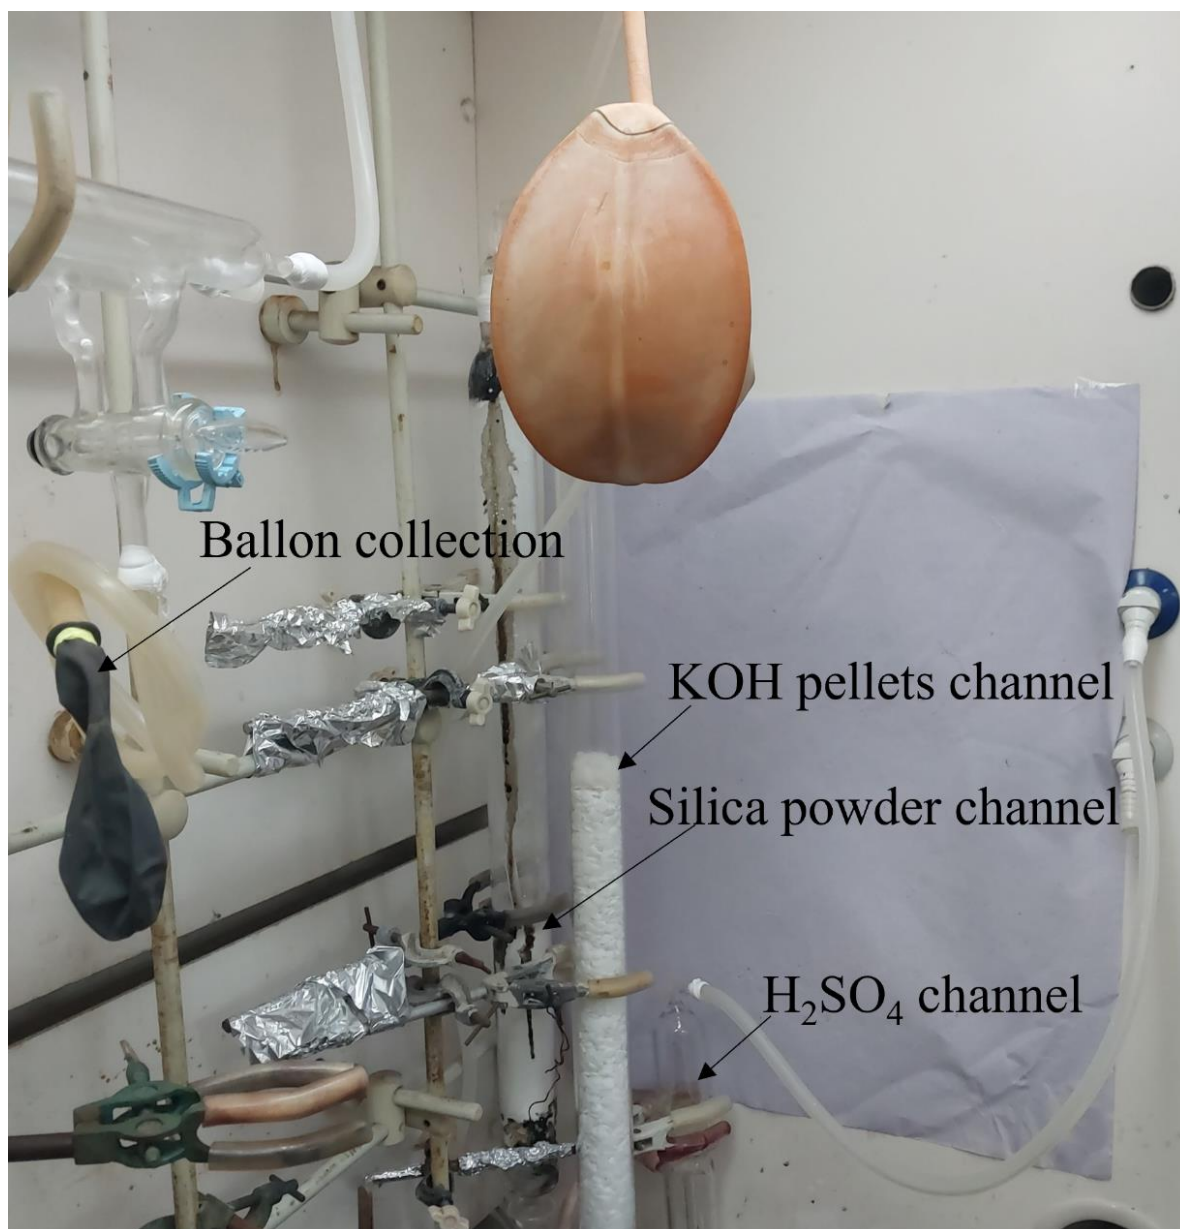

**Figure S1.** Setup for Dry Air used for Enantioselective CH Activation of Ferrocenyl Amines

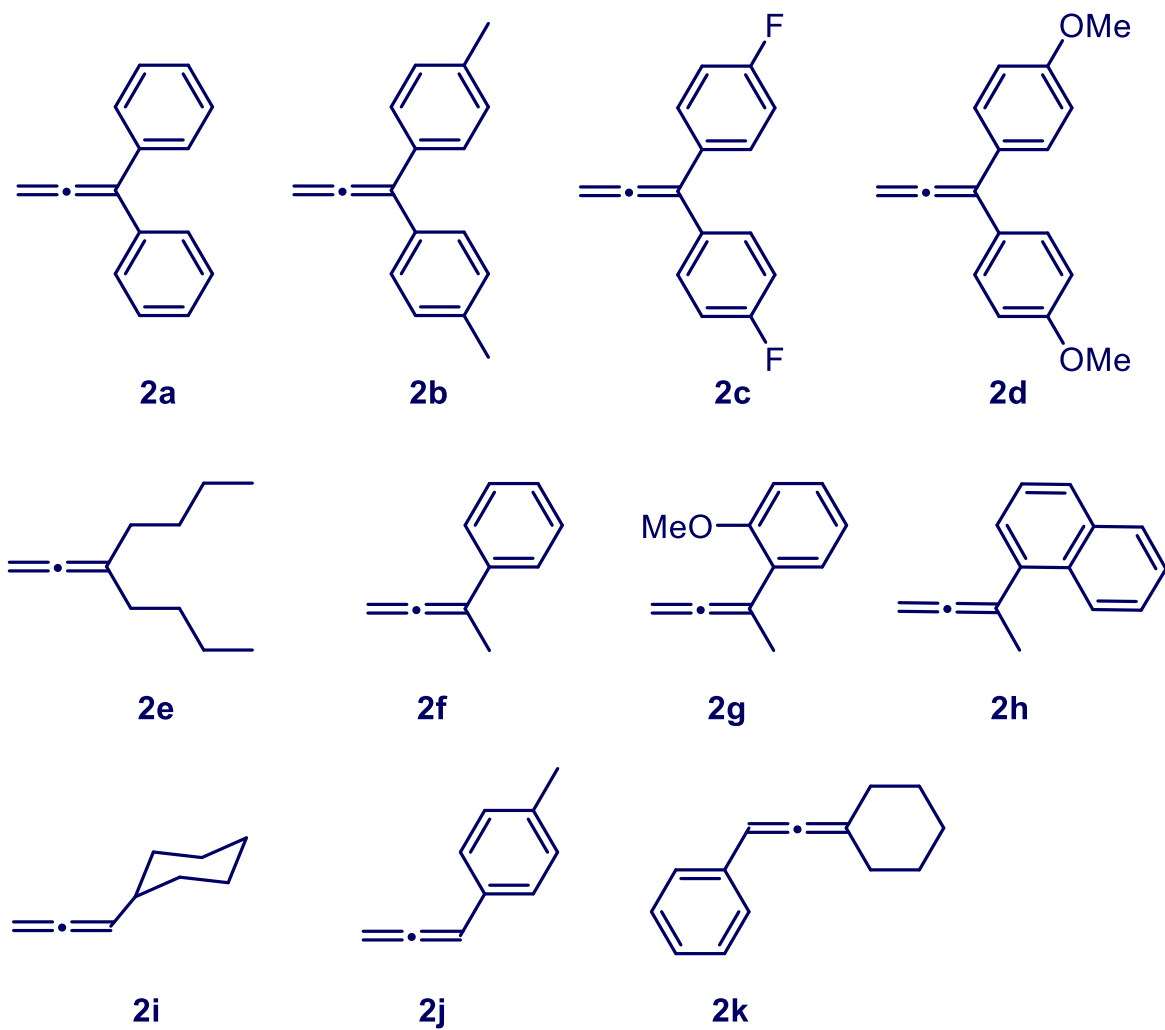

**Figure S2.** Allenes **2a-2k** was used for the enantioselective annulation reaction. Allenes **2a-2k** were synthesized according to the previously reported literature procedure,<sup>1</sup> and **2i** were purchased from a commercially available source.



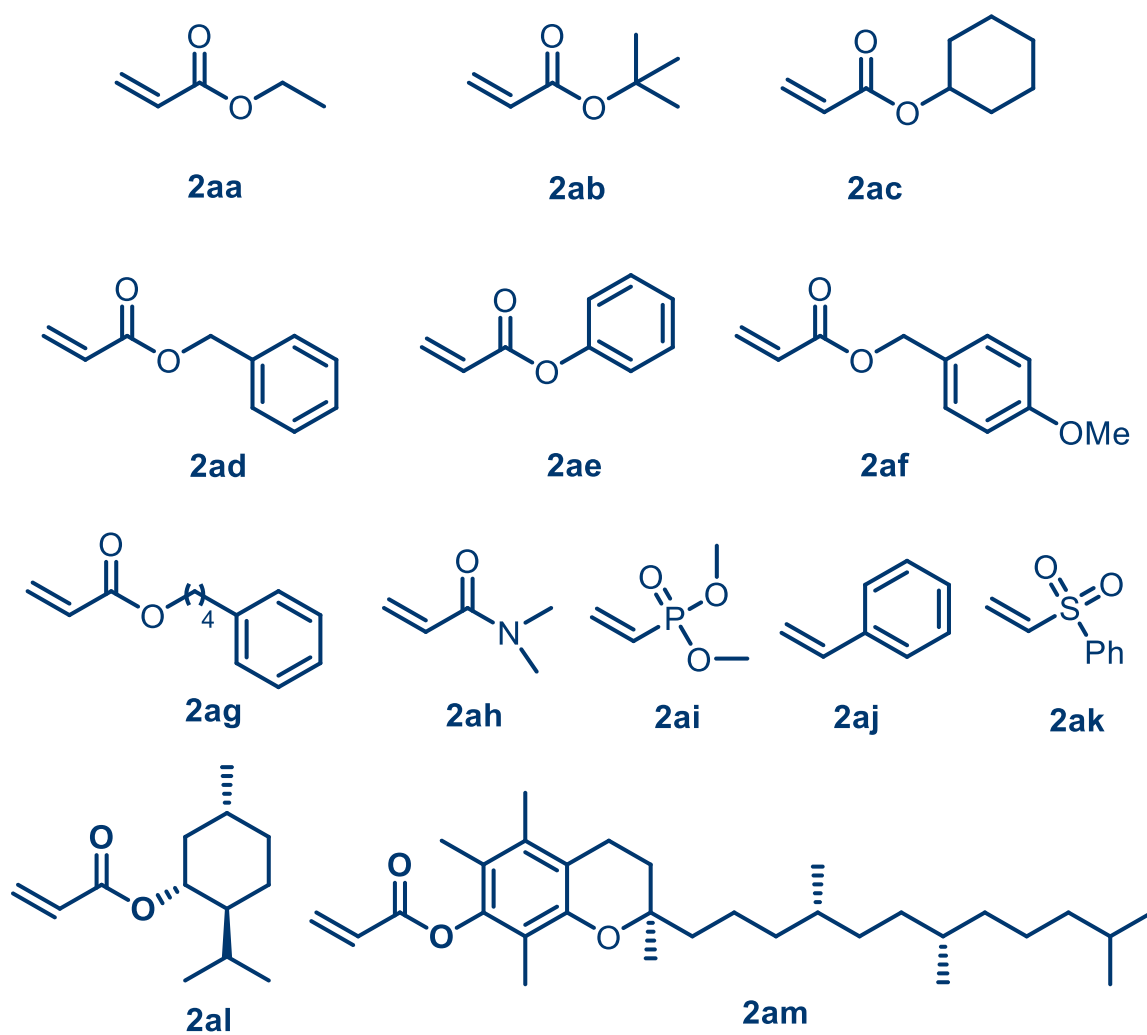

**Figure S3.** Alkenes **2aa-2al** are used for the enantioselective alkenylation reaction. Alkenes **2aa-2am** were synthesized according to the previously reported literature procedure,<sup>2</sup> and **2ah-2ak** were purchased from a commercially available source.

**Scheme S1.** General procedure for synthesizing *N*-ferrocenyl sulfonamides **1a-1f**

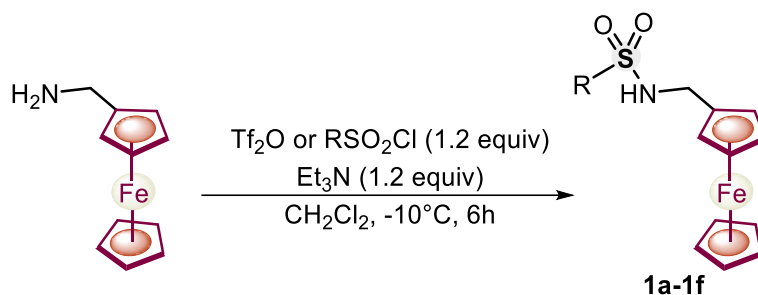

Ferrocenyl methyl amine was synthesized according to the reported literature procedure,<sup>3</sup> and used further without any purification for the synthesis of *N*-ferrocenyl sulfonamides **1a-1f**. To a solution of ferrocenyl methyl amine (2.0 mL, 9.3 mmol, 1 equiv) in dichloromethane (31 mL, 0.3 M) under argon atmosphere, triethylamine (1.4 mL, 11.2 mmol, 1.2 equiv) was added at -10 °C. After that, the solution was stirred for 5 minutes at -10 °C, and trifluoromethanesulfonic anhydride (1.8 mL, 11.2 mmol, 1.2 equiv) was added dropwise to the solution. The reaction was allowed to be stirred for 6 h before being quenched with water. The organic layer was separated, and the aqueous layer was extracted with dichloromethane (25 mL x 3). The combined organic phase was washed with brine and then dried over Na<sub>2</sub>SO<sub>4</sub>. Evaporation of the solvent on a rotary evaporator under vacuum and column chromatography on silica gel (100-200 mesh) using hexanes: ethyl acetate 80:20 eluent afforded *N*-methyl ferrocenyl 1,1,1-trifluoromethanesulfonamide **1a**.

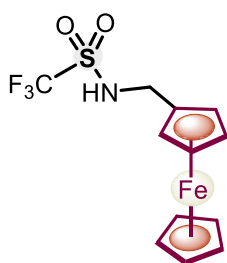

***N*-Methylferrocenyl 1,1,1-trifluoromethanesulfonamide 1a.** Orange-yellow solid, mp: 67-69 °C. Yield: 1.60 g (52%). <sup>1</sup>H NMR (400 MHz, CDCl<sub>3</sub>) δ 5.06 (s, 1H), 4.25 (brs, 4H), 4.22 (s, 5H), 4.19 (s, 2H). <sup>13</sup>C{<sup>1</sup>H} NMR (101 MHz, CDCl<sub>3</sub>) δ 119.7 (d, *J* = 321.2 Hz, C), 82.4 (C),

69.0 (CH), 68.9 (CH), 68.4 (CH), 44.0 (CH<sub>2</sub>). <sup>19</sup>F NMR (471 MHz, CDCl<sub>3</sub>) δ -75.38. HRLCMS [APCI] *m/z*: [M-H]<sup>+</sup> Calcd for C<sub>12</sub>H<sub>11</sub>F<sub>3</sub>FeNO<sub>2</sub>S 345.9799; Found 345.9807

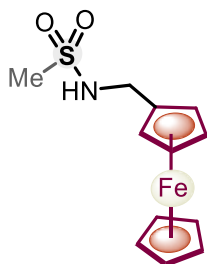

**N-Methylferrocenyl methanesulfonamide 1b.** Yellow solid, mp: 82-84 °C. Yield: 1.96 g (72%). <sup>1</sup>H NMR (400 MHz, CDCl<sub>3</sub>) δ 4.48 (s, 1H), 4.32 (brs, 2H), 4.26 (brs, 7H), 4.03 (brs, 2H), 2.89 (s, 3H). <sup>13</sup>C{<sup>1</sup>H} NMR (101 MHz, CDCl<sub>3</sub>) δ 84.3 (C), 69.3 (CH), 69.0, (CH), 68.9, (CH), 42.9 (CH<sub>2</sub>), 41.1 (CH<sub>3</sub>). HRLCMS [ESI] *m/z*: [M] Calcd for C<sub>12</sub>H<sub>15</sub>FeNO<sub>2</sub>S 293.0167; Found 293.0149.

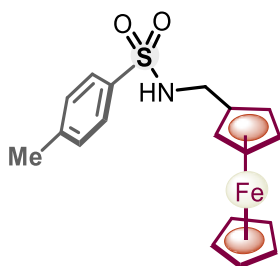

**N-Methylferrocenyl 4-methylbenzenesulfonamide 1c.** Yellow solid, mp: 89-90 °C. Yield: 2.20 g (65%). <sup>1</sup>H NMR (400 MHz, CDCl<sub>3</sub>) δ 7.80 (d, *J* = 8.0 Hz, 2H), 7.35 (d, *J* = 8.0 Hz, 2H), 4.56 (brs, 1H), 4.16 (brs, 7H), 4.10 (brs, 2H), 3.83 (d, *J* = 5.2 Hz, 2H), 2.47 (s, 3H). <sup>13</sup>C{<sup>1</sup>H} NMR (176 MHz, CDCl<sub>3</sub>) δ 143.5 (C), 136.9 (C), 129.8 (CH), 127.2 (CH), 84.2 (C), 69.2 (CH), 68.8 (CH), 68.5 (CH), 42.6 (CH<sub>2</sub>), 21.6 (CH<sub>3</sub>). HRLCMS [ESI] *m/z*: [M] Calcd for C<sub>18</sub>H<sub>19</sub>FeNO<sub>2</sub>S 369.0481; Found 369.0480.

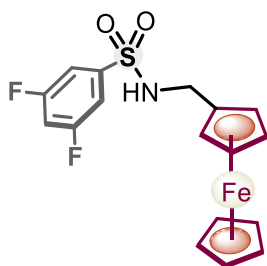

***N*-Methylferrocenyl 3,5-difluorobenzenesulfonamide 1d.** Orange solid, mp: 97-98 °C.

Yield: 2.10 g (59%). <sup>1</sup>H NMR (400 MHz, CDCl<sub>3</sub>) δ 7.47 – 7.38 (m, 2H), 7.02 – 7.08 (m, *J* = 8.5, 2.3 Hz, 1H), 4.70 (s, 1H), 4.18 (s, 5H), 4.16 (s, 2H), 4.10 (s, 2H), 3.94 (d, *J* = 5.6 Hz, 2H). <sup>13</sup>C{<sup>1</sup>H} NMR (176 MHz, CDCl<sub>3</sub>) δ 162.83 (dd, *J* = 254.7 Hz, C), 143.5 (t, *J* = 8.2 Hz, C), 110.6 (dd, *J* = 22.4, Hz, CH), 108.2 (t, *J* = 25.1 Hz, CH), 82.9 (C), 68.8 (CH), 68.6 (CH), 68.2 (CH), 42.9 (CH<sub>2</sub>). <sup>19</sup>F NMR (471 MHz, CDCl<sub>3</sub>) δ -105.57. HRLCMS [ESI] *m/z*: [M] Calcd for C<sub>17</sub>H<sub>15</sub>FeF<sub>2</sub>NO<sub>2</sub>S 391.0141; Found 391.0138.

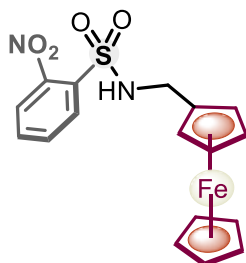

***N*-Methylferrocenyl 2-nitrobenzenesulfonamide 1e.** Yellow solid, mp: 102 °C-103°C.

Yield: 2.40 g (67%). <sup>1</sup>H NMR (400 MHz, CDCl<sub>3</sub>) δ 8.20 – 8.11 (m, 1H), 7.92 – 7.84 (m, 1H), 7.79 – 7.71 (m, 2H), 5.62 (t, *J* = 5.5 Hz, 1H), 4.18 (s, 5H), 4.08 (d, *J* = 2.6 Hz, 4H), 4.04 (d, *J* = 5.8 Hz, 2H). <sup>13</sup>C{<sup>1</sup>H} NMR (126 MHz, CDCl<sub>3</sub>) δ 147.9 (C), 133.9 (C), 133.6 (CH), 132.9 (CH), 131.1 (CH), 125.4 (CH), 83.0 (C), 68.6 (CH), 68.3 (CH), 67.8 (CH), 43.4 (CH<sub>2</sub>). HRLCMS [ESI] *m/z*: [M] Calcd for C<sub>17</sub>H<sub>16</sub>FeN<sub>2</sub>O<sub>4</sub>S 400.0175; Found 400.0174.

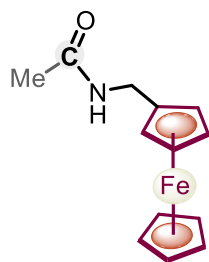

**N-Methylferrocenyl acetamide 1f.** Yellow solid, mp: 85 °C-86 °C. Yield: 1.7 g (72%).  $^1\text{H}$  NMR (400 MHz,  $\text{CDCl}_3$ )  $\delta$  5.68 (brs, 1H), 4.20 (d,  $J = 1.6$  Hz, 2H), 4.18 (s, 5H), 4.15 (d,  $J = 4.8$  Hz, 4H), 1.99 (s, 3H).  $^{13}\text{C}\{^1\text{H}\}$  NMR (101 MHz,  $\text{CDCl}_3$ )  $\delta$  169.4 (C), 84.6 (C), 68.7 (CH), 68.5 (CH), 68.3 (CH), 68.2 (CH), 39.0 ( $\text{CH}_2$ ), 23.2 ( $\text{CH}_3$ ). HRLCMS [ESI]  $m/z$ : [M] Calcd for  $\text{C}_{13}\text{H}_{15}\text{FeNO}$  257.0503; Found 257.0497.

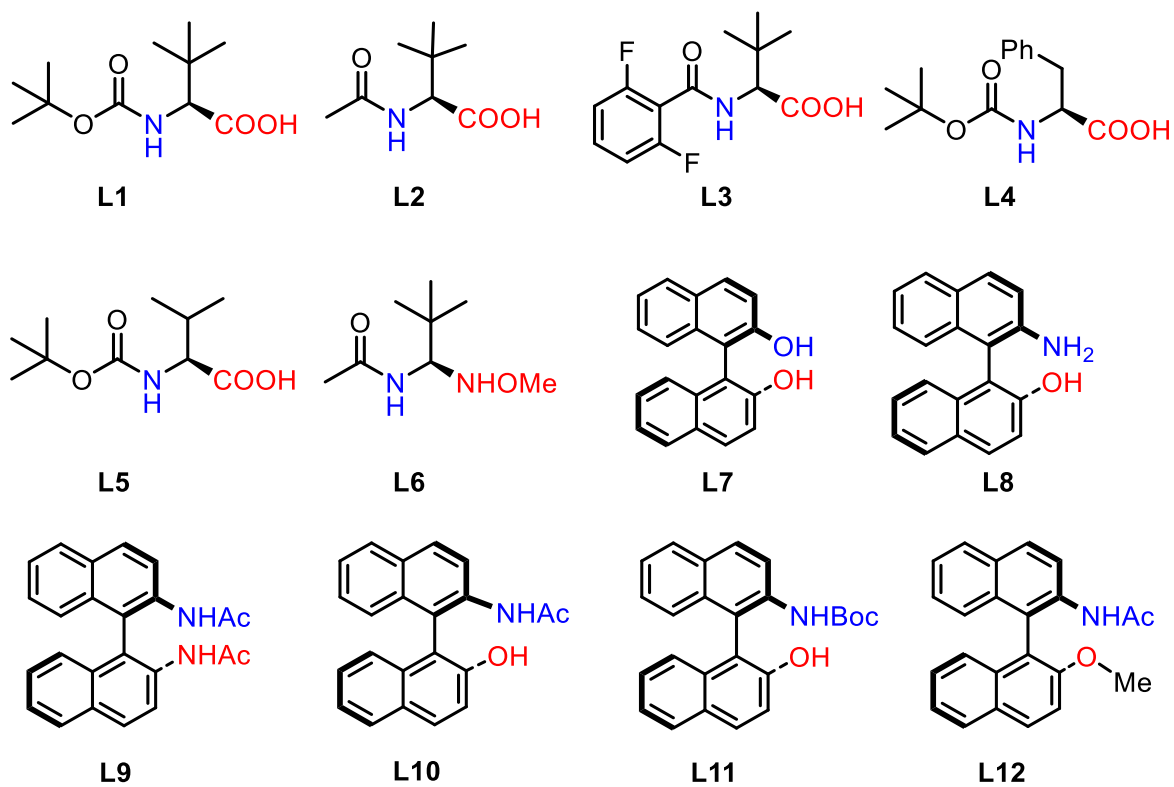

**Figure S4.** Ligands **L1**, **L2**, and **L7** are commercially available and ligands **L3-L6** and **L8-L12** were synthesized according to the reported literature procedure.<sup>4</sup>

## Reaction Optimization

**Table S1.** Solvent Screening<sup>a</sup>

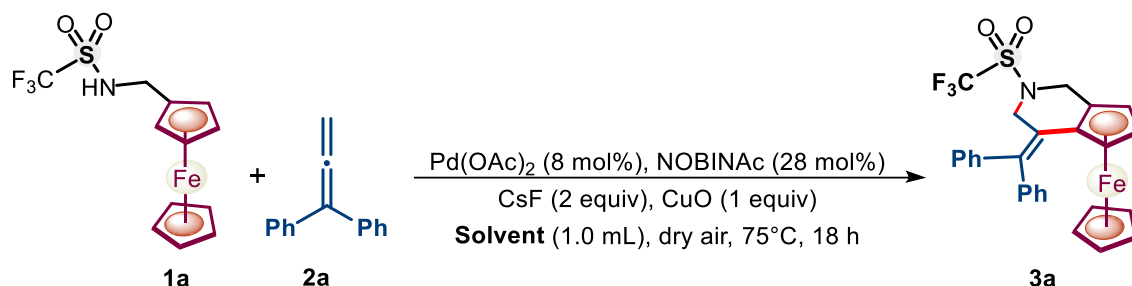

| S. No. | Solvent                                | Yield of <b>3a</b> <sup>b</sup> | ee of <b>3a</b> <sup>c</sup> |
|--------|----------------------------------------|---------------------------------|------------------------------|
| 1      | <i>t</i> -amyl alcohol                 | 6%                              | 17%                          |
| 2      | toluene                                | 25%                             | 60%                          |
| 3      | DMSO                                   | 18%                             | 41%                          |
| 4      | DMAc                                   | 42%                             | 32%                          |
| 5      | Toluene + <i>t</i> -amyl alcohol (5:1) | 21%                             | 35%                          |
| 6      | Toluene + DMSO (5:1)                   | 28%                             | 62%                          |
| 7      | Toluene + DMAc (5:1)                   | 53%                             | 40%                          |
| 8      | Toluene + DMAc (15:1)                  | 37%                             | 76%                          |
| 9      | Toluene (1ml) + DMAc (15 equiv)        | 39%                             | 85%                          |
| 10     | THF                                    | 70%                             | 98%                          |

<sup>a</sup> Reaction conditions: **1a** (0.11 mmol, 1 equiv), **2a** (0.22 mmol, 2 equiv), Pd(OAc)<sub>2</sub> (8 mol %), NOBINAc (28 mol %), CsF (0.22 mmol, 2 equiv), CuO (0.11 mmol, 1 equiv) in 1.0 mL solvent under dry air 18h at 75 °C. <sup>b</sup> Yield of **3a** determined by <sup>1</sup>H NMR with CH<sub>2</sub>Br<sub>2</sub> as an internal standard. <sup>c</sup> enantioselectivity of **3a** was determined by HPLC analysis.

**Table S2.** Temperature Optimization <sup>a</sup>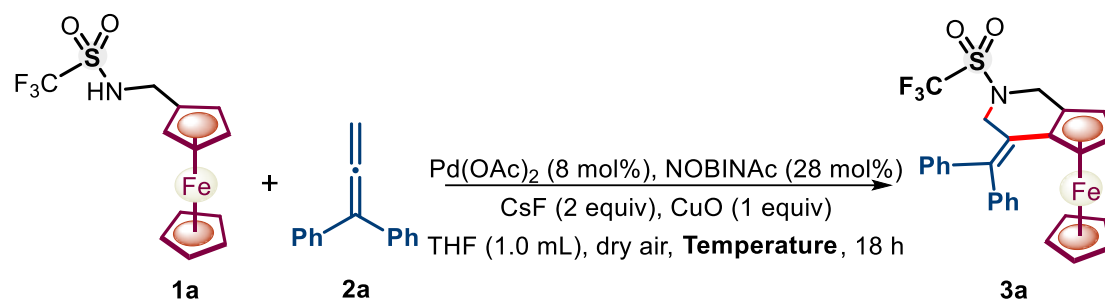

| S. No. | Temperature | Yield of <b>3a</b> <sup>b</sup> | ee of <b>3a</b> <sup>c</sup> |
|--------|-------------|---------------------------------|------------------------------|
| 1      | 65°C        | 62%                             | 98%                          |
| 2      | 80°C        | 71%                             | 97%                          |
| 3      | 100°C       | 65%                             | 86%                          |
| 4      | 40°C        | 32%                             | 98%                          |

<sup>a</sup> Reaction conditions: **1a** (0.11 mmol, 1 equiv), **2a** (0.22 mmol, 2 equiv), Pd(OAc)<sub>2</sub> (8 mol %), NOBINAc (28 mol %), CsF (0.22 mmol, 2 equiv), CuO (0.11 mmol, 1 equiv) in 1.0 mL THF under dry air atmosphere 18h at T °C. <sup>b</sup> Crude yield of **3a** determined by <sup>1</sup>H NMR with CH<sub>2</sub>Br<sub>2</sub> as an internal standard. <sup>c</sup> enantioselectivity of **3a** was determined by HPLC analysis.



**Table S3.** Variation in the Stoichiometry of Cs<sup>+</sup> Cation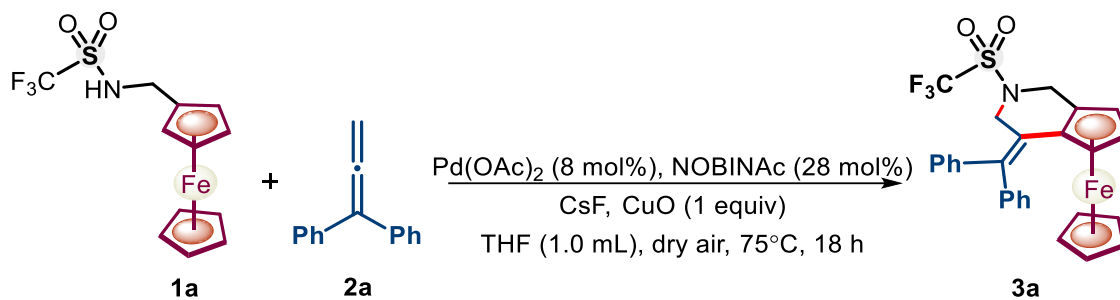

| S. No. | Cation (equiv) | Yield of <b>3a</b> <sup>b</sup> | ee of <b>3a</b> <sup>c</sup> |
|--------|----------------|---------------------------------|------------------------------|
| 1      | 0.5 equiv      | 34%                             | 70%                          |
| 2      | 1 equiv        | 48%                             | 85%                          |
| 3      | 1.5 equiv      | 57%                             | 93%                          |
| 4      | 2 equiv        | 70%                             | 98%                          |

<sup>a</sup> Reaction conditions: **1a** (0.11 mmol, 1 equiv), **2a** (0.22 mmol, 2 equiv), Pd(OAc)<sub>2</sub> (8 mol %), NOBINAc (28 mol %), CsF (xx equiv), CuO (0.11 mmol, 1 equiv) in 1.0 mL THF at 75 °C under dry air 18h. <sup>b</sup> Crude yield of **3a** determined by <sup>1</sup>H NMR with CH<sub>2</sub>Br<sub>2</sub> as an internal standard. <sup>c</sup> enantioselectivity of **3a** was determined by HPLC analysis.

**Table S4.** Optimization for Source of Cation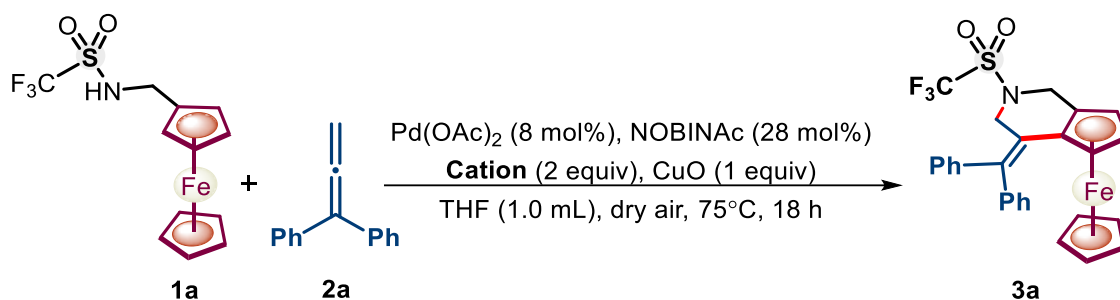

| S. No. | Cation source                   | Yield of <b>3a</b> <sup>b</sup> | ee of <b>3a</b> <sup>c</sup> |
|--------|---------------------------------|---------------------------------|------------------------------|
| 1      | Cs <sub>2</sub> CO <sub>3</sub> | 40%                             | 93%                          |
| 2      | K <sub>2</sub> CO <sub>3</sub>  | 35%                             | 87%                          |
| 3      | Na <sub>2</sub> CO <sub>3</sub> | 23%                             | 55%                          |
| 4      | Li <sub>2</sub> CO <sub>3</sub> | 12%                             | 10%                          |
| 5      | KOAc                            | 28%                             | 45%                          |
| 6      | CsOAc                           | 30%                             | 52%                          |
| 7      | NaOAc                           | 18%                             | 20%                          |
| 8      | KF                              | 48%                             | 89%                          |
| 9      | CsF                             | 70%                             | 98%                          |
| 10     | NEt <sub>3</sub>                | 5%                              | 0%                           |

<sup>a</sup> Reaction conditions: **1a** (0.11 mmol, 1 equiv), **2a** (0.22 mmol, 2 equiv), Pd(OAc)<sub>2</sub> (8 mol %), NOBINAc (28 mol %), Cation source (0.22 mmol, 2 equiv), CuO (0.11 mmol, 1 equiv) in 1.0 mL THF at 75 °C under dry air 18h. <sup>b</sup> Crude yield of **3a** determined by <sup>1</sup>H NMR with CH<sub>2</sub>Br<sub>2</sub> as an internal standard. <sup>c</sup> Enantioselectivity of **3a** was determined by HPLC analysis.

**Table S5.** Oxidant Screening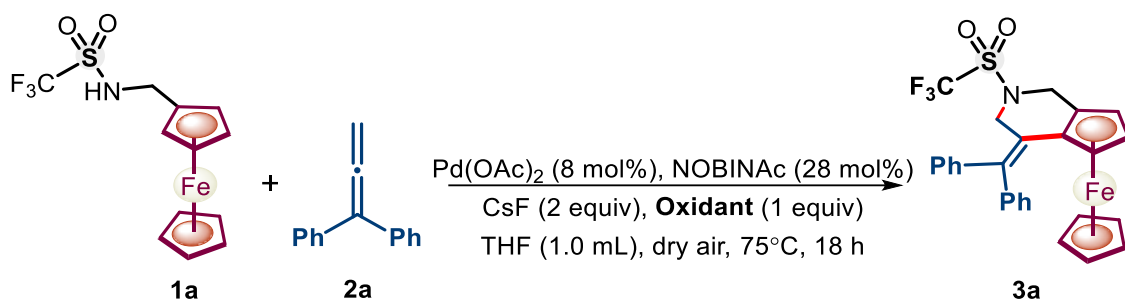

| S. No. | Oxidant                         | Yield of <b>3a</b> <sup>b</sup> | ee of <b>3a</b> <sup>c</sup> |
|--------|---------------------------------|---------------------------------|------------------------------|
| 1      | Air                             | 52%                             | 80%                          |
| 2      | O <sub>2</sub>                  | 32%                             | 86%                          |
| 3      | Ag <sub>2</sub> CO <sub>3</sub> | 26%                             | 75%                          |
| 4      | AgOAc                           | 42%                             | 52%                          |
| 5      | Cu(OAc) <sub>2</sub>            | 50%                             | 82%                          |
| 6      | CuO (1 equiv)                   | 70%                             | 98%                          |

<sup>a</sup> Reaction conditions: **1a** (0.11 mmol, 1 equiv), **2a** (0.22 mmol, 2 equiv), Pd(OAc)<sub>2</sub> (8 mol %), NOBINAc (28 mol %), CsF (0.22 mmol, 2 equiv), Oxidant (0.11 mmol, 1 equiv) in 1.0 mL THF at 75 °C 18h in dry air. <sup>b</sup> Crude yield of **3a** determined by <sup>1</sup>H NMR with CH<sub>2</sub>Br<sub>2</sub> as an internal standard. <sup>c</sup> Enantioselectivity of **3a** was determined by HPLC analysis.

**Table S6.** Ligand to Pd(II) Ratio Screening

| S. No.   | Pd(OAc) <sub>2</sub> (mol %) | NOBINAc (mol %) | Yield <b>3a</b> (%) <sup>b</sup> | ee <b>3a</b> (%) <sup>c</sup> |
|----------|------------------------------|-----------------|----------------------------------|-------------------------------|
| <b>1</b> | 5                            | 5               | 32                               | 85                            |
| <b>2</b> | 5                            | 10              | 36                               | 89                            |
| <b>3</b> | 8                            | 8               | 45                               | 84                            |
| <b>4</b> | 8                            | 16              | 56                               | 90                            |
| <b>5</b> | 10                           | 20              | 58                               | 90                            |
| <b>6</b> | 8                            | 24              | 64                               | 93                            |
| <b>7</b> | <b>8</b>                     | <b>28</b>       | <b>70</b>                        | <b>98</b>                     |
| <b>8</b> | 8                            | 32              | 71                               | 98                            |

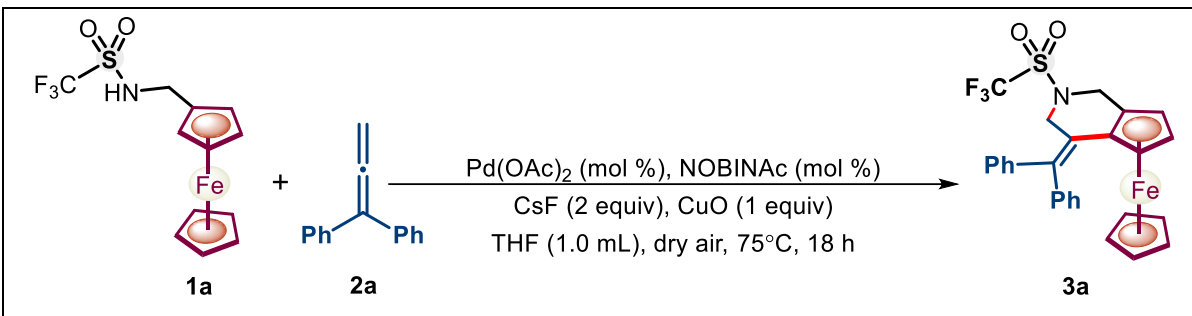

<sup>a</sup> Reaction conditions: **1a** (0.11 mmol, 1 equiv), **2a** (0.22 mmol, 2 equiv), CsF (0.22 mmol, 2 equiv), CuO (0.11 mmol, 1 equiv) in 1.0 mL THF at 75 °C 18 h in dry air by varying Pd(OAc)<sub>2</sub> (mol %), and NOBINAc (mol %) loading. <sup>b</sup> Crude yield of **3a** determined by <sup>1</sup>H NMR with CH<sub>2</sub>Br<sub>2</sub> as an internal standard. <sup>c</sup> Enantioselectivity of **3a** was determined by HPLC analysis.

**Scheme S2.** General procedure for the Pd-catalyzed annulation of ferrocenyl secondary amines with allenes

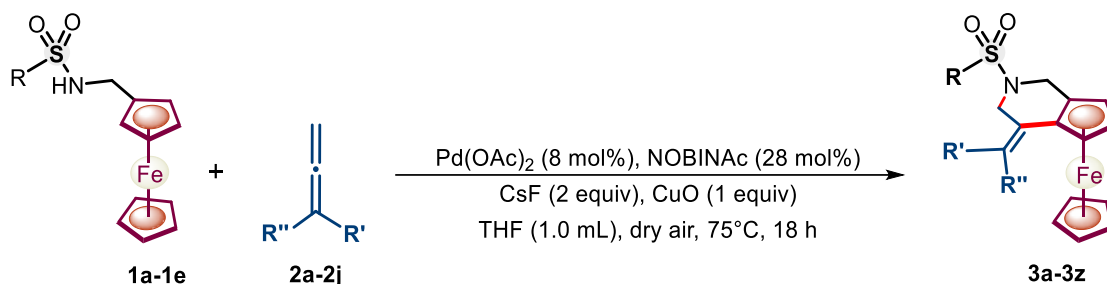

In a Schlenk tube, Pd(OAc)<sub>2</sub> (2.5 mg, 0.012 mmol, 8 mol%), NOBINAc (14 mg, 0.04 mmol, 28 mol %), CuO (11.5 mg, 0.14 mmol, 1 equiv.), CsF (44 mg, 0.28 mmol, 2 equiv.) and ferrocenyl secondary amine **1a** (50 mg, 0.14 mmol, 1 equiv.) were added in dry THF (1.5 mL) under an inert atmosphere and the resulted orange colored solution was stirred for 10 min. After pre-stirring, allene **2a** (55  $\mu$ L, 0.29 mmol, 2 equiv.) was added. The tube was sealed with a rubber septum, and a dry air atmosphere was maintained in the flask with a balloon. The reaction was heated at 75 °C, stirred for 18 h, and then cooled to room temperature. The crude reaction mixture was passed through a celite pad, evaporation and column chromatography on silica gel (mesh 230-400) using hexane: ethyl acetate solvent system to afford ferrocene fused tetrahydropyridines (**3a-4a**).

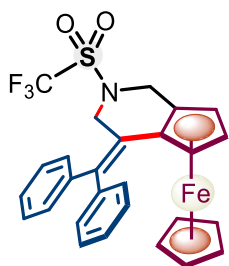

**Ferrocene fused tetrahydropyridine 3a** was purified on silica gel (mesh 230-400) in (hexanes: ethyl acetate; 95:5), obtained as an orange-red solid, mp: 122-124 °C. Yield: 52 mg (70%).  $^1\text{H}$  NMR (400 MHz,  $\text{CDCl}_3$ )  $\delta$  7.45 – 7.33 (m, 5H), 7.31 (d,  $J = 7.5$  Hz, 1H), 7.26 (d,  $J = 7.4$  Hz, 2H), 7.21 (d,  $J = 7.4$  Hz, 2H), 4.69 (d,  $J = 13.4$  Hz, 2H), 4.37 (s, 2H), 4.20 (brs, 6H), 4.06 (s, 1H), 3.27 (s, 1H).  $^{13}\text{C}\{^1\text{H}\}$  NMR (176 MHz,  $\text{CDCl}_3$ )  $\delta$  142.5 (C), 141.3 (C), 138.2 (C), 129.2 (CH), 128.9 (CH), 128.7 (CH), 128.5 (CH), 127.5 (CH), 127.4 (CH), 126.9 (C), 120.03 (d,  $J = 323.7$  Hz  $\text{CF}_3$ ), 81.5 (C), 70.6 (CH), 68.1 (CH), 66.4 (CH), 65.2 (CH), 48.9 ( $\text{CH}_2$ ), 47.1 ( $\text{CH}_2$ ).  $^{19}\text{F}$  NMR (471 MHz,  $\text{CDCl}_3$ )  $\delta$  -75.38. HRLCMS (ESI)  $m/z$ : [M] Calcd for  $\text{C}_{27}\text{H}_{22}\text{F}_3\text{FeNO}_2\text{S}$  537.0660; Found 537.0668. The enantioselectivity of product **3a** was determined by chiral HPLC analysis on OZ-3 column (hexane: isopropanol = 95:5, 1 mL/min,  $\lambda=254$  nm).

### Racemic sample of **3a**

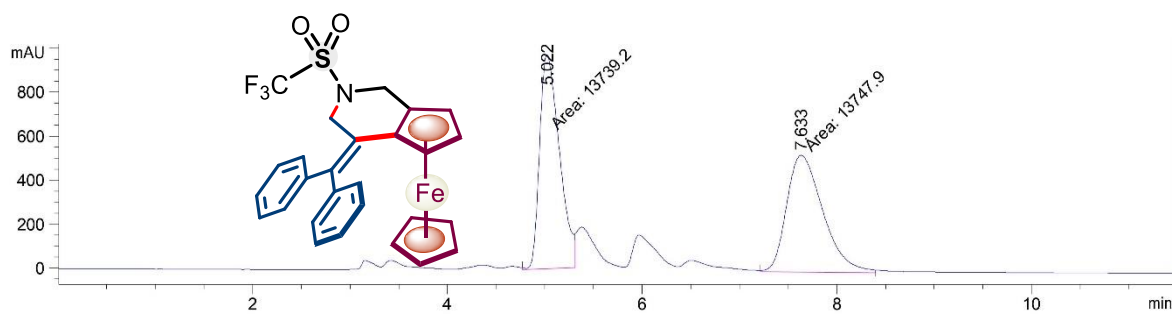

| Peak # | RetTime [min] | Type | Width [min] | Area [mAU*s] | Height [mAU] | Area %  |
|--------|---------------|------|-------------|--------------|--------------|---------|
| 1      | 5.022         | MM   | 0.2354      | 1.37392e4    | 972.89185    | 49.9843 |
| 2      | 7.633         | MM   | 0.4318      | 1.37479e4    | 530.64594    | 50.0157 |

### Asymmetric sample of (*Rp*)-**3a** obtained using *R*-NOBINAc

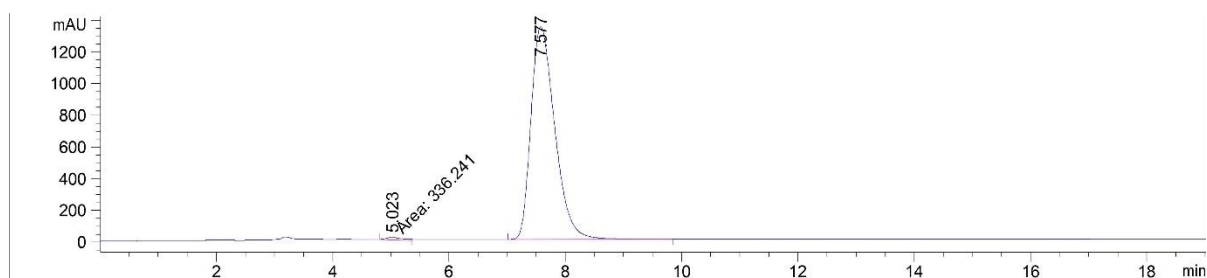

| Peak # | RetTime [min] | Type | Width [min] | Area [mAU*s] | Height [mAU] | Area %  |
|--------|---------------|------|-------------|--------------|--------------|---------|
| 1      | 5.023         | MM   | 0.3563      | 336.24100    | 15.73049     | 0.8749  |
| 2      | 7.577         | BB   | 0.4395      | 3.80976e4    | 1340.87231   | 99.1251 |

### Asymmetric sample of (*Sp*)-**3a** obtained using *S*-NOBINAc

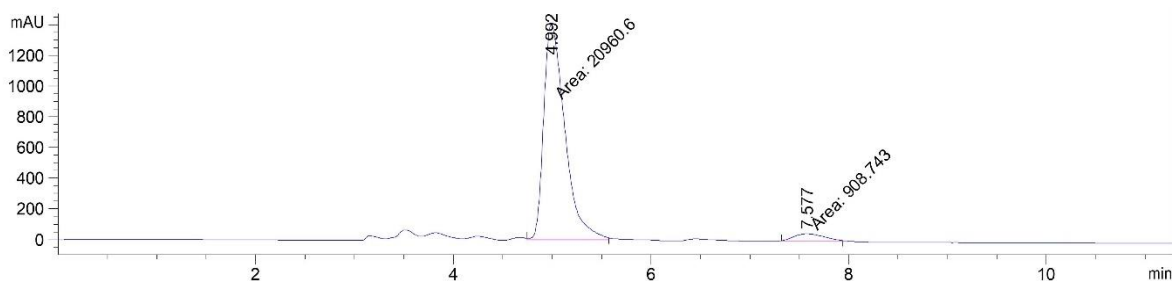

| Peak # | RetTime [min] | Type | Width [min] | Area [mAU*s] | Height [mAU] | Area %  |
|--------|---------------|------|-------------|--------------|--------------|---------|
| 1      | 4.992         | MM   | 0.2487      | 2.09606e4    | 1404.80542   | 95.8447 |
| 2      | 7.577         | MM   | 0.3394      | 908.74316    | 44.63121     | 4.1553  |

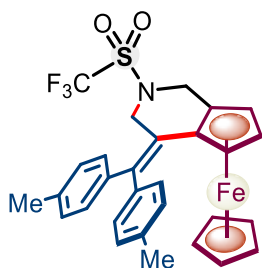

**Ferrocene fused tetrahydropyridine 3b** was purified on silica gel (mesh 230-400) in (hexanes: ethyl acetate; 98:2), obtained as an orange solid, mp: 117-118 °C. Yield: 51 mg (65%).  $^1\text{H}$  NMR (400 MHz,  $\text{CDCl}_3$ )  $\delta$  7.21 (d,  $J = 7.5$  Hz, 2H), 7.15 (dd,  $J = 12.5, 7.9$  Hz, 4H), 7.07 (d,  $J = 7.9$  Hz, 2H), 4.75 (d,  $J = 14.7$  Hz, 1H), 4.68 (d,  $J = 12.8$  Hz, 1H), 4.39 (d,  $J = 11.8$  Hz, 1H), 4.31 (s, 1H), 4.16 (s, 6H), 4.03 (t,  $J = 2.4$  Hz, 1H), 3.31 (d,  $J = 1.2$  Hz, 1H), 2.41 (s, 3H), 2.37 (s, 3H).  $^{13}\text{C}\{^1\text{H}\}$  NMR (176 MHz,  $\text{CDCl}_3$ )  $\delta$  139.7 (C), 138.6 (C), 138.3 (C), 137.2 (CH), 137.0 (CH), 129.4 (CH), 129.2 (CH), 129.0 (CH), 128.8 (CH), 126.1 (C),  $\delta$  120.0 (q,  $J = 324.0$  Hz,  $\text{CF}_3$ ), 81.3 (C), 70.6 (CH), 68.8 (C), 67.9 (CH), 66.5 (CH), 65.0 (CH), 49.1 ( $\text{CH}_2$ ), 47.1 ( $\text{CH}_2$ ), 21.4 ( $\text{CH}_3$ ), 21.2 ( $\text{CH}_3$ ).  $^{19}\text{F}$  NMR (471 MHz,  $\text{CDCl}_3$ )  $\delta$  -75.33. HRLCMS (APCI)  $m/z$ :  $[\text{M}+\text{H}]^+$  Calcd for  $\text{C}_{29}\text{H}_{27}\text{F}_3\text{FeNO}_2\text{S}$  566.1063; Found 566.1107. The enantioselectivity of product **3b** was determined by chiral HPLC analysis on OZ-3 column (hexane: isopropanol = 98:2, 1 mL/min,  $\lambda=254$  nm).



### Racemic sample (**3b**)

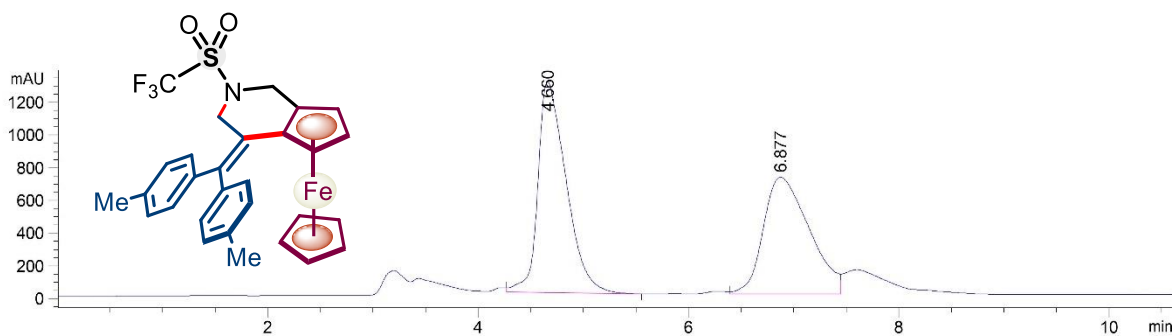

| Peak # | RetTime [min] | Type | Width [min] | Area [mAU*s] | Height [mAU] | Area %  |
|--------|---------------|------|-------------|--------------|--------------|---------|
| 1      | 4.660         | MM   | 0.3027      | 3.51966e4    | 1937.99377   | 50.0635 |
| 2      | 6.880         | MM   | 0.4917      | 3.51073e4    | 1189.95642   | 49.9365 |

### Asymmetric sample of (*R**p*)-**3b** obtained using *R*-NOBINAc

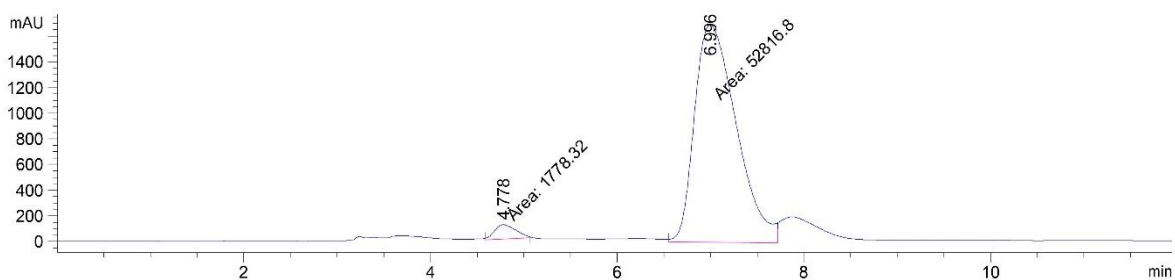

| Peak # | RetTime [min] | Type | Width [min] | Area [mAU*s] | Height [mAU] | Area %  |
|--------|---------------|------|-------------|--------------|--------------|---------|
| 1      | 4.778         | MM   | 0.2653      | 1778.32129   | 111.71938    | 3.2573  |
| 2      | 6.996         | MM   | 0.5192      | 5.28168e4    | 1695.42053   | 96.7427 |

### Asymmetric sample of (*S**p*)-**3b** obtained using *S*-NOBINAc

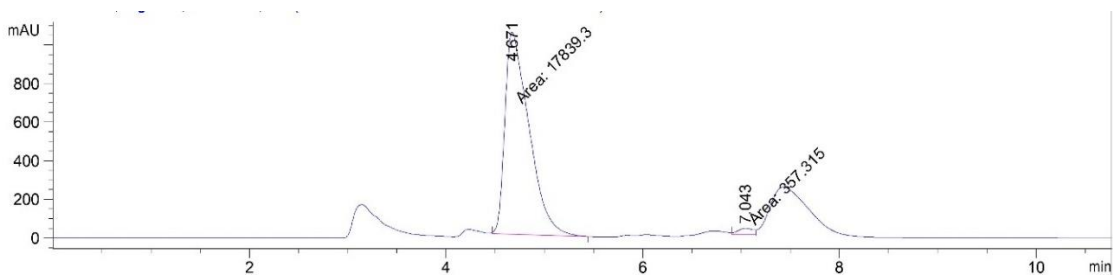

| Peak # | RetTime [min] | Type | Width [min] | Area [mAU*s] | Height [mAU] | Area %  |
|--------|---------------|------|-------------|--------------|--------------|---------|
| 1      | 4.671         | MM   | 0.2837      | 1.78393e4    | 1048.19385   | 98.0364 |
| 2      | 7.043         | MM   | 0.1843      | 357.31464    | 32.30664     | 1.9636  |

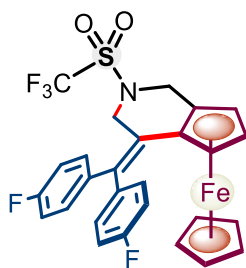

**Ferrocene fused tetrahydropyridine 3c** was purified on silica gel (mesh 230-400) in (hexanes: ethyl acetate; 98:2), obtained as an orange solid, mp: 112 °C -113°C. Yield: 56 mg (68%).  $^1\text{H}$  NMR (700 MHz,  $\text{CDCl}_3$ )  $\delta$  7.21 (brs, 2H), 7.17 – 7.06 (m, 6H), 4.74 (brs, 1H), 4.64 (brs, 1H), 4.38 (d,  $J = 32.7$  Hz, 2H), 4.16 (s, 6H), 4.08 (s, 1H), 3.27 (s, 1H).  $^{13}\text{C}\{^1\text{H}\}$  NMR (176 MHz,  $\text{CDCl}_3$ )  $\delta$  162.8 (d,  $J = 25.8$  Hz CF), 161.4 (d,  $J = 26.1$  Hz CF), 138.2 (C), 137.1 (C), 135.8 (C), 131.0 (d,  $J = 7.2$  Hz CH), 130.7 (d,  $J = 7.7$  Hz CH), 127.9 (CH),  $\delta$  119.9 (d,  $J = 323.4$  Hz  $\text{CF}_3$ ), 115.8 (d,  $J = 21.6$  Hz CH), 115.7 (d,  $J = 21.7$  Hz CH), 81.6 (C), 70.6 (CH), 68.2 (CH), 66.3 (CH), 65.4 (CH), 49.0 ( $\text{CH}_2$ ), 47.0 ( $\text{CH}_2$ ).  $^{19}\text{F}$  NMR (471 MHz,  $\text{CDCl}_3$ )  $\delta$  -75.46, -114.0. HRLCMS (APCI)  $m/z$ : [M] Calcd for  $\text{C}_{27}\text{H}_{20}\text{F}_5\text{FeNO}_2\text{S}$  573.0479; Found 573.0483. The enantioselectivity of product **3c** was determined by chiral HPLC analysis on the OZ-3 column (hexane: isopropanol = 98:2, 1 mL/min,  $\lambda=254$  nm).

### Racemic sample (3c)

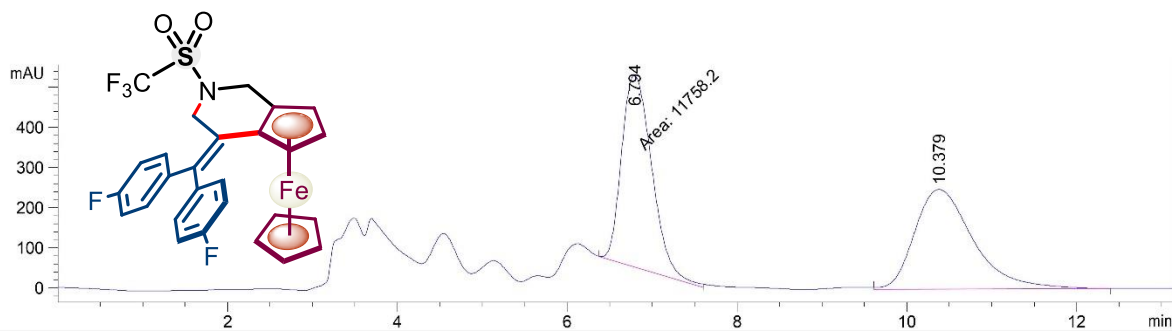

| Peak # | RetTime [min] | Type | Width [min] | Area [mAU*s] | Height [mAU] | Area %  |
|--------|---------------|------|-------------|--------------|--------------|---------|
| 1      | 6.794         | MM   | 0.4105      | 1.17582e4    | 477.45154    | 49.7680 |
| 2      | 10.379        | VB   | 0.7380      | 1.18678e4    | 248.14557    | 50.2320 |

### Asymmetric sample (3c)

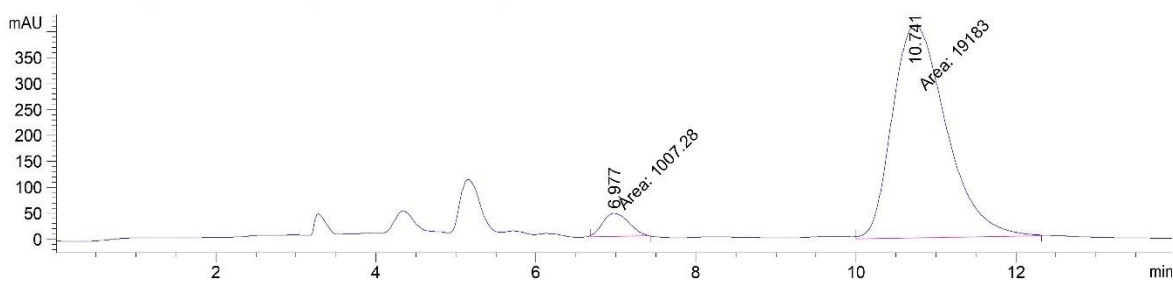

| Peak # | RetTime [min] | Type | Width [min] | Area [mAU*s] | Height [mAU] | Area %  |
|--------|---------------|------|-------------|--------------|--------------|---------|
| 1      | 6.977         | MM   | 0.3799      | 1007.28290   | 44.18793     | 4.9889  |
| 2      | 10.741        | MM   | 0.7787      | 1.91830e4    | 410.56448    | 95.0111 |

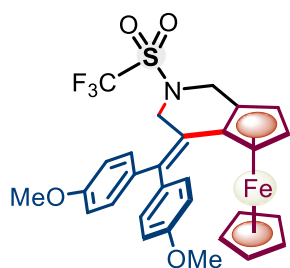

**Ferrocene fused tetrahydropyridine 3d** was purified on silica gel (mesh 230-400) in (hexanes: ethyl acetate; 95:5), obtained as an orange solid, mp:107 °C-108 °C. Yield: 53 mg (62%).  $^1\text{H}$  NMR (400 MHz,  $\text{CDCl}_3$ )  $\delta$  7.15 (d,  $J = 8.4$  Hz, 2H), 7.09 (d,  $J = 8.5$  Hz, 2H), 6.91 (dd,  $J = 14.8, 8.5$  Hz, 4H), 4.72 (t,  $J = 20.3$  Hz, 2H), 4.47 – 4.35 (m, 1H), 4.31 (s, 1H), 4.15 (s, 5H), 4.09 (d,  $J = 14.0$  Hz, 1H), 4.05 – 4.02 (m, 1H), 3.87 (s, 3H), 3.84 (s, 3H), 3.35 (s, 1H).  $^{13}\text{C}\{^1\text{H}\}$  NMR (176 MHz,  $\text{CDCl}_3$ )  $\delta$  159.5 (C), 159.4 (C), 145.3 (C), 134.2 (C), 131.2 (CH), 130.7 (C), 128.9 (CH),  $\delta$  120.9 (d,  $J = 337.0$  Hz,  $\text{CF}_3$ ), 120.4 (C), 113.9 (CH), 113.6 (CH), 80.4 (C), 69.8 (CH), 69.0 (CH), 68.9 (CH), 68.6 (CH), 68.4 (C), 55.4 ( $\text{CH}_3$ ), 55.3 ( $\text{CH}_3$ ), 47.8 ( $\text{CH}_2$ ), 46.4 ( $\text{CH}_2$ ).  $^{19}\text{F}$  NMR (471 MHz,  $\text{CDCl}_3$ )  $\delta$  -78.36. HRLCMS (ESI)  $m/z$ : [M] Calcd for  $\text{C}_{29}\text{H}_{26}\text{F}_3\text{FeNO}_4\text{S}$  597.0879; Found 597.0895. The enantioselectivity of the product **3d** was determined by chiral HPLC analysis on OZ-3 column (hexane: isopropanol = 96:4, 1 mL/min,  $\lambda=254$  nm).

### Racemic sample 3d

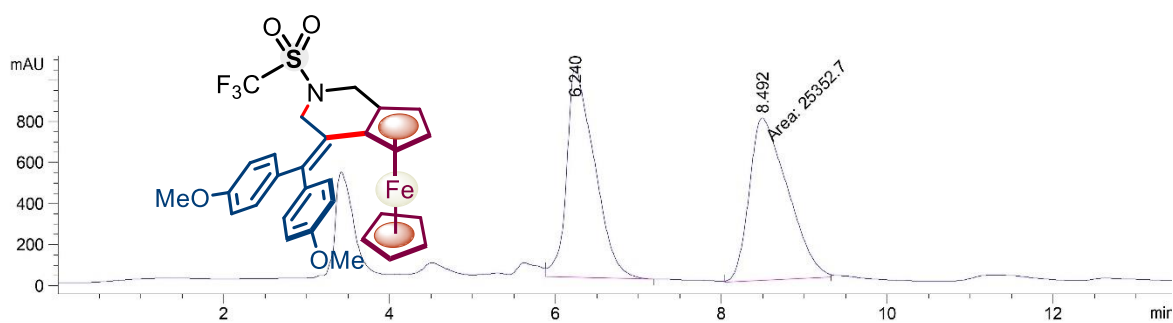

| Peak # | RetTime [min] | Type | Width [min] | Area [mAU*s] | Height [mAU] | Area %  |
|--------|---------------|------|-------------|--------------|--------------|---------|
| 1      | 6.240         | VB   | 0.3194      | 2.39082e4    | 1027.80359   | 48.5339 |
| 2      | 8.492         | MM   | 0.5346      | 2.53527e4    | 790.43469    | 51.4661 |

### Asymmetric sample (3d)

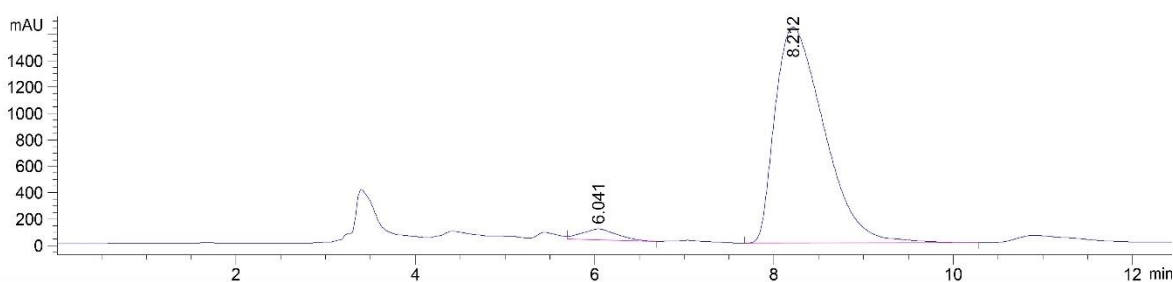

| Peak # | RetTime [min] | Type | Width [min] | Area [mAU*s] | Height [mAU] | Area %  |
|--------|---------------|------|-------------|--------------|--------------|---------|
| 1      | 6.041         | VB   | 0.3820      | 2290.65186   | 83.50723     | 3.5567  |
| 2      | 8.212         | BB   | 0.6108      | 6.21138e4    | 1636.51929   | 96.4433 |

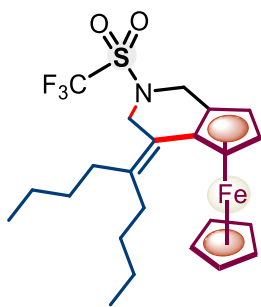

**Ferrocene fused tetrahydropyridine 3e** was purified on silica gel (mesh 230-400) in (hexanes: ethyl acetate; 99:1), obtained as a yellow viscous liquid. Yield: 42 mg (59% yield).  $^1\text{H}$  NMR (400 MHz,  $\text{CDCl}_3$ )  $\delta$  4.71 (d,  $J = 14.1$  Hz, 2H), 4.43 (s, 1H), 4.32 (s, 1H), 4.26 (s, 1H), 4.15 (s, 5H), 4.06 (s, 1H), 2.57 (s, 1H), 2.10 – 2.16 (m, 4H), 1.63 – 1.38 (m, 8H), 1.08 – 0.98 (m, 6H).  $^{13}\text{C}\{^1\text{H}\}$  NMR (176 MHz,  $\text{CDCl}_3$ )  $\delta$  139.4 (C), 121.5 (C), 120.3 (q,  $J = 324.0$  Hz  $\text{CF}_3$ ), 80.5 (C), 70.7 (CH), 70.2 (CH), 68.0 (CH), 66.9 (CH), 64.9 (C), 47.5 ( $\text{CH}_2$ ), 46.9 ( $\text{CH}_2$ ), 33.9 ( $\text{CH}_2$ ), 33.4 ( $\text{CH}_2$ ), 31.0 ( $\text{CH}_2$ ), 30.6 ( $\text{CH}_2$ ), 23.3 ( $\text{CH}_2$ ), 23.0 ( $\text{CH}_2$ ), 14.2 ( $\text{CH}_3$ ), 13.9 ( $\text{CH}_3$ ).  $^{19}\text{F}$  NMR (471 MHz,  $\text{CDCl}_3$ )  $\delta$  -75.1. HRLCMS (ESI)  $m/z$ : [M] Calcd for  $\text{C}_{26}\text{H}_{22}\text{F}_3\text{FeNO}_2\text{S}$  497.1294; Found 497.1260. The enantioselectivity of the product **3e** was determined by chiral HPLC analysis on OZ3 column (hexane: isopropanol = 99:1, 1 mL/min,  $\lambda=254$  nm).

### Racemic sample 3e

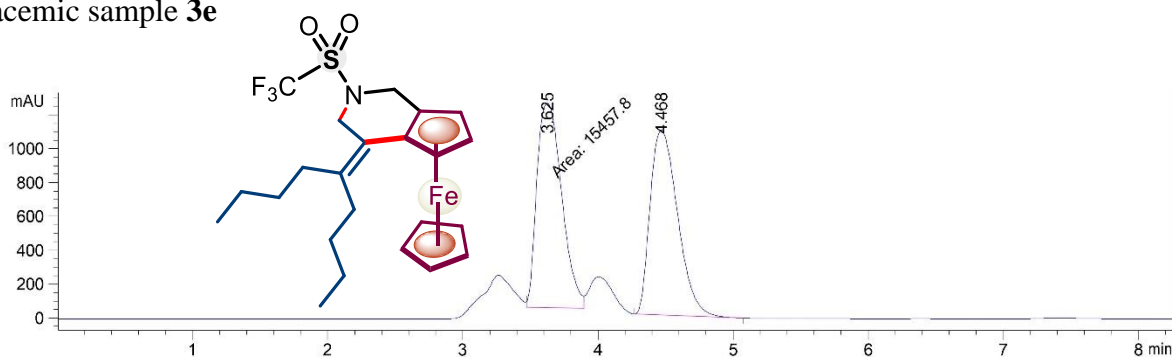

| Peak # | RetTime [min] | Type | Width [min] | Area [mAU*s] | Height [mAU] | Area %  |
|--------|---------------|------|-------------|--------------|--------------|---------|
| 1      | 3.625         | MM   | 0.2131      | 1.54578e4    | 1208.95850   | 49.9239 |
| 2      | 4.468         | BB   | 0.2254      | 1.55050e4    | 1093.59460   | 50.0761 |

### Asymmetric sample 3e

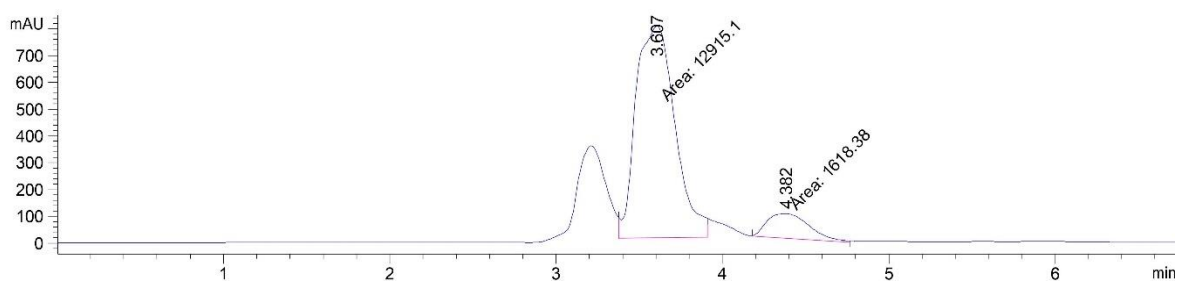

| Peak # | RetTime [min] | Type | Width [min] | Area [mAU*s] | Height [mAU] | Area %  |
|--------|---------------|------|-------------|--------------|--------------|---------|
| 1      | 3.607         | MM   | 0.2723      | 1.29151e4    | 790.48096    | 88.8645 |
| 2      | 4.382         | MM   | 0.2948      | 1618.37610   | 91.50945     | 11.1355 |

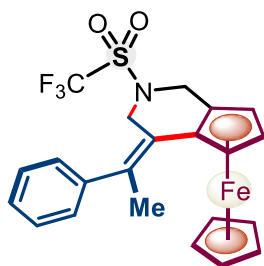

**Ferrocene fused tetrahydropyridine 3f** was purified on silica gel (mesh 230-400) in (hexanes: ethyl acetate; 98:2), obtained as an orange solid, mp:103 °C -104°C. Yield: 43 mg (63%, *E:Z* 1:10). <sup>1</sup>H NMR (400 MHz, CDCl<sub>3</sub>) δ 7.41 (t, *J* = 7.4 Hz, 2H), 7.34 (d, *J* = 7.4 Hz, 1H), 7.19 (d, *J* = 7.1 Hz, 2H), 4.80 (d, *J* = 14.5 Hz, 1H), 4.67 (d, *J* = 1.5 Hz, 1H), 4.45 (d, *J* = 14.4 Hz, 1H), 4.38 (s, 1H), 4.33 (t, *J* = 2.5 Hz, 1H), 4.24 (s, 6H), 3.78 – 3.57 (m, 1H), 2.36 (s, 3H). <sup>13</sup>C{<sup>1</sup>H} NMR (126 MHz, CDCl<sub>3</sub>) δ 143.5 (C), 134.8 (CH), 128.5 (CH), 127.9 (CH), 127.1 (CH), 124.7 (C), δ 121.3 (d, *J* = 337.0 Hz CF<sub>3</sub>), 80.8 (C), 70.5 (CH), 68.8 (C), 68.0 (CH), 67.2 (CH), 65.0 (CH), 48.9 (CH<sub>2</sub>), 47.0 (CH<sub>2</sub>), 23.0 (CH<sub>3</sub>). <sup>19</sup>F NMR (471 MHz, CDCl<sub>3</sub>) δ -75.50. HRLCMS (APCI) *m/z*: [M] Calcd for C<sub>22</sub>H<sub>20</sub>F<sub>3</sub>FeNO<sub>2</sub>S 476.0589; Found 476.0585. The enantioselectivity of product **3f** was determined by chiral HPLC analysis on OZ-3 column (hexane: isopropanol = 98:2, 1 mL/min, λ=254 nm).



### Racemic sample (3f)

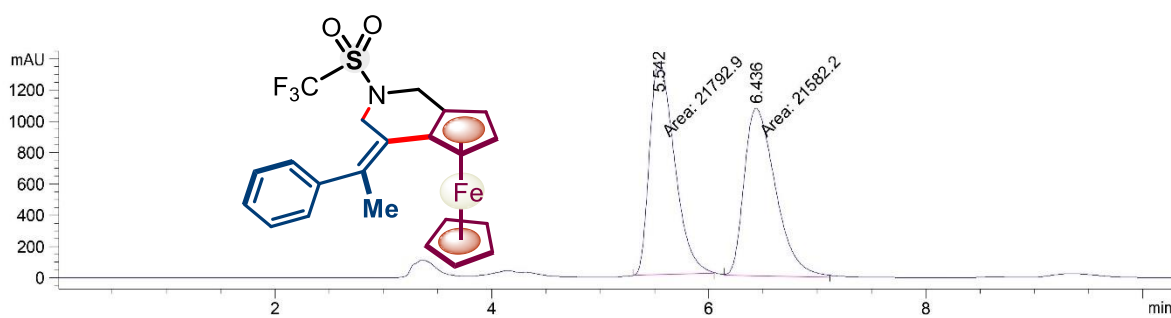

| Peak # | RetTime [min] | Type | Width [min] | Area [mAU*s] | Height [mAU] | Area %  |
|--------|---------------|------|-------------|--------------|--------------|---------|
| 1      | 5.542         | MM   | 0.2670      | 2.17929e4    | 1360.58948   | 50.2428 |
| 2      | 6.436         | MM   | 0.3360      | 2.15822e4    | 1070.59888   | 49.7572 |

### Asymmetric sample (3f)

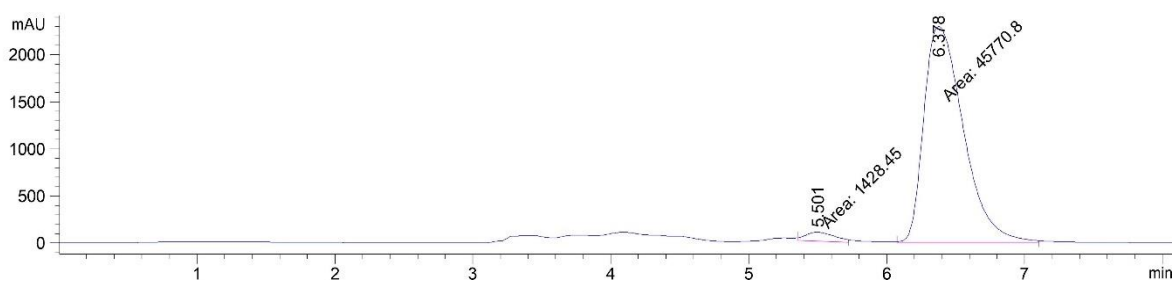

| Peak # | RetTime [min] | Type | Width [min] | Area [mAU*s] | Height [mAU] | Area %  |
|--------|---------------|------|-------------|--------------|--------------|---------|
| 1      | 5.501         | MM   | 0.2484      | 1428.44519   | 95.83167     | 3.0264  |
| 2      | 6.378         | MM   | 0.3324      | 4.57708e4    | 2294.73291   | 96.9736 |

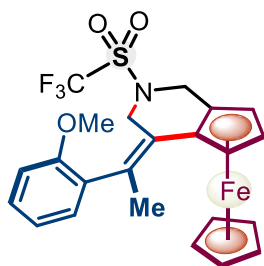

**Ferrocene fused tetrahydropyridine 3g** was purified on silica gel (mesh 230-400) in (hexanes: ethyl acetate; 95:5), obtained as an orange solid, mp:105 °C-106 °C. Yield: 40 mg (55%, *E:Z* 1:1.5).  $^1\text{H}$  NMR (400 MHz,  $\text{CDCl}_3$ )  $\delta$  7.05 (t,  $J = 7.5$  Hz, 1H), 7.00 (d,  $J = 8.3$  Hz, 1H), 6.95 (d,  $J = 6.1$  Hz, 2H), 4.74 (s, 1H), 4.37 (s, 2H), 4.31 (s, 2H), 4.28 (s, 5H), 3.89 (s, 3H), 3.59 (s, 1H), 2.26 (s, 3H).  $^{13}\text{C}\{^1\text{H}\}$  NMR (176 MHz,  $\text{CDCl}_3$ )  $\delta$  155.7 (C), 132.2 (C), 129.5 (CH), 128.9 (CH), 124.7 (CH),  $\delta$  120.3 (d,  $J = 334.0$  Hz  $\text{CF}_3$ ), 111.0 (C), 80.7 (C), 70.5 (CH), 68.8 (C), 67.9 (CH), 67.4 (CH), 66.4 (CH), 55.3 ( $\text{CH}_3$ ), 48.8 ( $\text{CH}_2$ ), 46.9 ( $\text{CH}_2$ ), 22.0 ( $\text{CH}_3$ ).  $^{19}\text{F}$  NMR (471 MHz,  $\text{CDCl}_3$ )  $\delta$  -75.41. HRLCMS (ESI)  $m/z$ :  $[\text{M}+\text{H}]^+$  Calcd for  $\text{C}_{23}\text{H}_{22}\text{F}_3\text{FeNO}_3\text{S}$  505.0617; Found 505.0617. The enantioselectivity of the product **3g** was determined by chiral HPLC analysis on AD-H column (hexane: isopropanol = 92:8, 1 mL/min,  $\lambda=254$  nm).

### Racemic sample (3g)

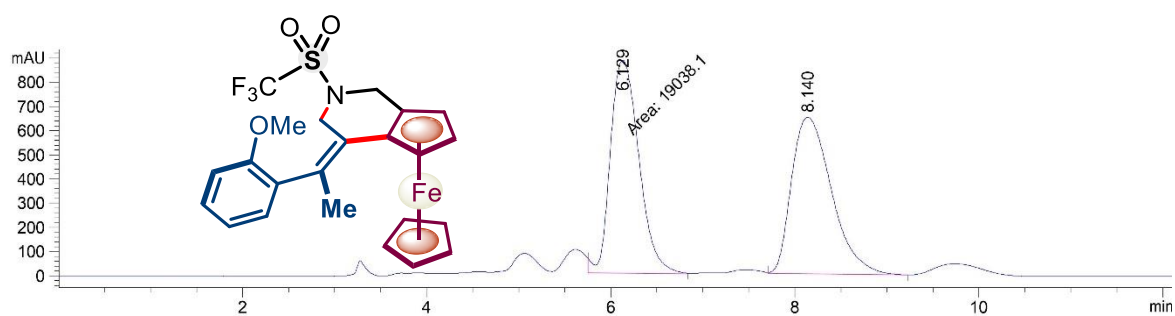

| Peak # | RetTime [min] | Type | Width [min] | Area [mAU*s] | Height [mAU] | Area %  |
|--------|---------------|------|-------------|--------------|--------------|---------|
| 1      | 6.129         | MM   | 0.3599      | 1.90381e4    | 881.56976    | 49.2972 |
| 2      | 8.140         | VB   | 0.4823      | 1.95810e4    | 648.35516    | 50.7028 |

### Asymmetric sample (3g)

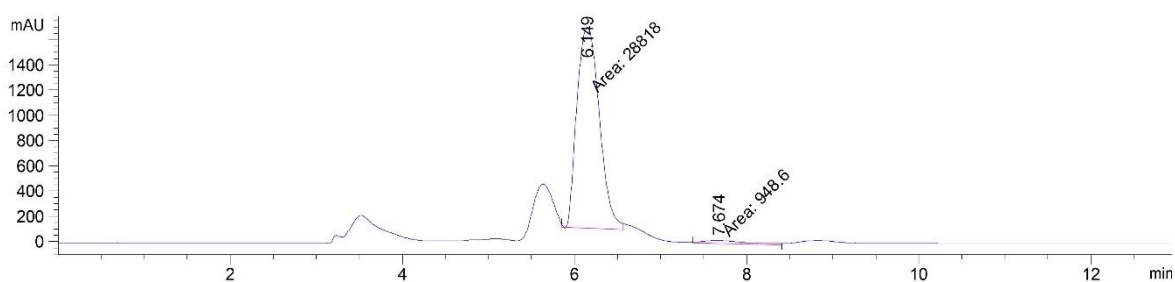

| Peak # | RetTime [min] | Type | Width [min] | Area [mAU*s] | Height [mAU] | Area %  |
|--------|---------------|------|-------------|--------------|--------------|---------|
| 1      | 6.149         | MM   | 0.3011      | 2.88180e4    | 1595.08899   | 96.8132 |
| 2      | 7.674         | MM   | 0.6414      | 948.59967    | 24.64769     | 3.1868  |

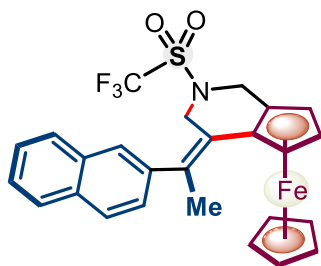

**Ferrocene fused tetrahydropyridine 3h** was purified on silica gel (mesh 230-400) in (hexanes: ethyl acetate; 98:2), obtained as an orange solid, mp: 110 °C-111 °C. Yield: 47 mg (60%, *E:Z* 1:10).  $^1\text{H}$  NMR (500 MHz,  $\text{CDCl}_3$ )  $\delta$  7.94 – 7.85 (m, 3H), 7.64 (s, 1H), 7.52 (dd,  $J = 6.7, 2.6$  Hz, 2H), 7.36 (dd,  $J = 8.4, 1.5$  Hz, 1H), 4.82 (d,  $J = 14.4$  Hz, 1H), 4.71 (d,  $J = 1.5$  Hz, 1H), 4.55 (d,  $J = 15.7$  Hz, 1H), 4.40 (d,  $J = 1.5$  Hz, 1H), 4.35 (t,  $J = 2.5$  Hz, 1H), 4.27 (s, 5H), 4.23 (d,  $J = 6.7$  Hz, 1H), 3.72 (brs, 1H), 2.43 (s, 3H).  $^{13}\text{C}\{^1\text{H}\}$  NMR (176 MHz,  $\text{CDCl}_3$ )  $\delta$  140.9 (C), 134.7 (C), 133.3 (C), 132.4 (C), 128.4 (CH), 127.9 (CH), 127.8 (CH), 126.6 (CH), 126.3 (CH), 126.1 (CH), 125.9 (CH), 125.2 (C), 119.9 (d,  $J = 323.5$  Hz  $\text{CF}_3$ ), 80.8 (C), 70.5 (CH), 68.8 (CH), 68.1 (CH), 67.3 (CH), 65.0 (C), 49.0 ( $\text{CH}_2$ ), 47.1 ( $\text{CH}_2$ ), 23.1 ( $\text{CH}_3$ ).  $^{19}\text{F}$  NMR (471 MHz,  $\text{CDCl}_3$ )  $\delta$  -75.50. HRLCMS (ESI)  $m/z$ : [M] Calcd for  $\text{C}_{26}\text{H}_{22}\text{F}_3\text{FeNO}_2\text{S}$  548.0565; Found 548.0568. The enantioselectivity of the product **3h** was determined by chiral HPLC analysis on AD-H column (hexane: isopropanol = 98:2, 1 mL/min,  $\lambda=254$  nm).

### Racemic sample (3h)

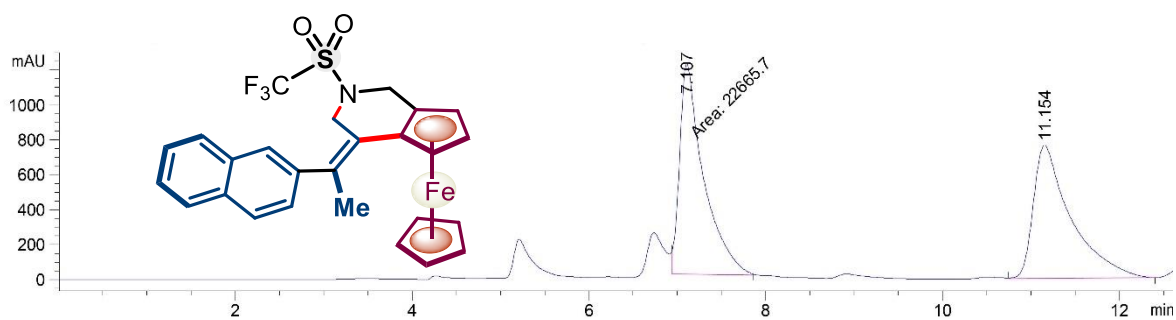

| Peak # | RetTime [min] | Type | Width [min] | Area [mAU*s] | Height [mAU] | Area %  |
|--------|---------------|------|-------------|--------------|--------------|---------|
| 1      | 7.107         | MM   | 0.3127      | 2.26657e4    | 1208.19507   | 50.2169 |
| 2      | 11.154        | VB   | 0.4117      | 2.24699e4    | 762.66101    | 49.7831 |

### Asymmetric sample (3h)

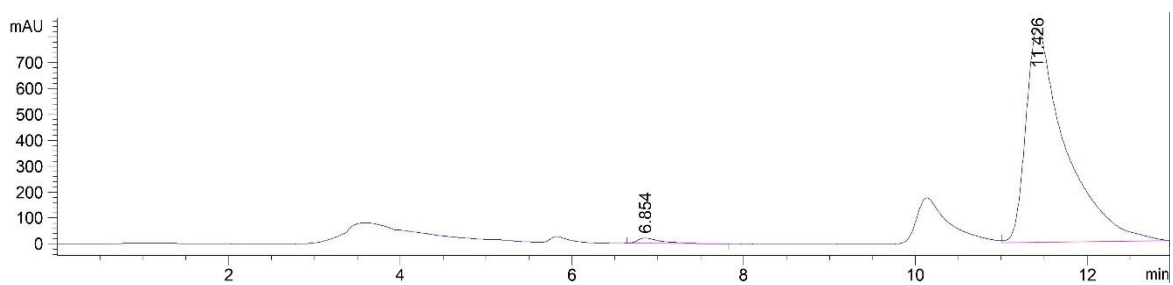

| Peak # | RetTime [min] | Type | Width [min] | Area [mAU*s] | Height [mAU] | Area %  |
|--------|---------------|------|-------------|--------------|--------------|---------|
| 1      | 6.854         | VB   | 0.2800      | 429.72818    | 21.60877     | 1.5896  |
| 2      | 11.426        | VBA  | 0.4493      | 2.66034e4    | 827.02936    | 98.4104 |

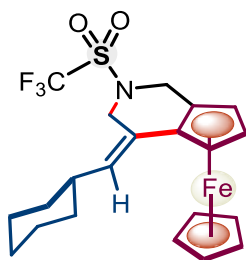

**Ferrocene fused tetrahydropyridine 3i** was purified on silica gel (mesh 230-400) in (hexanes: ethyl acetate; 99:1), obtained as a yellow viscous liquid. Yield: 38 mg (56%, *E:Z* 1:5).  $^1\text{H}$  NMR (400 MHz,  $\text{CDCl}_3$ )  $\delta$  5.39 (d,  $J = 9.4$  Hz, 1H), 4.77 (d,  $J = 14.3$  Hz, 1H), 4.49 (d,  $J = 0.9$  Hz, 1H), 4.37 (s, 1H), 4.33 (brs, 2H), 4.14 (s, 6H), 3.87 (d,  $J = 14.0$  Hz, 1H), 2.71 – 2.55 (m, 1H), 1.88 (t,  $J = 10.1$  Hz, 2H), 1.83 – 1.66 (m, 5H), 1.44 – 1.38 (m, 3H).  $^{13}\text{C}\{^1\text{H}\}$  NMR (176 MHz,  $\text{CDCl}_3$ )  $\delta$  133.5 (C), 126.0 (CH), 120.15 (d,  $J = 323.1$  Hz  $\text{CF}_3$ ), 80.6(C), 70.7 (CH), 68.1 (CH), 67.1 (CH), 64.9 (C), 61.4 (CH), 52.7 ( $\text{CH}_2$ ), 47.0 ( $\text{CH}_2$ ), 37.7 (CH), 33.0 ( $\text{CH}_2$ ), 32.6 ( $\text{CH}_2$ ), 26.0 ( $\text{CH}_2$ ), 25.9 ( $\text{CH}_2$ ), 25.8 ( $\text{CH}_2$ ).  $^{19}\text{F}$  NMR (471 MHz,  $\text{CDCl}_3$ )  $\delta$  -75.52. HRLCMS (ESI)  $m/z$ :  $[\text{M}+\text{H}]^+$  Calcd for  $\text{C}_{21}\text{H}_{25}\text{F}_3\text{FeNO}_2\text{S}$  468.0902; Found 468.0886. The enantioselectivity of product **3i** was determined by chiral HPLC analysis on the AD-H column (hexane: isopropanol = 98:2, 1 mL/min,  $\lambda=254$  nm).

### Racemic sample (3i)

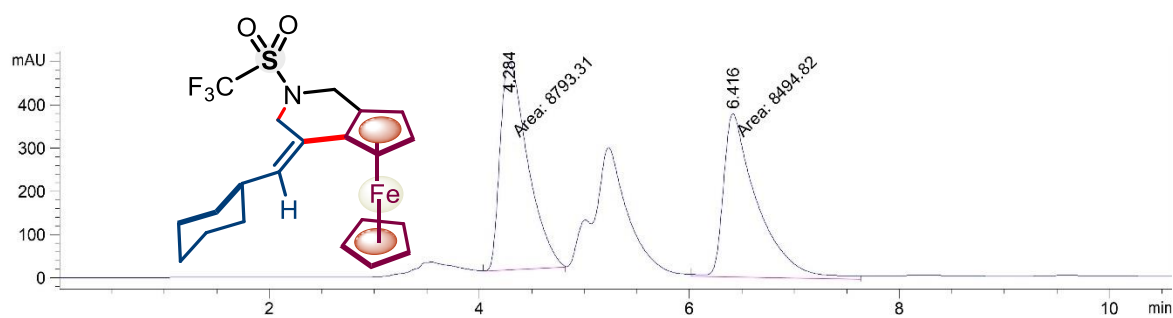

| Peak # | RetTime [min] | Type | Width [min] | Area [mAU*s] | Height [mAU] | Area %  |
|--------|---------------|------|-------------|--------------|--------------|---------|
| 1      | 4.284         | MM   | 0.3048      | 8793.30664   | 480.84598    | 50.8633 |
| 2      | 6.416         | MM   | 0.3742      | 8494.82324   | 378.32681    | 49.1367 |

### Asymmetric sample (3i)

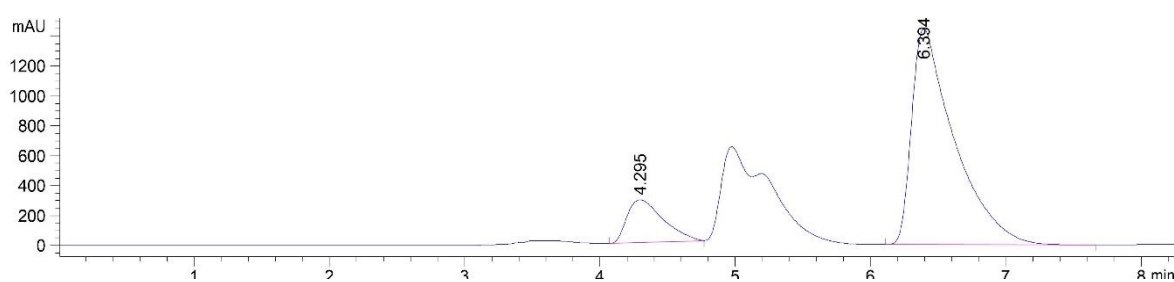

| Peak # | RetTime [min] | Type | Width [min] | Area [mAU*s] | Height [mAU] | Area %  |
|--------|---------------|------|-------------|--------------|--------------|---------|
| 1      | 4.295         | BB   | 0.2822      | 5289.54541   | 285.38135    | 14.3162 |
| 2      | 6.394         | BB   | 0.3053      | 3.16584e4    | 1446.78540   | 85.6838 |

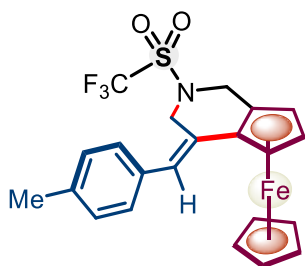

**Ferrocene fused tetrahydropyridine 3j** was purified on silica gel (mesh 230-400) in (hexanes: ethyl acetate; 99:1), obtained as a yellow orange solid, mp: 89 °C-90 °C. Yield: 34 mg (50%, *E:Z* 1:2).  $^1\text{H}$  NMR (400 MHz,  $\text{CDCl}_3$ )  $\delta$  7.25 (d,  $J = 3.1$  Hz, 2H), 7.16 (d,  $J = 8.0$  Hz, 2H), 6.78 (s, 1H), 4.78 (d,  $J = 14.3$  Hz, 1H), 4.69 (s, 1H), 4.60 (d,  $J = 14.8$  Hz, 1H), 4.42 (s, 1H), 4.33 (brs, 2H), 4.22 (s, 6H), 2.39 (s, 3H).  $^{13}\text{C}\{^1\text{H}\}$  NMR (176 MHz,  $\text{CDCl}_3$ )  $\delta$  137.0 (C), 129.4 (CH), 129.0 (CH), 128.5 (CH), 128.4 (C), 122.6 (C), 120.2 (d,  $J = 324.0$  Hz  $\text{CF}_3$ ), 80.7 (C), 71.3 (CH), 70.7 (CH), 68.2 (CH), 67.7 (CH), 61.9 (C), 46.6 ( $\text{CH}_2$ ), 46.4 ( $\text{CH}_2$ ), 21.3 ( $\text{CH}_3$ ).  $^{19}\text{F}$  NMR (471 MHz,  $\text{CDCl}_3$ )  $\delta$  -75.11, -75.16. HRLCMS (ESI)  $m/z$ :  $[\text{M}-\text{H}]^+$  Calcd for  $\text{C}_{22}\text{H}_{20}\text{F}_3\text{FeNO}_2\text{S}$  475.0511; Found 475.0509. The enantioselectivity of the product **3j** was determined by chiral HPLC analysis on OZ-3 column (hexane: isopropanol = 98:2, 1 mL/min,  $\lambda=254$  nm).



### Racemic sample (3j)

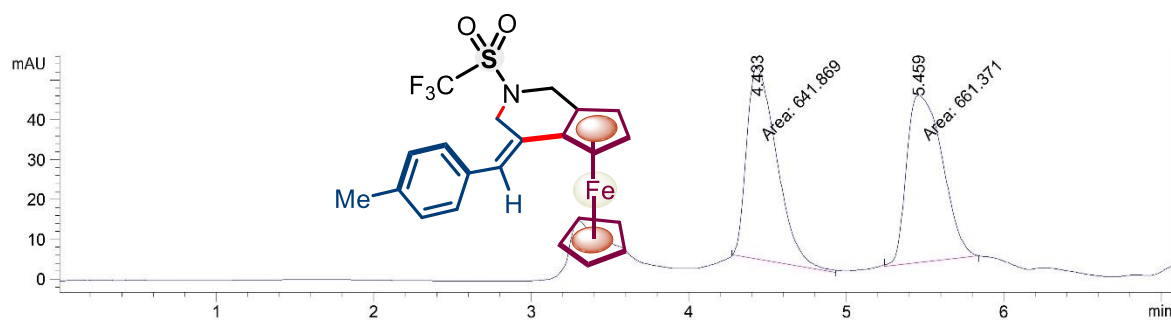

| Peak # | RetTime [min] | Type | Width [min] | Area [mAU*s] | Height [mAU] | Area %  |
|--------|---------------|------|-------------|--------------|--------------|---------|
| 1      | 4.433         | MM   | 0.2203      | 641.86871    | 48.56398     | 49.2518 |
| 2      | 5.459         | MM   | 0.2626      | 661.37146    | 41.97504     | 50.7482 |

Totals :                      1303.24017    90.53902

### Asymmetric sample (3j)

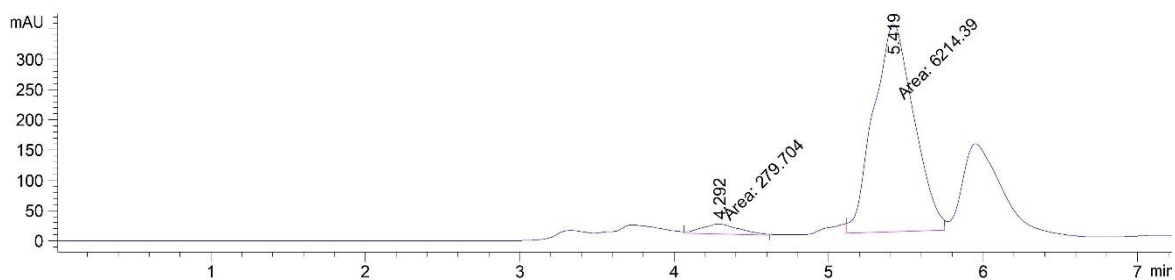

| Peak # | RetTime [min] | Type | Width [min] | Area [mAU*s] | Height [mAU] | Area %  |
|--------|---------------|------|-------------|--------------|--------------|---------|
| 1      | 4.292         | MM   | 0.2787      | 279.70404    | 16.72396     | 4.3071  |
| 2      | 5.419         | MM   | 0.3019      | 6214.38916   | 343.07669    | 95.6929 |

Totals :                      6494.09320    359.80065

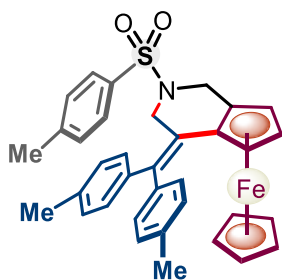

**Ferrocene fused tetrahydropyridine 3k** was purified on silica gel (mesh 230-400) in (hexanes: ethyl acetate; 85:15), obtained as an orange red solid, mp: 141 °C-142 °C. Yield: 47 mg (55%).  $^1\text{H}$  NMR (400 MHz,  $\text{CDCl}_3$ )  $\delta$  7.56 (d,  $J = 7.6$  Hz, 2H), 7.27 (s, 2H), 7.20 – 7.09 (m, 4H), 7.03 (d,  $J = 7.4$  Hz, 2H), 6.89 (d,  $J = 2.7$  Hz, 2H), 4.50 (dd,  $J = 25.1, 14.4$  Hz, 2H), 4.25 (s, 1H), 4.08 (s, 5H), 3.93 (d,  $J = 13.4$  Hz, 2H), 3.73 (s, 1H), 3.13 (s, 1H), 2.45 (s, 3H), 2.38 (s, 6H).  $^{13}\text{C}\{^1\text{H}\}$  NMR (176 MHz,  $\text{CDCl}_3$ )  $\delta$  143.3 (C), 140.0 (C), 139.0 (C), 137.1 (CH), 136.9 (CH), 136.7 (CH), 135.0 (CH), 129.6 (CH), 129.4 (C), 129.2 (C), 129.1 (CH), 129.0 (C), 127.5 (C), 127.1 (C), 82.3 (C), 70.6 (CH), 67.6 (CH), 67.1 (CH), 66.0 (CH), 65.1 (C), 48.6 (CH<sub>2</sub>), 46.4 (CH<sub>2</sub>), 21.6 (CH<sub>3</sub>), 21.3 (CH<sub>3</sub>), 21.2 (CH<sub>3</sub>). HRLCMS (ESI)  $m/z$ : [M] Calcd for  $\text{C}_{35}\text{H}_{33}\text{FeNO}_2\text{S}$  587.1576; Found 587.1566. The enantioselectivity of the product **3k** was determined by chiral HPLC analysis on AD-3 column (hexane: isopropanol = 75:25, 1 mL/min,  $\lambda=254$  nm).

### Racemic sample (**3k**)

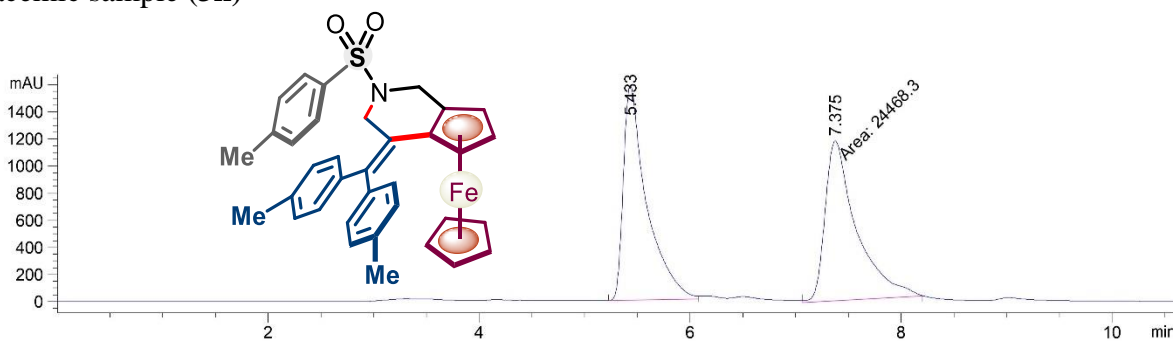

| Peak # | RetTime [min] | Type | Width [min] | Area [mAU*s] | Height [mAU] | Area %  |
|--------|---------------|------|-------------|--------------|--------------|---------|
| 1      | 5.433         | BV   | 0.2170      | 2.43483e4    | 1586.51257   | 49.8771 |
| 2      | 7.375         | MM   | 0.3453      | 2.44683e4    | 1180.87219   | 50.1229 |

### Asymmetric sample of (*Sp*)-**3k** obtained using *S*-NOBINAc

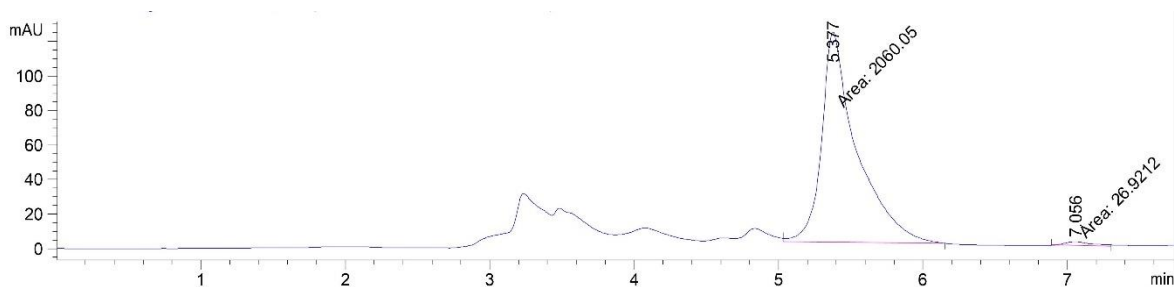

| Peak # | RetTime [min] | Type | Width [min] | Area [mAU*s] | Height [mAU] | Area %  |
|--------|---------------|------|-------------|--------------|--------------|---------|
| 1      | 5.377         | MM   | 0.2820      | 2060.04565   | 121.74028    | 98.7100 |
| 2      | 7.056         | MM   | 0.2194      | 26.92121     | 2.04496      | 1.2900  |

### Asymmetric sample of (*Rp*)-**3k** obtained using *R*-NOBINAc

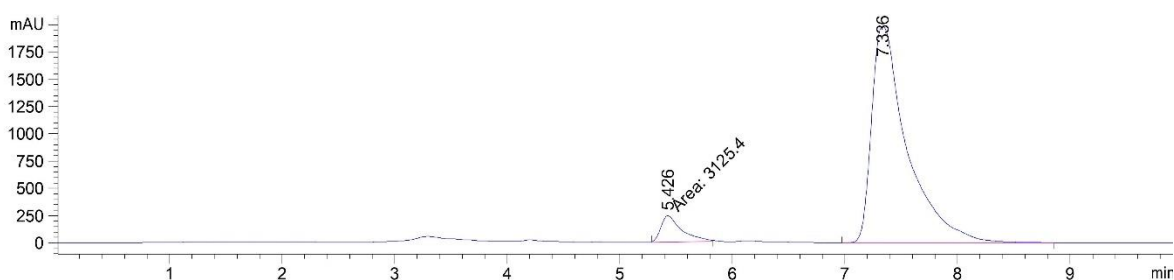

| Peak # | RetTime [min] | Type | Width [min] | Area [mAU*s] | Height [mAU] | Area %  |
|--------|---------------|------|-------------|--------------|--------------|---------|
| 1      | 5.426         | MM   | 0.2133      | 3125.39771   | 244.15727    | 6.7069  |
| 2      | 7.336         | BB   | 0.3153      | 4.34742e4    | 1986.34509   | 93.2931 |

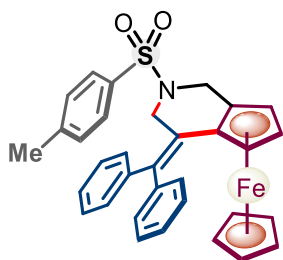

**Ferrocene fused tetrahydropyridine 3l** was purified on silica gel (mesh 230-400) in (hexanes: ethyl acetate; 80:20), obtained as an orange red solid, mp: 132 °C-132 °C. Yield: 47 mg (58%).  $^1\text{H}$  NMR (700 MHz,  $\text{CDCl}_3$ )  $\delta$  7.56 (d,  $J = 8.0$  Hz, 2H), 7.41 – 7.29 (m, 6H), 7.28 (s, 2H), 7.16 (d,  $J = 7.6$  Hz, 2H), 7.11 – 6.98 (m, 2H), 4.54 (d,  $J = 14.2$  Hz, 1H), 4.47 (d,  $J = 14.3$  Hz, 1H), 4.27 (s, 1H), 4.10 (s, 5H), 4.03 (d,  $J = 14.2$  Hz, 1H), 3.92 (s, 1H), 3.85 (d,  $J = 14.4$  Hz, 1H), 3.06 (s, 1H), 2.45 (s, 3H).  $^{13}\text{C}\{^1\text{H}\}$  NMR (176 MHz,  $\text{CDCl}_3$ )  $\delta$  143.3 (C), 142.7 (C), 141.7 (CH), 137.1 (CH), 134.8 (CH), 129.6 (CH), 129.5 (CH), 129.2 (CH), 128.5 (CH), 128.4 (CH), 127.9 (C), 127.5 (C), 127.2 (C), 127.1 (C), 82.5 (C), 78.8 (CH), 70.6 (CH), 67.7 (CH), 66.0 (CH), 65.3 (C), 48.6 ( $\text{CH}_2$ ), 46.3 ( $\text{CH}_2$ ), 21.5 ( $\text{CH}_3$ ). HRLCMS (ESI)  $m/z$ : [M] Calcd for  $\text{C}_{33}\text{H}_{29}\text{FeNO}_2\text{S}$  559.1263; Found 559.1253. The enantioselectivity of the product **3l** was determined by chiral HPLC analysis on AD-3 column (hexane: isopropanol = 85:15, 0.9 mL/min,  $\lambda=254$  nm).

### Racemic sample (**3I**)

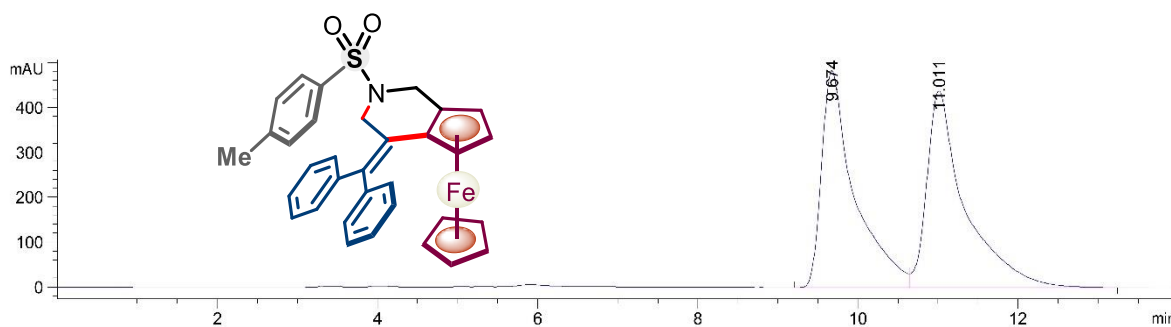

| Peak # | Ret Time [min] | Type | Width [min] | Area [mAU*s] | Height [mAU] | Area %  |
|--------|----------------|------|-------------|--------------|--------------|---------|
| 1      | 9.674          | BV   | 0.4024      | 1.37642e4    | 483.13043    | 48.8097 |
| 2      | 11.011         | VB   | 0.4613      | 1.44355e4    | 437.08127    | 51.1903 |

### Asymmetric sample of (*Sp*)-**3I** obtained using *S*-NOBINAc

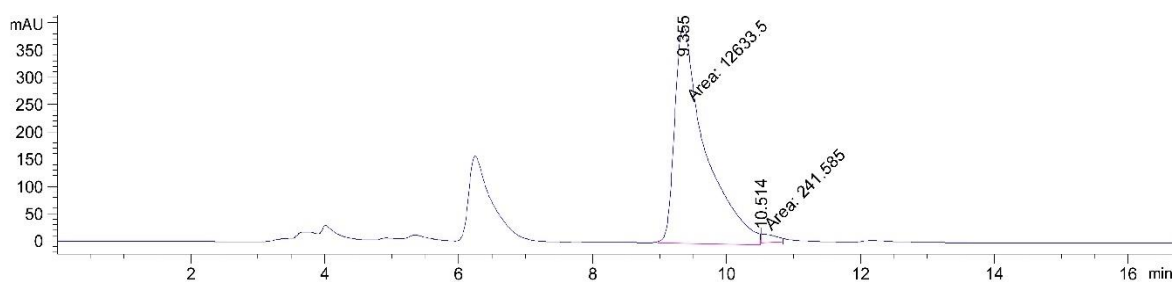

| Peak # | Ret Time [min] | Type | Width [min] | Area [mAU*s] | Height [mAU] | Area %  |
|--------|----------------|------|-------------|--------------|--------------|---------|
| 1      | 9.355          | MM   | 0.5285      | 1.26335e4    | 398.38388    | 98.1236 |
| 2      | 10.514         | MM   | 0.1814      | 241.58542    | 16.67377     | 1.8764  |

### Asymmetric sample of (*Rp*)-**3I** obtained using *R*-NOBINAc

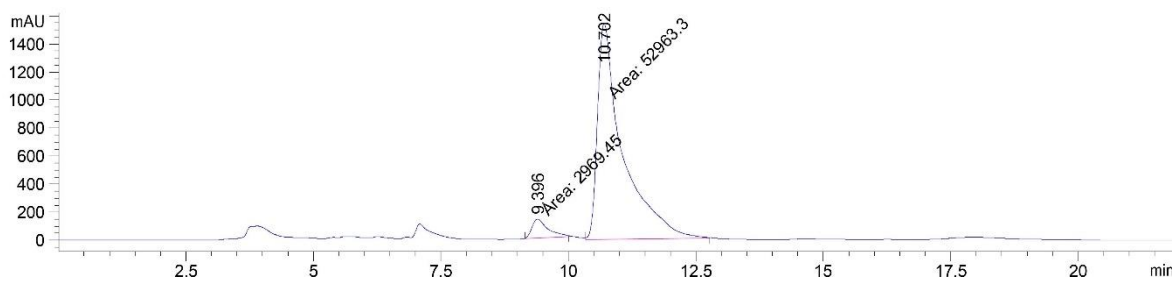

| Peak # | RetTime [min] | Type | Width [min] | Area [mAU*s] | Height [mAU] | Area %  |
|--------|---------------|------|-------------|--------------|--------------|---------|
| 1      | 9.396         | MM   | 0.3638      | 2969.44556   | 136.03685    | 5.3090  |
| 2      | 10.702        | MM   | 0.5736      | 5.29633e4    | 1538.93127   | 94.6910 |

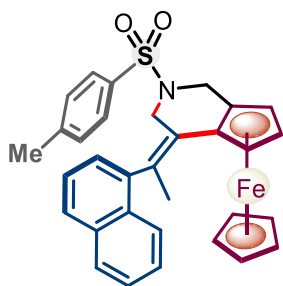

**Ferrocene fused tetrahydropyridine 3m** was purified on silica gel (mesh 230-400) in (hexanes: ethyl acetate; 90:10), obtained as an orange red solid, mp: 129 °C-130 °C. Yield: 42 mg (53%, *E:Z* 1:10).  $^1\text{H}$  NMR (700 MHz,  $\text{CDCl}_3$ )  $\delta$  7.96 – 7.85 (m, 3H), 7.63 (s, 1H), 7.57 – 7.51 (m, 2H), 7.48 (d,  $J = 8.2$  Hz, 2H), 7.34 (dd,  $J = 8.3, 1.3$  Hz, 1H), 7.17 (d,  $J = 8.1$  Hz, 2H), 4.60 (d,  $J = 13.9$  Hz, 2H), 4.37 (d,  $J = 13.5$  Hz, 1H), 4.35 (d,  $J = 1.8$  Hz, 1H), 4.25 (t,  $J = 2.5$  Hz, 1H), 4.19 (s, 5H), 3.72 (d,  $J = 13.6$  Hz, 1H), 3.23 (d,  $J = 13.5$  Hz, 1H), 2.38 (s, 3H), 2.36 (s, 3H).  $^{13}\text{C}\{^1\text{H}\}$  NMR (176 MHz,  $\text{CDCl}_3$ )  $\delta$  143.3 (C), 141.4 (C), 134.0 (CH), 133.3 (CH), 133.0 (CH), 132.3 (CH), 129.4 (CH), 128.1 (CH), 128.0 (CH), 127.7 (C), 127.5 (CH), 126.7 (C), 126.6 (C), 126.4 (CH), 126.2 (C), 125.8 (C), 82.0 (C), 79.2 (CH), 70.5 (CH), 67.8 (CH), 66.9 (CH), 65.3 (C), 48.7 ( $\text{CH}_2$ ), 46.4 ( $\text{CH}_2$ ), 22.9 ( $\text{CH}_3$ ), 21.5 ( $\text{CH}_3$ ). HRLCMS (ESI)  $m/z$ : [M] Calcd for  $\text{C}_{32}\text{H}_{29}\text{FeNO}_2\text{S}$  547.1263; Found 547.1232. The enantioselectivity of the product **3m** was determined by chiral HPLC analysis on the AD-H column (hexane: isopropanol = 90:10, 0.9 mL/min,  $\lambda=254$  nm).

### Racemic sample (3m)

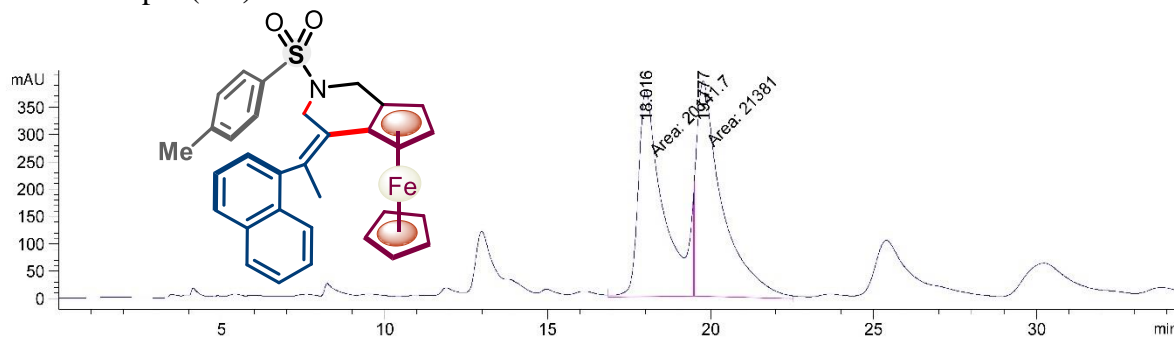

| Peak # | Ret Time [min] | Type | Width [min] | Area [mAU*s] | Height [mAU] | Area %  |
|--------|----------------|------|-------------|--------------|--------------|---------|
| 1      | 18.016         | MM   | 0.8877      | 2.01417e4    | 378.15561    | 48.5077 |
| 2      | 19.777         | MM   | 0.9049      | 2.13810e4    | 393.81238    | 51.4923 |

### Asymmetric sample (3m)

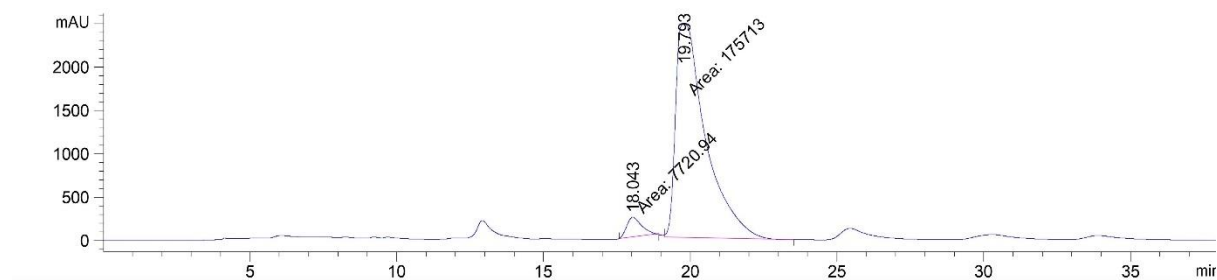

| Peak # | RetTime [min] | Type | Width [min] | Area [mAU*s] | Height [mAU] | Area %  |
|--------|---------------|------|-------------|--------------|--------------|---------|
| 1      | 18.043        | MM   | 0.5727      | 7720.93701   | 224.69550    | 4.2091  |
| 2      | 19.793        | MM   | 1.1893      | 1.75713e5    | 2462.41479   | 95.7909 |

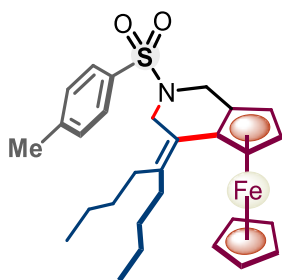

**Ferrocene fused tetrahydropyridine 3n** was purified on silica gel (mesh 230-400) in (hexanes: ethyl acetate; 90:10), obtained as an orange red solid, m.p: 117 °C-118 °C. Yield: 42 mg (56%, *E:Z* 3:2).  $^1\text{H}$  NMR (400 MHz,  $\text{CDCl}_3$ )  $\delta$  7.72 (d,  $J = 8.2$  Hz, 2H), 7.33 (d,  $J = 8.0$  Hz, 2H), 4.47 (d,  $J = 13.8$  Hz, 1H), 4.43 (d,  $J = 13.5$  Hz, 1H), 4.31 (s, 1H), 4.23 (s, 1H), 4.14 (d,  $J = 2.4$  Hz, 1H), 4.05 (s, 5H), 3.66 (d,  $J = 13.4$  Hz, 1H), 3.37 (d,  $J = 13.2$  Hz, 1H), 2.44 (s, 3H), 2.14 – 2.08 (4H), 1.52 – 1.40 (m, 8H), 1.1 – 0.9 (m, 6H).  $^{13}\text{C}\{^1\text{H}\}$  NMR (176 MHz,  $\text{CDCl}_3$ )  $\delta$  143.4 (C), 137.9 (C), 133.9 (C), 129.6 (CH), 127.6 (CH), 122.5 (C), 81.5 (C), 79.3 (C), 70.4 (CH), 67.3 (CH), 66.2 (CH), 64.9 (CH), 47.0 ( $\text{CH}_2$ ), 46.3 ( $\text{CH}_2$ ), 34.0 ( $\text{CH}_2$ ) 33.6 ( $\text{CH}_2$ ), 31.0 ( $\text{CH}_2$ ), 30.6 ( $\text{CH}_2$ ), 23.3 ( $\text{CH}_2$ ), 23.0 ( $\text{CH}_2$ ), 21.5 ( $\text{CH}_3$ ), 14.2 ( $\text{CH}_3$ ), 14.0 ( $\text{CH}_3$ ). HRLCMS (ESI)  $m/z$ : [M] Calcd for  $\text{C}_{29}\text{H}_{37}\text{FeNO}_2\text{S}$  519.1889; Found 519.1868. The enantioselectivity of the product **3n** was determined by chiral HPLC analysis on AD-3 column (hexane: isopropanol = 95:5, 1 mL/min,  $\lambda=254$  nm).



### Racemic sample (3n)

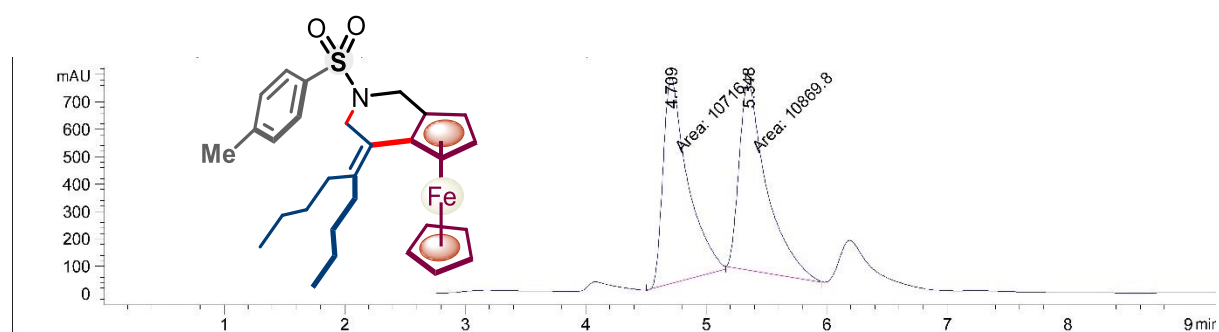

| Peak # | Ret Time [min] | Type | Width [min] | Area [mAU*s] | Height [mAU] | Area %  |
|--------|----------------|------|-------------|--------------|--------------|---------|
| 1      | 4.709          | MM   | 0.2373      | 1.07161e4    | 752.56592    | 49.6440 |
| 2      | 5.348          | MM   | 0.2653      | 1.08698e4    | 682.87201    | 50.3560 |

### Asymmetric sample (3n)

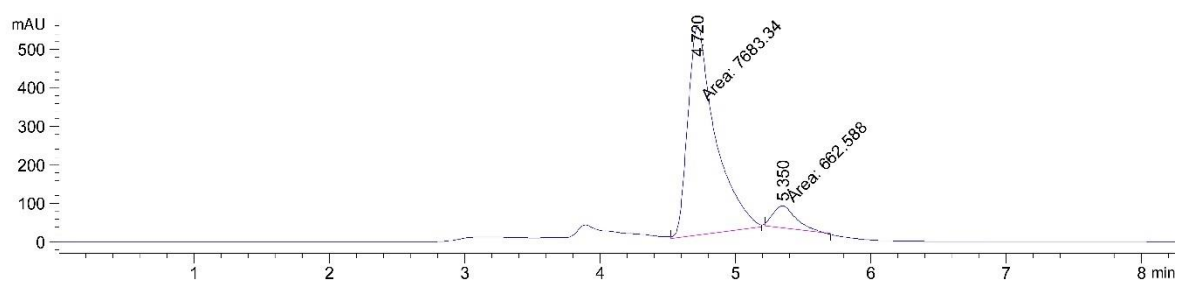

| Peak # | Ret Time [min] | Type | Width [min] | Area [mAU*s] | Height [mAU] | Area %  |
|--------|----------------|------|-------------|--------------|--------------|---------|
| 1      | 4.720          | MM   | 0.2354      | 7683.34131   | 543.95502    | 92.0609 |
| 2      | 5.350          | MM   | 0.1938      | 662.58795    | 56.98755     | 7.9391  |

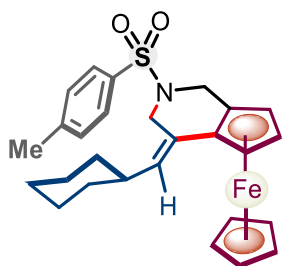

**Ferrocene fused tetrahydropyridine 3o** was purified on silica gel (mesh 230-400) in (hexanes: ethyl acetate; 95:5), obtained as an orange yellow solid, m.p: 114 °C-115 °C. Yield: 37 mg, (53%, *E:Z* 1:5).  $^1\text{H}$  NMR (400 MHz,  $\text{CDCl}_3$ )  $\delta$  7.71 (d,  $J = 8.1$  Hz, 2H), 7.32 (d,  $J = 8.0$  Hz, 2H), 5.34 (d,  $J = 9.7$  Hz, 1H), 4.49 (d,  $J = 13.5$  Hz, 1H), 4.39 (s, 1H), 4.26 (s, 1H), 4.16 (d,  $J = 4.9$  Hz, 2H), 4.07 (s, 5H), 3.63 (d,  $J = 13.6$  Hz, 1H), 3.34 (d,  $J = 12.9$  Hz, 2H), 2.63 – 2.47 (m, 1H), 1.80 – 1.74 (m, 7H), 1.47 – 1.30 (m, 3H).  $^{13}\text{C}\{^1\text{H}\}$  NMR (176 MHz,  $\text{CDCl}_3$ )  $\delta$  143.5 (C), 133.6 (C), 132.6 (C), 129.6 (CH), 127.7 (CH), 126.9 (C), 81.7 (C), 70.8 (CH), 68.7 (CH), 67.8 (CH), 66.0 (CH), 65.1 (C), 52.4 ( $\text{CH}_2$ ), 46.5 ( $\text{CH}_2$ ), 37.7 (CH), 33.0 ( $\text{CH}_2$ ), 32.8 ( $\text{CH}_2$ ), 27.0 ( $\text{CH}_2$ ), 26.1 ( $\text{CH}_2$ ), 25.9 ( $\text{CH}_2$ ), 21.5 ( $\text{CH}_3$ ). HRLCMS (ESI)  $m/z$ : [M] Calcd for  $\text{C}_{27}\text{H}_{31}\text{FeNO}_2\text{S}$  489.1420; Found 489.1420. The enantioselectivity of the product **3o** was determined by chiral HPLC analysis on OD-3 column (hexane: isopropanol = 93:7, 1 mL/min,  $\lambda=254$  nm).

### Racemic sample (30)

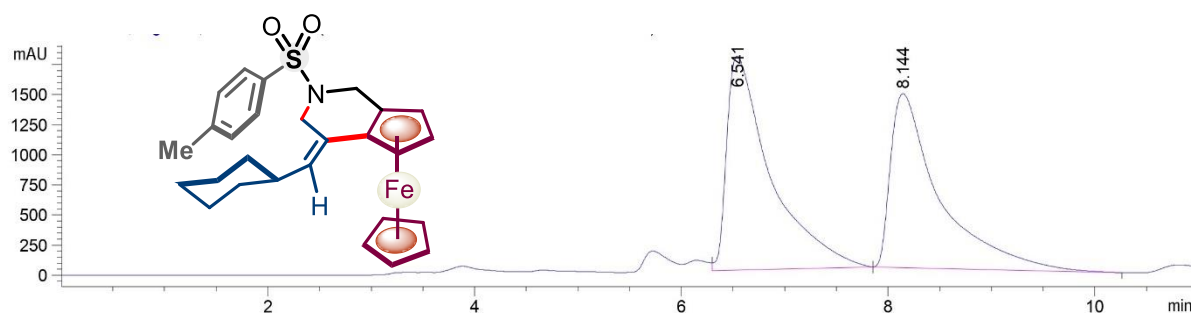

| Peak #   | RetTime [min] | Type | Width [min] | Area [mAU*s] | Height [mAU] | Area %  |
|----------|---------------|------|-------------|--------------|--------------|---------|
| 1        | 6.541         | VB   | 0.4279      | 5.23946e4    | 1777.49768   | 52.2900 |
| 2        | 8.144         | BB   | 0.4737      | 4.78054e4    | 1445.93958   | 47.7100 |
| Totals : |               |      |             | 1.00200e5    | 3223.43726   |         |

### Asymmetric sample (30)

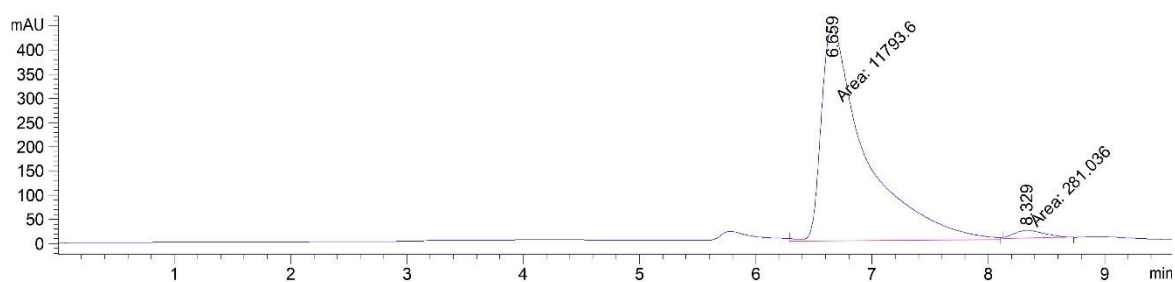

| Peak # | RetTime [min] | Type | Width [min] | Area [mAU*s] | Height [mAU] | Area %  |
|--------|---------------|------|-------------|--------------|--------------|---------|
| 1      | 6.659         | MM   | 0.4441      | 1.17936e4    | 442.61905    | 97.6725 |
| 2      | 8.329         | MM   | 0.3033      | 281.03629    | 15.44449     | 2.3275  |

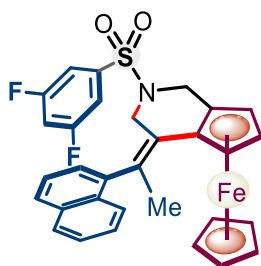

**Ferrocene fused tetrahydropyridine 3p** was purified on silica gel (mesh 230-400) in (hexanes: ethyl acetate; 95:5), obtained as an orange yellow solid, m.p: 125 °C-126 °C. Yield: 39 mg (47%, *E:Z* 1:10).  $^1\text{H}$  NMR (700 MHz,  $\text{CDCl}_3$ )  $\delta$  8.00 (s, 2H), 7.95 (s, 1H), 7.90 (d,  $J = 7.9$  Hz, 2H), 7.86 (d,  $J = 7.2$  Hz, 1H), 7.56 (dd,  $J = 13.5, 10.2$  Hz, 3H), 7.27 (s, 1H), 4.73 (d,  $J = 14.7$  Hz, 1H), 4.52 (s, 1H), 4.33 (d,  $J = 15.3$  Hz, 2H), 4.25 (s, 1H), 4.22 (s, 1H), 4.20 (s, 5H), 3.83 (d,  $J = 14.6$  Hz, 1H), 2.22 (s, 3H).  $^{13}\text{C}\{^1\text{H}\}$  NMR (176 MHz,  $\text{CDCl}_3$ )  $\delta$  141.4 (CH), 140.8 (CH), 133.8 (CH), 133.3 (CH), 132.5 (C), 132.4 (C), 132.2 (CH), 128.4 (CH), 127.9 (CF), 127.8 (CF), 127.5 (C), 126.6 (C), 126.5 (C), 126.1 (CH), 125.9 (CH), 125.0 (CH), 123.2 (C), 121.6 (C), 80.9 (C), 78.9 (CH), 70.4 (CH), 68.1 (CH), 66.8 (CH), 65.4 (C), 49.0 ( $\text{CH}_2$ ), 46.8 ( $\text{CH}_2$ ), 22.7 ( $\text{CH}_3$ ).  $^{19}\text{F}$  NMR (376 MHz,  $\text{CDCl}_3$ )  $\delta$  -116.90. HRLCMS (ESI)  $m/z$ : [M] Calcd for  $\text{C}_{31}\text{H}_{25}\text{F}_2\text{FeNO}_2\text{S}$  569.0923; Found 569.0930. The enantioselectivity of the product **3p** was determined by chiral HPLC analysis on IC-3 column (hexane: isopropanol = 85:15, 1 mL/min,  $\lambda=254$  nm).

### Racemic sample (3p)

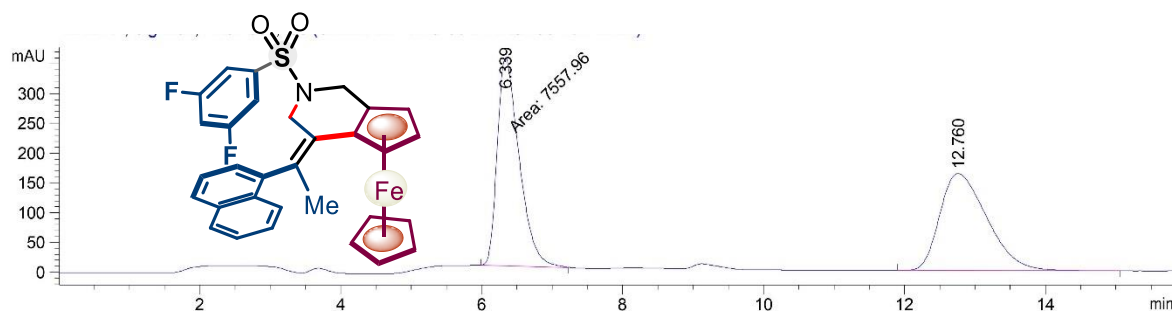

| Peak # | RetTime [min] | Type | Width [min] | Area [mAU*s] | Height [mAU] | Area %  |
|--------|---------------|------|-------------|--------------|--------------|---------|
| 1      | 6.339         | MM   | 0.3605      | 7557.95801   | 349.42419    | 49.9387 |
| 2      | 12.760        | BB   | 0.7388      | 7576.52490   | 162.85172    | 50.0613 |

### Asymmetric sample (3p)

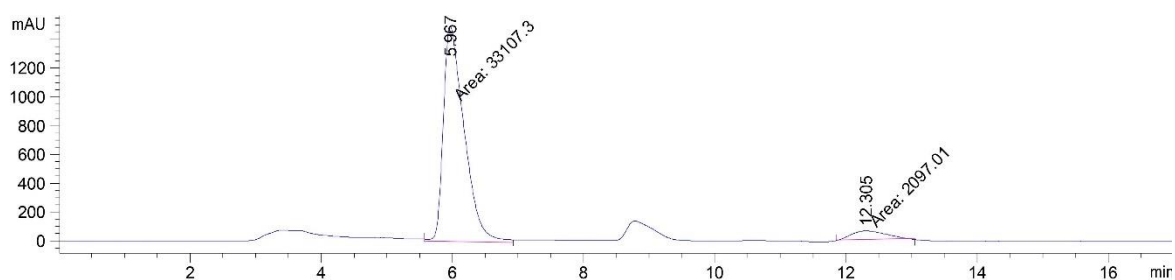

| Peak # | RetTime [min] | Type | Width [min] | Area [mAU*s] | Height [mAU] | Area %  |
|--------|---------------|------|-------------|--------------|--------------|---------|
| 1      | 5.967         | MM   | 0.3683      | 3.31073e4    | 1498.35449   | 94.0433 |
| 2      | 12.305        | MM   | 0.5925      | 2097.00830   | 58.98545     | 5.9567  |

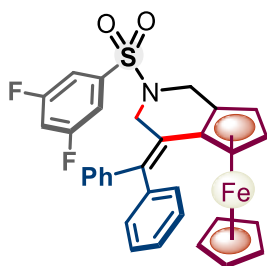

**Ferrocene fused tetrahydropyridine 3q** was purified on silica gel (mesh 230-400) in (hexanes: ethyl acetate; 95:5), obtained as an orange yellow solid, mp: 131 °C-132 °C. Yield: 38 mg (45%).  $^1\text{H}$  NMR (700 MHz,  $\text{CDCl}_3$ )  $\delta$  7.51 (d,  $J = 6.9$  Hz, 1H), 7.39 (dd,  $J = 9.2, 5.8$  Hz, 2H), 7.36 – 7.31 (m, 4H), 7.20 (d,  $J = 3.9$  Hz, 2H), 7.17 (d,  $J = 7.1$  Hz, 2H), 7.02 – 7.31 (m, 2H), 4.61 (d,  $J = 14.6$  Hz, 1H), 4.51 (d,  $J = 14.6$  Hz, 1H), 4.29 (d,  $J = 1.1$  Hz, 1H), 4.17 (s, 1H), 4.11 (s, 5H), 4.03 (d,  $J = 15.0$  Hz, 1H), 3.95 (t,  $J = 2.5$  Hz, 1H), 3.10 (d,  $J = 1.4$  Hz, 1H).  $^{13}\text{C}\{^1\text{H}\}$  NMR (176 MHz,  $\text{CDCl}_3$ )  $\delta$  162.7 (dd,  $J = 254.7, 11.7$  Hz CF), 142.5 (C), 141.4 ( $\text{CH}_2$ ), 137.5 ( $\text{CH}_2$ ), 129.3 ( $\text{CH}_2$ ), 129.1 ( $\text{CH}_2$ ), 128.5 ( $\text{CH}_2$ ), 128.3 ( $\text{CH}_2$ ), 128.0 (C), 127.5 ( $\text{CH}_2$ ), 127.3 (C), 127.2 (C), 110.8 (dd,  $J = 22.2, 5.6$  Hz C), 108.1 (t,  $J = 25.0$  Hz CH), 81.90 (C), 78.76 (CH), 70.65 (CH), 67.94 (CH), 66.19 (CH), 65.29 (C), 48.53 ( $\text{CH}_2$ ), 46.4 ( $\text{CH}_2$ ).  $^{19}\text{F}$  NMR (376 MHz,  $\text{CDCl}_3$ )  $\delta$  -105.64. HRLCMS (ESI)  $m/z$ : [M] Calcd for  $\text{C}_{32}\text{H}_{25}\text{FeF}_2\text{NO}_2\text{S}$  581.0918; Found 581.0933. The enantioselectivity of the product **3q** was determined by chiral HPLC analysis on AD-H column (hexane: isopropanol = 90:10, 1 mL/min,  $\lambda=254$  nm).

### Racemic sample (3q)

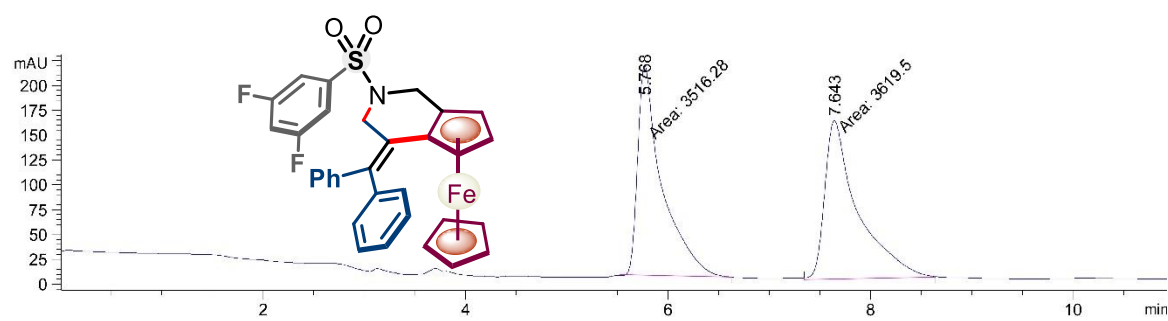

| Peak # | Ret Time [min] | Type | Width [min] | Area [mAU*s] | Height [mAU] | Area %  |
|--------|----------------|------|-------------|--------------|--------------|---------|
| 1      | 5.768          | MM   | 0.2770      | 3516.28027   | 211.53900    | 49.2767 |
| 2      | 7.643          | MM   | 0.3784      | 3619.50415   | 159.42012    | 50.7233 |

### Asymmetric sample (3q)

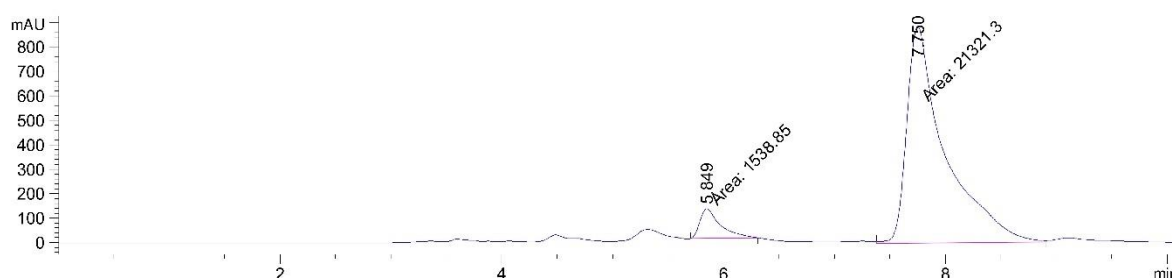

| Peak # | Ret Time [min] | Type | Width [min] | Area [mAU*s] | Height [mAU] | Area %  |
|--------|----------------|------|-------------|--------------|--------------|---------|
| 1      | 5.849          | MM   | 0.2129      | 1538.84717   | 120.47400    | 6.7316  |
| 2      | 7.750          | MM   | 0.4002      | 2.13213e4    | 887.90741    | 93.2684 |

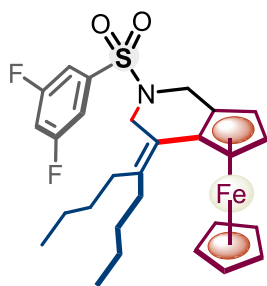

**Ferrocene fused tetrahydropyridine 3r** was purified on silica gel (mesh 230-400) in (hexanes: ethyl acetate; 95:5), obtained as an orange yellow solid, mp: 120 °C-120 °C. Yield: 35 mg (45%).  $^1\text{H}$  NMR (400 MHz,  $\text{CDCl}_3$ )  $\delta$  7.32 (d,  $J = 4.3$  Hz, 2H), 7.01 (tt,  $J = 8.4, 2.2$  Hz, 1H), 4.55 (d,  $J = 13.9$  Hz, 1H), 4.44 (d,  $J = 13.7$  Hz, 1H), 4.31 (s, 1H), 4.24 (s, 1H), 4.16 (t,  $J = 2.4$  Hz, 1H), 4.06 (s, 5H), 3.85 (d,  $J = 13.9$  Hz, 1H), 3.64 (d,  $J = 13.7$  Hz, 1H), 2.33 – 1.98 (m, 4H), 1.55 – 1.37 (m, 8H), 1.02 (t,  $J = 7.0$  Hz, 6H).  $^{13}\text{C}\{^1\text{H}\}$  NMR (176 MHz,  $\text{CDCl}_3$ )  $\delta$  162.7 (dd,  $J = 254.6, 11.6$  Hz, CF), 140.9 (t,  $J = 8.0$  Hz, C), 138.4 (CH), 121.9 (CH), 110.9 (dd,  $J = 22.3, 5.7$  Hz, C), 108.1 (t,  $J = 25.1$  Hz, C), 80.8 (C), 79.2 (CH), 70.5 (CH), 67.5 (CH), 66.3 (CH), 64.9 (C), 47.2 ( $\text{CH}_2$ ), 46.5 ( $\text{CH}_2$ ), 34.0 ( $\text{CH}_2$ ), 33.7 ( $\text{CH}_2$ ), 31.0 ( $\text{CH}_2$ ), 30.4 ( $\text{CH}_2$ ), 23.3 ( $\text{CH}_2$ ), 23.0 ( $\text{CH}_2$ ), 14.2 ( $\text{CH}_3$ ), 14.0 ( $\text{CH}_3$ ).  $^{19}\text{F}$  NMR (376 MHz,  $\text{CDCl}_3$ )  $\delta$  -105.86. HRLCMS (ESI)  $m/z$ : [M] Calcd for  $\text{C}_{28}\text{H}_{33}\text{FeF}_2\text{NO}_2\text{S}$  541.1544; Found 541.1588. The enantioselectivity of the product **3r** was determined by chiral HPLC analysis on OD-3 column (hexane: isopropanol = 90:10, 1 mL/min,  $\lambda=254$  nm).



### Racemic sample (3r)

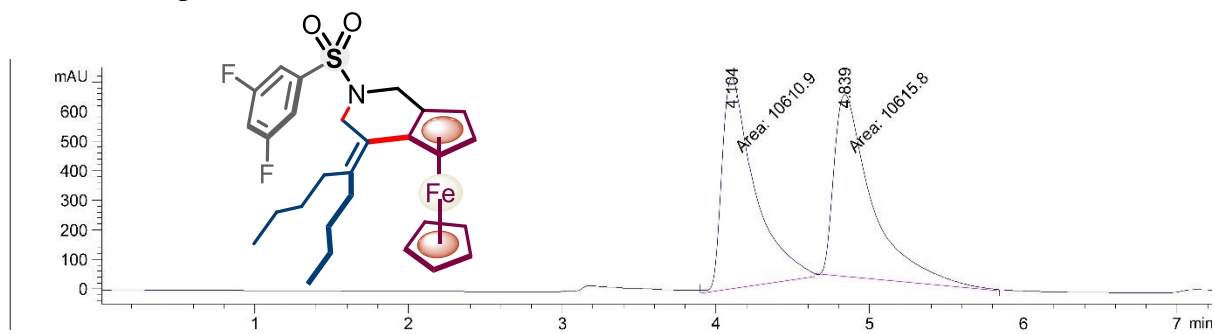

| Peak # | Ret Time [min] | Type | Width [min] | Area [mAU*s] | Height [mAU] | Area %  |
|--------|----------------|------|-------------|--------------|--------------|---------|
| 1      | 4.104          | MM   | 0.2477      | 1.06109e4    | 713.99713    | 49.9886 |
| 2      | 4.839          | MM   | 0.2870      | 1.06158e4    | 616.41479    | 50.0114 |

### Asymmetric sample (3r)

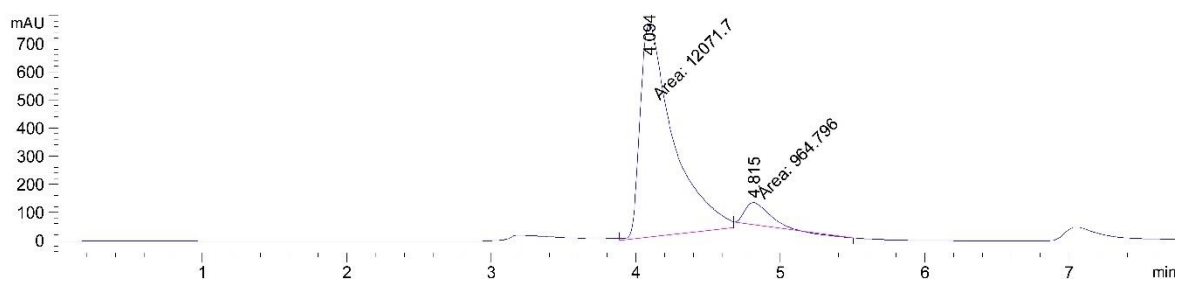

| Peak # | Ret Time [min] | Type | Width [min] | Area [mAU*s] | Height [mAU] | Area %  |
|--------|----------------|------|-------------|--------------|--------------|---------|
| 1      | 4.094          | MM   | 0.2659      | 1.20717e4    | 756.68420    | 92.5993 |
| 2      | 4.815          | MM   | 0.2027      | 964.79559    | 79.30970     | 7.4007  |

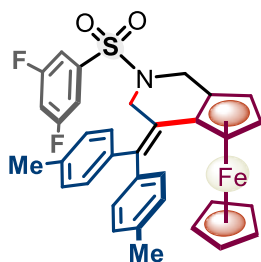

**Ferrocene fused tetrahydropyridine 3s** was purified on silica gel (mesh 230-400) in (hexanes: ethyl acetate; 90:10), obtained as an orange red solid, mp: 135 °C;  $[\alpha]_{\text{D}}^{25} = +41$  ( $\text{CHCl}_3$ ,  $c = 0.12$ ). Yield: 43 mg (50%).  $^1\text{H NMR}$  (700 MHz,  $\text{CDCl}_3$ )  $\delta$  7.18 (d,  $J = 7.8$  Hz, 4H), 7.13 (d,  $J = 6.4$  Hz, 2H), 7.01 (d,  $J = 7.6$  Hz, 3H), 6.87 (s, 2H), 4.47 (d,  $J = 14.4$  Hz, 2H), 4.37 (s, 1H), 4.17 (s, 5H), 4.14 (d,  $J = 14.7$  Hz, 2H), 4.01 (s, 1H), 3.26 (s, 1H), 2.40 (s, 3H), 2.38 (s, 3H).  $^{13}\text{C}\{^1\text{H}\}$  NMR (176 MHz,  $\text{CDCl}_3$ )  $\delta$  162.7 (dd,  $J = 254.6, 11.5$  Hz CF), 141.9 (t,  $J = 8.0$  Hz C), 139.5 (C), 138.6 (C), 137.9 (C), 137.2 (C), 136.9 (C), 129.3 (CH), 129.2 (CH), 126.4 (C), 110.9 (dd,  $J = 22.2, 5.6$  Hz CH), 108.1 (t,  $J = 25.0$  Hz, CH), 82.1 (C), 80.1 (C), 71.2 (CH), 68.4 (CH), 66.4 (CH), 65.5 (CH), 48.6 ( $\text{CH}_2$ ), 46.5 ( $\text{CH}_2$ ), 21.3 ( $\text{CH}_3$ ), 21.2 ( $\text{CH}_3$ ).  $^{19}\text{F NMR}$  (376 MHz,  $\text{CDCl}_3$ )  $\delta$  -105.73. HRLCMS (ESI)  $m/z$ : [M] Calcd for  $\text{C}_{34}\text{H}_{29}\text{FeF}_2\text{NO}_2\text{S}$  609.1231; Found 609.1234. The enantioselectivity of the product **3s** was determined by chiral HPLC analysis on OD-3 column (hexane: isopropanol = 85:15, 1 mL/min,  $\lambda = 254$  nm).

### Racemic sample (3s)

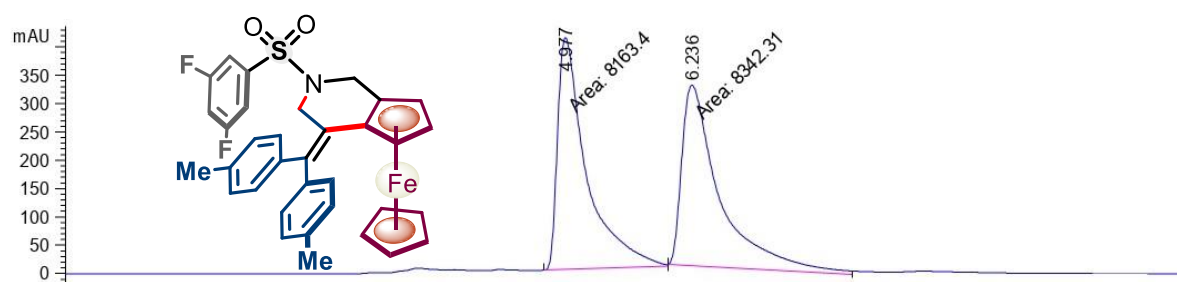

| Peak # | RetTime [min] | Type | Width [min] | Area [mAU*s] | Height [mAU] | Area %  |
|--------|---------------|------|-------------|--------------|--------------|---------|
| 1      | 4.977         | MM   | 0.3325      | 8163.40039   | 409.25189    | 49.4581 |
| 2      | 6.236         | MM   | 0.4361      | 8342.30566   | 318.83063    | 50.5419 |

### Asymmetric sample (3s)

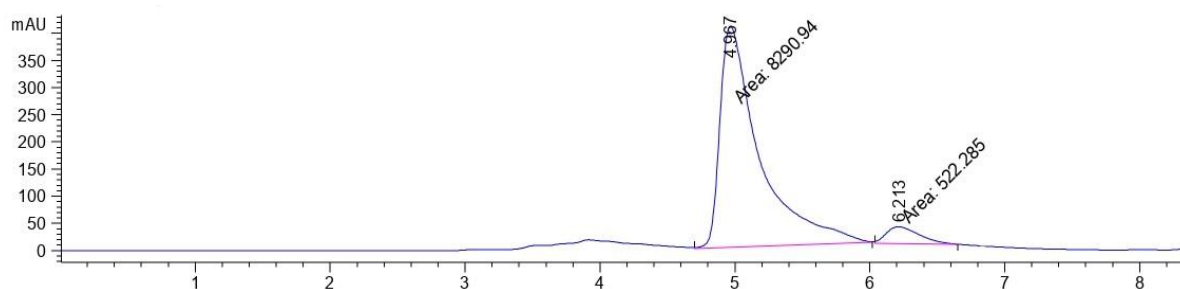

| Peak # | RetTime [min] | Type | Width [min] | Area [mAU*s] | Height [mAU] | Area %  |
|--------|---------------|------|-------------|--------------|--------------|---------|
| 1      | 4.967         | MM   | 0.3391      | 8290.93750   | 407.44418    | 94.0738 |
| 2      | 6.213         | MM   | 0.2845      | 522.28479    | 30.59200     | 5.9262  |

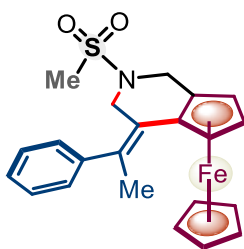

**Ferrocene fused tetrahydropyridine 3t** was purified on silica gel (mesh 230-400) in (hexanes: ethyl acetate; 85:15), obtained as an orange yellow solid, mp: 113 °C-114 °C. Yield: 25 mg (42%, *E:Z* 1:10).  $^1\text{H}$  NMR (700 MHz,  $\text{CDCl}_3$ )  $\delta$  7.41 (t,  $J = 7.1$  Hz, 2H), 7.34 – 7.30 (m, 1H), 7.21 (d,  $J = 7.0$  Hz, 2H), 4.67 (brs, 2H), 4.65 (d,  $J = 14.7$  Hz, 1H), 4.31 – 4.27 (m, 2H), 4.19 (s, 5H), 4.09 (d,  $J = 14.5$  Hz, 1H), 3.68 (d,  $J = 14.0$  Hz, 1H), 2.69 (s, 3H), 2.32 (s, 3H).  $^{13}\text{C}\{^1\text{H}\}$  NMR (176 MHz,  $\text{CDCl}_3$ )  $\delta$  143.8 (C), 133.5 (CH), 128.6 (CH), 128.0 (CH), 127.0 (C), 125.6 (C), 81.9 (C), 70.5 (CH), 67.9 (CH), 67.8 (CH), 66.8 (CH), 65.3 (C), 48.4 (CH<sub>2</sub>), 46.2 (CH<sub>2</sub>), 36.6 (CH<sub>3</sub>), 22.9 (CH<sub>3</sub>). HRLCMS (ESI)  $m/z$ :  $[\text{M-H}]^+$  Calcd for  $\text{C}_{22}\text{H}_{22}\text{FeNO}_2\text{S}$  420.0715; Found 420.0693. The enantioselectivity of the product **3t** was determined by chiral HPLC analysis on OZ-3 column (hexane: isopropanol = 85:15, 1 mL/min,  $\lambda=254$  nm).

### Racemic sample (3t)

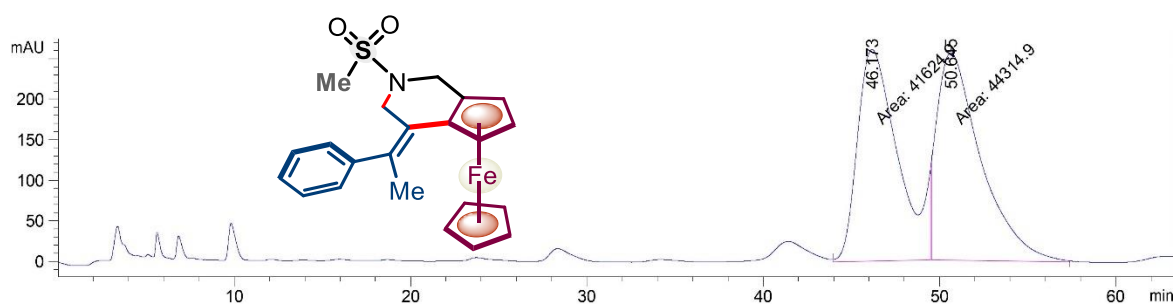

| Peak # | RetTime [min] | Type | Width [min] | Area [mAU*s] | Height [mAU] | Area %  |
|--------|---------------|------|-------------|--------------|--------------|---------|
| 1      | 46.173        | MM   | 2.6581      | 4.16249e4    | 260.99533    | 48.4350 |
| 2      | 50.645        | MM   | 2.8888      | 4.43149e4    | 255.67107    | 51.5650 |

### Asymmetric sample (3t)

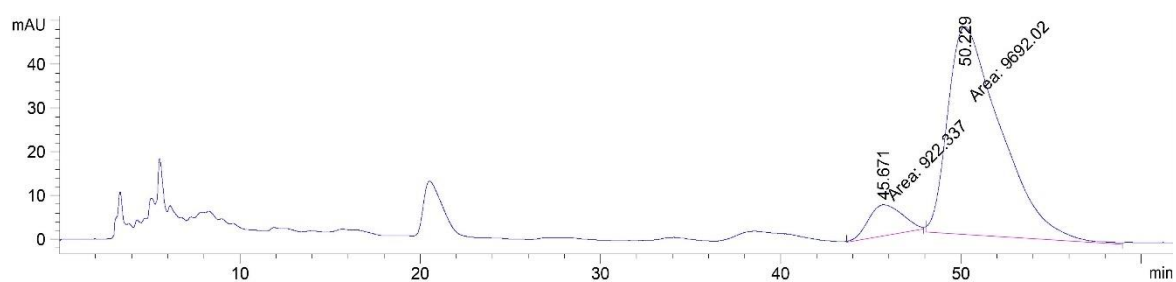

| Peak # | RetTime [min] | Type | Width [min] | Area [mAU*s] | Height [mAU] | Area %  |
|--------|---------------|------|-------------|--------------|--------------|---------|
| 1      | 45.671        | MM   | 2.1561      | 922.33679    | 7.12954      | 8.6895  |
| 2      | 50.229        | MM   | 3.4045      | 9692.01660   | 47.44727     | 91.3105 |

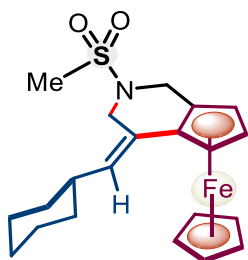

**Ferrocene fused tetrahydropyridine 3u** was purified on silica gel (mesh 230-400) in (hexanes: ethyl acetate; 85:15), obtained as an orange yellow solid, mp: 109 °C-110 °C. Yield: 23 mg (38%, *E:Z* 1:4). <sup>1</sup>H NMR (400 MHz, CDCl<sub>3</sub>) δ 5.38 (d, *J* = 9.2 Hz, 1H), 4.60 (d, *J* = 15.3 Hz, 1H), 4.50 (s, 1H), 4.33 (s, 1H), 4.28 (d, *J* = 4.0 Hz, 1H), 4.24 (d, *J* = 9.6 Hz, 1H), 4.11 (s, 5H), 4.08 – 4.03 (m, 1H), 3.93 (d, *J* = 14.2 Hz, 1H), 2.72 (s, 3H), 2.53 (dd, *J* = 19.4, 10.1 Hz, 1H), 1.87 (t, *J* = 12.2 Hz, 2H), 1.23 (d, *J* = 5.8 Hz, 8H). <sup>13</sup>C{<sup>1</sup>H} NMR (176 MHz, CDCl<sub>3</sub>) δ 132.8 (C), 126.7 (C), 81.8 (C), 77.9 (CH), 70.7 (CH), 67.9 (CH), 65.6 (CH), 65.2 (C), 52.2 (CH<sub>2</sub>), 46.2 (CH<sub>2</sub>), 37.5 (CH), 37.1 (CH<sub>2</sub>), 32.9 (CH<sub>2</sub>), 32.8 (CH<sub>2</sub>), 26.0 (CH<sub>2</sub>), 25.9 (CH<sub>2</sub>), 25.7 (CH<sub>3</sub>). HRLCMS (ESI) *m/z*: [M] Calcd for C<sub>21</sub>H<sub>27</sub>FeNO<sub>2</sub>S 413.1107; Found 413.1096. The enantioselectivity of the product **3u** was determined by chiral HPLC analysis on AD-3 column (hexane: isopropanol = 80:20, 1 mL/min, λ=254 nm).

### Racemic sample (3u)

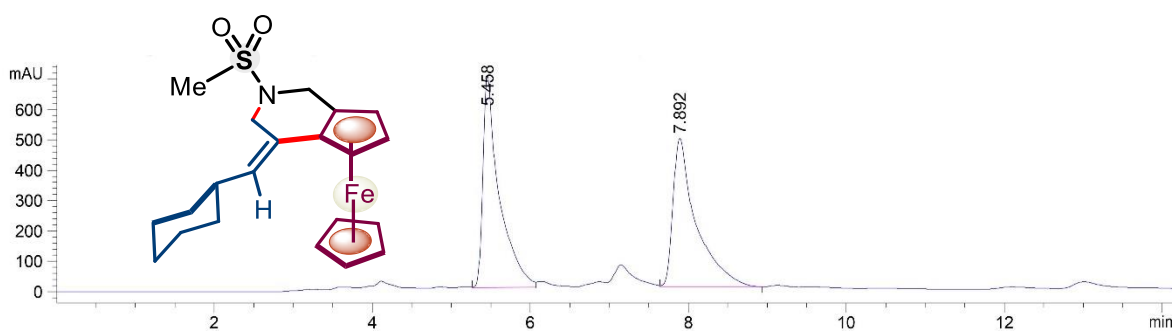

| Peak # | RetTime [min] | Type | Width [min] | Area [mAU*s] | Height [mAU] | Area %  |
|--------|---------------|------|-------------|--------------|--------------|---------|
| 1      | 5.458         | VV   | 0.2002      | 1.00683e4    | 698.32629    | 50.1783 |
| 2      | 7.892         | VB   | 0.2843      | 9996.71289   | 489.47974    | 49.8217 |

### Asymmetric sample (3u)

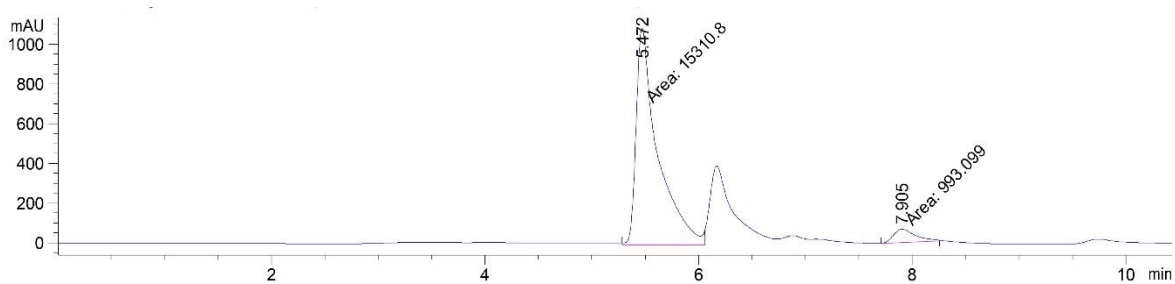

| Peak # | RetTime [min] | Type | Width [min] | Area [mAU*s] | Height [mAU] | Area %  |
|--------|---------------|------|-------------|--------------|--------------|---------|
| 1      | 5.472         | MM   | 0.2332      | 1.53108e4    | 1094.21545   | 93.9088 |
| 2      | 7.905         | MM   | 0.2415      | 993.09906    | 68.53255     | 6.0912  |

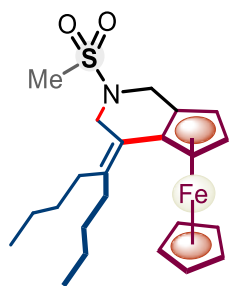

**Ferrocene fused tetrahydropyridine 3v** was purified on silica gel (mesh 230-400) in (hexanes: ethyl acetate; 85:15), obtained as an orange yellow solid, mp: 112 °C-113 °C. Yield: 22 mg (35%).  $^1\text{H}$  NMR (400 MHz,  $\text{CDCl}_3$ )  $\delta$  4.50 (brs, 2H), 4.34 (d,  $J = 14.1$  Hz, 2H), 4.28 (s, 1H), 4.17 (s, 1H), 4.13 (brs, 6H), 2.70 (s, 3H), 2.2 – 1.6 (m, 4H), 1.53 – 1.38 (m, 8H), 1.06 – 0.95 (m, 6H).  $^{13}\text{C}\{^1\text{H}\}$  NMR (176 MHz,  $\text{CDCl}_3$ )  $\delta$  138.2 (C), 122.3 (C), 81.4 (C), 70.5 (CH), 68.7 (CH), 67.5 (CH), 66.1 (CH), 65.0 (C), 46.9 ( $\text{CH}_2$ ), 46.3 ( $\text{CH}_2$ ), 36.7 ( $\text{CH}_3$ ), 34.0 ( $\text{CH}_2$ ), 33.8 ( $\text{CH}_2$ ), 31.2 ( $\text{CH}_2$ ), 30.5 ( $\text{CH}_2$ ), 23.3 ( $\text{CH}_2$ ), 23.0 ( $\text{CH}_2$ ), 14.2 ( $\text{CH}_3$ ), 14.0 ( $\text{CH}_3$ ). HRLCMS (ESI)  $m/z$ :  $[\text{M}+\text{Na}]^+$  Calcd for  $\text{C}_{23}\text{H}_{33}\text{FeNO}_2\text{SNa}$  466.1474; Found 466.1462. The enantioselectivity of the product **3v** was determined by chiral HPLC analysis on OZ-3 column (hexane: isopropanol = 85: 15, 1 mL/min,  $\lambda=254$  nm).



### Racemic sample (3v)

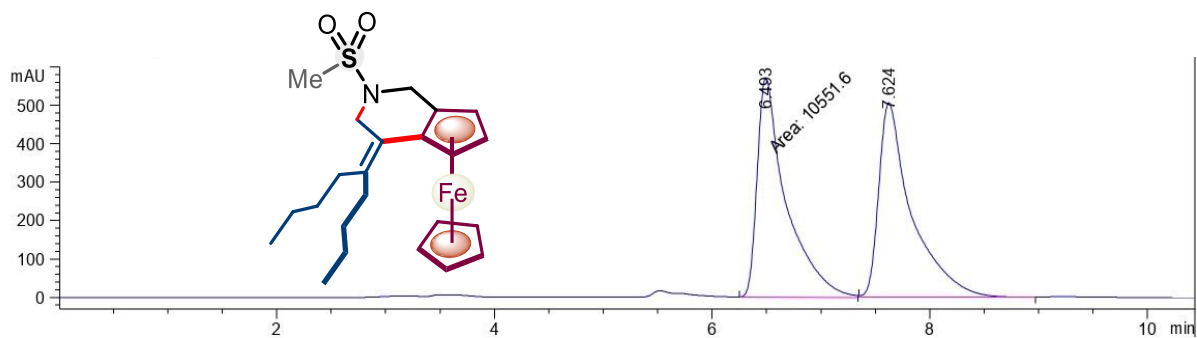

| Peak # | RetTime [min] | Type | Width [min] | Area [mAU*s] | Height [MAU] | Area %  |
|--------|---------------|------|-------------|--------------|--------------|---------|
| 1      | 6.493         | MM   | 0.3074      | 1.05516e4    | 572.00067    | 49.8391 |
| 2      | 7.624         | VB   | 0.2949      | 1.06197e4    | 505.84946    | 50.1609 |

### Asymmetric sample (3v)

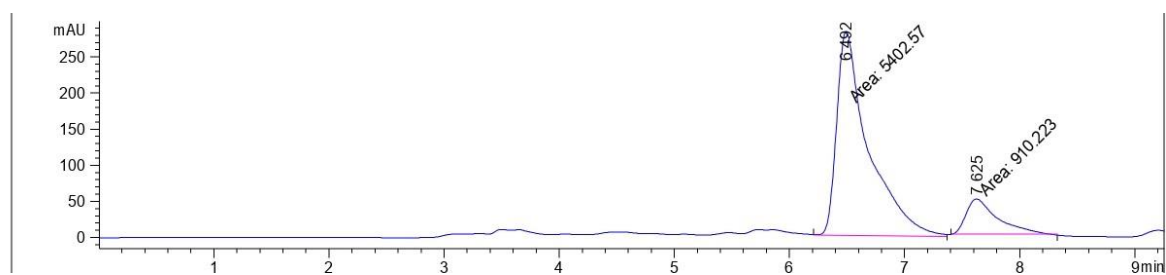

| Peak # | RetTime [min] | Type | Width [min] | Area [mAU*s] | Height [MAU] | Area %  |
|--------|---------------|------|-------------|--------------|--------------|---------|
| 1      | 6.492         | MM   | 0.3185      | 5402.57031   | 282.68707    | 85.5813 |
| 2      | 7.625         | MM   | 0.3141      | 910.22327    | 48.29060     | 14.4187 |

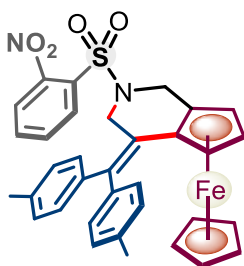

**Ferrocene fused tetrahydropyridine 3w** was purified on silica gel (mesh 230-400) in (hexanes: ethyl acetate; 80:20), obtained as an orange yellow solid, mp: 140 °C-141 °C. Yield: 25 mg (28%).  $^1\text{H}$  NMR (400 MHz,  $\text{CDCl}_3$ )  $\delta$  7.74 (dd,  $J = 7.9, 1.1$  Hz, 1H), 7.68 – 7.53 (m, 3H), 7.15 (dd,  $J = 15.2, 7.7$  Hz, 4H), 7.03 (d,  $J = 8.0$  Hz, 2H), 6.96 – 6.87 (m, 2H), 4.70 (d,  $J = 15.1$  Hz, 1H), 4.59 (d,  $J = 14.7$  Hz, 1H), 4.42 (d,  $J = 15.1$  Hz, 1H), 4.32 (d,  $J = 1.1$  Hz, 1H), 4.19 (d,  $J = 6.2$  Hz, 1H), 4.13 (s, 5H), 3.97 (t,  $J = 2.5$  Hz, 1H), 3.21 (dd,  $J = 2.4, 1.0$  Hz, 1H), 2.39 (s, 3H), 2.38 (s, 3H).  $^{13}\text{C}\{^1\text{H}\}$  NMR (176 MHz,  $\text{CDCl}_3$ )  $\delta$  148.1 (C), 139.8 (C), 138.9 (C), 137.3 (CH), 137.0 (CH), 136.9 (C), 133.2 (C), 132.9 (CH), 131.6 (CH), 131.1 (CH), 129.4 (CH), 129.3 (CH), 129.2 (CH), 129.0 (CH), 126.9 (C), 124.0 (C), 82.9 (C), 79.4 (C), 70.5 (CH), 67.7 (CH), 66.2 (CH), 65.0 (CH), 48.4 ( $\text{CH}_2$ ), 46.5 ( $\text{CH}_2$ ), 21.3 ( $\text{CH}_3$ ), 21.2 ( $\text{CH}_3$ ). HRLCMS (ESI)  $m/z$ : [M] Calcd for  $\text{C}_{34}\text{H}_{30}\text{FeN}_2\text{O}_4\text{S}$  618.1271; Found 618.1245. The enantioselectivity of the product **3w** was determined by chiral HPLC analysis on IC-3 column (hexane: isopropanol = 93:7, 1 mL/min,  $\lambda=254$  nm).

Racemic sample (3w)

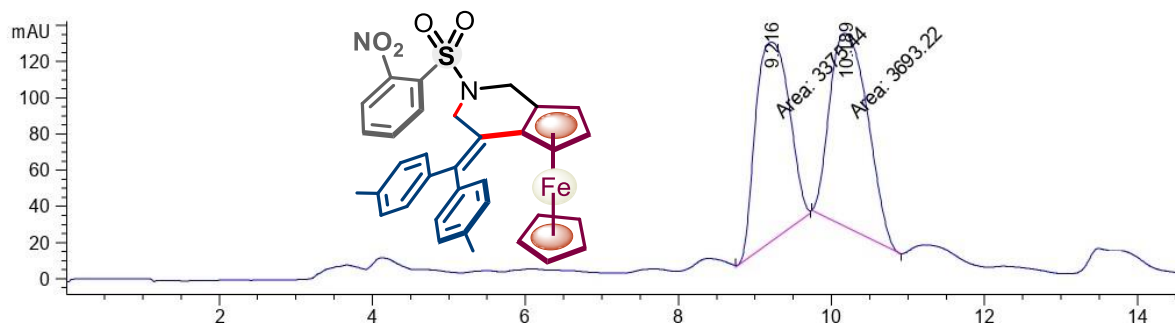

| Peak # | RetTime [min] | Type | Width [min] | Area [mAU*s] | Height [mAU] | Area %  |
|--------|---------------|------|-------------|--------------|--------------|---------|
| 1      | 9.216         | MM   | 0.5105      | 3375.43848   | 110.19186    | 47.7522 |
| 2      | 10.189        | MM   | 0.5771      | 3693.21875   | 106.66720    | 52.2478 |

Asymmetric sample (3w)

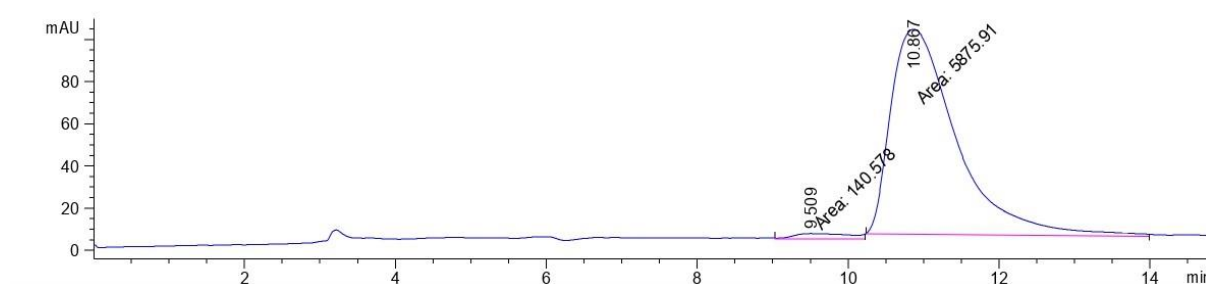

| Peak # | RetTime [min] | Type | Width [min] | Area [mAU*s] | Height [mAU] | Area %  |
|--------|---------------|------|-------------|--------------|--------------|---------|
| 1      | 9.509         | MM   | 0.8835      | 140.57751    | 2.65192      | 2.3365  |
| 2      | 10.867        | MM   | 1.0066      | 5875.90918   | 97.29389     | 97.6635 |

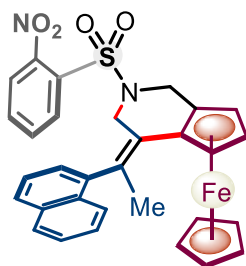

**Ferrocene fused tetrahydropyridine 3x** was purified on silica gel (mesh 230-400) in (hexanes: ethyl acetate; 85:15), obtained as an orange yellow solid, mp: 135 °C-135 °C. Yield: 26 mg (31%, *E:Z* 1:3).  $^1\text{H}$  NMR (400 MHz,  $\text{CDCl}_3$ )  $\delta$  7.92 – 7.85 (m, 3H), 7.68 (s, 1H), 7.53 (q,  $J = 5.5$  Hz, 5H), 7.39 (d,  $J = 8.3$  Hz, 1H), 4.84 (d,  $J = 14.8$  Hz, 1H), 4.66 (d,  $J = 1.5$  Hz, 1H), 4.41 – 4.35 (m, 1H), 4.31 (t,  $J = 2.5$  Hz, 1H), 4.28 (s, 5H), 4.21 – 4.18 (m, 1H), 4.12 (s, 1H), 3.44 (dd,  $J = 14.4, 1.3$  Hz, 1H), 2.42 (s, 3H).  $^{13}\text{C}\{^1\text{H}\}$  NMR (176 MHz,  $\text{CDCl}_3$ )  $\delta$  147.8 (C), 141.4 (C), 133.5 (C), 133.3 (C), 133.2 (CH), 132.3 (CH), 132.2 (CH), 131.4 (CH), 130.8 (CH), 128.0 (CH), 127.9 (CH), 127.7 (CH), 126.7 (CH), 126.2 (CH), 126.0 (CH), 125.9 (CH), 125.7 (CH), 125.6 (CH), 124.0 (CH), 123.6 (C), 82.1 (C), 78.9 (C), 70.6 (CH), 67.9 (CH), 67.0 (CH), 65.1 (CH), 47.9 ( $\text{CH}_2$ ), 46.4 ( $\text{CH}_2$ ), 22.9 ( $\text{CH}_3$ ). HRLCMS (ESI)  $m/z$ : [M] Calcd for  $\text{C}_{31}\text{H}_{26}\text{FeN}_2\text{O}_4\text{S}$  578.0958; Found 578.0936. The enantioselectivity of the product **3x** was determined by chiral HPLC analysis on AD-H column (hexane: isopropanol = 85:15, 1 mL/min,  $\lambda=254$  nm).

Racemic sample (3x)

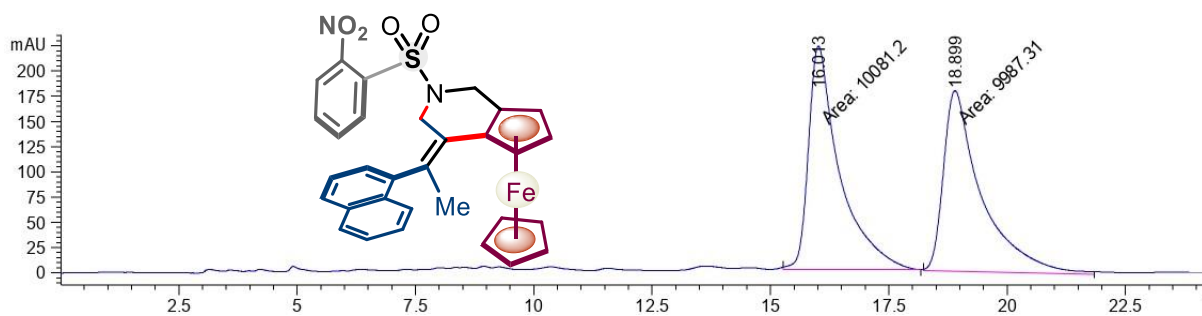

| Peak # | RetTime [min] | Type | Width [min] | Area [mAU*s] | Height [mAU] | Area %  |
|--------|---------------|------|-------------|--------------|--------------|---------|
| 1      | 4.977         | MM   | 0.3325      | 8163.40039   | 409.25189    | 49.4581 |
| 2      | 6.236         | MM   | 0.4361      | 8342.30566   | 318.83063    | 50.5419 |

Asymmetric sample (3x)

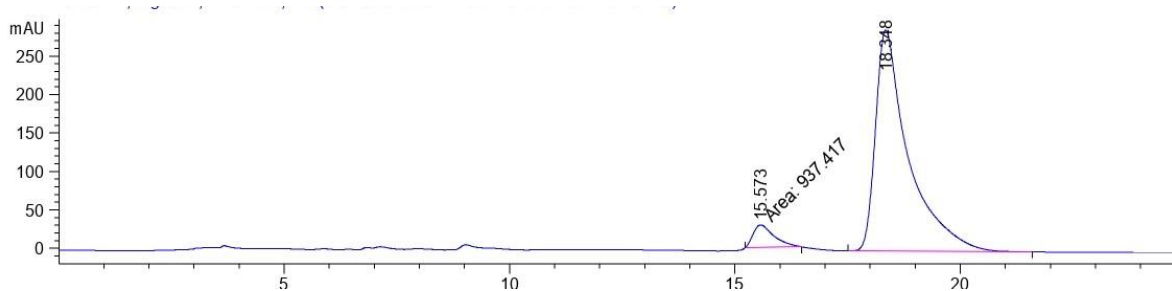

| Peak # | RetTime [min] | Type | Width [min] | Area [mAU*s] | Height [mAU] | Area %  |
|--------|---------------|------|-------------|--------------|--------------|---------|
| 1      | 15.573        | MM   | 0.5321      | 937.41718    | 29.36063     | 6.0381  |
| 2      | 18.348        | BB   | 0.7153      | 1.45876e4    | 287.84317    | 93.9619 |

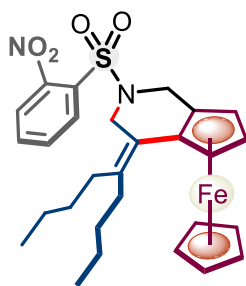

**Ferrocene fused tetrahydropyridine 3y** was purified on silica gel (mesh 230-400) in (hexanes: ethyl acetate; 90:10), obtained as an orange yellow solid, mp: 122 °C-123 °C. Yield: 27 mg (34%).  $^1\text{H}$  NMR (400 MHz,  $\text{CDCl}_3$ )  $\delta$  8.03 – 7.97 (m, 1H), 7.73 – 7.68 (m, 2H), 7.68 – 7.61 (m, 1H), 4.68 (d,  $J = 14.1$  Hz, 1H), 4.59 (d,  $J = 14.1$  Hz, 1H), 4.37 (s, 1H), 4.29 (s, 1H), 4.19 (s, 1H), 4.11 (s, 5H), 4.02 (d,  $J = 14.1$  Hz, 1H), 3.66 (d,  $J = 14.0$  Hz, 1H), 2.61 – 2.49 (m, 1H), 2.09 – 2.16 (m, 3H), 1.56 – 1.40 (m, 8H), 1.03 – 0.9 (m, 6H).  $^{13}\text{C}\{^1\text{H}\}$  NMR (176 MHz,  $\text{CDCl}_3$ )  $\delta$  148.5 (C), 138.5 (C), 133.5 (CH), 131.9 (C), 131.5 (CH), 130.6 ( $\text{CH}_3$ ), 124.1 (CH), 122.1 (C), 81.3 (C), 79.2 (C), 70.5 (CH), 67.5 (CH), 66.4 (CH), 64.9 (CH), 46.8 ( $\text{CH}_2$ ), 46.4 ( $\text{CH}_2$ ), 34.0 ( $\text{CH}_2$ ), 33.8 ( $\text{CH}_2$ ), 31.0 ( $\text{CH}_2$ ), 30.6 ( $\text{CH}_2$ ), 23.4 ( $\text{CH}_2$ ), 23.1 ( $\text{CH}_2$ ), 14.3 ( $\text{CH}_3$ ), 14.1 ( $\text{CH}_3$ ). HRLCMS (ESI)  $m/z$ : [M] Calcd for  $\text{C}_{28}\text{H}_{34}\text{FeN}_2\text{O}_4\text{S}$  550.1584; Found 550.1580. The enantioselectivity of the product **3y** was determined by chiral HPLC analysis on AD-H column (hexane: isopropanol = 90:10, 1 mL/min,  $\lambda=254$  nm).

Racemic sample (3y)

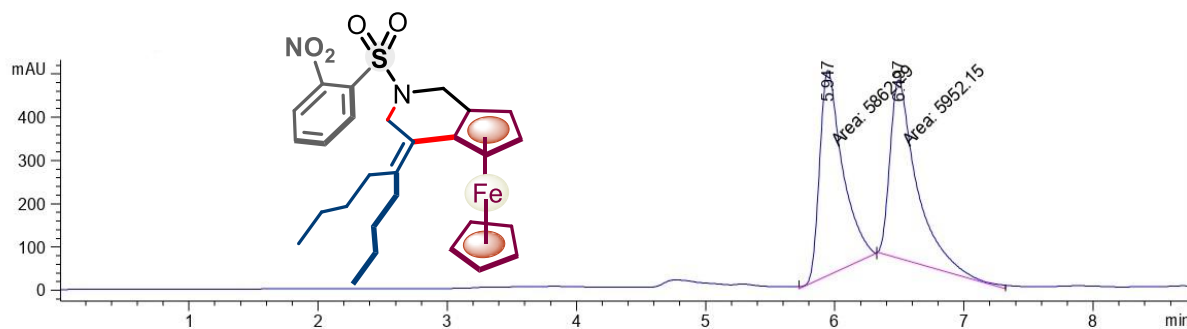

| Peak # | RetTime [min] | Type | Width [min] | Area [mAU*s] | Height [mAU] | Area %  |
|--------|---------------|------|-------------|--------------|--------------|---------|
| 1      | 5.947         | MM   | 0.2057      | 5862.28711   | 474.99173    | 49.6197 |
| 2      | 6.497         | MM   | 0.2411      | 5952.14551   | 411.41379    | 50.3803 |

Asymmetric sample (3y)

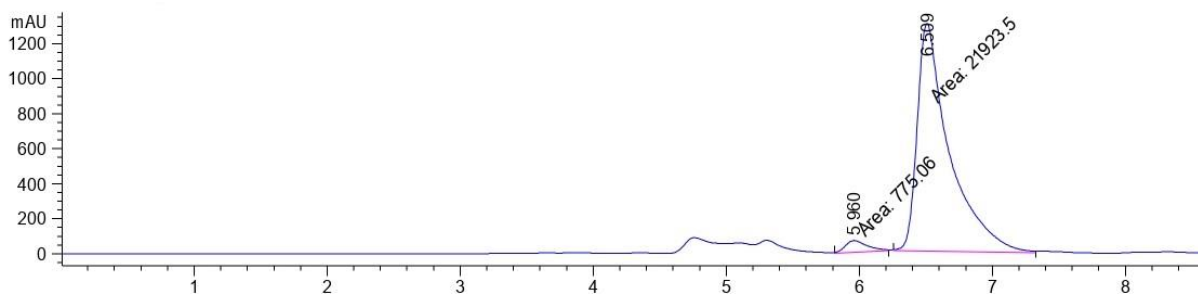

| Peak # | RetTime [min] | Type | Width [min] | Area [mAU*s] | Height [mAU] | Area %  |
|--------|---------------|------|-------------|--------------|--------------|---------|
| 1      | 5.960         | MM   | 0.1901      | 775.06006    | 67.94447     | 3.4146  |
| 2      | 6.509         | MM   | 0.2807      | 2.19235e4    | 1301.77283   | 96.5854 |

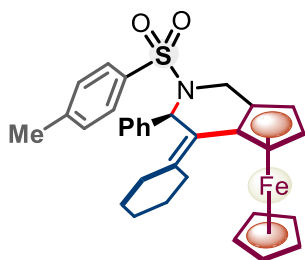

**Ferrocene fused tetrahydropyridine 3z** was purified on silica gel (mesh 230-400) in (hexanes: ethyl acetate; 85:15), obtained as an orange yellow solid, mp: 145 °C-146 °C. Yield: 46 mg (58%).  $^1\text{H}$  NMR (400 MHz,  $\text{CDCl}_3$ )  $\delta$  7.89 (d,  $J = 8.2$  Hz, 2H), 7.37 (d,  $J = 8.0$  Hz, 2H), 7.21 – 7.13 (m, 3H), 7.11 – 7.05 (m, 2H), 6.27 (s, 1H), 4.62 (d,  $J = 15.6$  Hz, 1H), 4.24 (s, 1H), 4.08 (t,  $J = 2.4$  Hz, 1H), 4.01 (s, 1H), 3.84 (s, 5H), 3.78 (d,  $J = 15.6$  Hz, 1H), 2.97 – 2.77 (m, 2H), 2.44 (s, 3H), 2.40 (dd,  $J = 7.6, 3.7$  Hz, 1H), 2.28 (dd,  $J = 8.8, 4.5$  Hz, 1H), 1.82 – 1.68 (m, 6H).  $^{13}\text{C}\{^1\text{H}\}$  NMR (176 MHz,  $\text{CDCl}_3$ )  $\delta$  143.3 (C), 138.7 (C), 138.6 (C), 137.7 (C), 129.6 (CH), 128.4 (CH), 127.5 (CH), 127.2 (CH), 127.1 (CH), 121.8 (C), 80.5 (C), 79.8 (C), 70.6 (CH), 69.9 (CH), 67.5 (CH), 63.2 (CH), 56.4 ( $\text{CH}_2$ ), 41.5 (C), 31.8 ( $\text{CH}_2$ ), 31.3 ( $\text{CH}_2$ ), 28.5 ( $\text{CH}_2$ ), 28.3 ( $\text{CH}_2$ ), 26.7 ( $\text{CH}_2$ ), 21.5 ( $\text{CH}_3$ ). HRLCMS (ESI)  $m/z$ : [M] Calcd for  $\text{C}_{32}\text{H}_{33}\text{FeNO}_2\text{S}$  551.1576; Found 551.1587.



**Scheme S3.** General procedure for the Pd-catalyzed alkenylation of ferrocenyl secondary amines with olefins

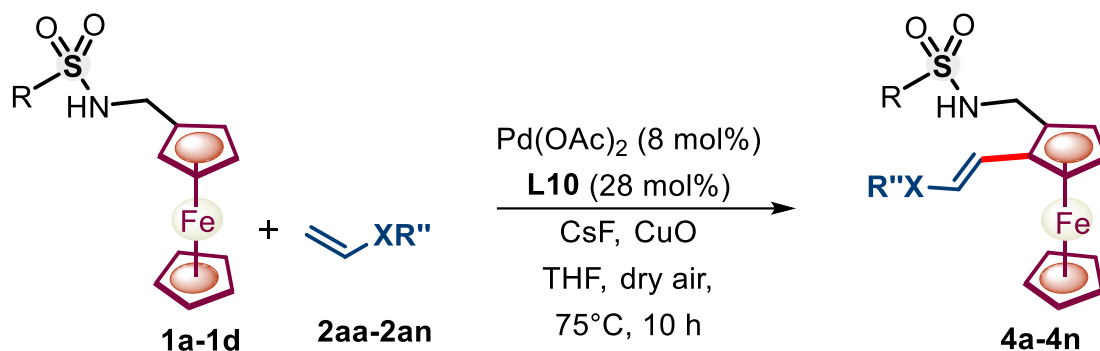

In a Schlenk tube, Pd(OAc)<sub>2</sub> (2.5 mg, 0.012 mmol, 8 mol%), NOBINAc (14 mg, 0.04 mmol, 28 mol%), CuO (11.5 mg, 0.14 mmol, 1 equiv.), CsF (44 mg, 0.28 mmol, 2 equiv.) and ferrocenyl secondary amine **1a** (50 mg, 0.14 mmol, 1 equiv.) were added in dry THF (1.5 mL) under an inert atmosphere and the resulted orange colored solution was stirred for 10 min. After pre-stirring, olefin **2aa** (55  $\mu$ L, 0.29 mmol, 2 equiv.) was added. The tube was sealed with a rubber septum, and a dry air atmosphere was maintained in the flask with a balloon. The reaction was heated at 75 °C, stirred for 10 h, and then cooled to room temperature. The crude reaction mixture was passed through a celite pad, evaporation, and column chromatography on silica gel (mesh 230-400) using hexane: ethyl acetate (85:15) eluent to afford chiral 1,2-alkenylated ferrocenyl amines (**4a-4n**).

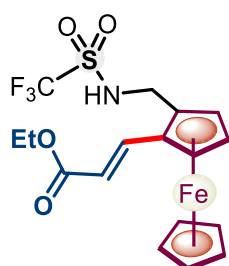

**Chiral 1,2-alkenylated ferrocenyl amine 4a** was purified on silica gel (mesh 230-400) in (hexanes: ethyl acetate; 85:15), obtained as an orange yellow solid, mp: 104 °C-105 °C. Yield: 32 mg (52%).  $^1\text{H}$  NMR (400 MHz,  $\text{CDCl}_3$ )  $\delta$  7.59 (d,  $J = 15.6$  Hz, 1H), 6.11 (d,  $J = 15.6$  Hz, 1H), 5.46 (s, 1H), 4.66 (s, 1H), 4.52 (d,  $J = 17.2$  Hz, 2H), 4.38 (t,  $J = 5.8$  Hz, 2H), 4.24 (d,  $J = 7.1$  Hz, 2H), 4.20 (s, 5H), 1.35 (t,  $J = 7.1$  Hz, 3H).  $^{13}\text{C}\{^1\text{H}\}$  NMR (176 MHz,  $\text{CDCl}_3$ )  $\delta$  167.1 (C), 141.9 (CH),  $\delta$  119.7 (d,  $J = 321.2$  Hz  $\text{CF}_3$ ), 116. (CH), 83.2 (C), 78.0 (C), 71.9 (CH), 70.6 (CH), 70.4 (CH), 67.2 (CH), 60.5 ( $\text{CH}_2$ ), 42.2 ( $\text{CH}_2$ ), 14.2 ( $\text{CH}_3$ ). HRLCMS (ESI)  $m/z$ :  $[\text{M}+\text{Na}]^+$  Calcd for  $\text{C}_{17}\text{H}_{18}\text{F}_3\text{FeNO}_4\text{SNa}$  468.0150; Found 468.0144. The enantioselectivity of the product **4a** was determined by chiral HPLC analysis on AD-H column (hexane: isopropanol = 80:20, 1 mL/min,  $\lambda=254$  nm).

Racemic sample (4a)

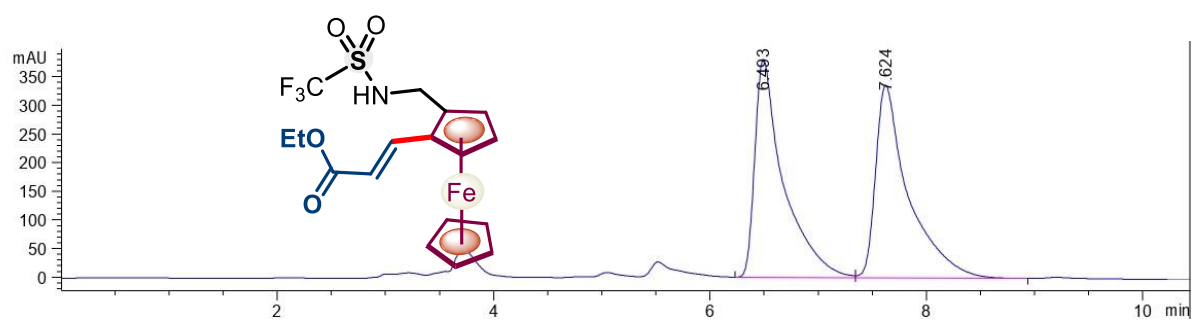

| Peak # | RetTime [min] | Type | Width [min] | Area [mAU*s] | Height [mAU] | Area %  |
|--------|---------------|------|-------------|--------------|--------------|---------|
| 1      | 6.493         | BV   | 0.2591      | 7016.11914   | 380.49390    | 49.7528 |
| 2      | 7.624         | VB   | 0.2958      | 7085.84619   | 336.38715    | 50.2472 |

Asymmetric sample (4a)

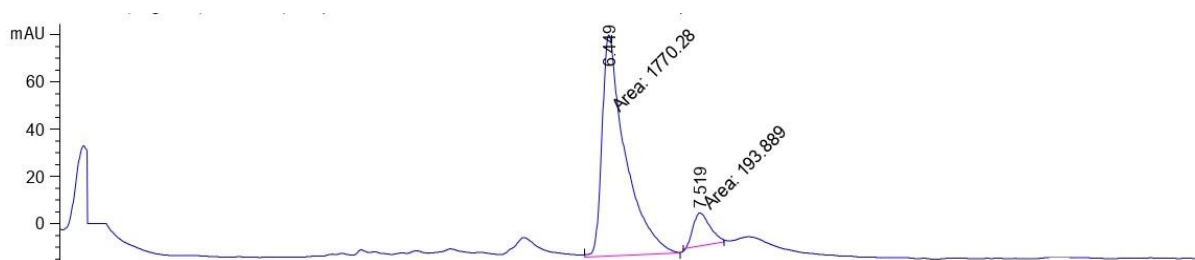

| Peak # | RetTime [min] | Type | Width [min] | Area [mAU*s] | Height [mAU] | Area %  |
|--------|---------------|------|-------------|--------------|--------------|---------|
| 1      | 6.449         | MM   | 0.3153      | 1770.28333   | 93.59005     | 90.1287 |
| 2      | 7.519         | MM   | 0.2305      | 193.88928    | 14.01961     | 9.8713  |

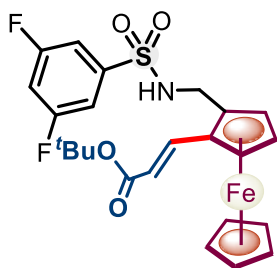

**Chiral 1,2-alkenylated ferrocenyl amine 4b** was purified on silica gel (mesh 230-400) in (hexanes: ethyl acetate; 80:20), obtained as an orange red solid, mp: 112-113 °C. Yield: 40 mg (56%).  $^1\text{H}$  NMR (400 MHz,  $\text{CDCl}_3$ )  $\delta$  7.44 – 7.35 (m, 3H), 7.02 (t,  $J = 8.9$  Hz, 1H), 5.96 (d,  $J = 15.3$  Hz, 1H), 4.89 (t,  $J = 7.2$  Hz, 1H), 4.52 (s, 1H), 4.35 (d,  $J = 6.6$  Hz, 2H), 4.14 (s, 7H), 1.55 (s, 9H).  $^{13}\text{C}\{^1\text{H}\}$  NMR (176 MHz,  $\text{CDCl}_3$ )  $\delta$  166.4 (C), 162.7 (dd,  $J = 254.6, 11.7$  Hz C-F), 143.6 (t,  $J = 8.3$  Hz C), 140.7 (CH), 118.3 (CH), 110.6 (dd,  $J = 22.4, 5.7$  Hz CH), 108.2 (t,  $J = 25.0$  Hz CH), 83.5 (C), 80.5 (C), 78.0 (CH), 71.6 (CH), 70.2 (CH), 69.8 (CH), 66.8 (C), 41.2 ( $\text{CH}_2$ ), 28.2 ( $\text{CH}_3$ ). HRLCMS (ESI-QTOF)  $m/z$ :  $[\text{M}]^+$  Calcd for  $\text{C}_{24}\text{H}_{25}\text{F}_2\text{FeNO}_4\text{S}$  517.0817; Found 517.0814. The enantioselectivity of the product **4b** was determined by chiral HPLC analysis on AD-3 column (hexane: isopropanol = 95:5, 1 mL/min,  $\lambda=254$  nm)

Racemic sample (**4b**)

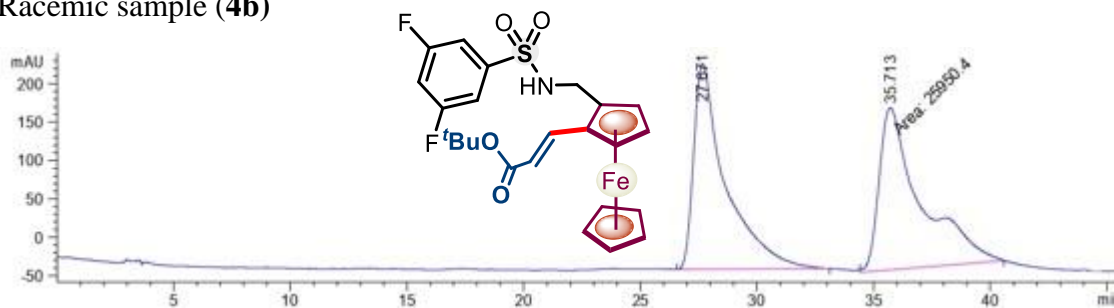

| Peak # | RetTime [min] | Type | Width [min] | Area [mAU*s] | Height [mAU] | Area %  |
|--------|---------------|------|-------------|--------------|--------------|---------|
| 1      | 27.671        | BB   | 1.3173      | 2.54164e4    | 267.79654    | 49.4803 |
| 2      | 35.713        | MM   | 2.0496      | 2.59504e4    | 211.02377    | 50.5197 |

Asymmetric sample (**4b**)

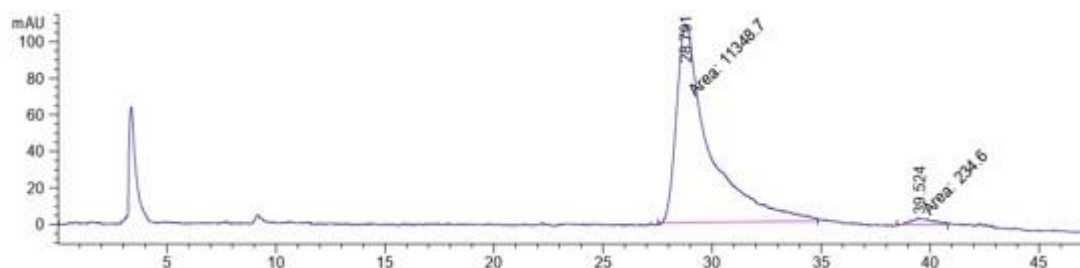

| Peak # | RetTime [min] | Type | Width [min] | Area [mAU*s] | Height [mAU] | Area %  |
|--------|---------------|------|-------------|--------------|--------------|---------|
| 1      | 28.791        | MM   | 1.7484      | 1.13487e4    | 108.18298    | 97.9747 |
| 2      | 39.524        | MM   | 1.1072      | 234.59998    | 3.53142      | 2.0253  |

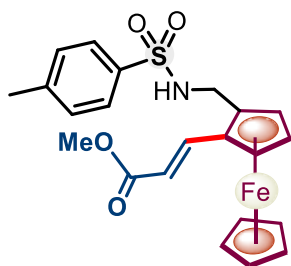

**Chiral 1,2 alkenylated ferrocenyl amine 4c** was purified on silica gel (mesh 230-400) in (hexanes: ethyl acetate; 80:20), obtained as an orange red solid, mp: 104-105 °C. Yield: 30 mg (47%).  $^1\text{H}$  NMR (400 MHz,  $\text{CDCl}_3$ )  $\delta$  7.78 (d,  $J = 7.6$  Hz, 2H), 7.46 (d,  $J = 15.5$  Hz, 1H), 7.35 (d,  $J = 7.4$  Hz, 2H), 6.03 (d,  $J = 15.3$  Hz, 1H), 4.58 (s, 1H), 4.54 (s, 1H), 4.39 (s, 2H), 4.14 (s, 5H), 4.02 (s, 2H), 3.79 (s, 3H), 2.47 (s, 3H).  $^{13}\text{C}\{^1\text{H}\}$  NMR (176 MHz,  $\text{CDCl}_3$ )  $\delta$  167.3 (C), 143.7 (C), 142.7 (C), 136.7 (CH), 129.9 (CH), 127.2 (CH), 115.8 (CH), 85.1 (C), 78.6 (C), 72.5 (CH), 71.3 (CH), 71.0 (CH), 67.8 (CH), 51.6 ( $\text{CH}_3$ ), 41.0 ( $\text{CH}_2$ ), 21.6 ( $\text{CH}_3$ ). HRLCMS (ESI-QTOF)  $m/z$ :  $[\text{M}+\text{H}]^+$  Calcd for  $\text{C}_{22}\text{H}_{24}\text{FeNO}_4\text{S}$  454.0770; Found 454.0778. The enantioselectivity of the product **4c** was determined by chiral HPLC analysis on AD-H column (hexane: isopropanol = 90:10, 1 mL/min,  $\lambda=254$  nm)

Racemic sample (4c)

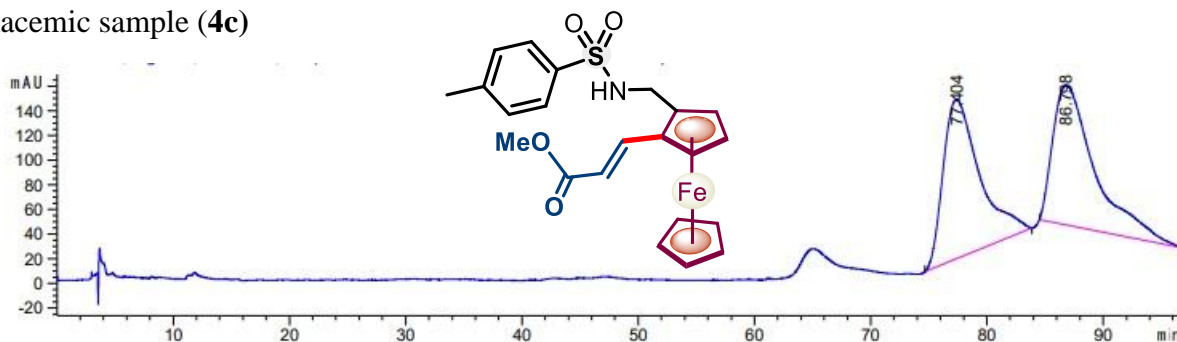

| Peak # | RetTime [min] | Type | Width [min] | Area [mAU*s] | Height [mAU] | Area %  |
|--------|---------------|------|-------------|--------------|--------------|---------|
| 1      | 77.404        | BB   | 2.5803      | 2.80602e4    | 128.97166    | 49.6750 |
| 2      | 86.798        | BBA  | 2.9365      | 2.84274e4    | 113.24978    | 50.3250 |

Totals :                      5.64876e4    242.22144

Asymmetric sample (4c)

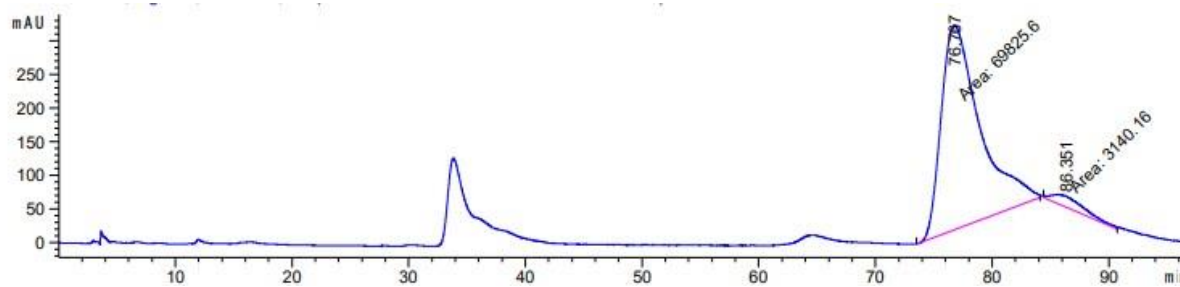

| Peak # | RetTime [min] | Type | Width [min] | Area [mAU*s] | Height [mAU] | Area %  |
|--------|---------------|------|-------------|--------------|--------------|---------|
| 1      | 76.767        | MM   | 3.8306      | 6.98256e4    | 303.80820    | 95.6964 |
| 2      | 86.351        | MM   | 3.2767      | 3140.16357   | 15.97230     | 4.3036  |

Totals :                      7.29658e4    319.78050

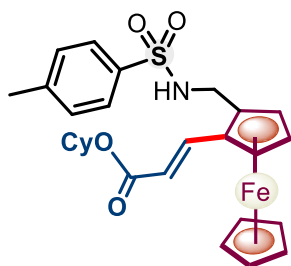

**Chiral 1,2-alkenylated ferrocenyl amine 4d** was purified on silica gel (mesh 230-400) in (hexanes: ethyl acetate; 75:25), obtained as an orange red solid, mp: 120-121 °C. Yield: 41 mg (57%).  $^1\text{H}$  NMR (400 MHz,  $\text{CDCl}_3$ )  $\delta$  7.79 (d,  $J = 7.7$  Hz, 2H), 7.46 (d,  $J = 15.7$  Hz, 1H), 7.35 (d,  $J = 7.4$  Hz, 2H), 6.03 (d,  $J = 15.5$  Hz, 1H), 4.87 (s, 1H), 4.55 (s, 2H), 4.35 (s, 2H), 4.13 (s, 5H), 4.04 (d,  $J = 5.7$  Hz, 2H), 2.47 (s, 3H), 1.99 – 1.90 (m, 2H), 1.85 – 1.76 (m, 2H), 1.52-1.37 (m, , 6H).  $^{13}\text{C}\{^1\text{H}\}$  NMR (176 MHz,  $\text{CDCl}_3$ )  $\delta$  166.4 (C), 143.6 (C), 141.9 (C), 136.7 (CH), 129.9 (CH), 127.1 (CH), 116.9 (CH), 84.2 (C), 77.9 (C), 72.7 (CH), 71.3 (CH), 70.2 (CH), 69.9 (CH), 67.0 (CH), 40.9 ( $\text{CH}_2$ ), 31.8 ( $\text{CH}_2$ ), 25.4 ( $\text{CH}_2$ ), 23.9 ( $\text{CH}_2$ ), 21.5 ( $\text{CH}_3$ ). HRLCMS (ESI-QTOF)  $m/z$ :  $[\text{M}]^+$  Calcd for  $\text{C}_{27}\text{H}_{31}\text{FeNO}_4\text{S}$  521.1318; Found 521.1311. The enantioselectivity of the product **4d** was determined by chiral HPLC analysis on AD-3 column (hexane: isopropanol = 75:25, 1 mL/min,  $\lambda=254$  nm)



Racemic sample (4d)

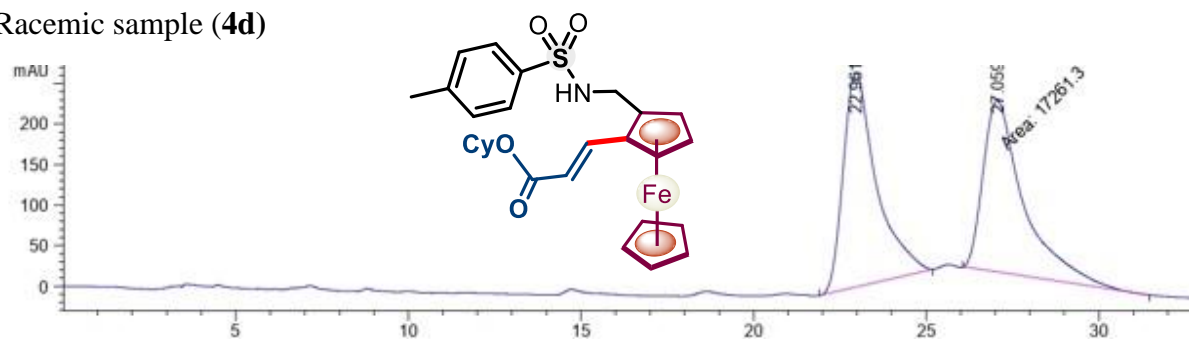

| Peak # | RetTime [min] | Type | Width [min] | Area [mAU*s] | Height [mAU] | Area %  |
|--------|---------------|------|-------------|--------------|--------------|---------|
| 1      | 22.961        | BB   | 0.9803      | 1.76863e4    | 265.10019    | 50.6080 |
| 2      | 27.059        | MM   | 1.3587      | 1.72613e4    | 211.73032    | 49.3920 |

Asymmetric sample (4d)

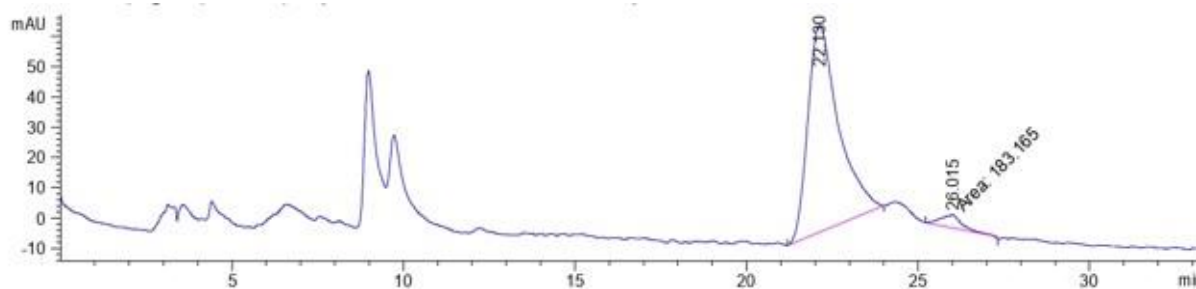

| Peak # | RetTime [min] | Type | Width [min] | Area [mAU*s] | Height [mAU] | Area %  |
|--------|---------------|------|-------------|--------------|--------------|---------|
| 1      | 22.130        | BB   | 0.9009      | 4247.79834   | 68.17578     | 95.8662 |
| 2      | 26.015        | MM   | 0.6978      | 183.16504    | 4.37457      | 4.1338  |

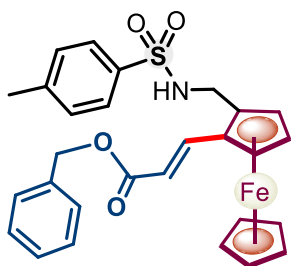

**Chiral 1,2-alkenylated ferrocenyl amine 4e** was purified on silica gel (mesh 230-400) in (hexanes: ethyl acetate;80:20), obtained as an orange yellow solid, mp: 114-115 °C. Yield: 44 mg (60%).  $^1\text{H}$  NMR (400 MHz,  $\text{CDCl}_3$ )  $\delta$  7.77 (d,  $J = 7.5$  Hz, 2H), 7.53 (d,  $J = 15.4$  Hz, 1H), 7.48 – 7.35 (m, 5H), 7.31 (d,  $J = 8.0$  Hz, 2H), 6.08 (d,  $J = 15.8$  Hz, 1H), 5.24 (s, 2H), 4.62 (t,  $J = 6.4$  Hz, 1H), 4.55 (s, 1H), 4.37 (s, 2H), 4.12 (s, 5H), 4.03 (d,  $J = 5.6$  Hz, 2H), 2.45 (s, 3H).  $^{13}\text{C}\{^1\text{H}\}$  NMR (176 MHz,  $\text{CDCl}_3$ )  $\delta$  166.7 (C), 143.7 (C), 143.0 (CH), 136.7 (CH), 136.1 (CH), 129.9 (CH), 128.6 (CH), 128.3 (CH), 128.2 (CH), 127.1 (CH), 115.8 (CH), 84.3 (C), 77.6 (C), 71.5 (CH), 70.3 (CH), 70.0 (CH), 67.1 (CH), 66.2 ( $\text{CH}_2$ ), 40.9 ( $\text{CH}_2$ ), 21.5 ( $\text{CH}_3$ ). HRLCMS (ESI-QTOF)  $m/z$ :  $[\text{M}+\text{Na}]^+$  Calcd for  $\text{C}_{28}\text{H}_{27}\text{FeNO}_4\text{SNa}$  552.0903; Found 552.0886. The enantioselectivity of the product **4e** was determined by chiral HPLC analysis on AD-H column (hexane: isopropanol = 70:30, 1 mL/min,  $\lambda=254$  nm)

Racemic sample (4e)

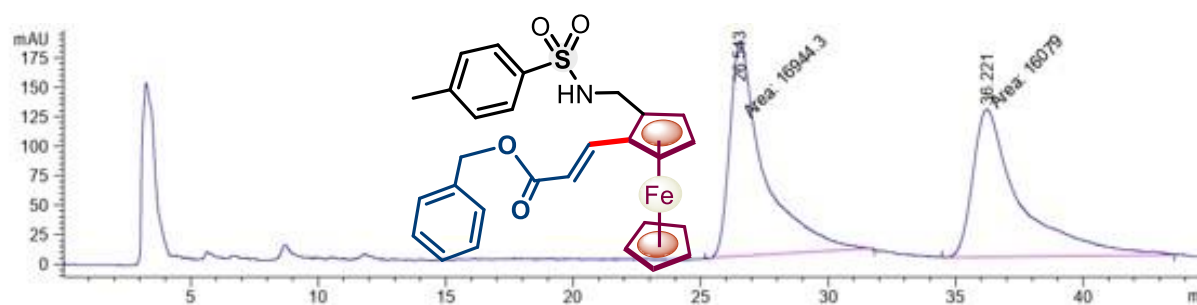

| Peak # | RetTime [min] | Type | Width [min] | Area [mAU*s] | Height [mAU] | Area %  |
|--------|---------------|------|-------------|--------------|--------------|---------|
| 1      | 26.543        | MM   | 1.5495      | 1.69443e4    | 182.25853    | 51.3102 |
| 2      | 36.221        | MM   | 2.1393      | 1.60790e4    | 125.26550    | 48.6898 |

Asymmetric sample (4e)

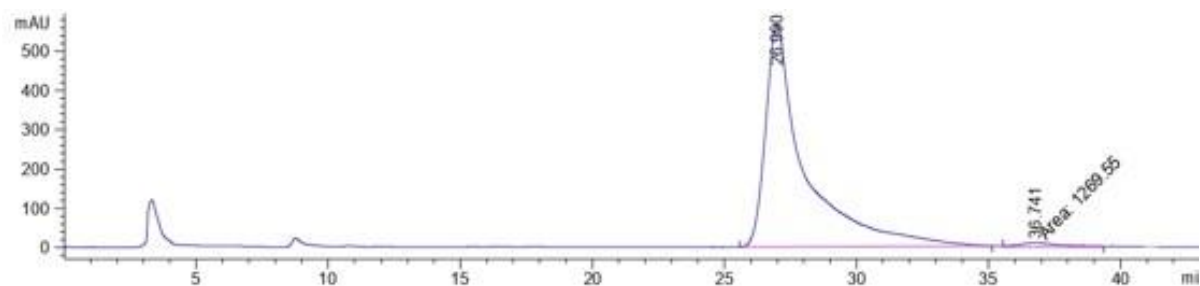

| Peak # | RetTime [min] | Type | Width [min] | Area [mAU*s] | Height [mAU] | Area %  |
|--------|---------------|------|-------------|--------------|--------------|---------|
| 1      | 26.990        | BB   | 1.4092      | 5.84010e4    | 567.23132    | 97.8724 |
| 2      | 36.741        | MM   | 1.9674      | 1269.54712   | 10.75491     | 2.1276  |

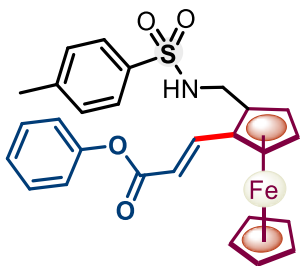

**Chiral 1,2-alkenylated ferrocenyl amine 4f** was purified on silica gel (mesh 230-400) in (hexanes: ethyl acetate; 85:15), obtained as an orange yellow solid, mp: 111-112 °C. Yield. 25 mg (35%).  $^1\text{H}$  NMR (400 MHz,  $\text{CDCl}_3$ )  $\delta$  7.79 (d,  $J = 7.0$  Hz, 2H), 7.64 (d,  $J = 15.3$  Hz, 1H), 7.41 (dt,  $J = 14.9, 8.1$  Hz, 5H), 7.34 (d,  $J = 6.3$  Hz, 2H), 6.21 (d,  $J = 15.2$  Hz, 1H), 4.66 (s, 1H), 4.58 (s, 2H), 4.22 (s, 5H), 4.12 – 3.99 (m, 2H), 2.41 (s, 3H).  $^{13}\text{C}\{^1\text{H}\}$  NMR (176 MHz,  $\text{CDCl}_3$ )  $\delta$  171.2 (C), 165.1 (C), 150.9 (C), 144.8 (C), 136.7 (CH), 129.9 (CH), 129.3 (CH), 127.2 (CH), 125.7 (CH), 121.5 (CH), 115.3 (CH), 84.1 (C), 78.3 (C), 73.6 (CH), 72.5 (CH), 70.8 (CH), 67.8 (CH), 46.5 ( $\text{CH}_2$ ), 21.5 ( $\text{CH}_3$ ). HRLCMS (QTOF-ESI)  $m/z$ :  $[\text{M} + \text{Na}]^+$  Calcd for  $\text{C}_{27}\text{H}_{25}\text{FeNO}_4\text{SNa}$  538.0746 Found 538.0730. The enantioselectivity of the product **4f** was determined by chiral HPLC analysis on AD-H column (hexane: isopropanol = 70:30, 1 mL/min,  $\lambda=254$  nm)

Racemic sample (4f)

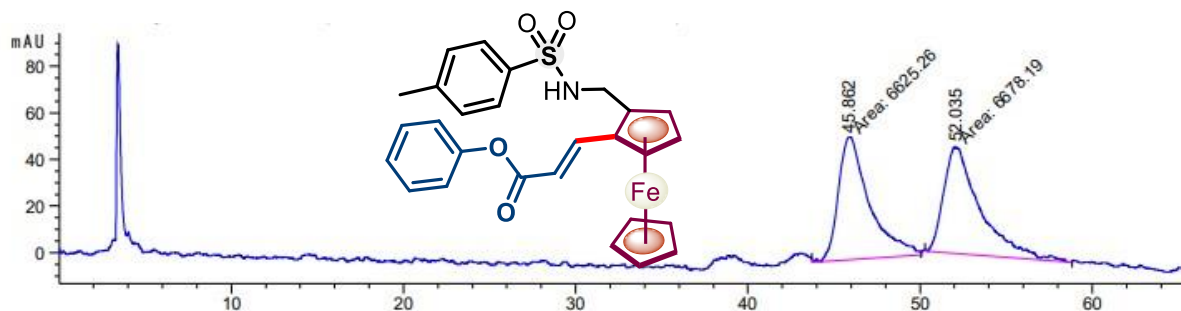

| Peak # | RetTime [min] | Type | Width [min] | Area [mAU*s] | Height [mAU] | Area %  |
|--------|---------------|------|-------------|--------------|--------------|---------|
| 1      | 45.862        | MM   | 2.0921      | 6625.26123   | 52.78083     | 49.8011 |
| 2      | 52.035        | MM   | 2.4361      | 6678.18604   | 45.68973     | 50.1989 |

Totals : 1.33034e4 98.47056

Asymmetric sample (4f)

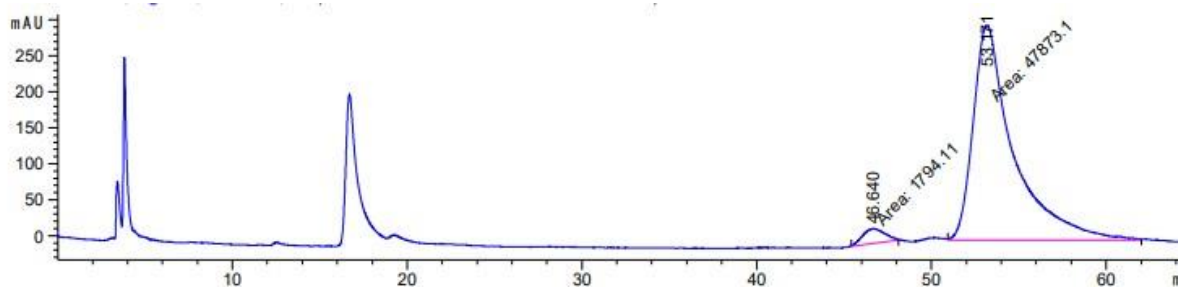

| Peak # | RetTime [min] | Type | Width [min] | Area [mAU*s] | Height [mAU] | Area %  |
|--------|---------------|------|-------------|--------------|--------------|---------|
| 1      | 46.640        | MM   | 1.4555      | 1794.10571   | 20.54396     | 3.6123  |
| 2      | 53.171        | MM   | 2.6712      | 4.78731e4    | 298.69876    | 96.3877 |

Totals : 4.96672e4 319.24272

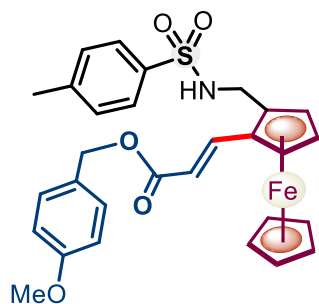

**Chiral 1,2 alkenylated ferrocenyl amine 4g** was purified on silica gel (mesh 230-400) in (hexanes: ethyl acetate; 85:15), obtained as an orange yellow solid, mp: 110-111 °C. Yield: 45 mg (57%).  $^1\text{H}$  NMR (400 MHz,  $\text{CDCl}_3$ )  $\delta$  7.77 (d,  $J = 7.9$  Hz, 2H), 7.51 (d,  $J = 15.6$  Hz, 1H), 7.38 (d,  $J = 8.3$  Hz, 2H), 7.31 (d,  $J = 8.1$  Hz, 2H), 6.94 (d,  $J = 8.0$  Hz, 2H), 6.05 (d,  $J = 15.9$  Hz, 1H), 5.16 (s, 2H), 4.64 (t,  $J = 6.0$  Hz, 1H), 4.53 (s, 1H), 4.36 (s, 2H), 4.11 (s, 5H), 4.02 (d,  $J = 5.9$  Hz, 2H), 3.84 (s, 3H), 2.45 (s, 3H).  $^{13}\text{C}\{^1\text{H}\}$  NMR (176 MHz,  $\text{CDCl}_3$ )  $\delta$  166.8 (C), 159.6 (C), 143.6 (C), 142.8 (C), 136.7 (C), 130.2 (CH), 129.8 (CH), 127.1 (CH), 126.4 (CH), 115.9 (CH), 114.0 (CH), 84.3 (C), 77.6 (C), 71.4 (CH), 70.2 (CH), 70.0 (CH), 67.0 (CH), 66.0 ( $\text{CH}_2$ ), 55.3 ( $\text{CH}_3$ ), 40.96 ( $\text{CH}_2$ ), 21.58 ( $\text{CH}_3$ ). HRLCMS (ESI-QTOF)  $m/z$ :  $[\text{M}]^+$  Calcd for  $\text{C}_{29}\text{H}_{29}\text{FeNO}_5\text{S}$  559.1116; Found 559.1111. The enantioselectivity of the product **4g** was determined by chiral HPLC analysis on OZ-3 column (hexane: isopropanol = 80:20, 1 mL/min,  $\lambda=254$  nm)

Racemic sample (4g)

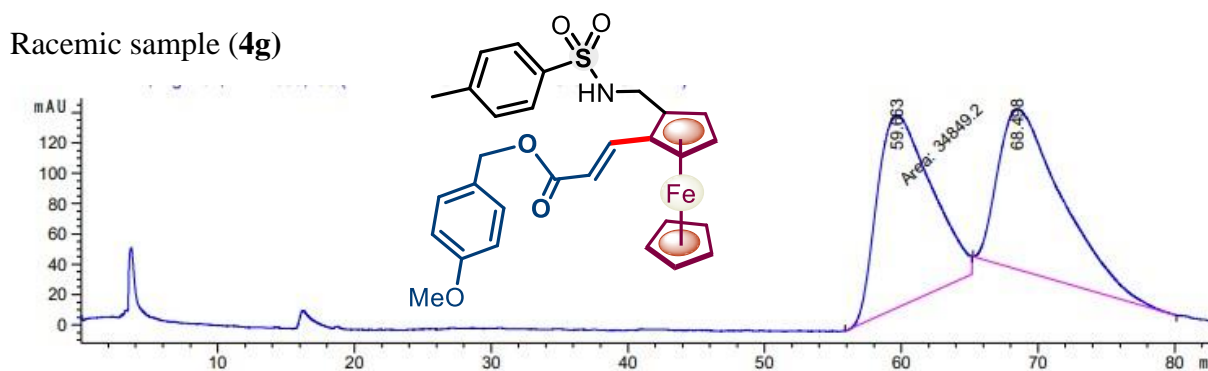

| Peak # | RetTime [min] | Type | Width [min] | Area [mAU*s] | Height [mAU] | Area %  |
|--------|---------------|------|-------------|--------------|--------------|---------|
| 1      | 59.663        | MM   | 4.5552      | 3.48492e4    | 127.50578    | 49.9982 |
| 2      | 68.498        | BB   | 3.8528      | 3.48517e4    | 105.91933    | 50.0018 |

Totals : 6.97010e4 233.42511

Asymmetric sample (4g)

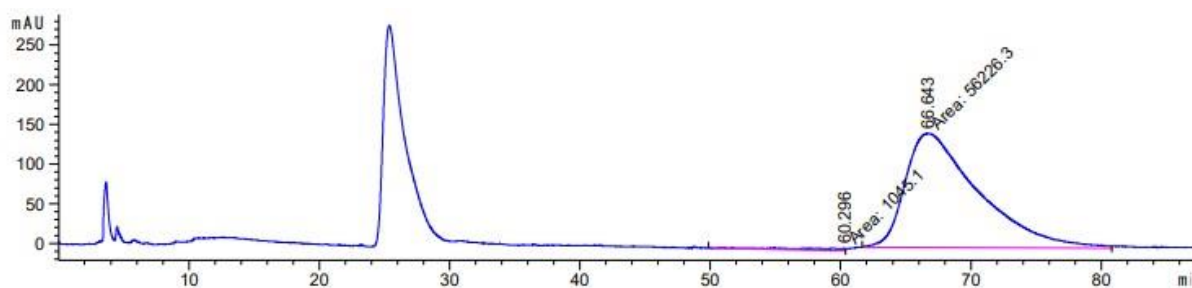

| Peak # | RetTime [min] | Type | Width [min] | Area [mAU*s] | Height [mAU] | Area %  |
|--------|---------------|------|-------------|--------------|--------------|---------|
| 1      | 60.296        | MM   | 5.3448      | 1045.10059   | 3.25892      | 1.8248  |
| 2      | 66.643        | MM   | 6.5269      | 5.62263e4    | 143.57619    | 98.1752 |

Totals : 5.72714e4 146.83510

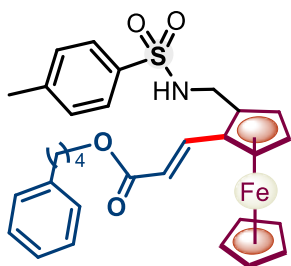

**Chiral 1,2-alkenylated ferrocenyl amine 4h** was purified on silica gel (mesh 230-400) in (hexanes: ethyl acetate; 80:20), obtained as an orange yellow solid, mp: 113-114 °C. Yield: 53 mg (67%).  $^1\text{H}$  NMR (400 MHz,  $\text{CDCl}_3$ )  $\delta$  7.78 (d,  $J = 7.7$  Hz, 2H), 7.49 (d,  $J = 15.6$  Hz, 1H), 7.31 (t,  $J = 7.9$  Hz, 4H), 7.22 (d,  $J = 7.5$  Hz, 3H), 6.03 (d,  $J = 15.7$  Hz, 1H), 4.97 – 4.80 (m, 1H), 4.54 (s, 1H), 4.36 (s, 2H), 4.20 (d,  $J = 5.9$  Hz, 2H), 4.09 (d,  $J = 13.0$  Hz, 5H), 4.03 (d,  $J = 5.7$  Hz, 2H), 2.70 (brs, 2H), 2.45 (s, 3H), 1.76 (brs, 4H).  $^{13}\text{C}\{^1\text{H}\}$  NMR (176 MHz,  $\text{CDCl}_3$ )  $\delta$  167.0 (C), 143.6 (C), 142.6 (C), 142.1 (C), 136.8 (CH), 129.8 (CH), 128.4 (CH), 128.3 (CH), 127.1 (CH), 125.8 (CH), 116.0 (CH), 84.3 (C), 77.6 (C), 71.4 (CH), 70.2 (CH), 69.9 (CH), 66.9 (CH), 64.3 ( $\text{CH}_2$ ), 40.9 ( $\text{CH}_2$ ), 35.5 ( $\text{CH}_2$ ), 28.3 ( $\text{CH}_2$ ), 27.8 ( $\text{CH}_2$ ), 21.6 ( $\text{CH}_3$ ). HRLCMS (ESI-QTOF)  $m/z$ :  $[\text{M}]^+$  Calcd for  $\text{C}_{31}\text{H}_{33}\text{FeNO}_4\text{S}$  571.1475; Found 571.1478. The enantioselectivity of the product **4h** was determined by chiral HPLC analysis on AD-H column (hexane: isopropanol = 80:20, 1 mL/min,  $\lambda=254$  nm)



Racemic sample (4h)

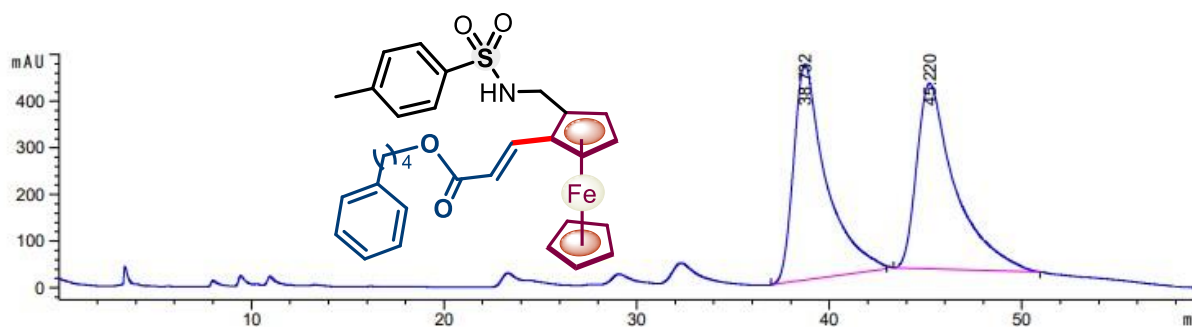

| Peak # | RetTime [min] | Type | Width [min] | Area [mAU*s] | Height [mAU] | Area %  |
|--------|---------------|------|-------------|--------------|--------------|---------|
| 1      | 38.732        | BV   | 1.6878      | 5.43959e4    | 462.60364    | 49.6174 |
| 2      | 45.220        | BB   | 1.9643      | 5.52349e4    | 397.71985    | 50.3826 |

Totals :                      1.09631e5    860.32349

Asymmetric sample (4h)

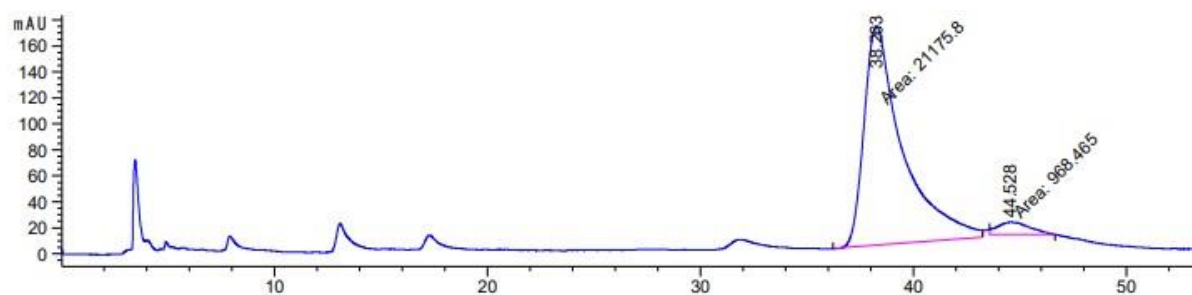

| Peak # | RetTime [min] | Type | Width [min] | Area [mAU*s] | Height [mAU] | Area %  |
|--------|---------------|------|-------------|--------------|--------------|---------|
| 1      | 38.263        | MM   | 2.0960      | 2.11758e4    | 168.38132    | 95.6266 |
| 2      | 44.528        | MM   | 1.7507      | 968.46454    | 9.21972      | 4.3734  |

Totals :                      2.21443e4    177.60103

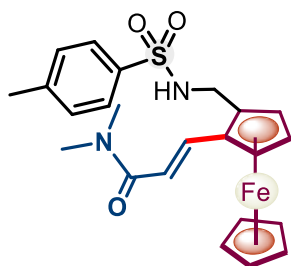

**Chiral 1,2 alkenylated ferrocenyl amine 4i** was purified on silica gel (mesh 230-400) in (hexanes: ethyl acetate; 60:40), obtained as an orange yellow solid, mp: 120-121 °C. Yield: 38 mg (58%).  $^1\text{H}$  NMR (400 MHz,  $\text{CDCl}_3$ )  $\delta$  7.78 (d,  $J = 7.6$  Hz, 2H), 7.47 (d,  $J = 15.0$  Hz, 1H), 7.35 (d,  $J = 7.7$  Hz, 2H), 6.57 (d,  $J = 15.0$  Hz, 1H), 4.88 (t,  $J = 6.4$  Hz, 1H), 4.54 (s, 1H), 4.35 – 4.27 (m, 2H), 4.10 (s, 5H), 4.08 (d,  $J = 7.0$  Hz, 1H), 3.96 (dd,  $J = 13.9, 5.6$  Hz, 1H), 3.14 (s, 3H), 3.05 (s, 3H), 2.47 (s, 3H).  $^{13}\text{C}\{^1\text{H}\}$  NMR (126 MHz,  $\text{CDCl}_3$ )  $\delta$  166.7 (C), 143.5 (C), 139.7 (C), 136.8 (CH), 129.8 (CH), 127.1 (CH), 115.6 (CH), 83.3 (C), 79.3 (C), 71.3 (CH), 70.0 (CH), 69.3 (CH), 67.7 (CH), 41.4 ( $\text{CH}_2$ ), 37.4 ( $\text{CH}_3$ ), 35.9 ( $\text{CH}_3$ ), 21.59 ( $\text{CH}_3$ ). HRLCMS (ESI-QTOF)  $m/z$ :  $[\text{M}]^+$  Calcd for  $\text{C}_{23}\text{H}_{26}\text{FeN}_2\text{O}_3\text{S}$  466.1008; Found 466.0994. The enantioselectivity of the product **4i** was determined by chiral HPLC analysis on AD-3 column (hexane: isopropanol = 65:35, 1 mL/min,  $\lambda=254$  nm)

Racemic sample (**4i**)

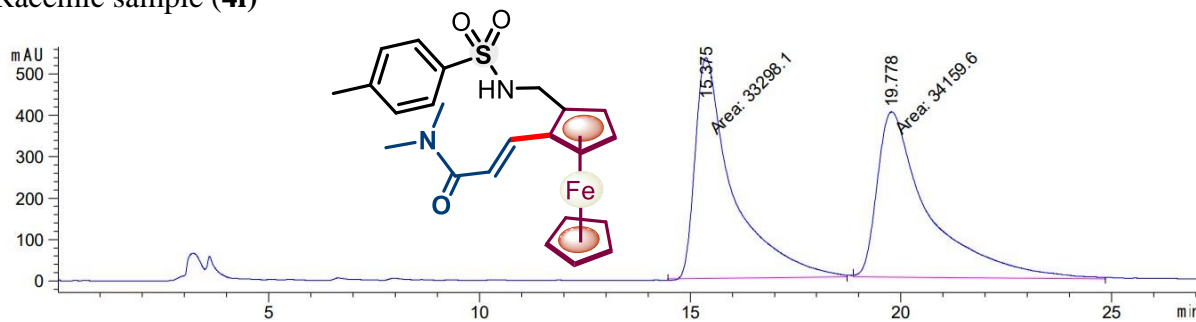

| Peak # | RetTime [min] | Type | Width [min] | Area [mAU*s] | Height [mAU] | Area %  |
|--------|---------------|------|-------------|--------------|--------------|---------|
| 1      | 15.375        | MM   | 1.0397      | 3.32981e4    | 533.80139    | 49.3615 |
| 2      | 19.778        | MM   | 1.4253      | 3.41596e4    | 399.44928    | 50.6385 |

Asymmetric sample (**4i**)

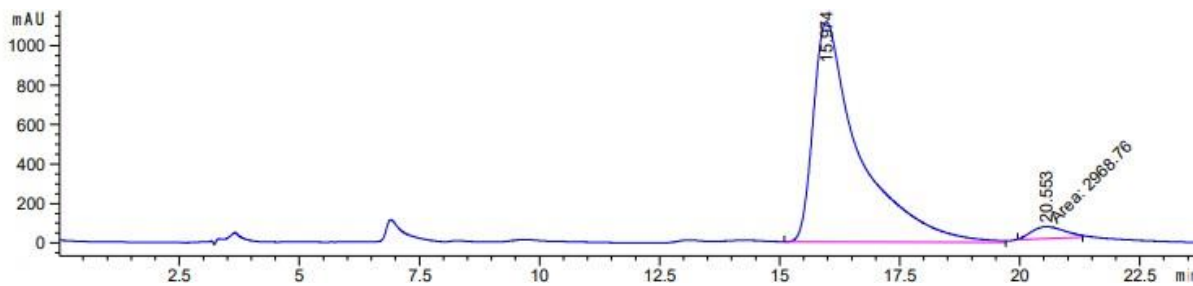

| Peak # | RetTime [min] | Type | Width [min] | Area [mAU*s] | Height [mAU] | Area %  |
|--------|---------------|------|-------------|--------------|--------------|---------|
| 1      | 15.974        | BV   | 0.9238      | 7.40190e4    | 1116.06067   | 96.1439 |
| 2      | 20.553        | MM   | 0.8061      | 2968.76221   | 61.38442     | 3.8561  |

Totals :                      7.69878e4   1177.44509

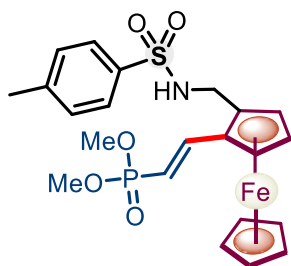

**Chiral 1,2-alkenylated ferrocenyl amine 4j** was purified on silica gel mesh (230-400) in (hexanes: ethylacetate; 50:50), obtained as an orange yellow solid, mp: 120-121 °C. Yield: 28 mg (40%).  $^1\text{H}$  NMR (500 MHz,  $\text{CDCl}_3$ )  $\delta$  7.74 (d,  $J = 6.1$  Hz, 2H), 7.33 (d,  $J = 7.0$  Hz, 2H), 6.46 – 6.09 (m, 1H), 5.80 (brs, 1H), 4.91 (s, 1H), 4.76 (d,  $J = 36.9$  Hz, 1H), 4.52 (d,  $J = 30.1$  Hz, 2H), 4.30 (s, 5H), 4.14 (d,  $J = 7.2$  Hz, 1H), 4.02 – 3.95 (brs, 1H), 3.77 (s, 3H), 3.75 (s, 3H), 2.46 (s, 3H).  $^{13}\text{C}\{^1\text{H}\}$  NMR (126 MHz,  $\text{CDCl}_3$ )  $\delta$  147.6 (C), 143.53 (CH), 136.98 (C), 129.8 (CH), 127.11 (CH), 109.7 (d,  $J = 194.0$  Hz CH), 84.2 (C), 78.2 (C), 71.7 (CH), 70.3 (CH), 69.9 (CH), 67.1 (CH), 60.4 ( $\text{CH}_3$ ), 52.4 ( $\text{CH}_3$ ), 40.9 ( $\text{CH}_2$ ), 21.5 ( $\text{CH}_3$ ).  $^{31}\text{P}$  NMR (202 MHz,  $\text{CDCl}_3$ )  $\delta$  22.9. HRLCMS (ESI-QTOF)  $m/z$ :  $[\text{M}+\text{H}]^+$  Calcd for  $\text{C}_{22}\text{H}_{27}\text{FeNO}_5\text{PS}$  504.0692; Found 504.0712. The enantioselectivity of the product **4j** was determined by chiral HPLC analysis on AD-H column (hexane: isopropanol = 80:20, 1 mL/min,  $\lambda=254$  nm)



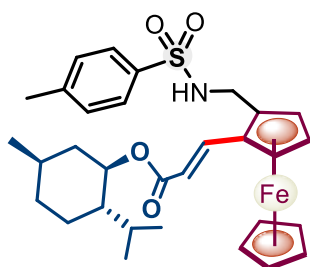

**Chiral 1,2 alkenylated ferrocenyl amine 4m** was purified on silica gel (mesh 230-400) in (hexanes: ethyl acetate; 80:20), obtained as inseparable mixture with **1d** an orange yellow solid, mp: 110-111 °C. Yield: 47 mg (58%).  $^1\text{H}$  NMR (400 MHz,  $\text{CDCl}_3$ )  $\delta$  7.79 (d,  $J = 12.0$  Hz, 2H), 7.47 (d,  $J = 15.7$  Hz, 1H), 7.34 (d,  $J = 7.9$  Hz, 2H), 6.01 (d,  $J = 15.9$  Hz, 1H), 4.80 (td,  $J = 10.5$ , 3.5 Hz, 1H), 4.71 (t,  $J = 5.5$  Hz, 1H), 4.54 (s, 1H), 4.35 (s, 2H), 4.12 (s, 5H), 4.03 (d,  $J = 5.8$  Hz, 2H), 2.46 (s, 3H), 2.06 (t,  $J = 6.3$  Hz, 1H), 2.00 – 1.91 (m, 1H), 1.73 (d,  $J = 11.8$  Hz, 2H), 1.60 – 1.42 (m, 2H), 0.95 (d,  $J = 6.7$  Hz, 6H), 0.83 (d,  $J = 6.9$  Hz, 3H).  $^{13}\text{C}\{^1\text{H}\}$  NMR (176 MHz,  $\text{CDCl}_3$ )  $\delta$  166.6 (C), 143.6 (C), 142.3 (C), 136.8 (CH), 129.8 (CH), 127.1 (CH), 116.7 (CH), 84.2 (C), 77.9 (C), 74.11 (CH), 71.30 (CH), 70.25 (CH), 69.88 (CH), 67.13 (CH), 47.15 ( $\text{CH}_2$ ), 41.2 ( $\text{CH}_3$ ), 41.0 (CH), 34.3 (CH), 31.4 ( $\text{CH}_2$ ), 26.4 ( $\text{CH}_2$ ), 23.6 (CH), 22.1 ( $\text{CH}_2$ ), 21.6 ( $\text{CH}_3$ ), 20.8 ( $\text{CH}_3$ ), 16.5 ( $\text{CH}_3$ ). HRLCMS (ESI-QTOF)  $m/z$ :  $[\text{M}]^+$  Calcd for  $\text{C}_{31}\text{H}_{39}\text{FeNO}_4\text{S}$  577.1944; Found 577.1946.

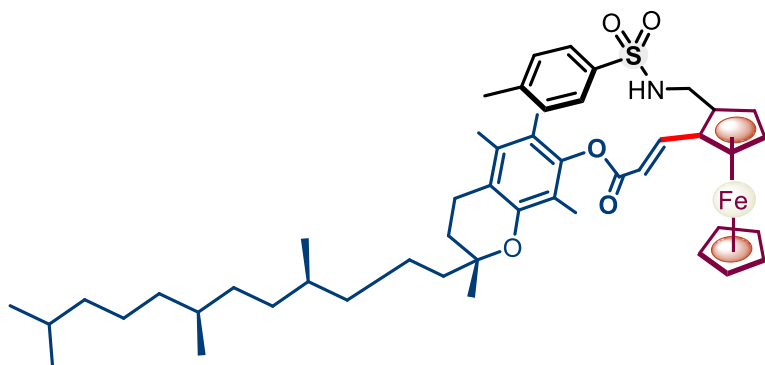

**Ferrocene fused tetrahydropyridine 4n** was purified on silica gel (mesh 230-400) in (hexanes: ethyl acetate; 80:20), obtained as inseparable mixture with **1d** as an orange yellow solid, mp: 125-126 °C. Yield: 57 mg (48%). <sup>1</sup>H NMR (400 MHz, CDCl<sub>3</sub>) δ 7.79 (d, *J* = 7.5 Hz, 2H), 7.68 (d, *J* = 15.0 Hz, 1H), 7.35 (d, *J* = 7.9 Hz, 2H), 6.27 (d, *J* = 15.6 Hz, 1H), 4.65 (s, 1H), 4.51 (s, 1H), 4.44 (s, 2H), 4.16 (s, 5H), 4.05 (d, *J* = 5.2 Hz, 2H), 2.64 (t, *J* = 6.5 Hz, 2H), 2.47 (s, 1H), 2.39 (s, 3H), 2.14 (s, 3H), 2.07 (s, 3H), 2.02 (s, 3H), 1.94 – 1.74 (m, 3H), 1.58 – 1.49 (m, 4H), 1.49 – 1.36 (m, 5H), 1.34 – 1.29 (m, 2H), 1.22 – 1.13 (m, 4H), 1.08 (dd, *J* = 11.0, 5.5 Hz, 3H), 0.93 – 0.83 (m, 14H). <sup>13</sup>C{<sup>1</sup>H} NMR (176 MHz, CDCl<sub>3</sub>) δ 165.4 (C), 149.4 (C), 144.1 (C), 143.7 (C), 143.5 (C), 140.4 (C), 136.8 (C), 136.6 (C), 129.7 (CH), 127.1 (CH), 123.0 (CH), 117.4 (CH), 115.1 (CH), 84.4 (C), 77.4 (C), 75.0 (CH), 71.8 (CH), 70.4 (CH), 70.3 (CH), 67.2 (C), 60.4 (CH<sub>2</sub>), 42.5 (CH<sub>2</sub>), 40.9 (CH<sub>2</sub>), 39.4 (CH<sub>2</sub>), 37.5 (CH<sub>2</sub>), 37.4 (CH<sub>2</sub>), 37.3 (CH), 32.8 (CH), 28.0 (CH), 24.8 (CH<sub>2</sub>), 24.4 (CH<sub>2</sub>), 22.7 (CH<sub>2</sub>), 22.6 (CH<sub>2</sub>), 21.6 (CH<sub>2</sub>), 21.4 (CH<sub>2</sub>), 21.0 (CH<sub>2</sub>), 20.6 (CH<sub>3</sub>), 19.8 (CH<sub>3</sub>), 19.7 (CH<sub>3</sub>), 19.6 (CH<sub>3</sub>), 14.2 (CH<sub>3</sub>), 13.0 (CH<sub>3</sub>), 12.2 (CH<sub>3</sub>), 11.9 (CH<sub>3</sub>). HRLCMS (ESI-QTOF) *m/z*: [M+Na]<sup>+</sup> Calcd for C<sub>50</sub>H<sub>69</sub>FeNO<sub>5</sub>Na 874.4140; Found 874.4139.

**Scheme S4.** Removal of protecting group

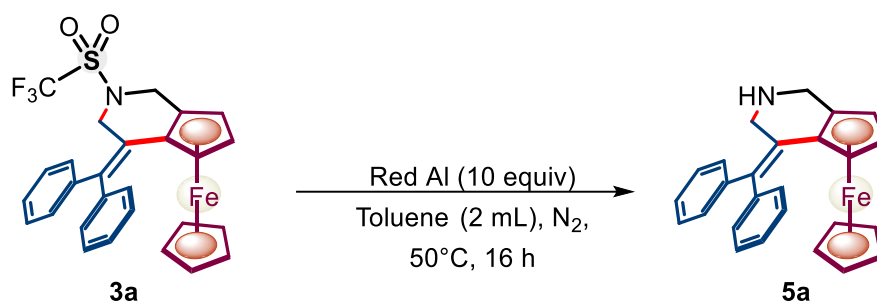

To a solution of **3a** (0.12 mmol, 1 equiv) in Toluene (2 mL, 0.06 M) under a nitrogen atmosphere, Red Al (1.2 mmol, 10 equiv) was slowly added at 0 °C. After the completion of the addition, the reaction was allowed to be stirred for 16 h before being quenched with NH<sub>4</sub>Cl solution. The organic layer was separated, and the aqueous layer was extracted with dichloromethane. The combined organic phase was washed with brine and then dried over Na<sub>2</sub>SO<sub>4</sub>. Evaporation and column chromatography on basic silica gel (mesh 100-200) with the solvent mixture of hexanes: ethyl acetate (20: 80) afforded **5a**. Orange yellow solid, mp: 110 °C-111 °C. Yield: 45mg (70%). <sup>1</sup>H NMR (400 MHz, CDCl<sub>3</sub>) δ 7.45 – 7.30 (m, 7H), 7.28 – 7.23 (m, 1H), 7.19 (d, J = 7.6 Hz, 2H), 4.25 (s, 1H), 4.11 (s, 5H), 4.04 (d, J = 16.4 Hz, 1H), 3.98 (d, J = 6.4 Hz, 1H), 3.74 (d, J = 15.5 Hz, 1H), 3.65 (d, J = 14.9 Hz, 2H), 3.11 (s, 1H), 2.04 (s, 1H). <sup>13</sup>C{<sup>1</sup>H} NMR (176 MHz, CDCl<sub>3</sub>) δ 143.4 (C), 142.0 (C), 135.9 (CH), 130.8 (CH), 129.6 (C), 129.3 (C), 128.6 (CH), 128.2 (CH), 127.0 (CH), 126.8 (CH), 85.2 (C), 79.1 (C), 70.2 (CH), 67.5 (CH), 65.9 (CH), 65.3 (CH), 48.5 (CH<sub>2</sub>), 45.3 (CH<sub>2</sub>). HRLCMS (ESI) *m/z*: [M+H]<sup>+</sup> Calcd for C<sub>26</sub>H<sub>24</sub>FeN 406.1253; Found 406.1237. The enantioselectivity of product **5a** was determined by chiral HPLC analysis on IE-3 column (hexane: isopropanol = 98:2, 1 mL/min, λ=254 nm).



### Racemic sample (5a)

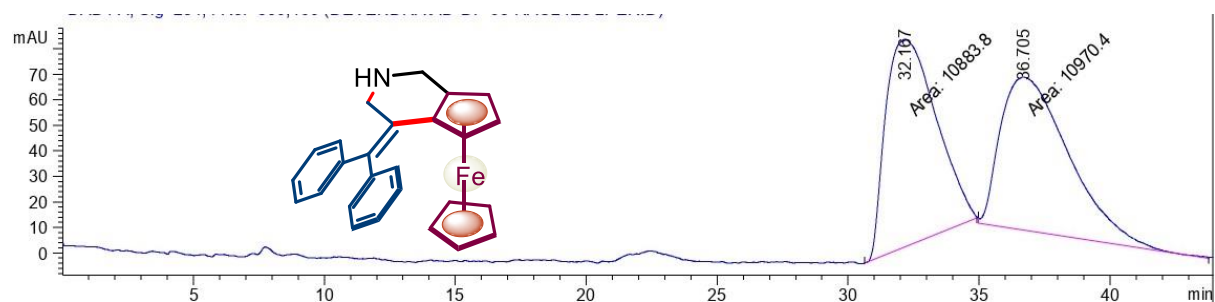

| Peak # | RetTime [min] | Type | Width [min] | Area [mAU*s] | Height [mAU] | Area %  |
|--------|---------------|------|-------------|--------------|--------------|---------|
| 1      | 32.167        | MM   | 2.2289      | 1.08838e4    | 81.38326     | 49.8019 |
| 2      | 36.705        | MM   | 3.0459      | 1.09704e4    | 60.02793     | 50.1981 |

### Asymmetric sample (5a)

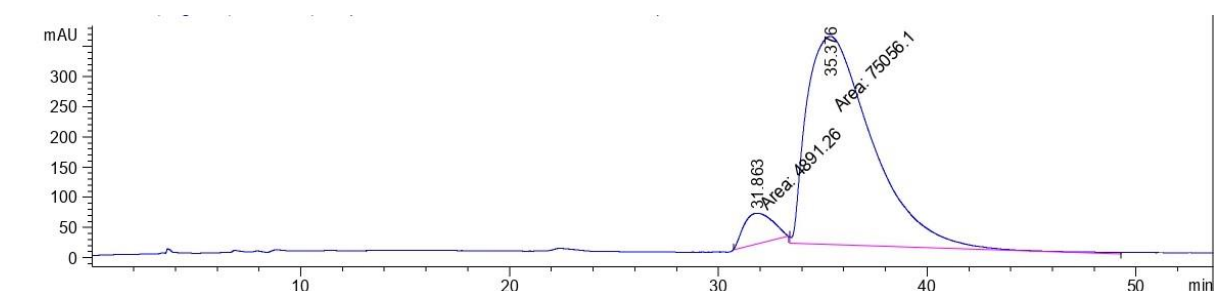

| Peak # | RetTime [min] | Type | Width [min] | Area [mAU*s] | Height [mAU] | Area %  |
|--------|---------------|------|-------------|--------------|--------------|---------|
| 1      | 31.863        | MM   | 1.6110      | 4891.25830   | 50.60256     | 6.1181  |
| 2      | 35.376        | MM   | 3.6289      | 7.50561e4    | 344.71545    | 93.8819 |

### Scheme S5. Oxidation of Amine and Aldehyde Reduction

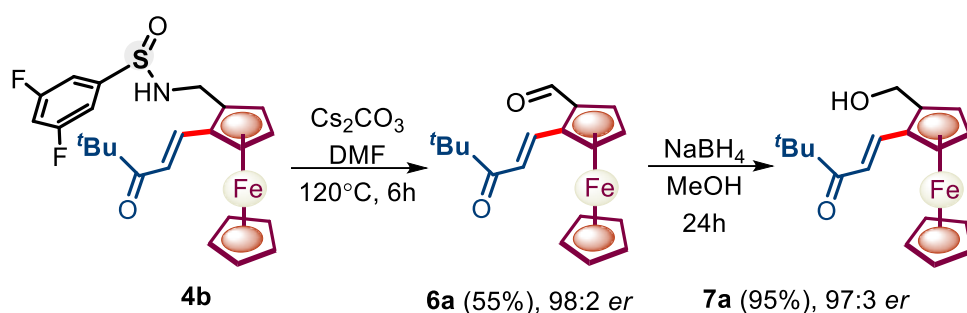

2-Alkenylated ferrocenyl amine **4b** (0.12 mmol, 1 equiv) and Cs<sub>2</sub>CO<sub>3</sub> (0.24 mmol, 2 equiv) were dissolved in DMF (2 mL, 0.06 M) solvent under open air atmosphere. The reaction was stirred at 110°C for 6 h. The organic layer was separated, and the aqueous layer was extracted with ethyl acetate. The combined organic phase was washed with brine and then dried over Na<sub>2</sub>SO<sub>4</sub>. Evaporation and column chromatography on basic silica gel (mesh 100-200) with the solvent mixture of hexanes: ethyl acetate (20: 80) afforded **6a**. Orange red solid, mp: 109 °C-110 °C. Yield: 24mg (55%). <sup>1</sup>H NMR (400 MHz, CDCl<sub>3</sub>) δ 10.20 (s, 1H), 7.92 (d, *J* = 15.8 Hz, 1H), 6.19 (d, *J* = 15.8 Hz, 1H), 4.99 (dd, *J* = 7.7, 6.4 Hz, 2H), 4.79 (t, *J* = 2.6 Hz, 1H), 4.31 (s, 5H), 1.56 (s, 9H). <sup>13</sup>C{<sup>1</sup>H} NMR (176 MHz, CDCl<sub>3</sub>) δ 192.7(C), 166.1(C), 140.5(CH), 120.3(CH), 81.4(C), 80.5(C), 78.2(C), 73.8(CH), 72.9(CH), 71.7(CH), 71.3(CH), 28.2(CH<sub>3</sub>). HRLCMS (ESI) *m/z*: [M+Na]<sup>+</sup> Calcd for C<sub>18</sub>H<sub>20</sub>FeO<sub>3</sub>Na 363.0654; Found 363.0641. Enantioselectivity of the product **6a** was determined by chiral HPLC analysis on AD-3 (hexane: isopropanol = 98:2, 1 mL/min, λ=254 nm).

Racemic sample (6a)

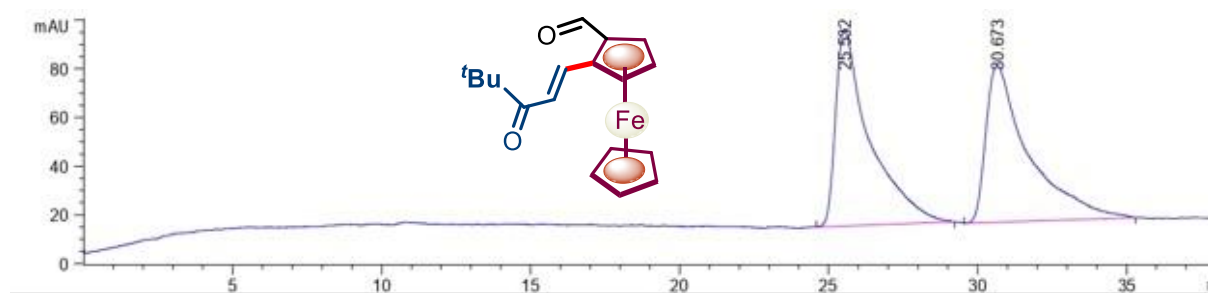

| Peak # | RetTime [min] | Type | Width [min] | Area [mAU*s] | Height [mAU] | Area %  |
|--------|---------------|------|-------------|--------------|--------------|---------|
| 1      | 25.532        | BB   | 1.0860      | 6411.56201   | 80.77689     | 50.0516 |
| 2      | 30.673        | BB   | 1.3307      | 6398.34717   | 63.98307     | 49.9484 |

Asymmetric sample (6a)

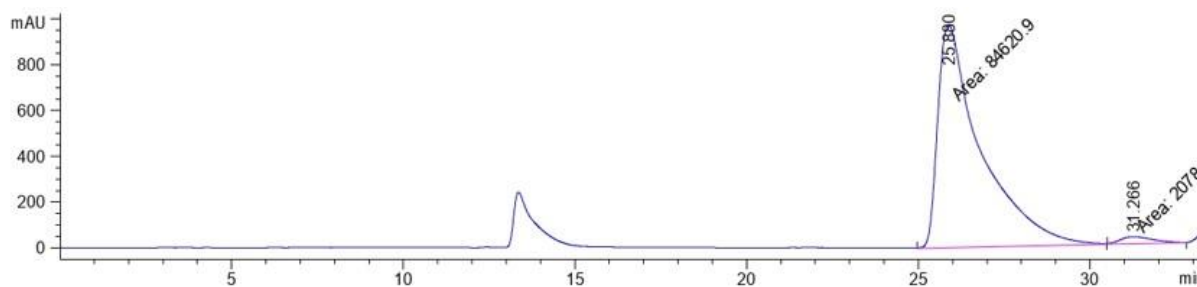

| Peak # | RetTime [min] | Type | Width [min] | Area [mAU*s] | Height [mAU] | Area %  |
|--------|---------------|------|-------------|--------------|--------------|---------|
| 1      | 25.880        | MM   | 1.4469      | 8.46209e4    | 974.71625    | 97.6027 |
| 2      | 31.266        | MM   | 1.1246      | 2078.46118   | 30.80349     | 2.3973  |

Further compound **6a** was reduced with NaBH<sub>4</sub> in MeOH solvent for 24 h to isolated compound **7a** before being quenched with 1M NaOH solution. The organic layer was separated, and the aqueous layer was extracted with ethyl acetate. The combined organic phase was washed with brine and then dried over Na<sub>2</sub>SO<sub>4</sub>. Evaporation and column chromatography on basic silica gel (mesh 100-200) with the solvent mixture of hexanes: ethyl acetate (30: 70) afforded an orange yellow solid **7a**, mp: 119 °C-120 °C. Yield: 32mg (95%). <sup>1</sup>H NMR (400 MHz, CDCl<sub>3</sub>) δ 7.60 (d, *J* = 12.7 Hz, 1H), 6.08 (d, *J* = 15.4 Hz, 1H), 4.60 (d, *J* = 4.0 Hz, 2H), 4.50 (brs, 2H), 4.42 (s, 1H), 4.18 (s, 5H), 2.05 (brs, 1H), 1.55 (s, 9H). <sup>13</sup>C{<sup>1</sup>H} NMR (176 MHz, CDCl<sub>3</sub>) δ 166.6 (C), 141.9 (CH), 118.1 (CH), 88.0 (C), 80.2 (C), 78.4 (C), 71.6 (CH), 70.0 (CH), 69.7 (CH), 67.6 (CH), 59.1 (CH<sub>2</sub>), 28.2 (CH<sub>3</sub>). HRLCMS (ESI-QTOF) *m/z*: [M+Na]<sup>+</sup> Calcd for C<sub>18</sub>H<sub>22</sub>FeO<sub>3</sub>Na 365.0811; Found 365.0825. Enantioselectivity of the product **7a** was determined by chiral HPLC analysis on OZ-3 (hexane: isopropanol = 70:30, 1 mL/min, λ=254 nm).

Racemic sample (7a)

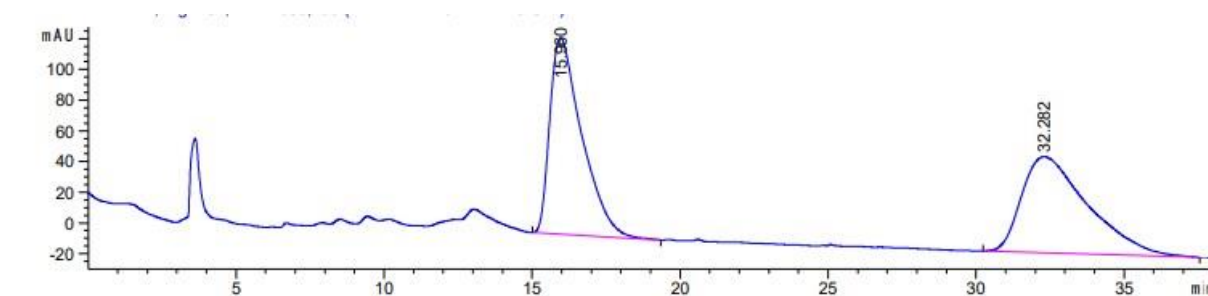

| Peak # | RetTime [min] | Type | Width [min] | Area [mAU*s] | Height [mAU] | Area %  |
|--------|---------------|------|-------------|--------------|--------------|---------|
| 1      | 15.960        | BB   | 1.0956      | 9627.60547   | 127.98519    | 49.8837 |
| 2      | 32.282        | BB   | 1.8876      | 9672.49707   | 62.42896     | 50.1163 |

Totals : 1.93001e4 190.41415

Asymmetric sample (7a)

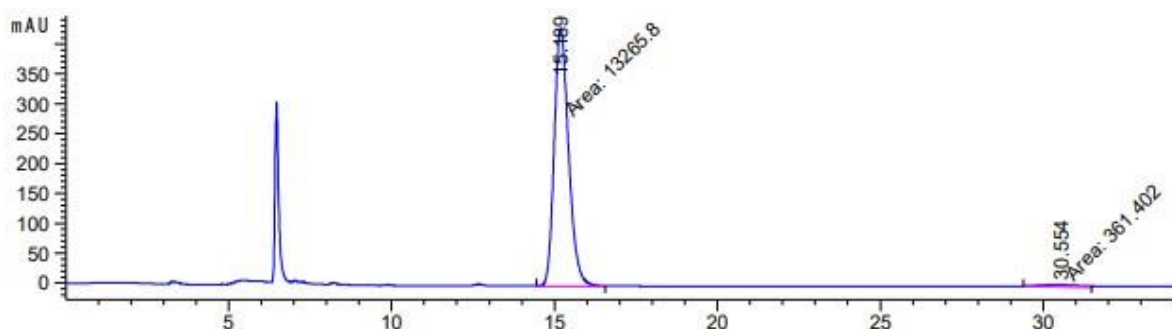

| Peak # | RetTime [min] | Type | Width [min] | Area [mAU*s] | Height [mAU] | Area %  |
|--------|---------------|------|-------------|--------------|--------------|---------|
| 1      | 15.189        | MM   | 0.5123      | 1.32658e4    | 431.53833    | 97.3479 |
| 2      | 30.554        | MM   | 1.5251      | 361.40231    | 3.94949      | 2.6521  |

Totals : 1.36272e4 435.48782

**Scheme S6.** Asymmetric thia-Michael reaction using post-derivatized ferrocene fused tetrahydropyridine **5a**.<sup>5</sup>

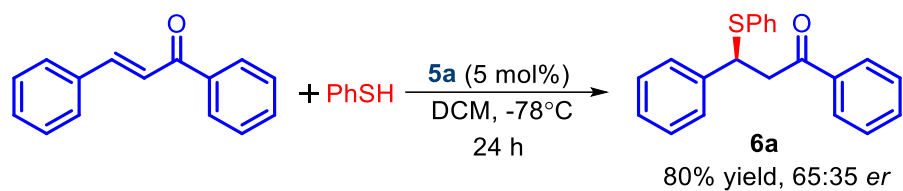

Racemic sample (**5a**)

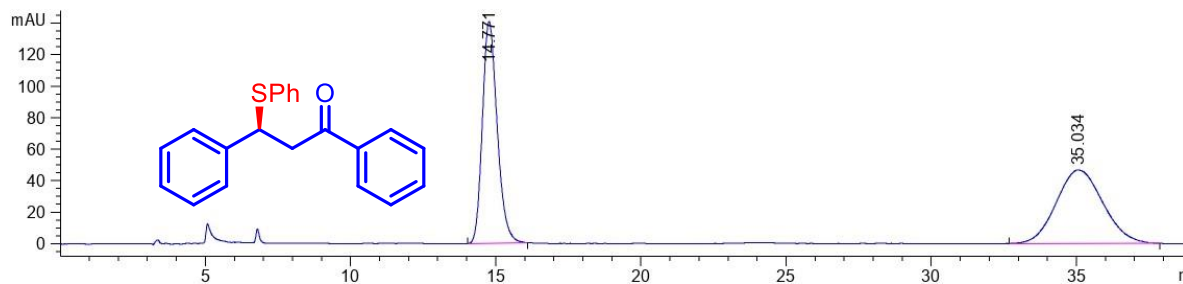

| Peak # | RetTime [min] | Type | Width [min] | Area [mAU*s] | Height [mAU] | Area %  |
|--------|---------------|------|-------------|--------------|--------------|---------|
| 1      | 14.771        | BB   | 0.5434      | 4992.38965   | 140.87692    | 48.9066 |
| 2      | 35.034        | BB   | 1.4294      | 5215.62061   | 46.68568     | 51.0934 |

Asymmetric sample (**5a**)

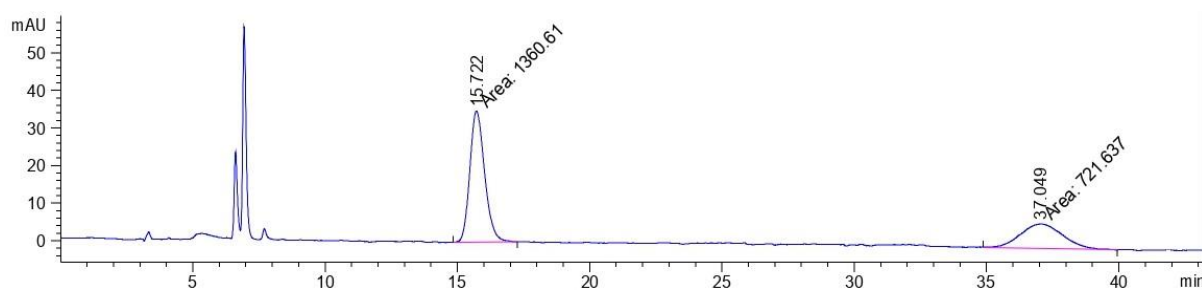

| Peak # | RetTime [min] | Type | Width [min] | Area [mAU*s] | Height [mAU] | Area %  |
|--------|---------------|------|-------------|--------------|--------------|---------|
| 1      | 15.722        | MM   | 0.6497      | 1360.60925   | 34.90311     | 65.3433 |
| 2      | 37.049        | MM   | 1.8342      | 721.63727    | 6.55738      | 34.6567 |

## Mechanistic Investigation

### Control Experiment 1: Removal of cation from the catalytic cycle

#### (A). Control Experiment

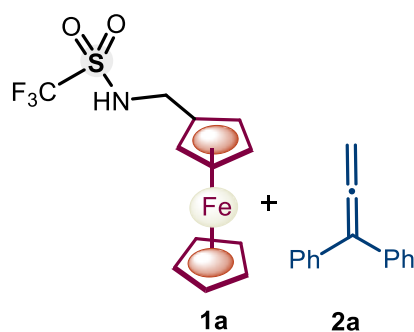

|     |                                                                                                              |                                                         |
|-----|--------------------------------------------------------------------------------------------------------------|---------------------------------------------------------|
| (a) | Standard conditions<br>+ $\text{H}_2\text{O}$ (10 equiv)                                                     | $\rightarrow$ <b>3a</b> (28%), 64:36 <i>er</i>          |
| (b) | Standard conditions<br>+ $\text{KF}$ (2 equiv),<br>Instead of $\text{CsF}$<br>+ 18 Crownether<br>(2.5 equiv) | $\rightarrow$ <b>3a</b> (29%), 73:27 <i>er</i>          |
| (c) | Standard conditions<br>+ Without $\text{CsF}$                                                                | $\rightarrow$ <b>3a</b> (4%), 50:50 <i>er</i>           |
| (d) | Standard conditions<br>+ TBAF or TBAB<br>Instead of $\text{CsF}$                                             | $\rightarrow$ <b>3a</b> ~ (8%),<br>and ~55:45 <i>er</i> |
| (e) | Standard conditions<br>+ <b>L12</b> Instead of <b>L10</b>                                                    | $\rightarrow$ <b>3a</b> (10%), 57:43 <i>er</i>          |

In a Schlenk tube,  $\text{Pd}(\text{OAc})_2$  (2.5 mg, 0.012 mmol, 8 mol%), NOBINAc (14 mg, 0.04 mmol, 28 mol%), CuO (12 mg, 0.14 mmol, 1 equiv.), CsF (44 mg, 0.29 mmol, 2 equiv.), and *N*-Methylferrocenyl 1,1,1-trifluoromethanesulfonamide **1a** (50 mg, 0.14 mmol, 1 equiv.) were dissolved in dry THF (1.5 mL) under inert atmosphere and was stirred for 10 min. After pre-stirring, 10 equiv of  $\text{H}_2\text{O}$  or 2.5 equiv of 18 crown ether and allene **2a** (55  $\mu\text{L}$ , 0.29 mmol, 2 equiv.) was added to it. The tube was sealed with a rubber septum, maintaining a dry air atmosphere in the flask with a balloon. The reaction was heated at 75° C, stirred for 18 h, and then cooled to room temperature. The crude reaction mixture was passed through a celite pad, then evaporation and column chromatography on silica gel (mesh 230-400) in (hexane: ethyl acetate; 95:5) afforded **3a**.

**Control Experiment 2:** Stoichiometric  $^{19}\text{F}$  NMR experiment with different cation sources.

In NMR tube  $\text{Pd}(\text{OAc})_2$  (6.7 mg, 0.03 mmol, 1 equiv.), NOBINAc (9.8 mg, 0.03 mmol, 1 equiv.),  $\text{M}_2\text{CO}_3$  (0.045 mmol, 1.5 equiv.), and *N*-Methylferrocenyl 1,1,1-trifluoromethanesulfonamide **1a** (10 mg, 0.03 mmol, 1 equiv.) was added in (0.8 mL)  $\text{CDCl}_3$ . Further heated for 60 min, then submitted for  $^{19}\text{F}$  NMR. A new peak at -76.07 ppm corresponding to  $\text{CF}_3$  of **1a** emerges and increases to a maximum with the increase of the size of the cations (Li, Na, and Cs), which could be attributed to initial C-H activated species.

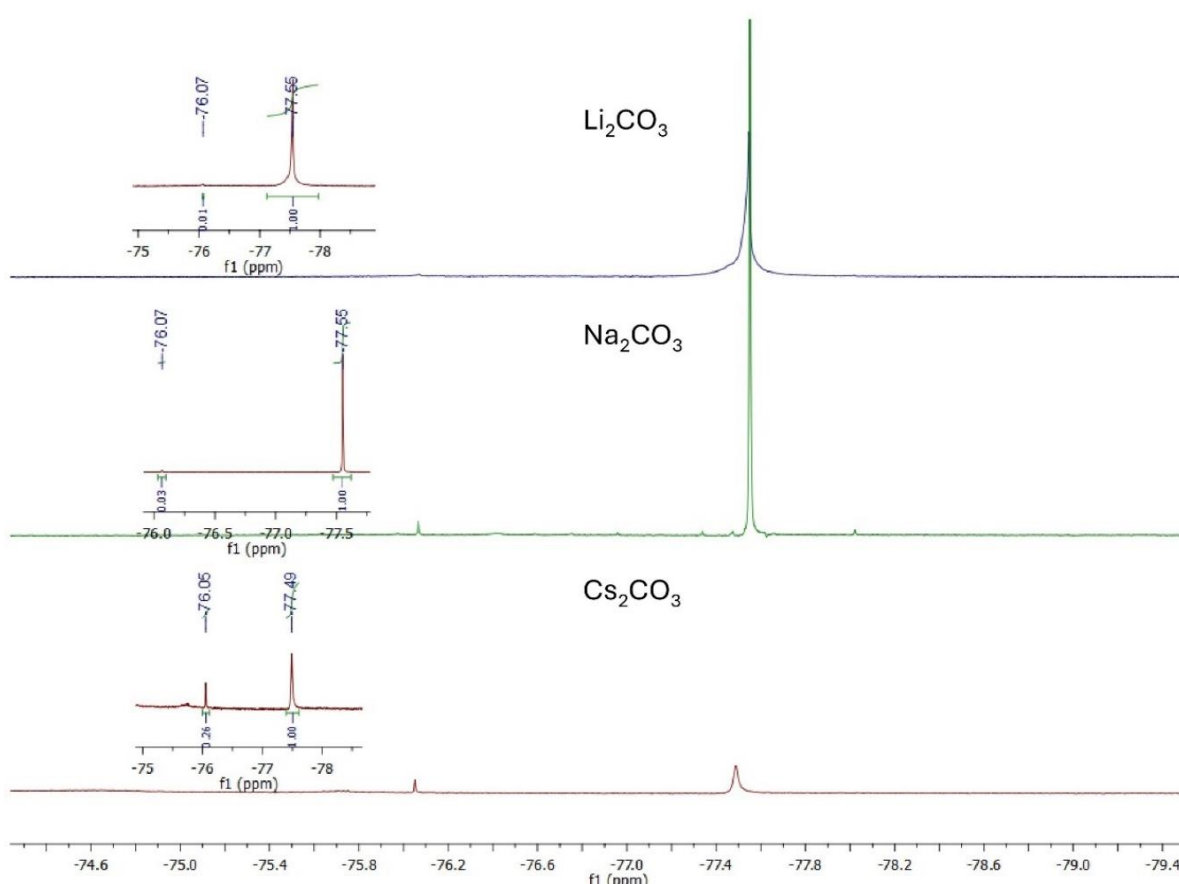



### Control Experiment 3: Ligand acceleration experiment.

In a Schlenk tube, Pd(OAc)<sub>2</sub> (2.5 mg, 0.012 mmol, 8 mol%), NOBINAc (14 mg, 0.04 mmol, 28 mol%), CuO (11.5 mg, 0.14 mmol, 1 equiv.), CsF (44 mg, 0.29 mmol, 2 equiv.), and *N*-Methylferrocenyl 1,1,1-trifluoromethanesulfonamide **1a** (50 mg, 0.14 mmol, 1 equiv.) were mixed in dry THF (1.5 mL) and without ligand stirred for 10 min under dry air atmosphere. After pre-stirring of 10 min, allene **2a** (55 μL, 0.29 mmol, 2 equiv.) was added to it. The tube was sealed with a rubber septum, maintaining the dry air atmosphere in the flask with a balloon, and further reaction mixture was heated at 75 °C. Next, after a regular interval of 15 min, a 250 μL reaction aliquot was pumped out, and then the crude reaction mixture was passed through a celite pad. After the evaporation of the solvent, the crude sample was submitted for <sup>19</sup>F NMR.

#### Ligand Acceleration experiment

| S. NO> | Time (Mins) | Fractional Conversion (19F-NMR) with NOBINAc Ligand | Fractional Conversion (19F-NMR) without NOBINAc ligand |
|--------|-------------|-----------------------------------------------------|--------------------------------------------------------|
| 1      | 15          | 0.1304                                              | 0.0651                                                 |
| 2      | 30          | 0.1667                                              | 0.0825                                                 |
| 3      | 45          | 0.1935                                              | 0.0991                                                 |
| 4      | 60          | 0.2000                                              | 0.0991                                                 |
| 5      | 90          | 0.2424                                              | 0.115                                                  |

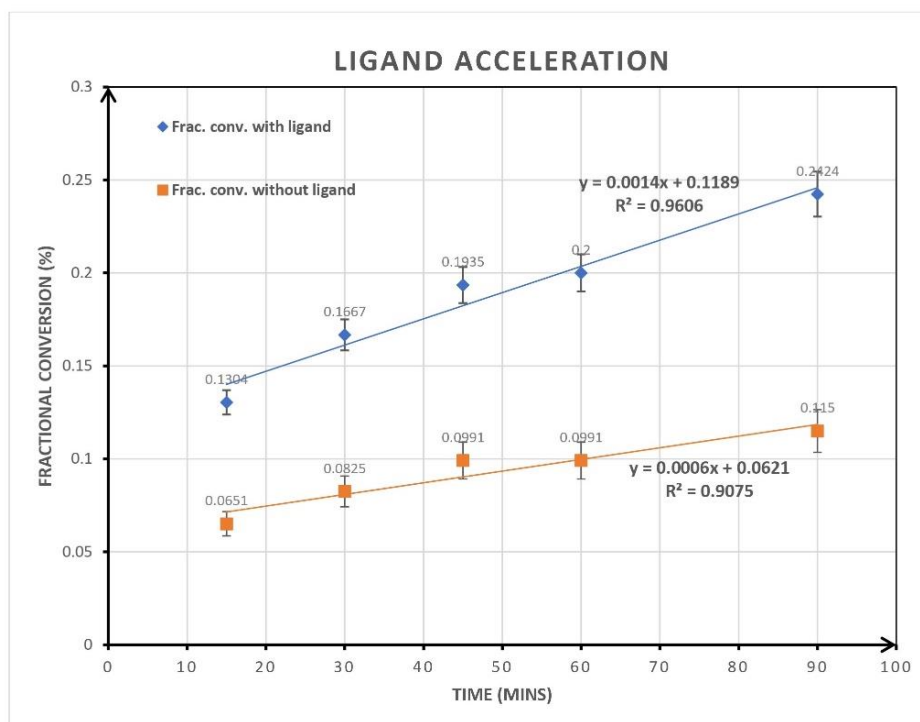

## Computational Studies

Computational studies were performed with the Gaussian 09 Revision A.02 program suite with the DFT method of Becke's three-parameter hybrid Hartree-Fock procedure with the Lee Yang-Parr correlation function (B3LYP). The geometry optimization and energy calculations of the reactants, intermediates, and transition state were fully optimized by the DFT/B3LYP method with LANL2DZ basis set in the solution phase using CPCM (conductor-like Polarizable Continuum Model) model in tetrahydrofuran (THF) solvent. Energy obtained from computation is listed in Hartree and converted to kcal/mol. The difference between the favorable and unfavorable transition states is 10.45 kcal/mol.

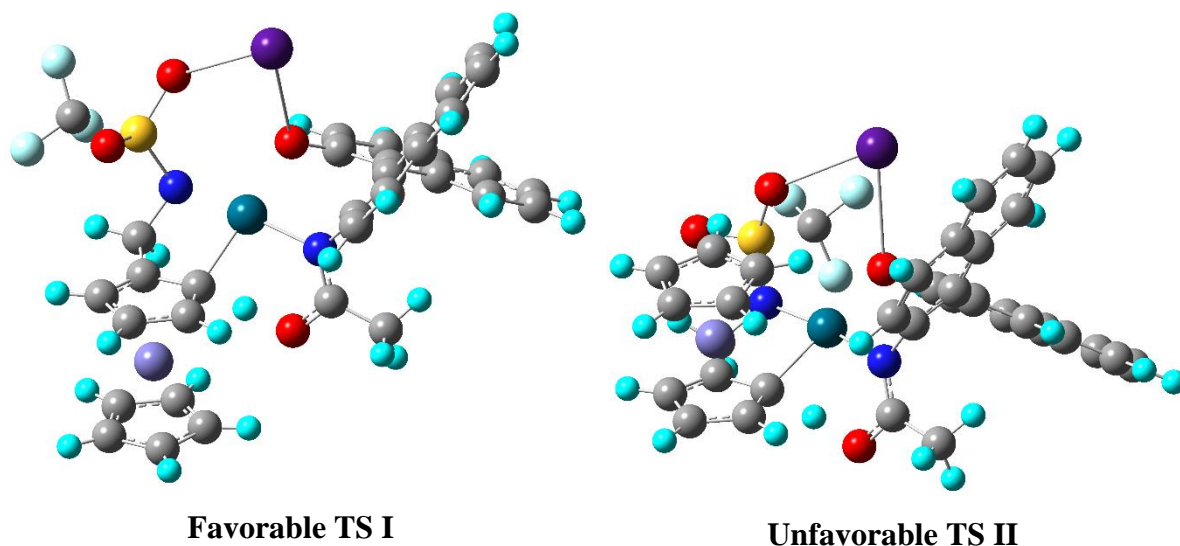

**Figure S5.** Optimized structure of favorable and unfavorable transition states

### Energy Data

| Structure    | Electronic and Thermal Correction to $G_{\text{solv}}$ | $\Delta G_{\text{solv}}$ |
|--------------|--------------------------------------------------------|--------------------------|
| <b>TS I</b>  | -2300.642230                                           | 0.00 kcal/mol            |
| <b>TS II</b> | -2300.625582                                           | +10.45 kcal/mol          |

Relative energies were calculated at the level of B3LYP/LANL2DZ/CPCM(THF) at 298K

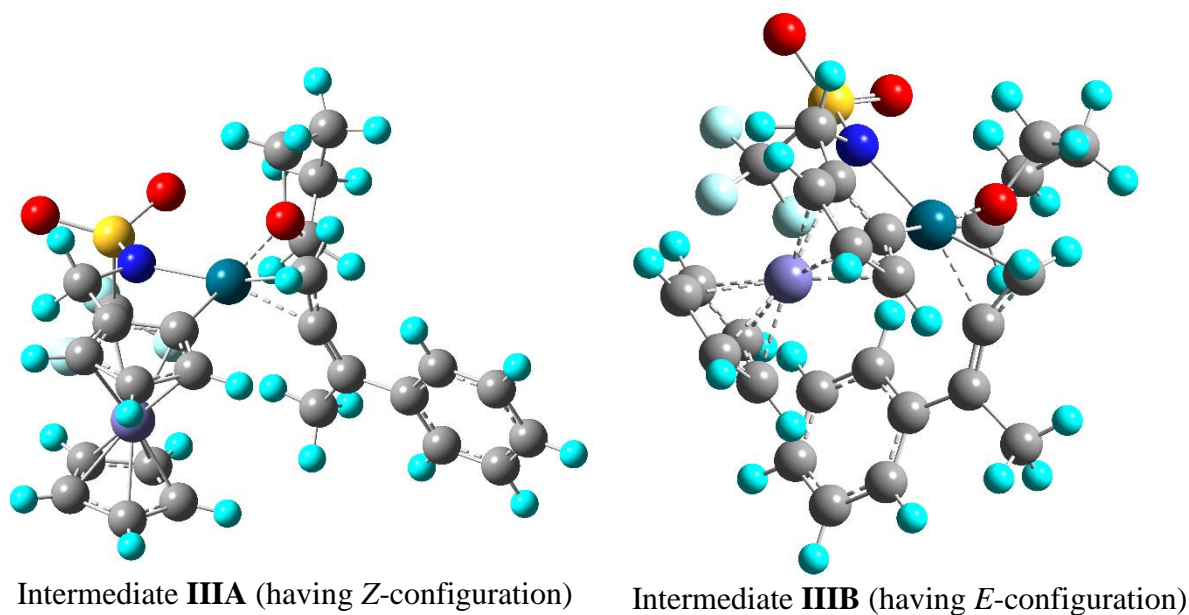

**Figure S6.** Optimized structure of Intermediate **III** having *Z*- and *E*-configurations

### Energy Data

| Structure                | Electronic and Thermal Correction to $G_{\text{solv}}$ | $\Delta G_{\text{solv}}$ |
|--------------------------|--------------------------------------------------------|--------------------------|
| <b>Intermediate IIIA</b> | -1847.021831                                           | 0.00 kcal/mol            |
| <b>Intermediate IIIB</b> | -1847.016332                                           | +3.45 kcal/mol           |

Relative energies were calculated at the level of B3LYP/LANL2DZ/CPCM(THF) at 298K

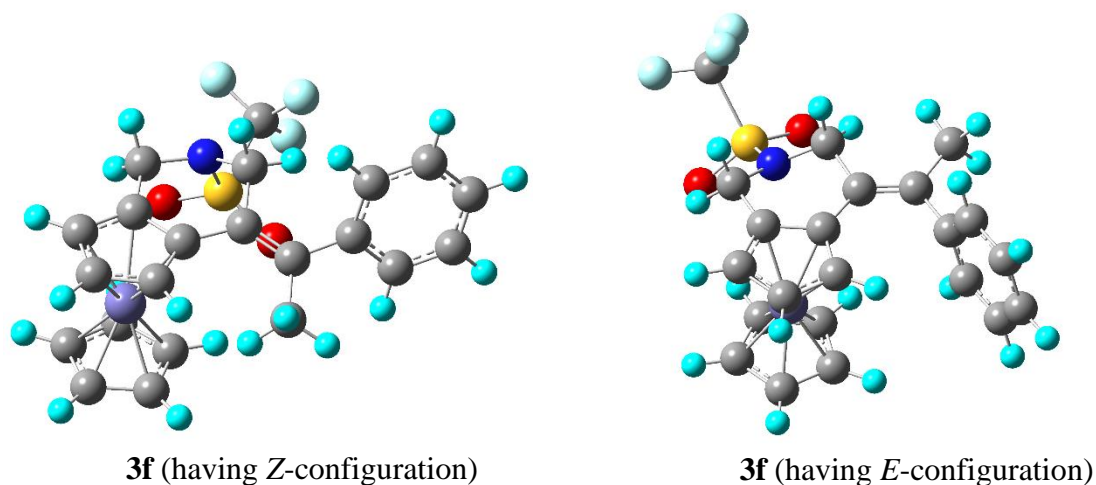

**Figure S7.** Optimized structure of **3f** having *Z*- and *E*-configurations

## Energy Data

| Structure    | Electronic and Thermal Correction to $G_{\text{solv}}$ | $\Delta G_{\text{solv}}$ |
|--------------|--------------------------------------------------------|--------------------------|
| <i>Z</i> -3f | -1487.952045                                           | 0.00 kcal/mol            |
| <i>E</i> -3f | -1487.949645                                           | +1.51 kcal/mol           |

Relative energies were calculated at the level of B3LYP/LANL2DZ/CPCM(THF) at 298K

## Molecular Orbital Picture:

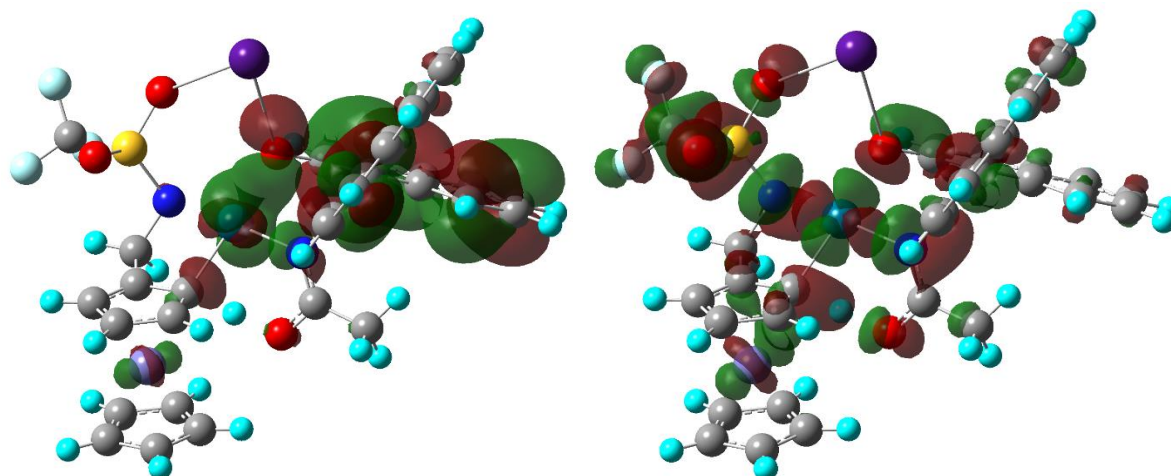

**Figure S8.** Pictorial view of HOMO (left) and LUMO (right) of favorable **TS I**

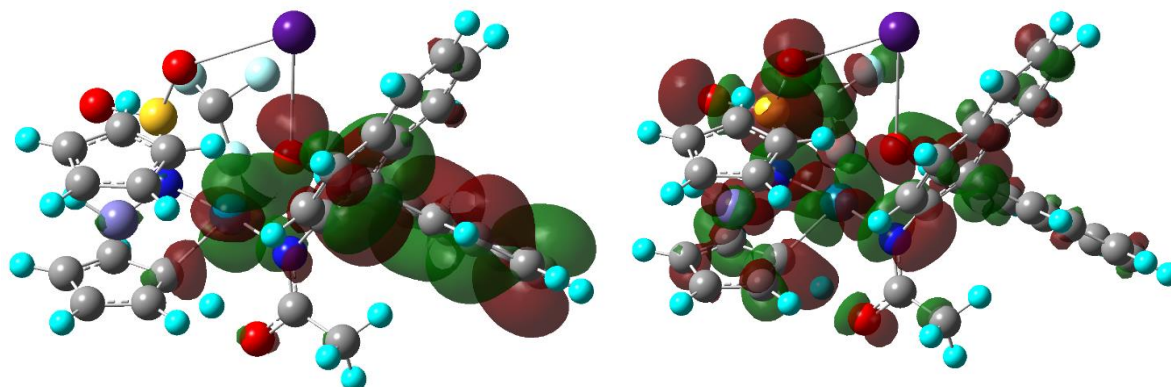

**Figure S9.** Pictorial view of HOMO (left) and LUMO (right) of unfavorable **TS II**



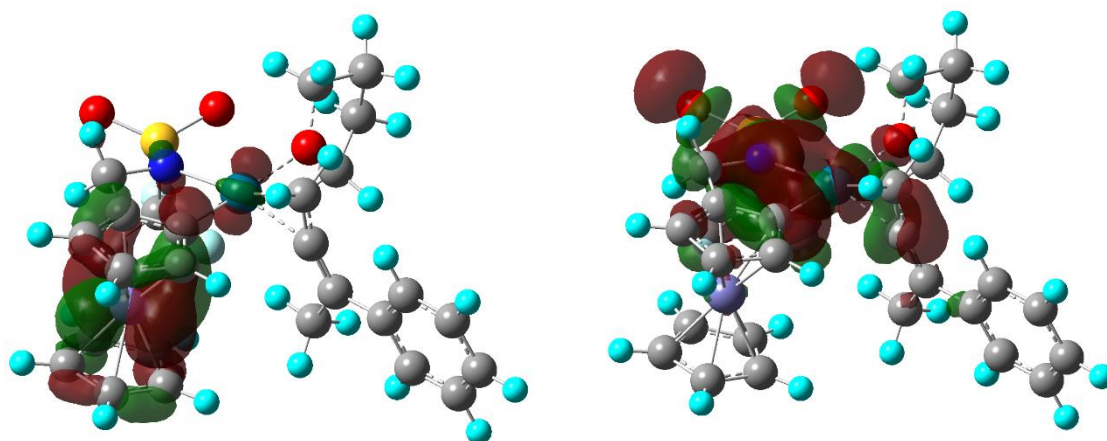

**Figure S10.** Pictorial view of HOMO (left) and LUMO (right) of intermediate **IIIA**

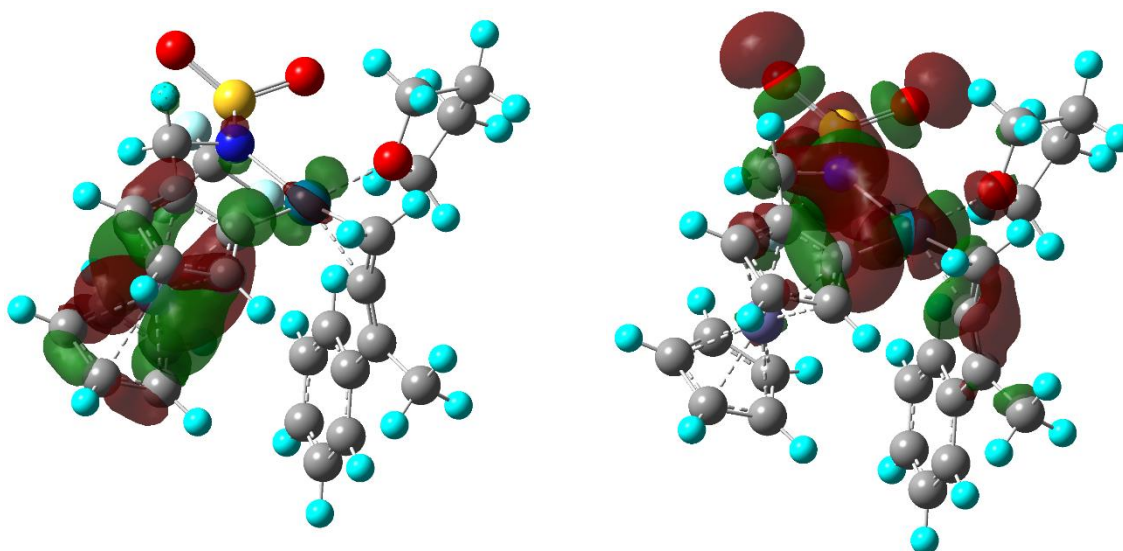

**Figure S11.** Pictorial view of HOMO (left) and LUMO (right) of intermediate **IIIB**

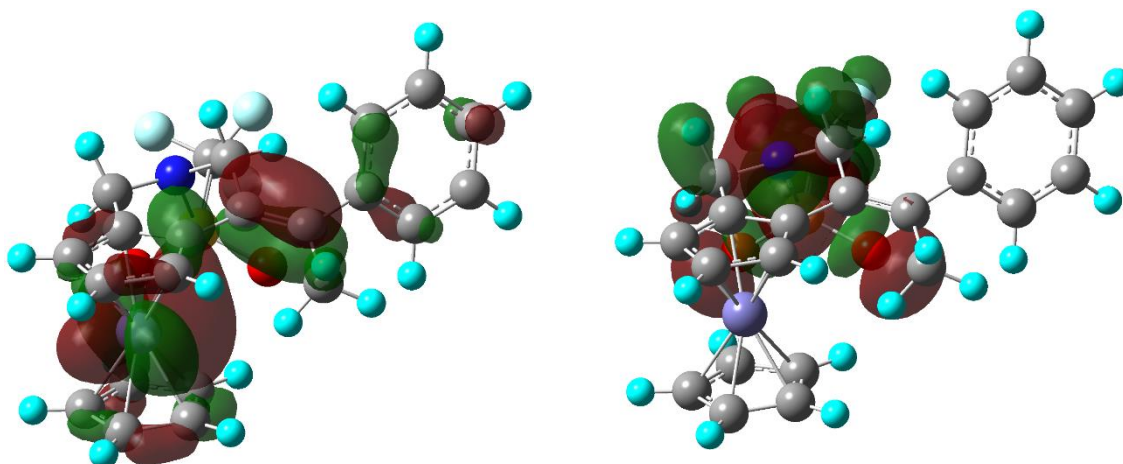

**Figure S12.** Pictorial view of HOMO (left) and LUMO (right) of **Z-3f**

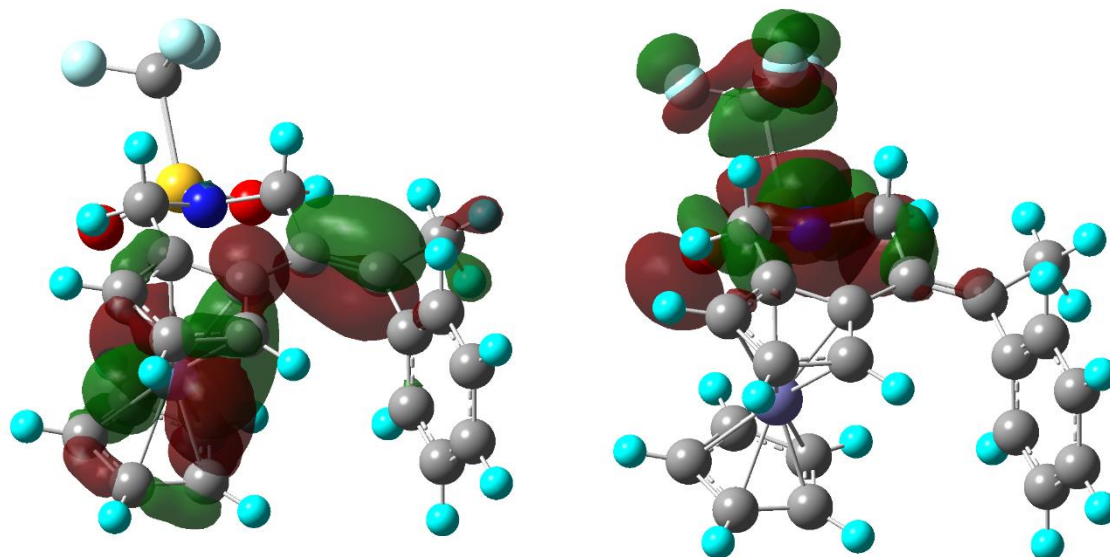

**Figure S13.** Pictorial view of HOMO (left) and LUMO (right) of *E-3f*

### Co-ordinates of Optimized Structures

#### Favourable TS I

Electronic + Thermal Free Energies: -2300.642230

Correction to Gibb's free energy: 0.442038

Zero-point correction: 0.524528

Imaginary vibration frequency: 1 (associated imaginary frequency  $i1194.80\text{ cm}^{-1}$ )

| Symbol | Coordinates (Å) |          |           |
|--------|-----------------|----------|-----------|
|        | X               | Y        | Z         |
| Fe     | -4.265047       | 2.028064 | -0.686603 |
| C      | -5.079536       | 3.932474 | -1.188275 |
| C      | -4.083269       | 0.716786 | -2.376747 |
| C      | -4.045281       | 4.077343 | -0.195105 |
| C      | -6.112616       | 3.084834 | -0.641393 |
| C      | -4.440711       | 3.321308 | 0.974158  |
| C      | -5.721769       | 2.715947 | 0.698221  |
| H      | -5.070950       | 4.363153 | -2.180155 |
| H      | -4.644861       | 0.817096 | -3.296013 |
| H      | -3.112254       | 4.607561 | -0.312518 |

|   |           |           |           |
|---|-----------|-----------|-----------|
| H | -7.017910 | 2.781889  | -1.148952 |
| H | -3.872687 | 3.223380  | 1.888660  |
| H | -6.282309 | 2.080567  | 1.370129  |
| S | -1.946794 | -2.866145 | 0.364482  |
| O | -0.548318 | -3.648235 | 0.687695  |
| O | -2.554965 | -3.137380 | -1.134845 |
| C | -4.502381 | -0.028314 | -1.213017 |
| H | -5.410791 | -0.608412 | -1.121309 |
| C | -3.498452 | 0.137025  | -0.204466 |
| C | -3.277906 | -3.875807 | 1.551552  |
| C | -3.297133 | -0.572934 | 1.098476  |
| H | -4.097648 | -1.283273 | 1.330144  |
| H | -3.226270 | 0.125825  | 1.941137  |
| F | -4.572052 | -3.781340 | 1.049750  |
| F | -3.270907 | -3.392710 | 2.853665  |
| F | -2.923225 | -5.214130 | 1.581281  |
| N | -1.909260 | -1.216676 | 1.100749  |
| C | -2.409989 | 0.966889  | -0.731947 |
| H | -1.763469 | 2.036446  | -0.168241 |
| C | 1.932707  | -0.020601 | 1.593877  |
| C | 2.862113  | 0.851869  | 0.987643  |
| C | 1.854731  | -0.090099 | 3.027647  |
| C | 3.662534  | 1.726273  | 1.803748  |
| C | 2.652605  | 0.709529  | 3.826764  |
| H | 1.146289  | -0.792754 | 3.459660  |
| C | 4.556121  | 2.703688  | 1.248038  |
| C | 3.563453  | 1.648072  | 3.244001  |
| H | 2.585362  | 0.644556  | 4.911020  |
| C | 5.311770  | 3.537894  | 2.064130  |
| H | 4.636524  | 2.794496  | 0.168848  |

|    |           |           |           |
|----|-----------|-----------|-----------|
| C  | 4.360924  | 2.511792  | 4.057377  |
| C  | 5.222875  | 3.441129  | 3.485942  |
| H  | 5.977332  | 4.273244  | 1.618003  |
| H  | 4.275609  | 2.434208  | 5.139598  |
| H  | 5.823040  | 4.096385  | 4.111953  |
| C  | 2.947686  | 0.862983  | -0.509614 |
| C  | 4.130278  | 0.410274  | -1.207170 |
| C  | 1.845622  | 1.285105  | -1.266157 |
| C  | 5.267196  | -0.118672 | -0.510214 |
| C  | 4.183623  | 0.467057  | -2.652096 |
| C  | 1.900319  | 1.330151  | -2.695305 |
| C  | 6.394035  | -0.553070 | -1.196953 |
| H  | 5.236365  | -0.183037 | 0.572529  |
| C  | 5.363954  | 0.022664  | -3.329877 |
| C  | 3.047003  | 0.946568  | -3.373869 |
| H  | 1.020564  | 1.667409  | -3.236843 |
| C  | 6.449930  | -0.476065 | -2.621974 |
| H  | 7.242724  | -0.953992 | -0.648508 |
| H  | 5.393310  | 0.076841  | -4.416083 |
| H  | 3.086742  | 0.992609  | -4.459725 |
| H  | 7.340931  | -0.812440 | -3.145642 |
| N  | 0.601216  | 1.619939  | -0.633552 |
| C  | 0.182571  | 2.870501  | -0.458663 |
| Pd | -0.607700 | 0.103074  | 0.098977  |
| O  | -1.038406 | 3.096083  | -0.005303 |
| C  | 1.032803  | 4.082527  | -0.771352 |
| H  | 0.779504  | 4.464738  | -1.768751 |
| H  | 0.808717  | 4.869805  | -0.045751 |
| H  | 2.100243  | 3.852428  | -0.748415 |
| O  | 1.115778  | -0.831468 | 0.846224  |



|    |           |           |           |
|----|-----------|-----------|-----------|
| Cs | 2.052272  | -3.235204 | -0.870806 |
| C  | -2.809848 | 1.315606  | -2.094773 |
| H  | -2.251471 | 1.949158  | -2.771904 |

---

### Unfavorable TS II

Electronic + Thermal Free Energies: -2300.625582

Correction to Gibb's free energy: 0.439285

Zero-point correction: 0.519781

Imaginary vibration frequency: 1 (associated imaginary frequency  $i1154.52 \text{ cm}^{-1}$ )

---

| Symbol | Coordinates (Å) |           |           |
|--------|-----------------|-----------|-----------|
|        | X               | Y         | Z         |
| Fe     | -3.547423       | -1.747050 | 0.278059  |
| C      | -2.914930       | -2.722843 | 2.041762  |
| C      | -2.981479       | -2.923705 | -1.325416 |
| C      | -4.344991       | -2.510580 | 2.064704  |
| C      | -2.278409       | -1.432166 | 1.966789  |
| C      | -4.583748       | -1.087082 | 1.997317  |
| C      | -3.306437       | -0.421211 | 1.932263  |
| H      | -2.413998       | -3.680339 | 2.065112  |
| H      | -2.350872       | -3.800141 | -1.279492 |
| H      | -5.101761       | -3.281830 | 2.099170  |
| H      | -1.214339       | -1.261013 | 1.908274  |
| H      | -5.552554       | -0.607796 | 1.975548  |
| H      | -3.130960       | 0.641252  | 1.864643  |
| S      | -2.404613       | 2.616511  | -0.187767 |
| O      | -1.827037       | 2.504162  | 1.337111  |
| O      | -3.820826       | 3.418932  | -0.358613 |
| H      | -1.484233       | -1.777325 | -2.464042 |
| C      | -3.700326       | -0.723218 | -1.619486 |

|   |           |           |           |
|---|-----------|-----------|-----------|
| C | -1.026567 | 3.912381  | -1.016331 |
| C | -3.622965 | 0.769870  | -1.771547 |
| H | -4.499452 | 1.264640  | -1.341718 |
| H | -3.559257 | 1.048688  | -2.832850 |
| F | -0.690136 | 3.497600  | -2.296984 |
| F | 0.123427  | 4.016143  | -0.248716 |
| F | -1.591266 | 5.181131  | -1.111301 |
| N | -2.352266 | 1.174945  | -1.073655 |
| C | -4.857205 | -1.534946 | -1.380884 |
| H | -5.877580 | -1.183998 | -1.313375 |
| C | 1.818370  | 0.896550  | -1.100497 |
| C | 2.715355  | -0.148697 | -0.794120 |
| C | 2.167079  | 1.843010  | -2.124398 |
| C | 3.926669  | -0.306183 | -1.550982 |
| C | 3.349677  | 1.729418  | -2.834241 |
| H | 1.465025  | 2.644551  | -2.323881 |
| C | 4.833008  | -1.398347 | -1.333631 |
| C | 4.255434  | 0.650263  | -2.581861 |
| H | 3.597371  | 2.455518  | -3.606282 |
| C | 5.995875  | -1.528333 | -2.083941 |
| H | 4.599975  | -2.135522 | -0.570802 |
| C | 5.462272  | 0.495502  | -3.331987 |
| C | 6.322294  | -0.570978 | -3.092575 |
| H | 6.665395  | -2.366307 | -1.904487 |
| H | 5.695177  | 1.227328  | -4.103235 |
| H | 7.236725  | -0.683371 | -3.669407 |
| C | 2.359426  | -1.112560 | 0.294397  |
| C | 3.075969  | -1.145783 | 1.543284  |
| C | 1.271979  | -1.972049 | 0.121021  |
| C | 4.157915  | -0.245710 | 1.821438  |

|    |           |           |           |
|----|-----------|-----------|-----------|
| C  | 2.681923  | -2.082280 | 2.570010  |
| C  | 0.893222  | -2.911054 | 1.127475  |
| C  | 4.806635  | -0.265327 | 3.050014  |
| H  | 4.459559  | 0.463475  | 1.056969  |
| C  | 3.378166  | -2.087866 | 3.820264  |
| C  | 1.589846  | -2.972552 | 2.322992  |
| H  | 0.041275  | -3.557807 | 0.937763  |
| C  | 4.417405  | -1.197552 | 4.061058  |
| H  | 5.619471  | 0.429276  | 3.246363  |
| H  | 3.074400  | -2.798884 | 4.585498  |
| H  | 1.299705  | -3.683217 | 3.093172  |
| H  | 4.937530  | -1.204957 | 5.015353  |
| N  | 0.427896  | -1.826516 | -1.024440 |
| C  | 0.458350  | -2.580810 | -2.115563 |
| Pd | -0.895393 | -0.283434 | -0.957651 |
| O  | -0.474462 | -2.420576 | -3.040846 |
| C  | 1.511729  | -3.638503 | -2.347054 |
| H  | 1.108492  | -4.623929 | -2.081908 |
| H  | 1.774084  | -3.655504 | -3.408566 |
| H  | 2.407683  | -3.452337 | -1.749408 |
| O  | 0.630793  | 1.058168  | -0.431717 |
| Cs | 0.900670  | 1.998363  | 2.552558  |
| C  | -4.416096 | -2.906601 | -1.237767 |
| H  | -5.054815 | -3.762103 | -1.068716 |
| C  | -2.508680 | -1.561649 | -1.616085 |

---

**Intermediate IIIA** (having *Z*-configuration)

Electronic + Thermal Free Energies: -1847.021831

Correction to Gibb's free energy: 0.415488

Zero-point correction: 0.489278

Imaginary vibration frequency: 0

| Symbol | Coordinates (Å) |          |           |
|--------|-----------------|----------|-----------|
|        | X               | Y        | Z         |
| C      | -0.631474       | 2.572058 | 1.831908  |
| C      | -1.877480       | 3.194105 | 1.454663  |
| C      | -1.577963       | 4.496181 | 0.909154  |
| C      | -0.145861       | 4.678076 | 0.946397  |
| C      | 0.439552        | 3.487119 | 1.514884  |
| H      | -0.524522       | 1.594325 | 2.277702  |
| H      | -2.861014       | 2.759551 | 1.562849  |
| H      | -2.299051       | 5.206697 | 0.528787  |
| H      | 0.393504        | 5.548238 | 0.598250  |
| H      | 1.495058        | 3.314268 | 1.672503  |
| C      | -0.115458       | 3.470510 | -2.239938 |
| C      | -1.503431       | 3.067806 | -2.176742 |
| C      | 0.701004        | 2.369270 | -1.775209 |
| H      | 0.248543        | 4.435698 | -2.564640 |
| C      | -1.540811       | 1.714771 | -1.679455 |
| H      | -2.355638       | 3.674819 | -2.450264 |
| C      | -0.183114       | 1.273689 | -1.451878 |
| H      | 1.779276        | 2.374470 | -1.702262 |
| Fe     | -0.631607       | 3.000188 | -0.256345 |
| C      | -2.693248       | 0.783609 | -1.457868 |
| H      | -3.447989       | 1.212727 | -0.788428 |
| H      | -3.194970       | 0.537610 | -2.403977 |

|    |           |           |           |
|----|-----------|-----------|-----------|
| Cs | 0.038966  | -0.632702 | -0.953935 |
| N  | -2.066115 | -0.467862 | -0.883833 |
| S  | -3.183927 | -1.496671 | -0.100958 |
| C  | -3.192459 | -0.964546 | 1.883409  |
| F  | -3.672628 | 0.335040  | 2.032322  |
| F  | -1.899009 | -1.007951 | 2.404533  |
| F  | -3.991396 | -1.815151 | 2.632520  |
| O  | -4.738505 | -1.212350 | -0.520654 |
| O  | -2.675564 | -3.039979 | -0.007394 |
| C  | -0.065802 | -3.831248 | -1.574188 |
| C  | 0.402332  | -3.409213 | 0.788049  |
| C  | 0.301460  | -5.158811 | -0.898548 |
| H  | 0.492699  | -3.624875 | -2.491322 |
| H  | -1.142100 | -3.740577 | -1.744915 |
| C  | -0.009192 | -4.880527 | 0.595246  |
| H  | -0.275745 | -2.856626 | 1.441361  |
| H  | 1.436922  | -3.298359 | 1.130146  |
| H  | 1.365335  | -5.384392 | -1.040236 |
| H  | -0.286869 | -5.991838 | -1.296123 |
| H  | -1.080999 | -4.997045 | 0.783207  |
| H  | 0.542812  | -5.546615 | 1.265692  |
| O  | 0.330251  | -2.797786 | -0.574378 |
| C  | 2.190737  | -0.422746 | -0.594768 |
| C  | 2.822727  | -0.231388 | 0.567989  |
| C  | 2.016326  | -0.704415 | -1.930675 |
| H  | 2.016193  | 0.078608  | -2.686166 |
| H  | 2.104289  | -1.728045 | -2.293103 |
| C  | 2.056858  | -0.075161 | 1.872409  |
| H  | 2.284937  | 0.884419  | 2.353287  |
| H  | 0.980832  | -0.127031 | 1.697804  |

|   |          |           |           |
|---|----------|-----------|-----------|
| H | 2.326828 | -0.871333 | 2.578505  |
| C | 4.324044 | -0.176088 | 0.609043  |
| C | 4.996447 | -0.034385 | 1.848645  |
| C | 5.111847 | -0.260485 | -0.568798 |
| C | 6.401905 | 0.017168  | 1.909464  |
| H | 4.432625 | 0.035843  | 2.772886  |
| C | 6.513336 | -0.209880 | -0.508051 |
| H | 4.630385 | -0.362214 | -1.536878 |
| C | 7.169337 | -0.070951 | 0.733257  |
| H | 6.893361 | 0.125781  | 2.873144  |
| H | 7.093928 | -0.276022 | -1.424870 |
| H | 8.254517 | -0.030543 | 0.779815  |

-----

**Intermediate IIIB** (having *E*-configuration)

Electronic + Thermal Free Energies: -1847.016332

Correction to Gibb's free energy: 0.416874

Zero-point correction: 0.489341

Imaginary vibration frequency: 0

-----

| Symbol | Coordinates (Å) |           |           |
|--------|-----------------|-----------|-----------|
|        | X               | Y         | Z         |
| C      | -2.911143       | -1.799234 | 1.405372  |
| C      | -4.123512       | -2.139802 | 0.700115  |
| C      | -4.754013       | -0.911212 | 0.276206  |
| C      | -3.930545       | 0.188089  | 0.721196  |
| C      | -2.793990       | -0.360942 | 1.421409  |
| H      | -2.211773       | -2.497465 | 1.842876  |
| H      | -4.489860       | -3.139664 | 0.511134  |
| H      | -5.674021       | -0.830665 | -0.286470 |

-----

|    |           |           |           |
|----|-----------|-----------|-----------|
| H  | -4.128141 | 1.238196  | 0.556602  |
| H  | -1.995833 | 0.207149  | 1.874457  |
| C  | -3.093159 | -1.156139 | -2.668842 |
| C  | -2.398427 | -2.341198 | -2.216236 |
| C  | -2.290808 | -0.000134 | -2.330017 |
| H  | -4.055770 | -1.137071 | -3.161300 |
| C  | -1.163341 | -1.915720 | -1.605841 |
| H  | -2.745533 | -3.360559 | -2.316648 |
| C  | -1.083340 | -0.474942 | -1.693659 |
| H  | -2.550855 | 1.027744  | -2.538584 |
| Fe | -2.825097 | -1.069308 | -0.586879 |
| C  | -0.035486 | -2.717735 | -1.031528 |
| H  | -0.356954 | -3.330123 | -0.180616 |
| H  | 0.392473  | -3.395641 | -1.782439 |
| Cs | 0.663794  | 0.324494  | -1.191269 |
| N  | 0.998184  | -1.689144 | -0.630859 |
| S  | 2.231824  | -2.322746 | 0.372184  |
| C  | 1.643808  | -2.003828 | 2.320705  |
| F  | 0.283274  | -2.277628 | 2.455527  |
| F  | 1.853650  | -0.676526 | 2.690406  |
| F  | 2.342212  | -2.816440 | 3.200088  |
| O  | 2.331080  | -3.954108 | 0.325119  |
| O  | 3.613995  | -1.466785 | 0.306766  |
| C  | 3.355921  | 1.678255  | 0.309827  |
| C  | 3.771052  | 0.768436  | -1.917209 |
| C  | 4.873823  | 1.583102  | 0.062397  |
| H  | 3.025724  | 1.045858  | 1.135761  |
| H  | 3.010435  | 2.707894  | 0.449610  |
| C  | 5.001472  | 1.573461  | -1.482944 |
| H  | 3.403181  | 1.013189  | -2.917143 |

|   |           |           |           |
|---|-----------|-----------|-----------|
| H | 3.927655  | -0.309062 | -1.814384 |
| H | 5.262068  | 0.647327  | 0.476475  |
| H | 5.410916  | 2.420604  | 0.518310  |
| H | 4.959015  | 2.592816  | -1.885193 |
| H | 5.931755  | 1.104655  | -1.819095 |
| O | 2.714173  | 1.176560  | -0.945709 |
| C | -0.124563 | 2.368552  | -1.382814 |
| C | -0.686058 | 3.249386  | -0.545732 |
| C | 0.358128  | 1.968079  | -2.612307 |
| H | -0.298836 | 1.577868  | -3.386644 |
| H | 1.361461  | 2.250865  | -2.927387 |
| C | -1.138398 | 4.578125  | -1.165983 |
| H | -2.233565 | 4.657508  | -1.160896 |
| H | -0.738422 | 5.426025  | -0.596056 |
| H | -0.801668 | 4.661248  | -2.202641 |
| C | -0.897441 | 3.067051  | 0.919257  |
| C | -0.090717 | 2.190543  | 1.686616  |
| C | -1.887368 | 3.821371  | 1.597312  |
| C | -0.270290 | 2.062751  | 3.073545  |
| H | 0.688722  | 1.618241  | 1.197271  |
| C | -2.074227 | 3.690361  | 2.985616  |
| H | -2.522109 | 4.509031  | 1.046984  |
| C | -1.265902 | 2.811770  | 3.732892  |
| H | 0.366911  | 1.386364  | 3.636791  |
| H | -2.845503 | 4.274574  | 3.481252  |
| H | -1.405007 | 2.715659  | 4.806567  |

---



**Product 3f** (having Z-configuration)

Electronic + Thermal Free Energies: -1487.952045

Correction to Gibb's free energy: 0.314873

Zero-point correction: 0.374271

Imaginary vibration frequency: 0

| Symbol | Coordinates (Å) |           |           |
|--------|-----------------|-----------|-----------|
|        | X               | Y         | Z         |
| Fe     | 2.826668        | -0.465017 | 0.003584  |
| S      | -0.683898       | 2.063371  | 0.447755  |
| F      | -3.267072       | 2.382216  | -0.597049 |
| N      | -0.512370       | 1.323578  | -1.223650 |
| O      | -1.165415       | 1.076739  | 1.647810  |
| C      | -0.292071       | -1.190017 | -0.826235 |
| O      | 0.499178        | 3.148988  | 0.703814  |
| F      | -1.948013       | 4.196353  | -0.829446 |
| F      | -2.831042       | 3.691283  | 1.181603  |
| C      | -1.141128       | -0.034659 | -1.360371 |
| H      | -1.288207       | -0.118035 | -2.447090 |
| H      | -2.128495       | -0.009578 | -0.898235 |
| C      | 1.135836        | -1.048645 | -1.184616 |
| C      | -0.851746       | -2.216473 | -0.115415 |
| C      | 1.679137        | 0.216819  | -1.648164 |
| C      | 2.207558        | -2.024190 | -1.285675 |
| H      | 2.145121        | -3.071666 | -1.038383 |
| C      | 0.856557        | 1.465119  | -1.810397 |
| H      | 1.339065        | 2.352943  | -1.390199 |
| H      | 0.676090        | 1.669399  | -2.875641 |
| C      | -2.335972       | -2.354440 | 0.055331  |
| C      | 3.370372        | -1.369740 | -1.825103 |

|   |           |           |           |
|---|-----------|-----------|-----------|
| H | 4.324601  | -1.838355 | -2.020550 |
| C | 3.047557  | 0.019279  | -2.042429 |
| H | 3.709986  | 0.776977  | -2.437353 |
| C | 4.431463  | -0.745285 | 1.361586  |
| H | 5.324603  | -1.316770 | 1.149466  |
| C | -2.907814 | -2.471403 | 1.346900  |
| H | -2.269592 | -2.416107 | 2.225620  |
| C | -4.295368 | -2.628829 | 1.511645  |
| H | -4.714431 | -2.700714 | 2.512280  |
| C | -4.587141 | -2.591984 | -0.904493 |
| H | -5.228527 | -2.649816 | -1.780502 |
| C | 4.244064  | 0.663384  | 1.105659  |
| H | 4.973749  | 1.331613  | 0.669234  |
| C | 2.268561  | -0.169737 | 2.031420  |
| H | 1.255266  | -0.231376 | 2.403491  |
| C | -2.310492 | 3.169803  | 0.015913  |
| C | -3.198620 | -2.422431 | -1.066402 |
| H | -2.778660 | -2.369054 | -2.068215 |
| C | 2.908351  | 1.019843  | 1.519594  |
| H | 2.454396  | 1.997529  | 1.443533  |
| C | -5.142625 | -2.692448 | 0.385805  |
| H | -6.214462 | -2.821647 | 0.513394  |
| C | 3.209818  | -1.260046 | 1.933886  |
| H | 3.032959  | -2.283864 | 2.233024  |
| C | -0.025156 | -3.315667 | 0.534608  |
| H | 0.133765  | -4.155769 | -0.158113 |
| H | 0.954669  | -2.954925 | 0.859413  |
| H | -0.548116 | -3.723350 | 1.405862  |

---

**Product 3f** (having *E*-configuration)

Electronic + Thermal Free Energies: -1487.949645

Correction to Gibb's free energy: 0.312754

Zero-point correction: 0.374236

Imaginary vibration frequency: 0

| Symbol | Coordinates (Å) |           |           |
|--------|-----------------|-----------|-----------|
|        | X               | Y         | Z         |
| Fe     | -1.100818       | 1.918225  | 0.226015  |
| S      | 3.171273        | -0.218879 | -0.782756 |
| F      | 4.267591        | -1.597059 | 1.428323  |
| N      | 1.762250        | -0.324889 | 0.230040  |
| O      | 2.988244        | -1.223731 | -2.043267 |
| C      | -0.513295       | -1.311820 | 0.316890  |
| O      | 3.542659        | 1.347281  | -0.991413 |
| F      | 5.633815        | 0.017900  | 0.644304  |
| F      | 5.438023        | -1.930419 | -0.470679 |
| C      | 0.998893        | -1.596293 | 0.290910  |
| H      | 1.296476        | -2.150368 | 1.194790  |
| H      | 1.270700        | -2.188410 | -0.583069 |
| C      | -0.869240       | -0.059037 | 1.025422  |
| C      | -1.385610       | -2.232168 | -0.188082 |
| C      | 0.148112        | 0.845221  | 1.535601  |
| C      | -2.879426       | -2.059134 | -0.170740 |
| C      | -2.150901       | 0.508460  | 1.408278  |
| H      | -3.121913       | 0.100405  | 1.184954  |
| C      | 1.624077        | 0.618987  | 1.364140  |
| H      | 2.147212        | 1.550750  | 1.132526  |
| H      | 2.065453        | 0.182983  | 2.274530  |
| C      | -1.912191       | 1.707412  | 2.168355  |

|   |           |           |           |
|---|-----------|-----------|-----------|
| H | -2.673639 | 2.343869  | 2.596663  |
| C | -0.488187 | 1.921335  | 2.244646  |
| H | 0.014385  | 2.739949  | 2.740369  |
| C | -3.535110 | -1.374033 | -1.218857 |
| H | -2.947128 | -0.925937 | -2.016259 |
| C | -1.998717 | 3.594415  | -0.713892 |
| H | -2.755729 | 4.222759  | -0.265103 |
| C | -3.660829 | -2.653176 | 0.846883  |
| H | -3.169787 | -3.190804 | 1.655139  |
| C | -4.939410 | -1.266851 | -1.239210 |
| H | -5.428567 | -0.734057 | -2.051206 |
| C | -0.570371 | 3.788231  | -0.621345 |
| H | -0.071648 | 4.587229  | -0.089960 |
| C | -5.709499 | -1.847246 | -0.211118 |
| H | -6.793348 | -1.763177 | -0.224674 |
| C | -0.956264 | 1.867613  | -1.891069 |
| H | -0.794829 | 0.972432  | -2.475796 |
| C | 4.769608  | -0.992269 | 0.283069  |
| C | 0.074749  | 2.719766  | -1.347342 |
| H | 1.141403  | 2.574688  | -1.453992 |
| C | -5.064760 | -2.542921 | 0.832080  |
| H | -5.650990 | -2.997140 | 1.627319  |
| C | -2.237016 | 2.406480  | -1.499552 |
| H | -3.204237 | 1.989169  | -1.742585 |
| C | -0.976056 | -3.555539 | -0.821152 |
| H | -1.329873 | -3.603210 | -1.860974 |
| H | 0.099075  | -3.748892 | -0.818759 |
| H | -1.461282 | -4.386591 | -0.290079 |

---

## Crystallographic Details

The structures of ferrocene fused tetrahydropyridine (*Sp*)-**3a** (CCDC: 2347472), (*Rp*)-**3a** (CCDC: 2347473), and **3f** (CCDC: 2402043) were confirmed by X-ray structure analysis. We isolated the suitable single crystal by slow evaporation method in the 1:3 ratio solvents of Hexane in Dichloromethane

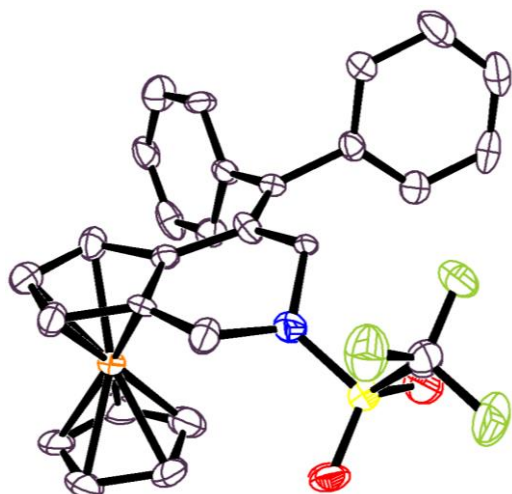

**Table S7.** Crystal data and structure refinement for (*Sp*)-**3a**.

|                                    |                                                                    |
|------------------------------------|--------------------------------------------------------------------|
| Identification code                | ( <i>Sp</i> )- <b>3a</b>                                           |
| CCDC Number                        | <b>2347572</b>                                                     |
| Empirical formula                  | C <sub>27</sub> H <sub>22</sub> F <sub>3</sub> FeNO <sub>2</sub> S |
| Formula weight                     | 537.36                                                             |
| Temperature/K                      | 140(2)                                                             |
| Crystal system                     | orthorhombic                                                       |
| Space group                        | P2 <sub>1</sub> 2 <sub>1</sub> 2 <sub>1</sub>                      |
| a/Å                                | 9.5134(15)                                                         |
| b/Å                                | 9.8740(15)                                                         |
| c/Å                                | 24.656(4)                                                          |
| α/°                                | 90                                                                 |
| β/°                                | 90                                                                 |
| γ/°                                | 90                                                                 |
| Volume/Å <sup>3</sup>              | 2316.1(7)                                                          |
| Z                                  | 4                                                                  |
| ρ <sub>calc</sub> /cm <sup>3</sup> | 1.541                                                              |

|                                                |                                                               |
|------------------------------------------------|---------------------------------------------------------------|
| $\mu/\text{mm}^{-1}$                           | 6.509                                                         |
| F(000)                                         | 1104.0                                                        |
| Crystal size/ $\text{mm}^3$                    | $0.122 \times 0.021 \times 0.015$                             |
| Radiation                                      | CuK $\alpha$ ( $\lambda = 1.54178$ )                          |
| 2 $\Theta$ range for data collection/ $^\circ$ | 9.648 to 127.37                                               |
| Index ranges                                   | $-11 \leq h \leq 11, -11 \leq k \leq 11, -28 \leq l \leq 28$  |
| Reflections collected                          | 41812                                                         |
| Independent reflections                        | 3728 [ $R_{\text{int}} = 0.1272, R_{\text{sigma}} = 0.0602$ ] |
| Data/restraints/parameters                     | 3728/20/321                                                   |
| Goodness-of-fit on $F^2$                       | 1.115                                                         |
| Final R indexes [ $I \geq 2\sigma(I)$ ]        | $R_1 = 0.0940, wR_2 = 0.2625$                                 |
| Final R indexes [all data]                     | $R_1 = 0.1008, wR_2 = 0.2680$                                 |
| Largest diff. peak/hole / $e \text{ \AA}^{-3}$ | 1.73/-1.00                                                    |
| Flack parameter                                | 0.12(2)                                                       |

**Table S8.** Fractional Atomic Coordinates ( $\times 10^4$ ) and Equivalent Isotropic Displacement Parameters ( $\text{\AA}^2 \times 10^3$ ) for (*Sp*)-**3a**.  $U_{\text{eq}}$  is defined as 1/3 of of the trace of the orthogonalized  $U_{\text{ij}}$  tensor.

| Atom | <i>X</i>  | <i>y</i>   | <i>z</i>   | $U(\text{eq})$ |
|------|-----------|------------|------------|----------------|
| Fe1  | 7428(2)   | 5161.7(18) | 6168.1(8)  | 22.5(6)        |
| S1   | 2875(3)   | 4310(3)    | 5484.0(14) | 27.0(8)        |
| F1   | 1234(9)   | 5880(9)    | 4925(4)    | 37(2)          |
| F2   | 823(10)   | 3734(11)   | 4817(5)    | 52(3)          |
| F3   | 2633(9)   | 4686(10)   | 4443(3)    | 45(2)          |
| O1   | 1939(11)  | 4552(10)   | 5924(4)    | 37(2)          |
| O2A  | 3450(20)  | 3009(16)   | 5361(19)   | 30(5)          |
| O2B  | 3530(100) | 3080(80)   | 5560(70)   | 30(5)          |
| N1   | 4057(11)  | 5430(11)   | 5474(5)    | 27(2)          |
| C1   | 6537(13)  | 5882(12)   | 5485(6)    | 22(3)          |
| C2   | 8026(14)  | 5697(14)   | 5400(6)    | 26(3)          |
| C3   | 8712(16)  | 6540(15)   | 5788(6)    | 29(3)          |

**Table S8.** Fractional Atomic Coordinates ( $\times 10^4$ ) and Equivalent Isotropic Displacement Parameters ( $\text{\AA}^2 \times 10^3$ ) for (*Sp*)-**3a**.  $U_{\text{eq}}$  is defined as 1/3 of the trace of the orthogonalized  $U_{ij}$  tensor.

| <b>Atom</b> | <b><i>X</i></b> | <b><i>y</i></b> | <b><i>z</i></b> | <b><i>U</i>(eq)</b> |
|-------------|-----------------|-----------------|-----------------|---------------------|
| C4          | 7703(13)        | 7209(13)        | 6107(5)         | 25(3)               |
| C5          | 6318(14)        | 6838(13)        | 5906(5)         | 20(3)               |
| C6          | 6365(18)        | 4247(16)        | 6772(7)         | 39(4)               |
| C7          | 6504(16)        | 3319(16)        | 6326(7)         | 39(3)               |
| C8          | 7980(16)        | 3148(15)        | 6235(7)         | 37(2)               |
| C9          | 8709(17)        | 3942(15)        | 6634(7)         | 36(2)               |
| C10         | 7718(18)        | 4574(15)        | 6959(6)         | 40(3)               |
| C11         | 5360(13)        | 5251(15)        | 5154(6)         | 28(3)               |
| C12         | 3795(13)        | 6819(12)        | 5644(6)         | 20(3)               |
| C13         | 4899(14)        | 7322(14)        | 6042(5)         | 24(3)               |
| C14         | 4560(13)        | 8224(13)        | 6419(6)         | 22(3)               |
| C15         | 3099(13)        | 8854(13)        | 6445(5)         | 22(3)               |
| C16         | 2027(15)        | 8220(15)        | 6744(6)         | 29(3)               |
| C17         | 671(15)         | 8815(18)        | 6770(6)         | 36(4)               |
| C18         | 446(14)         | 10039(18)       | 6526(6)         | 35(3)               |
| C19         | 1482(16)        | 10710(17)       | 6229(7)         | 41(4)               |
| C20         | 2831(14)        | 10092(14)       | 6191(6)         | 30(3)               |
| C21         | 5557(13)        | 8735(13)        | 6844(5)         | 21(3)               |
| C22         | 6005(15)        | 7818(15)        | 7250(5)         | 26(3)               |
| C23         | 6964(15)        | 8276(17)        | 7652(6)         | 34(4)               |
| C24         | 7424(15)        | 9600(14)        | 7642(6)         | 31(3)               |
| C25         | 6973(16)        | 10507(16)       | 7253(6)         | 34(3)               |
| C26         | 6011(13)        | 10042(13)       | 6859(5)         | 24(3)               |
| C27         | 1809(14)        | 4684(15)        | 4879(6)         | 30(3)               |

**Table S9.** Anisotropic Displacement Parameters ( $\text{\AA}^2 \times 10^3$ ) for (*Sp*)-**3a**. The Anisotropic displacement factor exponent takes the form:  $-2\pi^2[h^2a^2U_{11}+2hka*b*U_{12}+\dots]$ .

| Atom | $U_{11}$ | $U_{22}$ | $U_{33}$ | $U_{23}$ | $U_{13}$ | $U_{12}$ |
|------|----------|----------|----------|----------|----------|----------|
| Fe1  | 19.1(10) | 16.4(9)  | 32.1(10) | 2.5(8)   | 0.9(8)   | 0.7(8)   |
| S1   | 22.2(16) | 20.8(15) | 38.0(18) | 0.4(13)  | 0.1(13)  | -1.2(12) |
| F1   | 31(4)    | 27(4)    | 55(5)    | -1(4)    | -7(4)    | 10(4)    |
| F2   | 28(5)    | 54(6)    | 73(7)    | -10(5)   | -7(5)    | -13(4)   |
| F3   | 37(4)    | 59(6)    | 40(5)    | -10(4)   | 4(4)     | -3(5)    |
| O1   | 38(5)    | 37(5)    | 37(5)    | 4(4)     | 7(3)     | 2(4)     |
| O2A  | 35(6)    | 14(3)    | 41(13)   | -2(5)    | -7(9)    | -5(3)    |
| O2B  | 35(6)    | 14(3)    | 41(13)   | -2(5)    | -7(9)    | -5(3)    |
| N1   | 24(6)    | 20(6)    | 38(6)    | -5(5)    | -2(5)    | 1(5)     |
| C1   | 20(6)    | 11(6)    | 35(7)    | 3(5)     | 1(5)     | 5(5)     |
| C2   | 21(6)    | 26(6)    | 31(3)    | -3(4)    | 4(4)     | -4(5)    |
| C3   | 29(7)    | 25(8)    | 34(8)    | 0(6)     | 5(6)     | -2(6)    |
| C4   | 19(6)    | 31(7)    | 26(6)    | 4(5)     | -2(6)    | -2(5)    |
| C5   | 20(6)    | 13(6)    | 26(7)    | -2(5)    | -2(5)    | -1(5)    |
| C6   | 44(9)    | 27(8)    | 44(9)    | 3(7)     | 6(7)     | 9(7)     |
| C7   | 32(5)    | 23(5)    | 62(8)    | 15(5)    | -1(6)    | -6(4)    |
| C8   | 34(5)    | 20(3)    | 58(6)    | 5(3)     | -8(6)    | 10(5)    |
| C9   | 33(5)    | 18(7)    | 56(6)    | 12(4)    | -7(4)    | 2(4)     |
| C10  | 49(8)    | 31(7)    | 38(3)    | 14(4)    | -4(4)    | 8(6)     |
| C11  | 22(6)    | 28(7)    | 33(7)    | -1(6)    | 3(5)     | -4(6)    |
| C12  | 13(6)    | 8(6)     | 40(8)    | -2(5)    | -3(5)    | 0(5)     |
| C13  | 21(6)    | 26(7)    | 25(7)    | 2(5)     | -1(5)    | 8(5)     |
| C14  | 20(6)    | 13(6)    | 34(7)    | 2(5)     | 2(5)     | 2(5)     |
| C15  | 18(6)    | 21(6)    | 28(7)    | -6(5)    | -4(5)    | 2(5)     |
| C16  | 26(7)    | 30(7)    | 32(7)    | 1(6)     | 3(6)     | 0(6)     |
| C17  | 17(7)    | 53(10)   | 39(8)    | -3(7)    | 2(6)     | -9(7)    |
| C18  | 19(6)    | 47(9)    | 41(8)    | -11(7)   | -1(6)    | 3(7)     |
| C19  | 35(8)    | 35(8)    | 52(10)   | -3(7)    | -20(7)   | 12(7)    |



**Table S9.** Anisotropic Displacement Parameters ( $\text{\AA}^2 \times 10^3$ ) for (*Sp*)-**3a**. The Anisotropic displacement factor exponent takes the form:  $-2\pi^2[h^2a^*U_{11}+2hka^*b^*U_{12}+\dots]$ .

| Atom | $U_{11}$ | $U_{22}$ | $U_{33}$ | $U_{23}$ | $U_{13}$ | $U_{12}$ |
|------|----------|----------|----------|----------|----------|----------|
| C20  | 23(6)    | 26(7)    | 41(7)    | 9(6)     | -2(6)    | 3(6)     |
| C21  | 20(6)    | 17(6)    | 28(7)    | -2(5)    | -3(5)    | 4(5)     |
| C22  | 29(7)    | 25(7)    | 25(7)    | -3(5)    | -2(6)    | -1(6)    |
| C23  | 26(7)    | 54(10)   | 22(7)    | 0(6)     | -5(6)    | 16(7)    |
| C24  | 20(6)    | 35(8)    | 39(7)    | -3(6)    | -10(6)   | 4(6)     |
| C25  | 33(7)    | 36(8)    | 35(8)    | -9(6)    | -6(6)    | -7(7)    |
| C26  | 28(6)    | 13(6)    | 32(7)    | 3(6)     | -7(5)    | -2(5)    |
| C27  | 26(6)    | 26(7)    | 38(8)    | -9(6)    | -2(6)    | -3(6)    |

**Table S10.** Bond Lengths for (*Sp*)-**3a**.

| Atom | Atom | Length/ $\text{\AA}$ | Atom | Atom | Length/ $\text{\AA}$ |
|------|------|----------------------|------|------|----------------------|
| Fe1  | C1   | 2.014(14)            | C3   | C4   | 1.41(2)              |
| Fe1  | C2   | 2.048(14)            | C4   | C5   | 1.455(18)            |
| Fe1  | C3   | 2.056(15)            | C5   | C13  | 1.470(18)            |
| Fe1  | C4   | 2.044(13)            | C6   | C7   | 1.44(2)              |
| Fe1  | C5   | 2.067(13)            | C6   | C10  | 1.41(2)              |
| Fe1  | C6   | 2.014(17)            | C7   | C8   | 1.43(2)              |
| Fe1  | C7   | 2.058(16)            | C8   | C9   | 1.44(2)              |
| Fe1  | C8   | 2.063(14)            | C9   | C10  | 1.39(2)              |
| Fe1  | C9   | 2.062(15)            | C12  | C13  | 1.521(18)            |
| Fe1  | C10  | 2.054(14)            | C13  | C14  | 1.328(19)            |
| S1   | O1   | 1.424(11)            | C14  | C15  | 1.524(17)            |
| S1   | O2A  | 1.430(18)            | C14  | C21  | 1.500(19)            |
| S1   | O2B  | 1.38(7)              | C15  | C16  | 1.41(2)              |
| S1   | N1   | 1.577(11)            | C15  | C20  | 1.397(19)            |
| S1   | C27  | 1.842(15)            | C16  | C17  | 1.42(2)              |
| F1   | C27  | 1.307(17)            | C17  | C18  | 1.37(2)              |
| F2   | C27  | 1.335(17)            | C18  | C19  | 1.39(2)              |

**Table S10.** Bond Lengths for (*Sp*)-**3a**.

| Atom Atom Length/Å |     |           | Atom Atom Length/Å |     |           |
|--------------------|-----|-----------|--------------------|-----|-----------|
| F3                 | C27 | 1.331(17) | C19                | C20 | 1.424(19) |
| N1                 | C11 | 1.481(17) | C21                | C22 | 1.416(19) |
| N1                 | C12 | 1.455(16) | C21                | C26 | 1.361(18) |
| C1                 | C2  | 1.444(18) | C22                | C23 | 1.42(2)   |
| C1                 | C5  | 1.418(19) | C23                | C24 | 1.38(2)   |
| C1                 | C11 | 1.520(18) | C24                | C25 | 1.38(2)   |
| C2                 | C3  | 1.43(2)   | C25                | C26 | 1.412(19) |

**Table S11.** Bond Angles for (*Sp*)-**3a**.

| Atom Atom Atom Angle/° |     |     |          | Atom Atom Atom Angle/° |    |     |           |
|------------------------|-----|-----|----------|------------------------|----|-----|-----------|
| C1                     | Fe1 | C2  | 41.6(5)  | C11                    | C1 | Fe1 | 128.0(9)  |
| C1                     | Fe1 | C3  | 68.6(6)  | C1                     | C2 | Fe1 | 67.9(8)   |
| C1                     | Fe1 | C4  | 69.1(5)  | C3                     | C2 | Fe1 | 69.9(8)   |
| C1                     | Fe1 | C5  | 40.6(5)  | C3                     | C2 | C1  | 106.1(13) |
| C1                     | Fe1 | C7  | 106.9(6) | C2                     | C3 | Fe1 | 69.4(8)   |
| C1                     | Fe1 | C8  | 120.9(6) | C4                     | C3 | Fe1 | 69.5(8)   |
| C1                     | Fe1 | C9  | 156.9(6) | C4                     | C3 | C2  | 109.7(13) |
| C1                     | Fe1 | C10 | 161.8(6) | C3                     | C4 | Fe1 | 70.4(8)   |
| C2                     | Fe1 | C3  | 40.7(6)  | C3                     | C4 | C5  | 108.0(12) |
| C2                     | Fe1 | C5  | 69.3(5)  | C5                     | C4 | Fe1 | 70.1(7)   |
| C2                     | Fe1 | C7  | 121.5(6) | C1                     | C5 | Fe1 | 67.7(7)   |
| C2                     | Fe1 | C8  | 104.6(6) | C1                     | C5 | C4  | 106.4(11) |
| C2                     | Fe1 | C9  | 120.1(6) | C1                     | C5 | C13 | 121.2(12) |
| C2                     | Fe1 | C10 | 156.1(6) | C4                     | C5 | Fe1 | 68.4(7)   |
| C3                     | Fe1 | C5  | 68.3(5)  | C4                     | C5 | C13 | 132.2(12) |
| C3                     | Fe1 | C7  | 157.8(7) | C13                    | C5 | Fe1 | 131.1(10) |
| C3                     | Fe1 | C8  | 121.5(6) | C7                     | C6 | Fe1 | 70.9(9)   |
| C3                     | Fe1 | C9  | 106.8(6) | C10                    | C6 | Fe1 | 71.3(10)  |
| C4                     | Fe1 | C2  | 69.0(5)  | C10                    | C6 | C7  | 108.3(15) |

**Table S11.** Bond Angles for (*Sp*)-**3a**.

| <b>Atom</b> | <b>Atom</b> | <b>Atom</b> | <b>Angle/°</b> | <b>Atom</b> | <b>Atom</b> | <b>Atom</b> | <b>Angle/°</b> |
|-------------|-------------|-------------|----------------|-------------|-------------|-------------|----------------|
| C4          | Fe1         | C3          | 40.1(6)        | C6          | C7          | Fe1         | 67.7(10)       |
| C4          | Fe1         | C5          | 41.5(5)        | C8          | C7          | Fe1         | 69.9(9)        |
| C4          | Fe1         | C7          | 160.6(6)       | C8          | C7          | C6          | 106.6(15)      |
| C4          | Fe1         | C8          | 157.9(6)       | C7          | C8          | Fe1         | 69.5(9)        |
| C4          | Fe1         | C9          | 122.9(6)       | C7          | C8          | C9          | 107.5(15)      |
| C4          | Fe1         | C10         | 109.4(6)       | C9          | C8          | Fe1         | 69.6(8)        |
| C6          | Fe1         | C1          | 124.4(6)       | C8          | C9          | Fe1         | 69.7(8)        |
| C6          | Fe1         | C2          | 160.0(6)       | C10         | C9          | Fe1         | 70.0(9)        |
| C6          | Fe1         | C3          | 158.9(7)       | C10         | C9          | C8          | 108.3(14)      |
| C6          | Fe1         | C4          | 124.2(6)       | C6          | C10         | Fe1         | 68.3(9)        |
| C6          | Fe1         | C5          | 109.5(6)       | C9          | C10         | Fe1         | 70.6(9)        |
| C6          | Fe1         | C7          | 41.3(7)        | C9          | C10         | C6          | 109.2(15)      |
| C6          | Fe1         | C8          | 68.7(7)        | N1          | C11         | C1          | 106.3(11)      |
| C6          | Fe1         | C9          | 67.9(6)        | N1          | C12         | C13         | 112.0(11)      |
| C6          | Fe1         | C10         | 40.4(7)        | C5          | C13         | C12         | 112.4(11)      |
| C7          | Fe1         | C5          | 123.3(6)       | C14         | C13         | C5          | 126.9(13)      |
| C7          | Fe1         | C8          | 40.7(6)        | C14         | C13         | C12         | 120.3(11)      |
| C7          | Fe1         | C9          | 68.3(6)        | C13         | C14         | C15         | 121.7(12)      |
| C8          | Fe1         | C5          | 157.9(6)       | C13         | C14         | C21         | 124.1(12)      |
| C9          | Fe1         | C5          | 160.7(6)       | C21         | C14         | C15         | 114.2(11)      |
| C9          | Fe1         | C8          | 40.7(6)        | C16         | C15         | C14         | 120.1(12)      |
| C10         | Fe1         | C3          | 122.7(7)       | C20         | C15         | C14         | 120.3(12)      |
| C10         | Fe1         | C5          | 126.3(6)       | C20         | C15         | C16         | 119.6(12)      |
| C10         | Fe1         | C7          | 68.2(7)        | C15         | C16         | C17         | 119.9(13)      |
| C10         | Fe1         | C8          | 67.5(7)        | C18         | C17         | C16         | 119.3(14)      |
| C10         | Fe1         | C9          | 39.4(7)        | C17         | C18         | C19         | 122.6(14)      |
| O1          | S1          | O2A         | 123.5(14)      | C18         | C19         | C20         | 118.0(14)      |
| O1          | S1          | N1          | 109.9(6)       | C15         | C20         | C19         | 120.6(13)      |
| O1          | S1          | C27         | 103.8(6)       | C22         | C21         | C14         | 117.9(12)      |

**Table S11.** Bond Angles for (*Sp*)-**3a**.

| <b>Atom</b> | <b>Atom</b> | <b>Atom</b> | <b>Angle/°</b> | <b>Atom</b> | <b>Atom</b> | <b>Atom</b> | <b>Angle/°</b> |
|-------------|-------------|-------------|----------------|-------------|-------------|-------------|----------------|
| O2A         | S1          | N1          | 110.6(9)       | C26         | C21         | C14         | 122.7(12)      |
| O2A         | S1          | C27         | 103(2)         | C26         | C21         | C22         | 119.4(12)      |
| O2B         | S1          | O1          | 109(7)         | C21         | C22         | C23         | 118.9(13)      |
| O2B         | S1          | N1          | 108(4)         | C24         | C23         | C22         | 119.5(13)      |
| O2B         | S1          | C27         | 122(6)         | C23         | C24         | C25         | 122.0(13)      |
| N1          | S1          | C27         | 103.9(6)       | C24         | C25         | C26         | 117.9(14)      |
| C11         | N1          | S1          | 121.4(9)       | C21         | C26         | C25         | 122.3(13)      |
| C12         | N1          | S1          | 122.3(9)       | F1          | C27         | S1          | 109.9(10)      |
| C12         | N1          | C11         | 114.1(11)      | F1          | C27         | F2          | 110.6(11)      |
| C2          | C1          | Fe1         | 70.4(8)        | F1          | C27         | F3          | 108.4(12)      |
| C2          | C1          | C11         | 126.3(12)      | F2          | C27         | S1          | 109.8(11)      |
| C5          | C1          | Fe1         | 71.7(8)        | F3          | C27         | S1          | 109.3(9)       |
| C5          | C1          | C2          | 109.6(12)      | F3          | C27         | F2          | 108.8(11)      |
| C5          | C1          | C11         | 123.9(11)      |             |             |             |                |

**Table S12.** Torsion Angles for (*Sp*)-**3a**.

| <b>A</b> | <b>B</b> | <b>C</b> | <b>D</b> | <b>Angle/°</b> | <b>A</b> | <b>B</b> | <b>C</b> | <b>D</b> | <b>Angle/°</b> |
|----------|----------|----------|----------|----------------|----------|----------|----------|----------|----------------|
| Fe1      | C1       | C2       | C3       | -59.9(10)      | C4       | C5       | C13      | C14      | -3(2)          |
| Fe1      | C1       | C5       | C4       | 57.6(9)        | C5       | C1       | C2       | Fe1      | 61.3(10)       |
| Fe1      | C1       | C5       | C13      | -125.6(12)     | C5       | C1       | C2       | C3       | 1.4(17)        |
| Fe1      | C1       | C11      | N1       | 72.7(14)       | C5       | C1       | C11      | N1       | -19.8(18)      |
| Fe1      | C2       | C3       | C4       | -57.8(10)      | C5       | C13      | C14      | C15      | 167.3(13)      |
| Fe1      | C3       | C4       | C5       | -60.3(9)       | C5       | C13      | C14      | C21      | -11(2)         |
| Fe1      | C4       | C5       | C1       | -57.1(9)       | C6       | C7       | C8       | Fe1      | -58.0(11)      |
| Fe1      | C4       | C5       | C13      | 126.6(15)      | C6       | C7       | C8       | C9       | 1.5(19)        |
| Fe1      | C5       | C13      | C12      | -93.5(14)      | C7       | C6       | C10      | Fe1      | 61.7(11)       |
| Fe1      | C5       | C13      | C14      | 94.5(17)       | C7       | C6       | C10      | C9       | 2.8(17)        |
| Fe1      | C6       | C7       | C8       | 59.3(11)       | C7       | C8       | C9       | Fe1      | -59.3(11)      |
| Fe1      | C6       | C10      | C9       | -58.9(10)      | C7       | C8       | C9       | C10      | 0.2(18)        |

**Table S12.** Torsion Angles for (*Sp*)-**3a**.

| <b>A</b> | <b>B</b> | <b>C</b> | <b>D</b> | <b>Angle/°</b> | <b>A</b>   | <b>B</b> | <b>C</b> | <b>D</b> | <b>Angle/°</b> |            |
|----------|----------|----------|----------|----------------|------------|----------|----------|----------|----------------|------------|
| Fe1      | C7       | C8       | C9       | 59.4(11)       | C8         | C9       | C10      | Fe1      | -59.3(11)      |            |
| Fe1      | C8       | C9       | C10      | 59.5(10)       | C8         | C9       | C10      | C6       | -1.9(17)       |            |
| Fe1      | C9       | C10      | C6       | 57.5(10)       | C10        | C6       | C7       | Fe1      | -61.9(11)      |            |
| S1       | N1       | C11      | C1       | -143.4(10)     | C10        | C6       | C7       | C8       | -2.6(19)       |            |
| S1       | N1       | C12      | C13      | 130.7(11)      | C11        | N1       | C12      | C13      | -65.8(15)      |            |
| O1       | S1       | N1       | C11      | 164.5(10)      | C11        | C1       | C2       | Fe1      | -123.3(14)     |            |
| O1       | S1       | N1       | C12      | -33.2(13)      | C11        | C1       | C2       | C3       | 176.8(12)      |            |
| O1       | S1       | C27      | F1       | 52.0(11)       | C11        | C1       | C5       | Fe1      | 123.9(13)      |            |
| O1       | S1       | C27      | F2       | -69.8(11)      | C11        | C1       | C5       | C4       | -178.5(12)     |            |
| O1       | S1       | C27      | F3       | 170.9(9)       | C11        | C1       | C5       | C13      | -2(2)          |            |
| O2       | A        | S1       | N1       | C11            | 25(2)      | C12      | N1       | C11      | C1             | 52.8(15)   |
| O2       | A        | S1       | N1       | C12            | -173(2)    | C12      | C13      | C14      | C15            | -4(2)      |
| O2       | A        | S1       | C27      | F1             | -178.3(12) | C12      | C13      | C14      | C21            | 177.3(12)  |
| O2       | A        | S1       | C27      | F2             | 59.9(13)   | C13      | C14      | C15      | C16            | 88.5(17)   |
| O2       | A        | S1       | C27      | F3             | -59.4(13)  | C13      | C14      | C15      | C20            | -94.0(16)  |
| O2       | B        | S1       | N1       | C11            | 46(7)      | C13      | C14      | C21      | C22            | -68.4(18)  |
| O2       | B        | S1       | N1       | C12            | -152(7)    | C13      | C14      | C21      | C26            | 113.3(16)  |
| O2       | B        | S1       | C27      | F1             | 176(6)     | C14      | C15      | C16      | C17            | 179.6(13)  |
| O2       | B        | S1       | C27      | F2             | 54(6)      | C14      | C15      | C20      | C19            | -177.8(13) |
| O2       | B        | S1       | C27      | F3             | -65(6)     | C14      | C21      | C22      | C23            | 179.2(12)  |
| N1       | S1       | C27      | F1       | -62.9(10)      | C14        | C21      | C26      | C25      | -178.6(13)     |            |
| N1       | S1       | C27      | F2       | 175.2(9)       | C15        | C14      | C21      | C22      | 112.9(13)      |            |
| N1       | S1       | C27      | F3       | 56.0(11)       | C15        | C14      | C21      | C26      | -65.4(17)      |            |
| N1       | C12      | C13      | C5       | 38.5(15)       | C15        | C16      | C17      | C18      | -3(2)          |            |
| N1       | C12      | C13      | C14      | -149.0(13)     | C16        | C15      | C20      | C19      | 0(2)           |            |
| C1       | C2       | C3       | Fe1      | 58.6(10)       | C16        | C17      | C18      | C19      | 3(2)           |            |
| C1       | C2       | C3       | C4       | 0.8(16)        | C17        | C18      | C19      | C20      | -1(2)          |            |
| C1       | C5       | C13      | C12      | -7.0(18)       | C18        | C19      | C20      | C15      | 0(2)           |            |
| C1       | C5       | C13      | C14      | -179.0(14)     | C20        | C15      | C16      | C17      | 2(2)           |            |

**Table S12.** Torsion Angles for (*Sp*)-**3a**.

| A  | B  | C   | D   | Angle/°    | A   | B   | C   | D   | Angle/°   |
|----|----|-----|-----|------------|-----|-----|-----|-----|-----------|
| C2 | C1 | C5  | Fe1 | -60.5(10)  | C21 | C14 | C15 | C16 | -92.8(15) |
| C2 | C1 | C5  | C4  | -2.9(16)   | C21 | C14 | C15 | C20 | 84.7(16)  |
| C2 | C1 | C5  | C13 | 173.9(12)  | C21 | C22 | C23 | C24 | 1(2)      |
| C2 | C1 | C11 | N1  | 165.4(13)  | C22 | C21 | C26 | C25 | 3(2)      |
| C2 | C3 | C4  | Fe1 | 57.7(10)   | C22 | C23 | C24 | C25 | 0(2)      |
| C2 | C3 | C4  | C5  | -2.6(15)   | C23 | C24 | C25 | C26 | 0(2)      |
| C3 | C4 | C5  | Fe1 | 60.5(9)    | C24 | C25 | C26 | C21 | -2(2)     |
| C3 | C4 | C5  | C1  | 3.4(14)    | C26 | C21 | C22 | C23 | -2(2)     |
| C3 | C4 | C5  | C13 | -173.0(15) | C27 | S1  | N1  | C11 | -85.0(11) |
| C4 | C5 | C13 | C12 | 168.9(13)  | C27 | S1  | N1  | C12 | 77.4(12)  |

**Table S13.** Hydrogen Atom Coordinates ( $\text{\AA} \times 10^4$ ) and Isotropic Displacement Parameters ( $\text{\AA}^2 \times 10^3$ ) for (*Sp*)-**3a**.

| Atom | x       | Y        | z       | U(eq) |
|------|---------|----------|---------|-------|
| H2   | 8460.99 | 5128.54  | 5137.72 | 31    |
| H3   | 9701.34 | 6636.04  | 5824.95 | 35    |
| H4   | 7893.08 | 7798.9   | 6402.43 | 30    |
| H6   | 5506.08 | 4580.93  | 6915.99 | 46    |
| H7   | 5761.96 | 2901.29  | 6130.07 | 47    |
| H8   | 8400.49 | 2607.91  | 5960.37 | 45    |
| H9   | 9700.01 | 4020.99  | 6668.16 | 43    |
| H10  | 7922.39 | 5139.04  | 7261.35 | 47    |
| H11A | 5274.99 | 5709.31  | 4797.92 | 33    |
| H11B | 5547.3  | 4277.3   | 5090.64 | 33    |
| H12A | 2856.47 | 6874.24  | 5815.37 | 24    |
| H12B | 3790.83 | 7414.13  | 5320.55 | 24    |
| H16  | 2254.14 | 7393.07  | 6928.06 | 35    |
| H17  | -71.24  | 8368.82  | 6955.38 | 44    |
| H18  | -453.34 | 10449.72 | 6559.29 | 43    |

**Table S13.** Hydrogen Atom Coordinates ( $\text{\AA}\times 10^4$ ) and Isotropic Displacement Parameters ( $\text{\AA}^2\times 10^3$ ) for (*Sp*)-**3a**.

| <b>Atom</b> | <b><i>x</i></b> | <b><i>Y</i></b> | <b><i>z</i></b> | <b>U(eq)</b> |
|-------------|-----------------|-----------------|-----------------|--------------|
| H19         | 1294.16         | 11552.38        | 6057.72         | 49           |
| H20         | 3555.93         | 10525.26        | 5990            | 36           |
| H22         | 5669.42         | 6911.76         | 7253.67         | 31           |
| H23         | 7286.51         | 7673.77         | 7925.75         | 41           |
| H24         | 8069.6          | 9896.77         | 7910.98         | 38           |
| H25         | 7300.14         | 11416.56        | 7251.19         | 41           |
| H26         | 5669.5          | 10661.83        | 6595.89         | 29           |

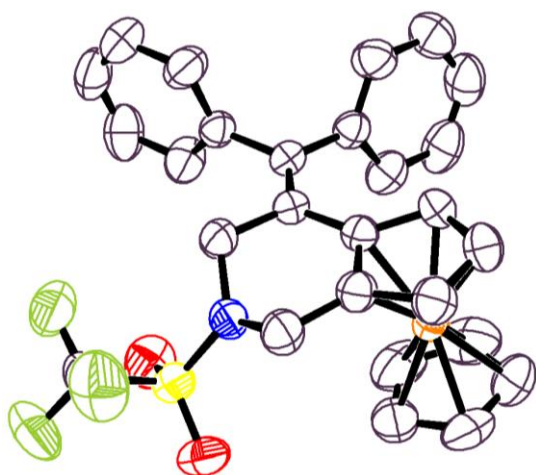

**Table S14.** Crystal data and structure refinement for (*Rp*)-**3a**.

|                                    |                                                                    |
|------------------------------------|--------------------------------------------------------------------|
| Identification code                | ( <i>Rp</i> )- <b>3a</b>                                           |
| CCDC Number                        | 2347573                                                            |
| Empirical formula                  | C <sub>27</sub> H <sub>22</sub> F <sub>3</sub> FeNO <sub>2</sub> S |
| Formula weight                     | 537.37                                                             |
| Temperature/K                      | 303.0                                                              |
| Crystal system                     | orthorhombic                                                       |
| Space group                        | P2 <sub>1</sub> 2 <sub>1</sub> 2 <sub>1</sub>                      |
| a/Å                                | 9.5665(14)                                                         |
| b/Å                                | 9.8290(17)                                                         |
| c/Å                                | 25.415(4)                                                          |
| α/°                                | 90.00                                                              |
| β/°                                | 90.00                                                              |
| γ/°                                | 90.00                                                              |
| Volume/Å <sup>3</sup>              | 2389.7(7)                                                          |
| Z                                  | 4                                                                  |
| ρ <sub>calc</sub> /cm <sup>3</sup> | 1.494                                                              |
| μ/mm <sup>-1</sup>                 | 0.768                                                              |
| F(000)                             | 1104.0                                                             |
| Crystal size/mm <sup>3</sup>       | 0.02 × 0.012 × 0.01                                                |



|                                                  |                                                               |
|--------------------------------------------------|---------------------------------------------------------------|
| Radiation                                        | MoK $\alpha$ ( $\lambda = 0.71073$ )                          |
| 2 $\Theta$ range for data collection/ $^{\circ}$ | 4.44 to 59.16                                                 |
| Index ranges                                     | $-13 \leq h \leq 13, -13 \leq k \leq 13, -35 \leq l \leq 35$  |
| Reflections collected                            | 61813                                                         |
| Independent reflections                          | 6676 [ $R_{\text{int}} = 0.0621, R_{\text{sigma}} = 0.0350$ ] |
| Data/restraints/parameters                       | 6676/0/316                                                    |
| Goodness-of-fit on $F^2$                         | 1.050                                                         |
| Final R indexes [ $I \geq 2\sigma(I)$ ]          | $R_1 = 0.0389, wR_2 = 0.0897$                                 |
| Final R indexes [all data]                       | $R_1 = 0.0508, wR_2 = 0.0964$                                 |
| Largest diff. peak/hole / $e \text{ \AA}^{-3}$   | 0.25/-0.19                                                    |
| Flack parameter                                  | 0.005(15)                                                     |

**Table S15.** Fractional Atomic Coordinates ( $\times 10^4$ ) and Equivalent Isotropic Displacement Parameters ( $\text{\AA}^2 \times 10^3$ ) for (*Rp*)-**3a**.  $U_{\text{eq}}$  is defined as 1/3 of the trace of the orthogonalised  $U_{\text{ij}}$  tensor.

| Atom | <i>x</i>   | <i>y</i>   | <i>z</i>    | U(eq)     |
|------|------------|------------|-------------|-----------|
| Fe1  | 2496.4(3)  | 5171.7(3)  | 6166.82(13) | 47.87(9)  |
| S1   | 6982.8(6)  | 4351.0(6)  | 5500.9(3)   | 55.59(15) |
| F1   | 8651.6(17) | 5875.2(19) | 4951.2(8)   | 81.2(5)   |
| N1   | 5813.4(17) | 5489.1(19) | 5479.3(8)   | 50.1(4)   |
| O2   | 7908(2)    | 4595(2)    | 5924.8(8)   | 76.9(5)   |
| C11  | 5004(2)    | 7365(2)    | 6045.7(8)   | 40.7(4)   |
| O1   | 6373(2)    | 3057.1(18) | 5403.7(11)  | 87.1(7)   |
| F2   | 7271(2)    | 4666(2)    | 4488.2(7)   | 99.2(6)   |
| F3   | 9044(2)    | 3749(2)    | 4869.8(11)  | 113.7(8)  |
| C12  | 6094(2)    | 6893(2)    | 5652.9(9)   | 49.2(5)   |
| C1   | 3593(2)    | 6860(2)    | 5925.2(9)   | 42.7(5)   |
| C15  | 5362(2)    | 8237(2)    | 6426.0(9)   | 42.9(4)   |

**Table S15.** Fractional Atomic Coordinates ( $\times 10^4$ ) and Equivalent Isotropic Displacement Parameters ( $\text{\AA}^2 \times 10^3$ ) for (*Rp*)-**3a**.  $U_{\text{eq}}$  is defined as 1/3 of the trace of the orthogonalised  $U_{\text{H}}$  tensor.

| Atom | <i>x</i> | <i>y</i> | <i>z</i>   | $U(\text{eq})$ |
|------|----------|----------|------------|----------------|
| C5   | 3363(2)  | 5917(2)  | 5498.4(10) | 47.3(5)        |
| C22  | 4388(2)  | 8699(2)  | 6846.4(9)  | 45.8(5)        |
| C2   | 2235(2)  | 7226(2)  | 6117.8(10) | 48.4(5)        |
| C13  | 4512(2)  | 5320(3)  | 5177.1(10) | 54.0(5)        |
| C16  | 6803(2)  | 8846(2)  | 6451.5(9)  | 44.3(4)        |
| C3   | 1217(2)  | 6557(3)  | 5817.2(11) | 58.1(6)        |
| C4   | 1897(2)  | 5740(3)  | 5432.9(11) | 56.7(6)        |
| C23  | 4016(3)  | 7823(3)  | 7246.9(10) | 61.9(6)        |
| C8   | 1255(4)  | 3938(4)  | 6615.9(16) | 87.4(11)       |
| C27  | 3851(3)  | 10008(3) | 6847.1(10) | 62.2(6)        |
| C17  | 7832(3)  | 8283(3)  | 6753.5(11) | 65.1(7)        |
| C18  | 9154(3)  | 8882(4)  | 6779.5(12) | 76.7(9)        |
| C24  | 3106(3)  | 8265(4)  | 7641.8(11) | 76.0(8)        |
| C20  | 8422(3)  | 10614(3) | 6203.9(15) | 78.4(8)        |
| C9   | 1939(4)  | 3181(3)  | 6238.0(17) | 83.8(9)        |
| C25  | 2567(3)  | 9556(4)  | 7630.3(12) | 78.2(8)        |
| C6   | 3583(4)  | 4195(4)  | 6737.8(16) | 89.1(11)       |
| C14  | 8051(3)  | 4676(3)  | 4915.9(12) | 67.2(7)        |
| C21  | 7107(3)  | 10031(3) | 6176.6(12) | 64.7(6)        |
| C10  | 3393(3)  | 3333(3)  | 6306.3(17) | 84.4(11)       |
| C19  | 9435(3)  | 10045(3) | 6510.3(13) | 76.3(9)        |
| C26  | 2939(3)  | 10428(3) | 7238.5(12) | 75.6(8)        |
| C7   | 2266(5)  | 4581(3)  | 6927.0(13) | 91.9(11)       |

**Table S16.** Anisotropic Displacement Parameters ( $\text{\AA}^2 \times 10^3$ ) for (*Rp*)-**3a**. The Anisotropic displacement factor exponent takes the form:  $-2\pi^2[h^2a^*U_{11}+2hka^*b^*U_{12}+\dots]$ .

| Atom | U <sub>11</sub> | U <sub>22</sub> | U <sub>33</sub> | U <sub>23</sub> | U <sub>13</sub> | U <sub>12</sub> |
|------|-----------------|-----------------|-----------------|-----------------|-----------------|-----------------|
| Fe1  | 39.40(13)       | 44.41(15)       | 59.79(18)       | 2.37(13)        | -0.20(15)       | -5.85(13)       |
| S1   | 48.5(3)         | 45.1(3)         | 73.1(4)         | -0.5(3)         | -0.3(3)         | -2.7(2)         |
| F1   | 70.6(9)         | 84.7(12)        | 88.2(12)        | -0.3(10)        | 17.1(9)         | -19.2(9)        |
| N1   | 39.9(8)         | 49.2(10)        | 61.1(11)        | -14.7(9)        | 1.3(8)          | -2.4(7)         |
| O2   | 67.9(10)        | 85.8(13)        | 77.1(12)        | 10.7(11)        | -16.0(10)       | 3.7(10)         |
| C11  | 41.7(9)         | 35.0(9)         | 45.4(12)        | 0.6(8)          | 3.5(8)          | -1.2(8)         |
| O1   | 72.6(12)        | 41.4(10)        | 147(2)          | -4.5(12)        | 3.5(14)         | -6.0(9)         |
| F2   | 93.9(12)        | 137.0(16)       | 66.6(10)        | -29.0(11)       | 2.6(9)          | -5.1(13)        |
| F3   | 75.9(11)        | 104.4(16)       | 161(2)          | -34.6(15)       | 28.3(13)        | 28.6(11)        |
| C12  | 46.5(11)        | 47.1(12)        | 54.1(13)        | -8.2(10)        | 7.6(9)          | -6.8(9)         |
| C1   | 40.2(10)        | 37.4(10)        | 50.5(12)        | 2.0(9)          | -1.6(9)         | 0.8(8)          |
| C15  | 43.1(10)        | 38.3(10)        | 47.2(11)        | 2.1(9)          | 3.1(9)          | -3.0(8)         |
| C5   | 44.0(10)        | 47.0(12)        | 50.8(12)        | -1.0(10)        | -4.1(9)         | -0.8(8)         |
| C22  | 47.9(11)        | 46.6(12)        | 42.8(11)        | -5.8(9)         | 1.1(9)          | -6.4(9)         |
| C2   | 41.2(11)        | 46.2(10)        | 57.8(13)        | 0.8(10)         | 2.9(9)          | 6.4(8)          |
| C13  | 46.7(10)        | 59.0(14)        | 56.2(13)        | -10.7(11)       | -4.0(9)         | -3.0(10)        |
| C16  | 45.4(10)        | 42.9(10)        | 44.6(11)        | -6.8(9)         | 3.9(9)          | -6.5(9)         |
| C3   | 39.2(10)        | 65.7(16)        | 69.3(16)        | 1.1(13)         | -5.8(11)        | 5.5(10)         |
| C4   | 46.7(11)        | 61.3(14)        | 62.1(15)        | -4.1(12)        | -13.0(11)       | 0.2(11)         |
| C23  | 64.6(14)        | 64.2(16)        | 56.8(14)        | 6.9(12)         | 3.6(12)         | -10.1(12)       |
| C8   | 73.1(18)        | 76(2)           | 113(3)          | 18(2)           | 33(2)           | -17.6(17)       |
| C27  | 74.8(15)        | 51.7(15)        | 60.2(14)        | -6.0(12)        | 11.8(12)        | -1.6(12)        |
| C17  | 56.0(14)        | 73.3(17)        | 65.9(15)        | 13.3(13)        | -1.6(11)        | -5.7(12)        |
| C18  | 48.9(13)        | 113(3)          | 68.6(17)        | -0.1(18)        | -5.1(13)        | -2.9(15)        |
| C24  | 74.3(17)        | 101(2)          | 52.5(15)        | 2.5(16)         | 12.0(14)        | -24.0(18)       |
| C20  | 69.0(16)        | 63.1(16)        | 103(2)          | 5.5(18)         | 16.2(17)        | -20.3(13)       |

**Table S16.** Anisotropic Displacement Parameters ( $\text{\AA}^2 \times 10^3$ ) for (*Rp*)-**3a**. The Anisotropic displacement factor exponent takes the form:  $-2\pi^2[h^2a^{*2}U_{11}+2hka^*b^*U_{12}+\dots]$ .

| Atom | U <sub>11</sub> | U <sub>22</sub> | U <sub>33</sub> | U <sub>23</sub> | U <sub>13</sub> | U <sub>12</sub> |
|------|-----------------|-----------------|-----------------|-----------------|-----------------|-----------------|
| C9   | 92(2)           | 49.5(14)        | 110(3)          | 0.7(17)         | 11(2)           | -24.5(15)       |
| C25  | 65.1(15)        | 98(2)           | 71.3(17)        | -30.2(16)       | 16.4(15)        | -9.7(19)        |
| C6   | 89(2)           | 71(2)           | 108(3)          | 40(2)           | -29(2)          | -12.5(17)       |
| C14  | 51.3(12)        | 75.8(18)        | 74.3(17)        | -22.6(15)       | 5.7(13)         | 4.1(13)         |
| C21  | 57.8(12)        | 55.6(14)        | 80.8(17)        | 11.5(14)        | -1.4(12)        | -11.4(10)       |
| C10  | 76.3(19)        | 51.6(15)        | 125(3)          | 30.5(19)        | 24(2)           | 7.6(14)         |
| C19  | 53.0(13)        | 90(2)           | 85.4(19)        | -19.6(18)       | 13.7(13)        | -24.7(15)       |
| C26  | 79.2(17)        | 70.4(18)        | 77.3(19)        | -19.9(15)       | 15.6(15)        | 7.9(15)         |
| C7   | 140(3)          | 68.3(19)        | 67.8(18)        | 17.0(14)        | 18(2)           | -3(2)           |

**Table S17.** Bond Lengths for (*Rp*)-**3a**.

| Atom | Atom | Length/ $\text{\AA}$ | Atom | Atom | Length/ $\text{\AA}$ |
|------|------|----------------------|------|------|----------------------|
| Fe1  | C1   | 2.057(2)             | C15  | C22  | 1.489(3)             |
| Fe1  | C5   | 2.027(2)             | C15  | C16  | 1.504(3)             |
| Fe1  | C2   | 2.039(2)             | C5   | C13  | 1.490(3)             |
| Fe1  | C3   | 2.035(3)             | C5   | C4   | 1.423(3)             |
| Fe1  | C4   | 2.030(3)             | C22  | C23  | 1.380(3)             |
| Fe1  | C8   | 2.045(3)             | C22  | C27  | 1.385(3)             |
| Fe1  | C9   | 2.036(3)             | C2   | C3   | 1.402(3)             |
| Fe1  | C6   | 2.027(3)             | C16  | C17  | 1.366(3)             |
| Fe1  | C10  | 2.032(3)             | C16  | C21  | 1.389(3)             |
| Fe1  | C7   | 2.029(3)             | C3   | C4   | 1.422(4)             |
| S1   | N1   | 1.5830(19)           | C23  | C24  | 1.397(4)             |
| S1   | O2   | 1.415(2)             | C8   | C9   | 1.380(5)             |
| S1   | O1   | 1.4211(19)           | C8   | C7   | 1.400(5)             |
| S1   | C14  | 1.832(3)             | C27  | C26  | 1.386(4)             |

**Table S17.** Bond Lengths for (*Rp*)-**3a**.

| Atom | Atom | Length/Å | Atom | Atom | Length/Å |
|------|------|----------|------|------|----------|
| F1   | C14  | 1.314(3) | C17  | C18  | 1.396(4) |
| N1   | C12  | 1.473(3) | C18  | C19  | 1.360(5) |
| N1   | C13  | 1.473(3) | C24  | C25  | 1.371(5) |
| C11  | C12  | 1.516(3) | C20  | C21  | 1.384(4) |
| C11  | C1   | 1.471(3) | C20  | C19  | 1.363(5) |
| C11  | C15  | 1.336(3) | C9   | C10  | 1.409(5) |
| F2   | C14  | 1.318(3) | C25  | C26  | 1.361(5) |
| F3   | C14  | 1.321(3) | C6   | C10  | 1.398(5) |
| C1   | C5   | 1.444(3) | C6   | C7   | 1.401(5) |
| C1   | C2   | 1.434(3) |      |      |          |

**Table S18.** Bond Angles for (*Rp*)-**3a**.

| Atom | Atom | Atom | Angle/°    | Atom | Atom | Atom | Angle/°    |
|------|------|------|------------|------|------|------|------------|
| C5   | Fe1  | C1   | 41.40(9)   | C5   | C1   | C11  | 120.91(19) |
| C5   | Fe1  | C2   | 68.96(9)   | C2   | C1   | Fe1  | 68.81(12)  |
| C5   | Fe1  | C3   | 68.79(10)  | C2   | C1   | C11  | 132.5(2)   |
| C5   | Fe1  | C4   | 41.06(9)   | C2   | C1   | C5   | 106.20(18) |
| C5   | Fe1  | C8   | 156.81(14) | C11  | C15  | C22  | 123.70(19) |
| C5   | Fe1  | C9   | 121.92(14) | C11  | C15  | C16  | 121.41(19) |
| C5   | Fe1  | C10  | 107.17(12) | C22  | C15  | C16  | 114.89(18) |
| C5   | Fe1  | C7   | 161.02(14) | C1   | C5   | Fe1  | 70.42(13)  |
| C2   | Fe1  | C1   | 41.00(8)   | C1   | C5   | C13  | 123.49(18) |
| C2   | Fe1  | C8   | 123.38(12) | C13  | C5   | Fe1  | 128.22(17) |
| C3   | Fe1  | C1   | 68.70(9)   | C4   | C5   | Fe1  | 69.57(16)  |
| C3   | Fe1  | C2   | 40.25(10)  | C4   | C5   | C1   | 108.5(2)   |
| C3   | Fe1  | C8   | 106.93(13) | C4   | C5   | C13  | 127.9(2)   |

**Table S18.** Bond Angles for (*Rp*)-**3a**.

| Atom Atom Atom Angle/° |     |     |            | Atom Atom Atom Angle/° |     |     |            |
|------------------------|-----|-----|------------|------------------------|-----|-----|------------|
| C3                     | Fe1 | C9  | 121.63(13) | C23                    | C22 | C15 | 120.0(2)   |
| C4                     | Fe1 | C1  | 69.39(9)   | C23                    | C22 | C27 | 118.9(2)   |
| C4                     | Fe1 | C2  | 68.70(10)  | C27                    | C22 | C15 | 121.1(2)   |
| C4                     | Fe1 | C3  | 40.96(10)  | C1                     | C2  | Fe1 | 70.19(12)  |
| C4                     | Fe1 | C8  | 120.78(14) | C3                     | C2  | Fe1 | 69.75(14)  |
| C4                     | Fe1 | C9  | 105.78(14) | C3                     | C2  | C1  | 109.0(2)   |
| C4                     | Fe1 | C10 | 121.62(15) | N1                     | C13 | C5  | 107.07(18) |
| C8                     | Fe1 | C1  | 160.22(13) | C17                    | C16 | C15 | 121.6(2)   |
| C9                     | Fe1 | C1  | 159.28(13) | C17                    | C16 | C21 | 118.1(2)   |
| C9                     | Fe1 | C2  | 157.71(12) | C21                    | C16 | C15 | 120.3(2)   |
| C9                     | Fe1 | C8  | 39.52(14)  | C2                     | C3  | Fe1 | 70.00(13)  |
| C6                     | Fe1 | C1  | 109.52(12) | C2                     | C3  | C4  | 108.8(2)   |
| C6                     | Fe1 | C5  | 124.16(13) | C4                     | C3  | Fe1 | 69.31(15)  |
| C6                     | Fe1 | C2  | 125.15(14) | C5                     | C4  | Fe1 | 69.37(15)  |
| C6                     | Fe1 | C3  | 159.70(16) | C3                     | C4  | Fe1 | 69.73(15)  |
| C6                     | Fe1 | C4  | 158.94(16) | C3                     | C4  | C5  | 107.5(2)   |
| C6                     | Fe1 | C8  | 67.51(15)  | C22                    | C23 | C24 | 119.7(3)   |
| C6                     | Fe1 | C9  | 67.39(15)  | C9                     | C8  | Fe1 | 69.88(17)  |
| C6                     | Fe1 | C10 | 40.30(16)  | C9                     | C8  | C7  | 108.0(3)   |
| C6                     | Fe1 | C7  | 40.41(16)  | C7                     | C8  | Fe1 | 69.31(17)  |
| C10                    | Fe1 | C1  | 123.67(11) | C22                    | C27 | C26 | 120.7(3)   |
| C10                    | Fe1 | C2  | 160.67(12) | C16                    | C17 | C18 | 120.6(3)   |
| C10                    | Fe1 | C3  | 157.71(15) | C19                    | C18 | C17 | 120.6(3)   |
| C10                    | Fe1 | C8  | 67.68(14)  | C25                    | C24 | C23 | 120.5(3)   |
| C10                    | Fe1 | C9  | 40.54(14)  | C19                    | C20 | C21 | 120.3(3)   |
| C7                     | Fe1 | C1  | 124.78(13) | C8                     | C9  | Fe1 | 70.59(18)  |

**Table S18.** Bond Angles for (*Rp*)-**3a**.

| Atom | Atom | Atom | Angle/°    | Atom | Atom | Atom | Angle/°    |
|------|------|------|------------|------|------|------|------------|
| C7   | Fe1  | C2   | 109.16(12) | C8   | C9   | C10  | 109.0(4)   |
| C7   | Fe1  | C3   | 122.79(14) | C10  | C9   | Fe1  | 69.57(17)  |
| C7   | Fe1  | C4   | 157.34(15) | C26  | C25  | C24  | 120.0(3)   |
| C7   | Fe1  | C8   | 40.18(15)  | C10  | C6   | Fe1  | 70.04(19)  |
| C7   | Fe1  | C9   | 67.17(16)  | C10  | C6   | C7   | 108.4(3)   |
| C7   | Fe1  | C10  | 67.99(15)  | C7   | C6   | Fe1  | 69.89(19)  |
| N1   | S1   | C14  | 104.07(12) | F1   | C14  | S1   | 110.15(19) |
| O2   | S1   | N1   | 110.43(12) | F1   | C14  | F2   | 108.0(3)   |
| O2   | S1   | O1   | 122.75(15) | F1   | C14  | F3   | 108.1(2)   |
| O2   | S1   | C14  | 103.84(12) | F2   | C14  | S1   | 110.61(18) |
| O1   | S1   | N1   | 109.64(12) | F2   | C14  | F3   | 109.2(2)   |
| O1   | S1   | C14  | 104.12(15) | F3   | C14  | S1   | 110.7(2)   |
| C12  | N1   | S1   | 121.51(15) | C20  | C21  | C16  | 120.8(3)   |
| C13  | N1   | S1   | 122.40(16) | C9   | C10  | Fe1  | 69.89(19)  |
| C13  | N1   | C12  | 114.59(19) | C6   | C10  | Fe1  | 69.66(19)  |
| C1   | C11  | C12  | 112.99(18) | C6   | C10  | C9   | 106.8(4)   |
| C15  | C11  | C12  | 119.77(18) | C18  | C19  | C20  | 119.5(2)   |
| C15  | C11  | C1   | 127.03(19) | C25  | C26  | C27  | 120.1(3)   |
| N1   | C12  | C11  | 111.01(17) | C8   | C7   | Fe1  | 70.5(2)    |
| C11  | C1   | Fe1  | 132.73(15) | C8   | C7   | C6   | 107.8(3)   |
| C5   | C1   | Fe1  | 68.19(13)  | C6   | C7   | Fe1  | 69.70(19)  |

**Table S19.** Torsion Angles for (*Rp*)-**3a**.

| A   | B  | C  | D   | Angle/°   | A  | B   | C  | D   | Angle/°  |
|-----|----|----|-----|-----------|----|-----|----|-----|----------|
| Fe1 | C1 | C5 | C13 | -123.5(2) | C3 | Fe1 | C9 | C10 | 162.1(2) |
| Fe1 | C1 | C5 | C4  | 59.36(19) | C3 | Fe1 | C6 | C10 | 159.3(3) |

**Table S19.** Torsion Angles for (*Rp*)-**3a**.

| <b>A</b> | <b>B</b> | <b>C</b> | <b>D</b> | <b>Angle/°</b> | <b>A</b> | <b>B</b> | <b>C</b> | <b>D</b> | <b>Angle/°</b> |
|----------|----------|----------|----------|----------------|----------|----------|----------|----------|----------------|
| Fe1      | C1       | C2       | C3       | -59.12(17)     | C3       | Fe1      | C6       | C7       | 39.9(5)        |
| Fe1      | C5       | C13      | N1       | -72.0(3)       | C3       | Fe1      | C10      | C9       | -43.5(5)       |
| Fe1      | C5       | C4       | C3       | 59.53(19)      | C3       | Fe1      | C10      | C6       | -161.2(3)      |
| Fe1      | C2       | C3       | C4       | -58.62(19)     | C3       | Fe1      | C7       | C8       | 76.9(2)        |
| Fe1      | C3       | C4       | C5       | -59.30(19)     | C3       | Fe1      | C7       | C6       | -164.6(2)      |
| Fe1      | C8       | C9       | C10      | 59.2(2)        | C4       | Fe1      | C1       | C11      | -150.2(2)      |
| Fe1      | C8       | C7       | C6       | -60.0(2)       | C4       | Fe1      | C1       | C5       | -37.67(13)     |
| Fe1      | C9       | C10      | C6       | 60.2(2)        | C4       | Fe1      | C1       | C2       | 80.86(15)      |
| Fe1      | C6       | C10      | C9       | -60.3(2)       | C4       | Fe1      | C5       | C1       | 119.5(2)       |
| Fe1      | C6       | C7       | C8       | 60.5(2)        | C4       | Fe1      | C5       | C13      | -122.8(3)      |
| S1       | N1       | C12      | C11      | -128.19(18)    | C4       | Fe1      | C2       | C1       | -82.69(14)     |
| S1       | N1       | C13      | C5       | 140.58(18)     | C4       | Fe1      | C2       | C3       | 37.45(15)      |
| N1       | S1       | C14      | F1       | 63.5(2)        | C4       | Fe1      | C3       | C2       | -120.2(2)      |
| N1       | S1       | C14      | F2       | -55.9(2)       | C4       | Fe1      | C8       | C9       | 77.0(2)        |
| N1       | S1       | C14      | F3       | -177.07(19)    | C4       | Fe1      | C8       | C7       | -163.6(2)      |
| O2       | S1       | N1       | C12      | 31.3(2)        | C4       | Fe1      | C9       | C8       | -119.6(2)      |
| O2       | S1       | N1       | C13      | -163.5(2)      | C4       | Fe1      | C9       | C10      | 120.5(3)       |
| O2       | S1       | C14      | F1       | -52.1(2)       | C4       | Fe1      | C6       | C10      | -36.2(4)       |
| O2       | S1       | C14      | F2       | -171.5(2)      | C4       | Fe1      | C6       | C7       | -155.7(3)      |
| O2       | S1       | C14      | F3       | 67.3(2)        | C4       | Fe1      | C10      | C9       | -76.8(3)       |
| C11      | C1       | C5       | Fe1      | 127.8(2)       | C4       | Fe1      | C10      | C6       | 165.6(2)       |
| C11      | C1       | C5       | C13      | 4.2(4)         | C4       | Fe1      | C7       | C8       | 39.0(4)        |
| C11      | C1       | C5       | C4       | -172.9(2)      | C4       | Fe1      | C7       | C6       | 157.4(3)       |
| C11      | C1       | C2       | Fe1      | -129.2(3)      | C4       | C5       | C13      | N1       | -164.9(3)      |
| C11      | C1       | C2       | C3       | 171.7(3)       | C23      | C22      | C27      | C26      | -0.9(4)        |
| C11      | C15      | C22      | C23      | 73.0(3)        | C23      | C24      | C25      | C26      | -1.3(5)        |



**Table S19.** Torsion Angles for (*Rp*)-**3a**.

| <b>A</b> | <b>B</b> | <b>C</b> | <b>D</b> | <b>Angle/°</b> | <b>A</b> | <b>B</b> | <b>C</b> | <b>D</b> | <b>Angle/°</b> |
|----------|----------|----------|----------|----------------|----------|----------|----------|----------|----------------|
| C11      | C15      | C22      | C27      | -107.5(3)      | C8       | Fe1      | C1       | C11      | 85.0(4)        |
| C11      | C15      | C16      | C17      | -94.6(3)       | C8       | Fe1      | C1       | C5       | -162.4(4)      |
| C11      | C15      | C16      | C21      | 87.2(3)        | C8       | Fe1      | C1       | C2       | -43.9(4)       |
| O1       | S1       | N1       | C12      | 169.5(2)       | C8       | Fe1      | C5       | C1       | 165.0(3)       |
| O1       | S1       | N1       | C13      | -25.2(2)       | C8       | Fe1      | C5       | C13      | -77.3(4)       |
| O1       | S1       | C14      | F1       | 178.34(19)     | C8       | Fe1      | C5       | C4       | 45.5(4)        |
| O1       | S1       | C14      | F2       | 59.0(2)        | C8       | Fe1      | C2       | C1       | 163.67(18)     |
| O1       | S1       | C14      | F3       | -62.2(2)       | C8       | Fe1      | C2       | C3       | -76.2(2)       |
| C12      | N1       | C13      | C5       | -53.2(3)       | C8       | Fe1      | C3       | C2       | 122.05(18)     |
| C12      | C11      | C1       | Fe1      | 93.0(2)        | C8       | Fe1      | C3       | C4       | -117.74(18)    |
| C12      | C11      | C1       | C5       | 5.1(3)         | C8       | Fe1      | C4       | C5       | -160.92(18)    |
| C12      | C11      | C1       | C2       | -166.7(2)      | C8       | Fe1      | C4       | C3       | 80.3(2)        |
| C12      | C11      | C15      | C22      | -176.5(2)      | C8       | Fe1      | C9       | C10      | -119.9(4)      |
| C12      | C11      | C15      | C16      | 4.6(3)         | C8       | Fe1      | C6       | C10      | 81.5(2)        |
| C1       | Fe1      | C5       | C13      | 117.7(2)       | C8       | Fe1      | C6       | C7       | -37.9(2)       |
| C1       | Fe1      | C5       | C4       | -119.5(2)      | C8       | Fe1      | C10      | C9       | 36.6(3)        |
| C1       | Fe1      | C2       | C3       | 120.1(2)       | C8       | Fe1      | C10      | C6       | -81.1(2)       |
| C1       | Fe1      | C3       | C2       | -37.51(13)     | C8       | Fe1      | C7       | C6       | 118.4(3)       |
| C1       | Fe1      | C3       | C4       | 82.70(16)      | C8       | C9       | C10      | Fe1      | -59.8(3)       |
| C1       | Fe1      | C4       | C5       | 37.96(14)      | C8       | C9       | C10      | C6       | 0.4(4)         |
| C1       | Fe1      | C4       | C3       | -80.86(16)     | C27      | C22      | C23      | C24      | 0.3(4)         |
| C1       | Fe1      | C8       | C9       | -166.5(3)      | C17      | C16      | C21      | C20      | 0.7(4)         |
| C1       | Fe1      | C8       | C7       | -47.1(5)       | C17      | C18      | C19      | C20      | -1.4(5)        |
| C1       | Fe1      | C9       | C8       | 167.1(3)       | C24      | C25      | C26      | C27      | 0.7(5)         |
| C1       | Fe1      | C9       | C10      | 47.2(5)        | C9       | Fe1      | C1       | C11      | -70.2(4)       |
| C1       | Fe1      | C6       | C10      | -119.4(2)      | C9       | Fe1      | C1       | C5       | 42.4(4)        |

**Table S19.** Torsion Angles for (*Rp*)-**3a**.

| <b>A</b> | <b>B</b> | <b>C</b> | <b>D</b> | <b>Angle/°</b> | <b>A</b> | <b>B</b> | <b>C</b> | <b>D</b> | <b>Angle/°</b> |
|----------|----------|----------|----------|----------------|----------|----------|----------|----------|----------------|
| C1       | Fe1      | C6       | C7       | 121.1(2)       | C9       | Fe1      | C1       | C2       | 160.9(3)       |
| C1       | Fe1      | C10      | C9       | -161.8(2)      | C9       | Fe1      | C5       | C1       | -163.68(16)    |
| C1       | Fe1      | C10      | C6       | 80.5(2)        | C9       | Fe1      | C5       | C13      | -45.9(2)       |
| C1       | Fe1      | C7       | C8       | 162.42(18)     | C9       | Fe1      | C5       | C4       | 76.9(2)        |
| C1       | Fe1      | C7       | C6       | -79.2(2)       | C9       | Fe1      | C2       | C1       | -162.2(3)      |
| C1       | C11      | C12      | N1       | -37.0(3)       | C9       | Fe1      | C2       | C3       | -42.1(4)       |
| C1       | C11      | C15      | C22      | 9.0(4)         | C9       | Fe1      | C3       | C2       | 162.63(17)     |
| C1       | C11      | C15      | C16      | -169.9(2)      | C9       | Fe1      | C3       | C4       | -77.2(2)       |
| C1       | C5       | C13      | N1       | 18.6(3)        | C9       | Fe1      | C4       | C5       | -120.80(17)    |
| C1       | C5       | C4       | Fe1      | -59.88(18)     | C9       | Fe1      | C4       | C3       | 120.38(17)     |
| C1       | C5       | C4       | C3       | -0.4(3)        | C9       | Fe1      | C8       | C7       | 119.4(3)       |
| C1       | C2       | C3       | Fe1      | 59.39(15)      | C9       | Fe1      | C6       | C10      | 38.6(2)        |
| C1       | C2       | C3       | C4       | 0.8(3)         | C9       | Fe1      | C6       | C7       | -80.8(2)       |
| C15      | C11      | C12      | N1       | 147.8(2)       | C9       | Fe1      | C10      | C6       | -117.7(4)      |
| C15      | C11      | C1       | Fe1      | -92.3(3)       | C9       | Fe1      | C7       | C8       | -37.0(2)       |
| C15      | C11      | C1       | C5       | 179.8(2)       | C9       | Fe1      | C7       | C6       | 81.4(2)        |
| C15      | C11      | C1       | C2       | 8.1(4)         | C9       | C8       | C7       | Fe1      | 59.4(2)        |
| C15      | C22      | C23      | C24      | 179.7(2)       | C9       | C8       | C7       | C6       | -0.6(4)        |
| C15      | C22      | C27      | C26      | 179.7(2)       | C6       | Fe1      | C1       | C11      | 7.4(3)         |
| C15      | C16      | C17      | C18      | -178.7(3)      | C6       | Fe1      | C1       | C5       | 119.92(18)     |
| C15      | C16      | C21      | C20      | 178.9(3)       | C6       | Fe1      | C1       | C2       | -121.55(19)    |
| C5       | Fe1      | C1       | C11      | -112.5(3)      | C6       | Fe1      | C5       | C1       | -80.84(19)     |
| C5       | Fe1      | C1       | C2       | 118.52(18)     | C6       | Fe1      | C5       | C13      | 36.9(3)        |
| C5       | Fe1      | C2       | C1       | -38.50(13)     | C6       | Fe1      | C5       | C4       | 159.7(2)       |
| C5       | Fe1      | C2       | C3       | 81.63(16)      | C6       | Fe1      | C2       | C1       | 79.2(2)        |
| C5       | Fe1      | C3       | C2       | -82.09(15)     | C6       | Fe1      | C2       | C3       | -160.66(19)    |

**Table S19.** Torsion Angles for (*Rp*)-**3a**.

| <b>A</b> | <b>B</b> | <b>C</b> | <b>D</b> | <b>Angle/°</b> | <b>A</b> | <b>B</b> | <b>C</b> | <b>D</b> | <b>Angle/°</b> |
|----------|----------|----------|----------|----------------|----------|----------|----------|----------|----------------|
| C5       | Fe1      | C3       | C4       | 38.12(15)      | C6       | Fe1      | C3       | C2       | 51.3(4)        |
| C5       | Fe1      | C4       | C3       | -118.8(2)      | C6       | Fe1      | C3       | C4       | 171.5(3)       |
| C5       | Fe1      | C8       | C9       | 44.0(4)        | C6       | Fe1      | C4       | C5       | -53.0(4)       |
| C5       | Fe1      | C8       | C7       | 163.3(3)       | C6       | Fe1      | C4       | C3       | -171.8(3)      |
| C5       | Fe1      | C9       | C8       | -161.2(2)      | C6       | Fe1      | C8       | C9       | -81.3(3)       |
| C5       | Fe1      | C9       | C10      | 78.9(3)        | C6       | Fe1      | C8       | C7       | 38.1(2)        |
| C5       | Fe1      | C6       | C10      | -75.6(2)       | C6       | Fe1      | C9       | C8       | 81.6(3)        |
| C5       | Fe1      | C6       | C7       | 164.98(19)     | C6       | Fe1      | C9       | C10      | -38.4(3)       |
| C5       | Fe1      | C10      | C9       | -119.4(3)      | C6       | Fe1      | C10      | C9       | 117.7(4)       |
| C5       | Fe1      | C10      | C6       | 123.0(2)       | C6       | Fe1      | C7       | C8       | -118.4(3)      |
| C5       | Fe1      | C7       | C8       | -159.7(3)      | C14      | S1       | N1       | C12      | -79.6(2)       |
| C5       | Fe1      | C7       | C6       | -41.2(5)       | C14      | S1       | N1       | C13      | 85.6(2)        |
| C5       | C1       | C2       | Fe1      | 58.15(16)      | C21      | C16      | C17      | C18      | -0.5(4)        |
| C5       | C1       | C2       | C3       | -1.0(3)        | C21      | C20      | C19      | C18      | 1.5(5)         |
| C22      | C15      | C16      | C17      | 86.4(3)        | C10      | Fe1      | C1       | C11      | -35.2(3)       |
| C22      | C15      | C16      | C21      | -91.7(3)       | C10      | Fe1      | C1       | C5       | 77.3(2)        |
| C22      | C23      | C24      | C25      | 0.8(4)         | C10      | Fe1      | C1       | C2       | -164.15(19)    |
| C22      | C27      | C26      | C25      | 0.4(4)         | C10      | Fe1      | C5       | C1       | -121.80(16)    |
| C2       | Fe1      | C1       | C11      | 128.9(3)       | C10      | Fe1      | C5       | C13      | -4.1(2)        |
| C2       | Fe1      | C1       | C5       | -118.52(18)    | C10      | Fe1      | C5       | C4       | 118.74(18)     |
| C2       | Fe1      | C5       | C1       | 38.14(12)      | C10      | Fe1      | C2       | C1       | 43.4(4)        |
| C2       | Fe1      | C5       | C13      | 155.9(2)       | C10      | Fe1      | C2       | C3       | 163.5(4)       |
| C2       | Fe1      | C5       | C4       | -81.32(16)     | C10      | Fe1      | C3       | C2       | -165.7(3)      |
| C2       | Fe1      | C3       | C4       | 120.2(2)       | C10      | Fe1      | C3       | C4       | -45.4(4)       |
| C2       | Fe1      | C4       | C5       | 82.00(15)      | C10      | Fe1      | C4       | C5       | -79.68(19)     |
| C2       | Fe1      | C4       | C3       | -36.82(14)     | C10      | Fe1      | C4       | C3       | 161.49(16)     |

**Table S19.** Torsion Angles for (*Rp*)-**3a**.

| <b>A</b> | <b>B</b> | <b>C</b> | <b>D</b> | <b>Angle/°</b> | <b>A</b> | <b>B</b> | <b>C</b> | <b>D</b> | <b>Angle/°</b> |
|----------|----------|----------|----------|----------------|----------|----------|----------|----------|----------------|
| C2       | Fe1      | C8       | C9       | 160.5(2)       | C10      | Fe1      | C8       | C9       | -37.5(3)       |
| C2       | Fe1      | C8       | C7       | -80.2(2)       | C10      | Fe1      | C8       | C7       | 81.8(2)        |
| C2       | Fe1      | C9       | C8       | -47.3(5)       | C10      | Fe1      | C9       | C8       | 119.9(4)       |
| C2       | Fe1      | C9       | C10      | -167.3(3)      | C10      | Fe1      | C6       | C7       | -119.4(3)      |
| C2       | Fe1      | C6       | C10      | -162.57(17)    | C10      | Fe1      | C7       | C8       | -81.0(2)       |
| C2       | Fe1      | C6       | C7       | 78.0(2)        | C10      | Fe1      | C7       | C6       | 37.4(2)        |
| C2       | Fe1      | C10      | C9       | 165.4(3)       | C10      | C6       | C7       | Fe1      | -59.7(2)       |
| C2       | Fe1      | C10      | C6       | 47.7(5)        | C10      | C6       | C7       | C8       | 0.9(4)         |
| C2       | Fe1      | C7       | C8       | 119.4(2)       | C19      | C20      | C21      | C16      | -1.2(5)        |
| C2       | Fe1      | C7       | C6       | -122.1(2)      | C7       | Fe1      | C1       | C11      | 149.9(3)       |
| C2       | C1       | C5       | Fe1      | -58.55(15)     | C7       | Fe1      | C1       | C5       | 162.42(17)     |
| C2       | C1       | C5       | C13      | 177.9(2)       | C7       | Fe1      | C1       | C2       | -79.1(2)       |
| C2       | C1       | C5       | C4       | 0.8(3)         | C7       | Fe1      | C5       | C1       | -49.7(4)       |
| C2       | C3       | C4       | Fe1      | 59.05(18)      | C7       | Fe1      | C5       | C13      | 68.0(4)        |
| C2       | C3       | C4       | C5       | -0.3(3)        | C7       | Fe1      | C5       | C4       | -169.2(3)      |
| C13      | N1       | C12      | C11      | 65.5(3)        | C7       | Fe1      | C2       | C1       | 121.38(18)     |
| C13      | C5       | C4       | Fe1      | 123.1(3)       | C7       | Fe1      | C2       | C3       | -118.5(2)      |
| C13      | C5       | C4       | C3       | -177.3(2)      | C7       | Fe1      | C3       | C2       | 81.0(2)        |
| C16      | C15      | C22      | C23      | -108.0(2)      | C7       | Fe1      | C3       | C4       | -158.81(18)    |
| C16      | C15      | C22      | C27      | 71.4(3)        | C7       | Fe1      | C4       | C5       | 170.9(3)       |
| C16      | C17      | C18      | C19      | 0.9(5)         | C7       | Fe1      | C4       | C3       | 52.1(4)        |
| C3       | Fe1      | C1       | C11      | 165.8(2)       | C7       | Fe1      | C8       | C9       | -119.4(3)      |
| C3       | Fe1      | C1       | C5       | -81.67(14)     | C7       | Fe1      | C9       | C8       | 37.6(2)        |
| C3       | Fe1      | C1       | C2       | 36.85(14)      | C7       | Fe1      | C9       | C10      | -82.3(3)       |
| C3       | Fe1      | C5       | C1       | 81.43(14)      | C7       | Fe1      | C6       | C10      | 119.4(3)       |
| C3       | Fe1      | C5       | C13      | -160.8(2)      | C7       | Fe1      | C10      | C9       | 80.1(3)        |

**Table S19.** Torsion Angles for (*Rp*)-**3a**.

| A  | B   | C  | D  | Angle/°    | A  | B   | C   | D   | Angle/°  |
|----|-----|----|----|------------|----|-----|-----|-----|----------|
| C3 | Fe1 | C5 | C4 | -38.03(16) | C7 | Fe1 | C10 | C6  | -37.5(2) |
| C3 | Fe1 | C2 | C1 | -120.1(2)  | C7 | C8  | C9  | Fe1 | -59.0(2) |
| C3 | Fe1 | C4 | C5 | 118.8(2)   | C7 | C8  | C9  | C10 | 100.2(4) |
| C3 | Fe1 | C8 | C9 | 119.5(2)   | C7 | C6  | C10 | Fe1 | 59.6(2)  |
| C3 | Fe1 | C8 | C7 | -121.1(2)  | C7 | C6  | C10 | C9  | -0.8(4)  |
| C3 | Fe1 | C9 | C8 | -77.9(3)   |    |     |     |     |          |

**Table S20.** Hydrogen Atom Coordinates ( $\text{\AA}\times 10^4$ ) and Isotropic Displacement Parameters ( $\text{\AA}^2\times 10^3$ ) for (*Rp*)-**3a**.

| Atom | x    | y     | z    | U(eq) |
|------|------|-------|------|-------|
| H12A | 6090 | 7494  | 5350 | 59    |
| H12B | 7013 | 6937  | 5813 | 59    |
| H2   | 2059 | 7813  | 6397 | 58    |
| H13A | 4334 | 4363  | 5111 | 65    |
| H13B | 4581 | 5785  | 4842 | 65    |
| H3   | 255  | 6635  | 5862 | 70    |
| H4   | 1462 | 5189  | 5184 | 68    |
| H23  | 4369 | 6941  | 7254 | 74    |
| H8   | 292  | 4009  | 6657 | 105   |
| H27  | 4105 | 10612 | 6582 | 75    |
| H17  | 7651 | 7494  | 6944 | 78    |
| H18  | 9849 | 8480  | 6983 | 92    |
| H24  | 2865 | 7678  | 7914 | 91    |
| H20  | 8616 | 11398 | 6012 | 94    |
| H9   | 1510 | 2656  | 5980 | 101   |
| H25  | 1947 | 9837  | 7890 | 94    |
| H6   | 4439 | 4467  | 6876 | 107   |

**Table S20.** Hydrogen Atom Coordinates ( $\text{\AA}\times 10^4$ ) and Isotropic Displacement Parameters ( $\text{\AA}^2\times 10^3$ ) for (*Rp*)-**3a**.

| Atom | x     | y     | z    | U(eq) |
|------|-------|-------|------|-------|
| H21  | 6419  | 10438 | 5972 | 78    |
| H10  | 4091  | 2936  | 6103 | 101   |
| H19  | 10311 | 10450 | 6535 | 92    |
| H26  | 2581  | 11308 | 7233 | 91    |
| H7   | 2094  | 5161  | 7209 | 110   |

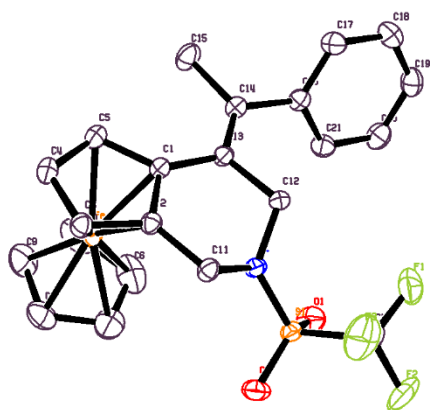

**Table 21.** Crystal data and structure refinement for **3f**.

|                     |                                                                                 |
|---------------------|---------------------------------------------------------------------------------|
| Identification code | <b>3f</b>                                                                       |
| CCDC Number         | 2402043                                                                         |
| Empirical formula   | $\text{C}_{44}\text{H}_{40}\text{F}_6\text{Fe}_2\text{N}_2\text{O}_4\text{S}_2$ |
| Formula weight      | 950.60                                                                          |
| Temperature/K       | 103(2)                                                                          |
| Crystal system      | triclinic                                                                       |
| Space group         | P-1                                                                             |
| a/ $\text{\AA}$     | 9.6500(6)                                                                       |
| b/ $\text{\AA}$     | 10.5668(6)                                                                      |
| c/ $\text{\AA}$     | 11.6109(8)                                                                      |
| $\alpha$ / $^\circ$ | 89.893(2)                                                                       |
| $\beta$ / $^\circ$  | 69.144(2)                                                                       |

|                                                |                                                               |
|------------------------------------------------|---------------------------------------------------------------|
| $\gamma/^\circ$                                | 67.203(2)                                                     |
| Volume/ $\text{\AA}^3$                         | 1007.15(11)                                                   |
| Z                                              | 1                                                             |
| $\rho_{\text{calc}}/\text{cm}^3$               | 1.567                                                         |
| $\mu/\text{mm}^{-1}$                           | 0.899                                                         |
| F(000)                                         | 488.0                                                         |
| Crystal size/ $\text{mm}^3$                    | $0.051 \times 0.035 \times 0.024$                             |
| Radiation                                      | MoK $\alpha$ ( $\lambda = 0.71073$ )                          |
| 2 $\Theta$ range for data collection/ $^\circ$ | 4.962 to 60.078                                               |
| Index ranges                                   | $-13 \leq h \leq 13, -14 \leq k \leq 14, -16 \leq l \leq 16$  |
| Reflections collected                          | 64227                                                         |
| Independent reflections                        | 5806 [ $R_{\text{int}} = 0.0466, R_{\text{sigma}} = 0.0215$ ] |
| Data/restraints/parameters                     | 5806/0/351                                                    |
| Goodness-of-fit on $F^2$                       | 1.028                                                         |
| Final R indexes [ $I \geq 2\sigma(I)$ ]        | $R_1 = 0.0296, wR_2 = 0.0749$                                 |
| Final R indexes [all data]                     | $R_1 = 0.0346, wR_2 = 0.0788$                                 |
| Largest diff. peak/hole / $e \text{\AA}^{-3}$  | 0.84/-0.40                                                    |

**Table 22. Fractional Atomic Coordinates ( $\times 10^4$ ) and Equivalent Isotropic Displacement Parameters ( $\text{\AA}^2 \times 10^3$ ) for 3f.  $U_{\text{eq}}$  is defined as 1/3 of the trace of the orthogonalised  $U_{\text{ij}}$  tensor.**

| Atom | $x$        | $y$        | $z$        | $U(\text{eq})$ |
|------|------------|------------|------------|----------------|
| Fe1  | 8064.7(2)  | 2551.0(2)  | 1753.7(2)  | 17.93(6)       |
| S1   | 4684.9(3)  | 7020.2(3)  | 1924.0(3)  | 16.97(7)       |
| F1   | 5179.8(15) | 9279.9(10) | 1619.0(12) | 43.5(3)        |
| F2   | 2983.7(14) | 9416.7(11) | 1448.0(13) | 50.6(3)        |
| F3   | 5306.9(16) | 8239.6(12) | -32.8(10)  | 46.9(3)        |
| O1   | 4086.1(12) | 7502.2(11) | 3224.7(9)  | 26.7(2)        |
| O2   | 3888.8(12) | 6418.7(11) | 1420.2(11) | 26.9(2)        |

**Table 22. Fractional Atomic Coordinates ( $\times 10^4$ ) and Equivalent Isotropic Displacement Parameters ( $\text{\AA}^2 \times 10^3$ ) for 3f.  $U_{\text{eq}}$  is defined as 1/3 of the trace of the orthogonalised  $U_{\text{ij}}$  tensor.**

| Atom | $x$         | $y$        | $z$        | $U(\text{eq})$ |
|------|-------------|------------|------------|----------------|
| N1   | 6570.0(12)  | 6052.6(10) | 1409.3(10) | 15.15(18)      |
| C1   | 9300.8(14)  | 3800.2(12) | 1364.5(11) | 15.4(2)        |
| C2   | 8592.2(14)  | 3774.1(12) | 468.7(11)  | 15.0(2)        |
| C3   | 9231.1(15)  | 2383.2(13) | -135.9(12) | 17.8(2)        |
| C4   | 10340.7(16) | 1525.3(13) | 381.5(13)  | 20.8(2)        |
| C5   | 10378.7(16) | 2381.6(13) | 1310.4(13) | 20.6(2)        |
| C6   | 6111(2)     | 3497.4(19) | 3398.9(15) | 38.2(4)        |
| C7   | 5589.7(19)  | 3186.6(17) | 2483.7(17) | 33.1(3)        |
| C8   | 6387(2)     | 1724.7(17) | 2083.3(15) | 29.5(3)        |
| C9   | 7397(2)     | 1130.9(17) | 2745.2(16) | 32.5(3)        |
| C10  | 7227(3)     | 2230(2)    | 3566.6(15) | 38.4(4)        |
| C11  | 7390.7(15)  | 5050.2(12) | 244.9(11)  | 16.2(2)        |
| C12  | 7670.2(15)  | 6379.7(12) | 1852.1(12) | 16.5(2)        |
| C13  | 8839.8(14)  | 5104.1(12) | 2151.5(11) | 15.0(2)        |
| C14  | 9473.8(15)  | 5259.9(12) | 2979.5(11) | 16.4(2)        |
| C15  | 10818.7(18) | 4080.9(14) | 3206.0(14) | 24.3(3)        |
| C16  | 8927.7(15)  | 6636.5(12) | 3723.7(11) | 16.4(2)        |
| C17  | 10057.3(16) | 7196.2(14) | 3605.7(13) | 21.3(2)        |
| C18  | 9602.6(18)  | 8455.3(15) | 4316.2(14) | 25.5(3)        |
| C19  | 8010.0(19)  | 9170.4(14) | 5161.6(13) | 25.3(3)        |
| C20  | 6876.7(17)  | 8624.7(15) | 5295.8(13) | 24.3(3)        |
| C21  | 7329.9(16)  | 7361.8(14) | 4585.7(12) | 20.2(2)        |
| C22  | 4523(2)     | 8587.8(15) | 1200.8(16) | 30.6(3)        |



**Table 23. Anisotropic Displacement Parameters ( $\text{\AA}^2 \times 10^3$ ) for 3f. The Anisotropic displacement factor exponent takes the form:  $-2\pi^2[h^2a^{*2}U_{11}+2hka^*b^*U_{12}+\dots]$ .**

| Atom | U <sub>11</sub> | U <sub>22</sub> | U <sub>33</sub> | U <sub>23</sub> | U <sub>13</sub> | U <sub>12</sub> |
|------|-----------------|-----------------|-----------------|-----------------|-----------------|-----------------|
| Fe1  | 21.42(10)       | 16.36(9)        | 17.77(10)       | 4.85(6)         | -7.41(7)        | -9.73(7)        |
| S1   | 12.48(13)       | 15.56(13)       | 20.52(14)       | -0.55(10)       | -6.69(11)       | -3.13(10)       |
| F1   | 58.9(7)         | 23.5(4)         | 67.4(7)         | 17.6(5)         | -39.9(6)        | -22.1(5)        |
| F2   | 42.8(6)         | 25.6(5)         | 78.3(8)         | 5.4(5)          | -40.4(6)        | 6.5(4)          |
| F3   | 64.2(7)         | 40.1(6)         | 36.2(5)         | 20.6(5)         | -26.2(5)        | -15.2(5)        |
| O1   | 20.5(5)         | 28.3(5)         | 21.5(5)         | -4.5(4)         | -2.8(4)         | -5.0(4)         |
| O2   | 16.4(4)         | 26.4(5)         | 37.8(6)         | -4.6(4)         | -12.1(4)        | -7.1(4)         |
| N1   | 12.5(4)         | 14.9(4)         | 16.8(4)         | -0.3(3)         | -6.8(4)         | -3.4(3)         |
| C1   | 14.0(5)         | 14.1(5)         | 17.2(5)         | 2.6(4)          | -6.3(4)         | -4.7(4)         |
| C2   | 14.2(5)         | 14.3(5)         | 14.7(5)         | 2.2(4)          | -4.3(4)         | -5.2(4)         |
| C3   | 17.5(5)         | 16.0(5)         | 17.5(5)         | 0.2(4)          | -5.0(4)         | -6.1(4)         |
| C4   | 21.0(6)         | 13.7(5)         | 25.4(6)         | 1.3(4)          | -9.5(5)         | -4.3(4)         |
| C5   | 19.4(6)         | 15.0(5)         | 26.8(6)         | 3.1(4)          | -11.9(5)        | -3.9(4)         |
| C6   | 43.2(9)         | 36.8(8)         | 25.2(7)         | -0.8(6)         | 6.6(7)          | -25.1(7)        |
| C7   | 22.7(7)         | 31.7(7)         | 39.5(8)         | 11.6(6)         | -2.3(6)         | -14.5(6)        |
| C8   | 32.8(7)         | 32.4(7)         | 32.1(7)         | 11.3(6)         | -11.6(6)        | -23.0(6)        |
| C9   | 43.2(9)         | 30.0(7)         | 32.9(8)         | 17.6(6)         | -15.3(7)        | -23.4(7)        |
| C10  | 55.0(11)        | 54.0(10)        | 21.8(7)         | 16.0(7)         | -14.8(7)        | -38.1(9)        |
| C11  | 16.2(5)         | 15.3(5)         | 14.9(5)         | 0.4(4)          | -6.8(4)         | -3.7(4)         |
| C12  | 15.3(5)         | 14.7(5)         | 22.0(6)         | 2.9(4)          | -10.6(4)        | -5.5(4)         |
| C13  | 13.5(5)         | 13.7(5)         | 16.3(5)         | 2.4(4)          | -5.5(4)         | -4.5(4)         |
| C14  | 15.6(5)         | 16.1(5)         | 16.5(5)         | 2.5(4)          | -6.3(4)         | -5.2(4)         |
| C15  | 26.9(7)         | 20.2(6)         | 25.1(6)         | 2.6(5)          | -16.5(6)        | -3.2(5)         |
| C16  | 17.6(5)         | 17.5(5)         | 14.3(5)         | 2.7(4)          | -7.6(4)         | -6.2(4)         |
| C17  | 18.6(6)         | 24.1(6)         | 21.1(6)         | 1.9(5)          | -7.2(5)         | -9.2(5)         |
| C18  | 29.5(7)         | 25.3(6)         | 27.4(7)         | 3.2(5)          | -12.2(6)        | -15.8(6)        |

**Table 23. Anisotropic Displacement Parameters ( $\text{\AA}^2 \times 10^3$ ) for 3f. The Anisotropic displacement factor exponent takes the form:  $-2\pi^2[h^2a^*^2U_{11}+2hka^*b^*U_{12}+\dots]$ .**

| Atom | U <sub>11</sub> | U <sub>22</sub> | U <sub>33</sub> | U <sub>23</sub> | U <sub>13</sub> | U <sub>12</sub> |
|------|-----------------|-----------------|-----------------|-----------------|-----------------|-----------------|
| C19  | 32.4(7)         | 18.8(6)         | 23.3(6)         | -0.3(5)         | -10.8(5)        | -9.0(5)         |
| C20  | 22.7(6)         | 22.7(6)         | 20.0(6)         | -0.3(5)         | -5.2(5)         | -4.6(5)         |
| C21  | 18.8(6)         | 22.8(6)         | 18.4(5)         | 2.7(4)          | -6.1(5)         | -9.2(5)         |
| C22  | 34.5(8)         | 19.2(6)         | 40.8(8)         | 7.8(6)          | -24.5(7)        | -4.6(5)         |

**Table 24. Bond Lengths for 3f.**

| Atom | Atom | Length/ $\text{\AA}$ | Atom | Atom | Length/ $\text{\AA}$ |
|------|------|----------------------|------|------|----------------------|
| Fe1  | C1   | 2.0502(12)           | C1   | C13  | 1.4737(16)           |
| Fe1  | C2   | 2.0291(12)           | C2   | C3   | 1.4235(16)           |
| Fe1  | C3   | 2.0495(13)           | C2   | C11  | 1.4938(16)           |
| Fe1  | C4   | 2.0511(13)           | C3   | C4   | 1.4258(18)           |
| Fe1  | C5   | 2.0385(13)           | C4   | C5   | 1.4286(18)           |
| Fe1  | C6   | 2.0458(16)           | C6   | C7   | 1.414(3)             |
| Fe1  | C7   | 2.0473(16)           | C6   | C10  | 1.422(3)             |
| Fe1  | C8   | 2.0455(15)           | C7   | C8   | 1.422(2)             |
| Fe1  | C9   | 2.0511(14)           | C8   | C9   | 1.411(2)             |
| Fe1  | C10  | 2.0488(15)           | C9   | C10  | 1.425(2)             |
| S1   | O1   | 1.4239(10)           | C12  | C13  | 1.5199(16)           |
| S1   | O2   | 1.4269(10)           | C13  | C14  | 1.3501(17)           |
| S1   | N1   | 1.5807(10)           | C14  | C15  | 1.5148(17)           |
| S1   | C22  | 1.8334(15)           | C14  | C16  | 1.4922(17)           |
| F1   | C22  | 1.3234(19)           | C16  | C17  | 1.3963(18)           |
| F2   | C22  | 1.3212(18)           | C16  | C21  | 1.3982(17)           |
| F3   | C22  | 1.332(2)             | C17  | C18  | 1.3918(19)           |
| N1   | C11  | 1.4731(15)           | C18  | C19  | 1.387(2)             |
| N1   | C12  | 1.4781(15)           | C19  | C20  | 1.386(2)             |

**Table 24. Bond Lengths for 3f.**

| Atom | Atom | Length/Å   | Atom | Atom | Length/Å   |
|------|------|------------|------|------|------------|
| C1   | C2   | 1.4393(16) | C20  | C21  | 1.3953(19) |
| C1   | C5   | 1.4417(16) |      |      |            |

**Table 25. Bond Angles for 3f.**

| Atom | Atom | Atom | Angle/°   | Atom | Atom | Atom | Angle/°    |
|------|------|------|-----------|------|------|------|------------|
| C1   | Fe1  | C4   | 69.12(5)  | C2   | C1   | C13  | 121.40(10) |
| C1   | Fe1  | C9   | 151.51(6) | C5   | C1   | Fe1  | 68.92(7)   |
| C2   | Fe1  | C1   | 41.32(5)  | C5   | C1   | C13  | 132.17(11) |
| C2   | Fe1  | C3   | 40.85(5)  | C13  | C1   | Fe1  | 125.28(8)  |
| C2   | Fe1  | C4   | 68.52(5)  | C1   | C2   | Fe1  | 70.13(7)   |
| C2   | Fe1  | C5   | 69.10(5)  | C1   | C2   | C11  | 123.00(10) |
| C2   | Fe1  | C6   | 117.47(6) | C3   | C2   | Fe1  | 70.34(7)   |
| C2   | Fe1  | C7   | 107.56(6) | C3   | C2   | C1   | 109.30(10) |
| C2   | Fe1  | C8   | 128.33(6) | C3   | C2   | C11  | 127.69(11) |
| C2   | Fe1  | C9   | 166.43(6) | C11  | C2   | Fe1  | 126.19(8)  |
| C2   | Fe1  | C10  | 151.26(6) | C2   | C3   | Fe1  | 68.81(7)   |
| C3   | Fe1  | C1   | 69.44(5)  | C2   | C3   | C4   | 107.44(11) |
| C3   | Fe1  | C4   | 40.69(5)  | C4   | C3   | Fe1  | 69.71(8)   |
| C3   | Fe1  | C9   | 128.64(6) | C3   | C4   | Fe1  | 69.59(7)   |
| C4   | Fe1  | C9   | 108.88(6) | C3   | C4   | C5   | 108.54(11) |
| C5   | Fe1  | C1   | 41.29(5)  | C5   | C4   | Fe1  | 69.08(8)   |
| C5   | Fe1  | C3   | 69.06(5)  | C1   | C5   | Fe1  | 69.79(7)   |
| C5   | Fe1  | C4   | 40.89(5)  | C4   | C5   | Fe1  | 70.03(8)   |
| C5   | Fe1  | C6   | 127.07(7) | C4   | C5   | C1   | 108.31(11) |
| C5   | Fe1  | C7   | 165.07(6) | C7   | C6   | Fe1  | 69.85(9)   |
| C5   | Fe1  | C8   | 152.48(6) | C7   | C6   | C10  | 108.10(15) |

**Table 25. Bond Angles for 3f.**

| Atom | Atom | Atom | Angle/°   | Atom | Atom | Atom | Angle/°    |
|------|------|------|-----------|------|------|------|------------|
| C5   | Fe1  | C9   | 118.30(6) | C10  | C6   | Fe1  | 69.79(9)   |
| C5   | Fe1  | C10  | 107.33(7) | C6   | C7   | Fe1  | 69.73(10)  |
| C6   | Fe1  | C1   | 106.28(6) | C6   | C7   | C8   | 107.76(16) |
| C6   | Fe1  | C3   | 151.69(7) | C8   | C7   | Fe1  | 69.60(9)   |
| C6   | Fe1  | C4   | 165.87(7) | C7   | C8   | Fe1  | 69.74(9)   |
| C6   | Fe1  | C7   | 40.42(8)  | C9   | C8   | Fe1  | 70.06(9)   |
| C6   | Fe1  | C9   | 68.39(7)  | C9   | C8   | C7   | 108.56(15) |
| C6   | Fe1  | C10  | 40.65(8)  | C8   | C9   | Fe1  | 69.63(8)   |
| C7   | Fe1  | C1   | 126.74(6) | C8   | C9   | C10  | 107.65(15) |
| C7   | Fe1  | C3   | 118.59(6) | C10  | C9   | Fe1  | 69.57(9)   |
| C7   | Fe1  | C4   | 152.82(7) | C6   | C10  | Fe1  | 69.56(9)   |
| C7   | Fe1  | C9   | 68.28(7)  | C6   | C10  | C9   | 107.93(16) |
| C7   | Fe1  | C10  | 68.19(8)  | C9   | C10  | Fe1  | 69.75(9)   |
| C8   | Fe1  | C1   | 165.71(6) | N1   | C11  | C2   | 106.47(9)  |
| C8   | Fe1  | C3   | 108.86(6) | N1   | C12  | C13  | 112.09(10) |
| C8   | Fe1  | C4   | 119.46(6) | C1   | C13  | C12  | 113.58(10) |
| C8   | Fe1  | C6   | 68.10(7)  | C14  | C13  | C1   | 126.41(11) |
| C8   | Fe1  | C7   | 40.65(7)  | C14  | C13  | C12  | 119.65(10) |
| C8   | Fe1  | C9   | 40.31(7)  | C13  | C14  | C15  | 123.49(11) |
| C8   | Fe1  | C10  | 68.00(7)  | C13  | C14  | C16  | 122.07(11) |
| C10  | Fe1  | C1   | 116.95(6) | C16  | C14  | C15  | 114.41(10) |
| C10  | Fe1  | C3   | 166.60(7) | C17  | C16  | C14  | 119.40(11) |
| C10  | Fe1  | C4   | 128.38(7) | C17  | C16  | C21  | 118.44(12) |
| C10  | Fe1  | C9   | 40.68(7)  | C21  | C16  | C14  | 122.10(11) |
| O1   | S1   | O2   | 121.70(7) | C18  | C17  | C16  | 120.93(12) |
| O1   | S1   | N1   | 110.52(6) | C19  | C18  | C17  | 120.07(13) |

**Table 25. Bond Angles for 3f.**

| Atom Atom Atom Angle/° |    |     |            | Atom Atom Atom Angle/° |     |     |            |
|------------------------|----|-----|------------|------------------------|-----|-----|------------|
| O1                     | S1 | C22 | 104.26(7)  | C20                    | C19 | C18 | 119.71(13) |
| O2                     | S1 | N1  | 109.57(6)  | C19                    | C20 | C21 | 120.33(13) |
| O2                     | S1 | C22 | 104.05(7)  | C20                    | C21 | C16 | 120.51(12) |
| N1                     | S1 | C22 | 105.14(7)  | F1                     | C22 | S1  | 110.53(10) |
| C11                    | N1 | S1  | 121.92(8)  | F1                     | C22 | F3  | 108.39(15) |
| C11                    | N1 | C12 | 114.94(9)  | F2                     | C22 | S1  | 110.87(12) |
| C12                    | N1 | S1  | 120.89(8)  | F2                     | C22 | F1  | 108.62(13) |
| C2                     | C1 | Fe1 | 68.56(7)   | F2                     | C22 | F3  | 108.43(13) |
| C2                     | C1 | C5  | 106.39(10) | F3                     | C22 | S1  | 109.93(10) |

**Table 26. Hydrogen Bonds for 3f.**

| D   | H    | A               | d(D-H)/Å  | d(H-A)/Å  | d(D-A)/Å   | D-H-A/°   |
|-----|------|-----------------|-----------|-----------|------------|-----------|
| C11 | H11B | O2              | 0.913(19) | 2.421(18) | 2.8828(15) | 111.4(13) |
| C11 | H11B | O2 <sup>1</sup> | 0.913(19) | 2.496(19) | 3.2966(16) | 146.6(15) |
| C12 | H12A | O1              | 0.916(18) | 2.513(18) | 2.9685(16) | 111.2(13) |

<sup>1</sup>1-X,1-Y,-Z**Table 27. Torsion Angles for 3f.**

| A   | B  | C   | D   | Angle/°    | A  | B  | C   | D   | Angle/°    |
|-----|----|-----|-----|------------|----|----|-----|-----|------------|
| Fe1 | C1 | C2  | C3  | -59.63(8)  | C3 | C4 | C5  | Fe1 | 58.54(9)   |
| Fe1 | C1 | C2  | C11 | 120.93(11) | C3 | C4 | C5  | C1  | -0.97(15)  |
| Fe1 | C1 | C5  | C4  | 59.66(9)   | C5 | C1 | C2  | Fe1 | 58.78(8)   |
| Fe1 | C1 | C13 | C12 | -88.71(12) | C5 | C1 | C2  | C3  | -0.85(14)  |
| Fe1 | C1 | C13 | C14 | 98.37(14)  | C5 | C1 | C2  | C11 | 179.71(11) |
| Fe1 | C2 | C3  | C4  | -59.23(9)  | C5 | C1 | C13 | C12 | 178.64(13) |
| Fe1 | C2 | C11 | N1  | 62.36(13)  | C5 | C1 | C13 | C14 | 5.7(2)     |

**Table 27. Torsion Angles for 3f.**

| A   | B   | C   | D   | Angle/°     | A   | B   | C   | D   | Angle/°     |
|-----|-----|-----|-----|-------------|-----|-----|-----|-----|-------------|
| Fe1 | C3  | C4  | C5  | -58.22(10)  | C6  | C7  | C8  | Fe1 | -59.52(10)  |
| Fe1 | C4  | C5  | C1  | -59.51(9)   | C6  | C7  | C8  | C9  | -0.01(17)   |
| Fe1 | C6  | C7  | C8  | 59.44(10)   | C7  | C6  | C10 | Fe1 | 59.57(11)   |
| Fe1 | C6  | C10 | C9  | -59.41(11)  | C7  | C6  | C10 | C9  | 0.16(18)    |
| Fe1 | C7  | C8  | C9  | 59.51(11)   | C7  | C8  | C9  | Fe1 | -59.32(10)  |
| Fe1 | C8  | C9  | C10 | 59.42(11)   | C7  | C8  | C9  | C10 | 0.10(17)    |
| Fe1 | C9  | C10 | C6  | 59.29(11)   | C8  | C9  | C10 | Fe1 | -59.45(11)  |
| S1  | N1  | C11 | C2  | -140.89(9)  | C8  | C9  | C10 | C6  | -0.16(18)   |
| S1  | N1  | C12 | C13 | 134.89(9)   | C10 | C6  | C7  | Fe1 | -59.53(11)  |
| O1  | S1  | N1  | C11 | 159.04(10)  | C10 | C6  | C7  | C8  | -0.09(17)   |
| O1  | S1  | N1  | C12 | -38.89(11)  | C11 | N1  | C12 | C13 | -61.86(13)  |
| O1  | S1  | C22 | F1  | 49.65(13)   | C11 | C2  | C3  | Fe1 | -121.09(12) |
| O1  | S1  | C22 | F2  | -70.86(12)  | C11 | C2  | C3  | C4  | 179.68(12)  |
| O1  | S1  | C22 | F3  | 169.27(11)  | C12 | N1  | C11 | C2  | 56.05(13)   |
| O2  | S1  | N1  | C11 | 22.28(12)   | C12 | C13 | C14 | C15 | -171.24(12) |
| O2  | S1  | N1  | C12 | -175.65(10) | C12 | C13 | C14 | C16 | 6.87(18)    |
| O2  | S1  | C22 | F1  | 178.15(11)  | C13 | C1  | C2  | Fe1 | -119.16(11) |
| O2  | S1  | C22 | F2  | 57.64(13)   | C13 | C1  | C2  | C3  | -178.79(11) |
| O2  | S1  | C22 | F3  | -62.23(12)  | C13 | C1  | C2  | C11 | 1.77(18)    |
| N1  | S1  | C22 | F1  | -66.67(13)  | C13 | C1  | C5  | Fe1 | 119.08(14)  |
| N1  | S1  | C22 | F2  | 172.82(11)  | C13 | C1  | C5  | C4  | 178.74(13)  |
| N1  | S1  | C22 | F3  | 52.95(12)   | C13 | C14 | C16 | C17 | -119.96(14) |
| N1  | C12 | C13 | C1  | 31.66(14)   | C13 | C14 | C16 | C21 | 63.14(17)   |
| N1  | C12 | C13 | C14 | -154.89(11) | C14 | C16 | C17 | C18 | -177.84(12) |
| C1  | C2  | C3  | Fe1 | 59.50(8)    | C14 | C16 | C21 | C20 | 177.82(12)  |
| C1  | C2  | C3  | C4  | 0.27(14)    | C15 | C14 | C16 | C17 | 58.31(16)   |

**Table 27. Torsion Angles for 3f.**

| A  | B   | C   | D   | Angle/°     | A   | B   | C   | D   | Angle/°     |
|----|-----|-----|-----|-------------|-----|-----|-----|-----|-------------|
| C1 | C2  | C11 | N1  | -26.10(15)  | C15 | C14 | C16 | C21 | -118.59(14) |
| C1 | C13 | C14 | C15 | 1.3(2)      | C16 | C17 | C18 | C19 | 0.3(2)      |
| C1 | C13 | C14 | C16 | 179.40(11)  | C17 | C16 | C21 | C20 | 0.90(19)    |
| C2 | C1  | C5  | Fe1 | -58.55(8)   | C17 | C18 | C19 | C20 | 0.1(2)      |
| C2 | C1  | C5  | C4  | 1.11(14)    | C18 | C19 | C20 | C21 | 0.0(2)      |
| C2 | C1  | C13 | C12 | -4.03(16)   | C19 | C20 | C21 | C16 | -0.5(2)     |
| C2 | C1  | C13 | C14 | -176.96(12) | C21 | C16 | C17 | C18 | -0.83(19)   |
| C2 | C3  | C4  | Fe1 | 58.66(8)    | C22 | S1  | N1  | C11 | -89.01(11)  |
| C2 | C3  | C4  | C5  | 0.44(15)    | C22 | S1  | N1  | C12 | 73.06(11)   |
| C3 | C2  | C11 | N1  | 154.57(12)  |     |     |     |     |             |

**Table 28. Hydrogen Atom Coordinates ( $\text{\AA} \times 10^4$ ) and Isotropic Displacement Parameters ( $\text{\AA}^2 \times 10^3$ ) for 3f.**

| Atom | x         | y        | z        | U(eq) |
|------|-----------|----------|----------|-------|
| H3   | 8960(20)  | 2051(18) | -760(17) | 22(4) |
| H4   | 10920(20) | 553(19)  | 173(16)  | 21(4) |
| H5   | 10980(20) | 2020(18) | 1841(17) | 23(4) |
| H6   | 5870(30)  | 4380(20) | 3790(20) | 42(6) |
| H7   | 4880(30)  | 3840(20) | 2180(20) | 46(6) |
| H8   | 6260(20)  | 1230(20) | 1447(19) | 32(5) |
| H9   | 8100(30)  | 170(20)  | 2640(20) | 37(5) |
| H10  | 7850(30)  | 2080(30) | 4040(20) | 55(7) |
| H11A | 7911(19)  | 5443(17) | -449(15) | 15(4) |
| H11B | 6630(20)  | 4865(18) | 65(17)   | 23(4) |
| H12A | 7030(20)  | 7072(19) | 2527(17) | 21(4) |
| H12B | 8280(20)  | 6718(19) | 1216(17) | 24(4) |
| H15A | 10350(20) | 3470(20) | 3654(18) | 30(5) |

**Table 28. Hydrogen Atom Coordinates ( $\text{\AA}\times 10^4$ ) and Isotropic Displacement Parameters ( $\text{\AA}^2\times 10^3$ ) for 3f.**

| <b>Atom</b> | <b>x</b>  | <b>y</b>  | <b>z</b> | <b>U(eq)</b> |
|-------------|-----------|-----------|----------|--------------|
| H15B        | 11780(20) | 3530(20)  | 2429(19) | 30(5)        |
| H15C        | 11240(30) | 4470(30)  | 3720(20) | 56(7)        |
| H17         | 11180(20) | 6688(19)  | 3004(17) | 23(4)        |
| H18         | 10390(20) | 8820(20)  | 4193(18) | 30(5)        |
| H19         | 7700(20)  | 10020(20) | 5621(18) | 30(5)        |
| H20         | 5800(20)  | 9080(20)  | 5884(19) | 32(5)        |
| H21         | 6610(20)  | 6930(20)  | 4700(18) | 31(5)        |



# <sup>1</sup>H NMR Spectrum of **1a**

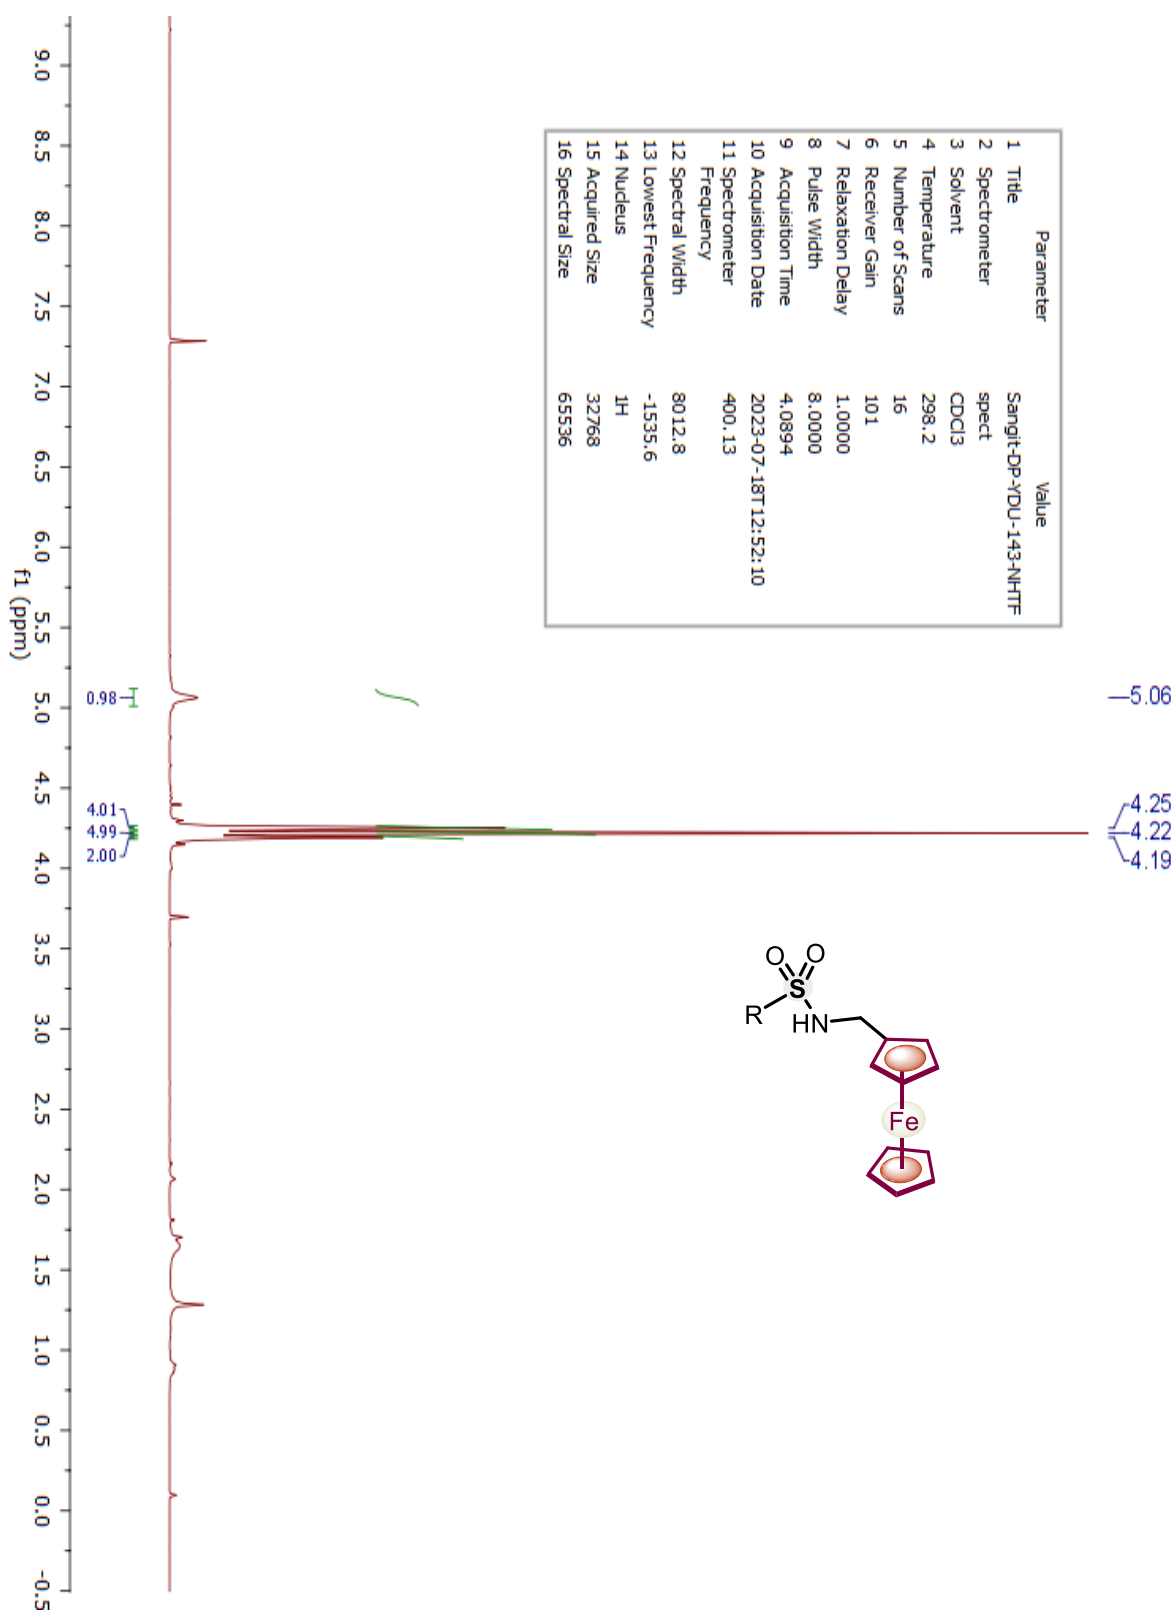

# $^{13}\text{C}\{^1\text{H}\}$ NMR Spectrum of **1a**

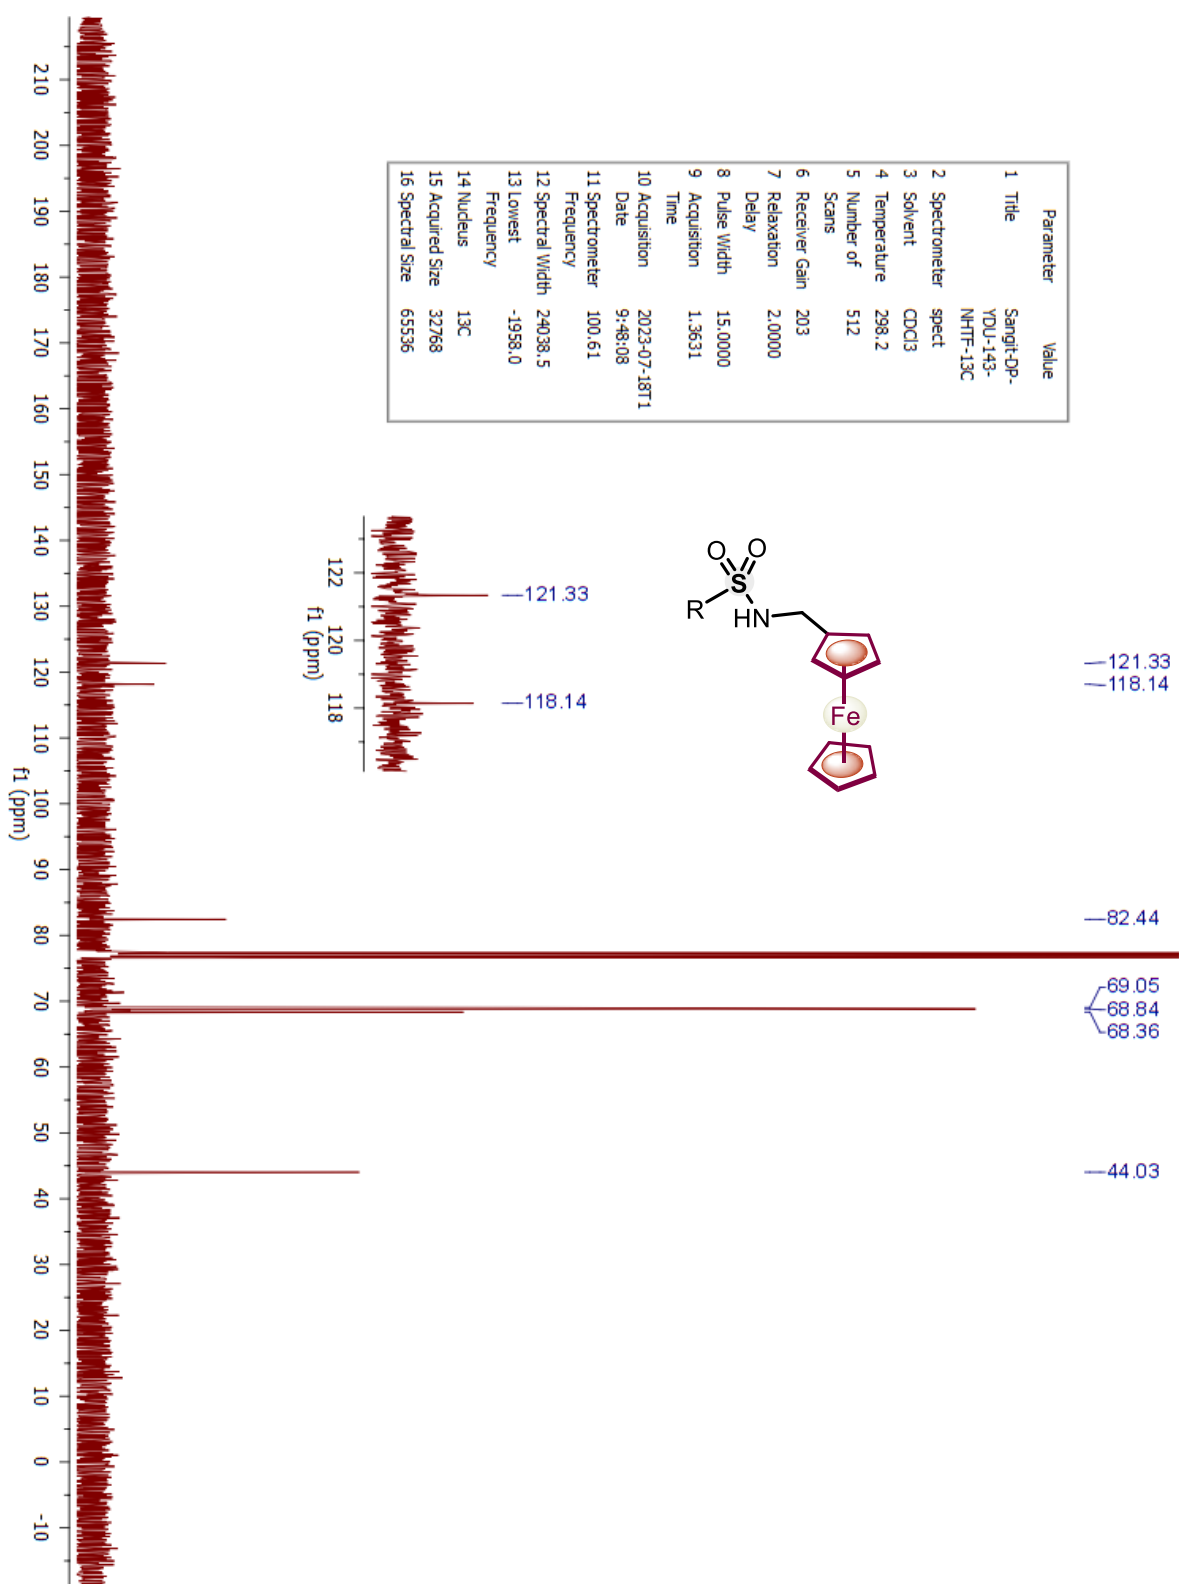

| Parameter                 | Value                      |
|---------------------------|----------------------------|
| 1 Title                   | Sangji-DP-YDU-143-NHTF-13C |
| 2 Spectrometer            | spect                      |
| 3 Solvent                 | CDCl3                      |
| 4 Temperature             | 298.2                      |
| 5 Number of Scans         | 512                        |
| 6 Receiver Gain           | 203                        |
| 7 Relaxation Delay        | 2.0000                     |
| 8 Pulse Width             | 15.0000                    |
| 9 Acquisition Time        | 1.3631                     |
| 10 Acquisition Date       | 2023-07-18T19:48:08        |
| 11 Spectrometer Frequency | 100.61                     |
| 12 Spectral Width         | 24038.5                    |
| 13 Lowest Frequency       | -1958.0                    |
| 14 Nucleus                | $^{13}\text{C}$            |
| 15 Acquired Size          | 32768                      |
| 16 Spectral Size          | 65536                      |

<sup>19</sup>F NMR spectrum of **1a**

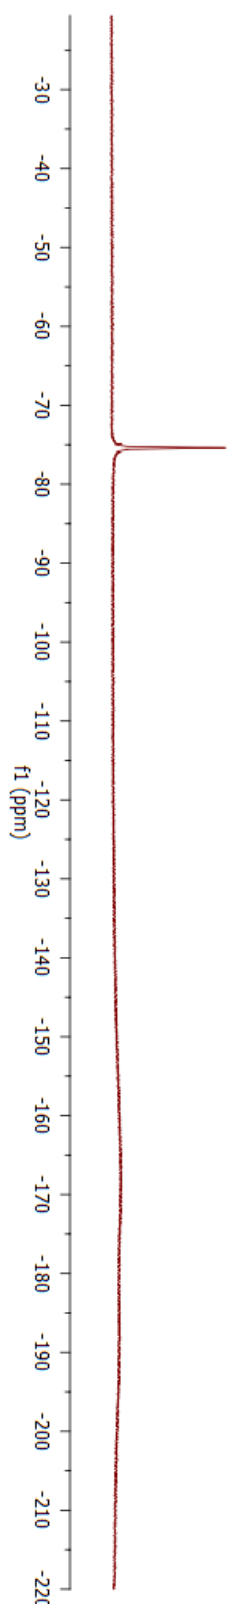

| Parameter                 | Value                         |
|---------------------------|-------------------------------|
| 1 Title                   | Sangt-DP-01-C.030323(500 MHz) |
| 2 Spectrometer            | spect                         |
| 3 Solvent                 | CDCl3                         |
| 4 Temperature             | 298.2                         |
| 5 Number of Scans         | 32                            |
| 6 Receiver Gain           | 203                           |
| 7 Relaxation Delay        | 1.0000                        |
| 8 Pulse Width             | 15.0000                       |
| 9 Acquisition Time        | 0.5767                        |
| 10 Acquisition Date       | 2023-03-03T16:58:52           |
| 11 Spectrometer Frequency | 470.59                        |
| 12 Spectral Width         | 113636.4                      |
| 13 Lowest Frequency       | -103877.2                     |
| 14 Nucleus                | <sup>19</sup> F               |
| 15 Acquired Size          | 65536                         |
| 16 Spectral Size          | 131072                        |

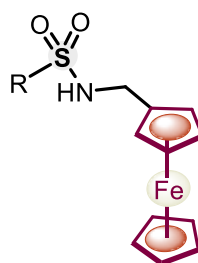

# <sup>1</sup>H NMR Spectrum of **1b**

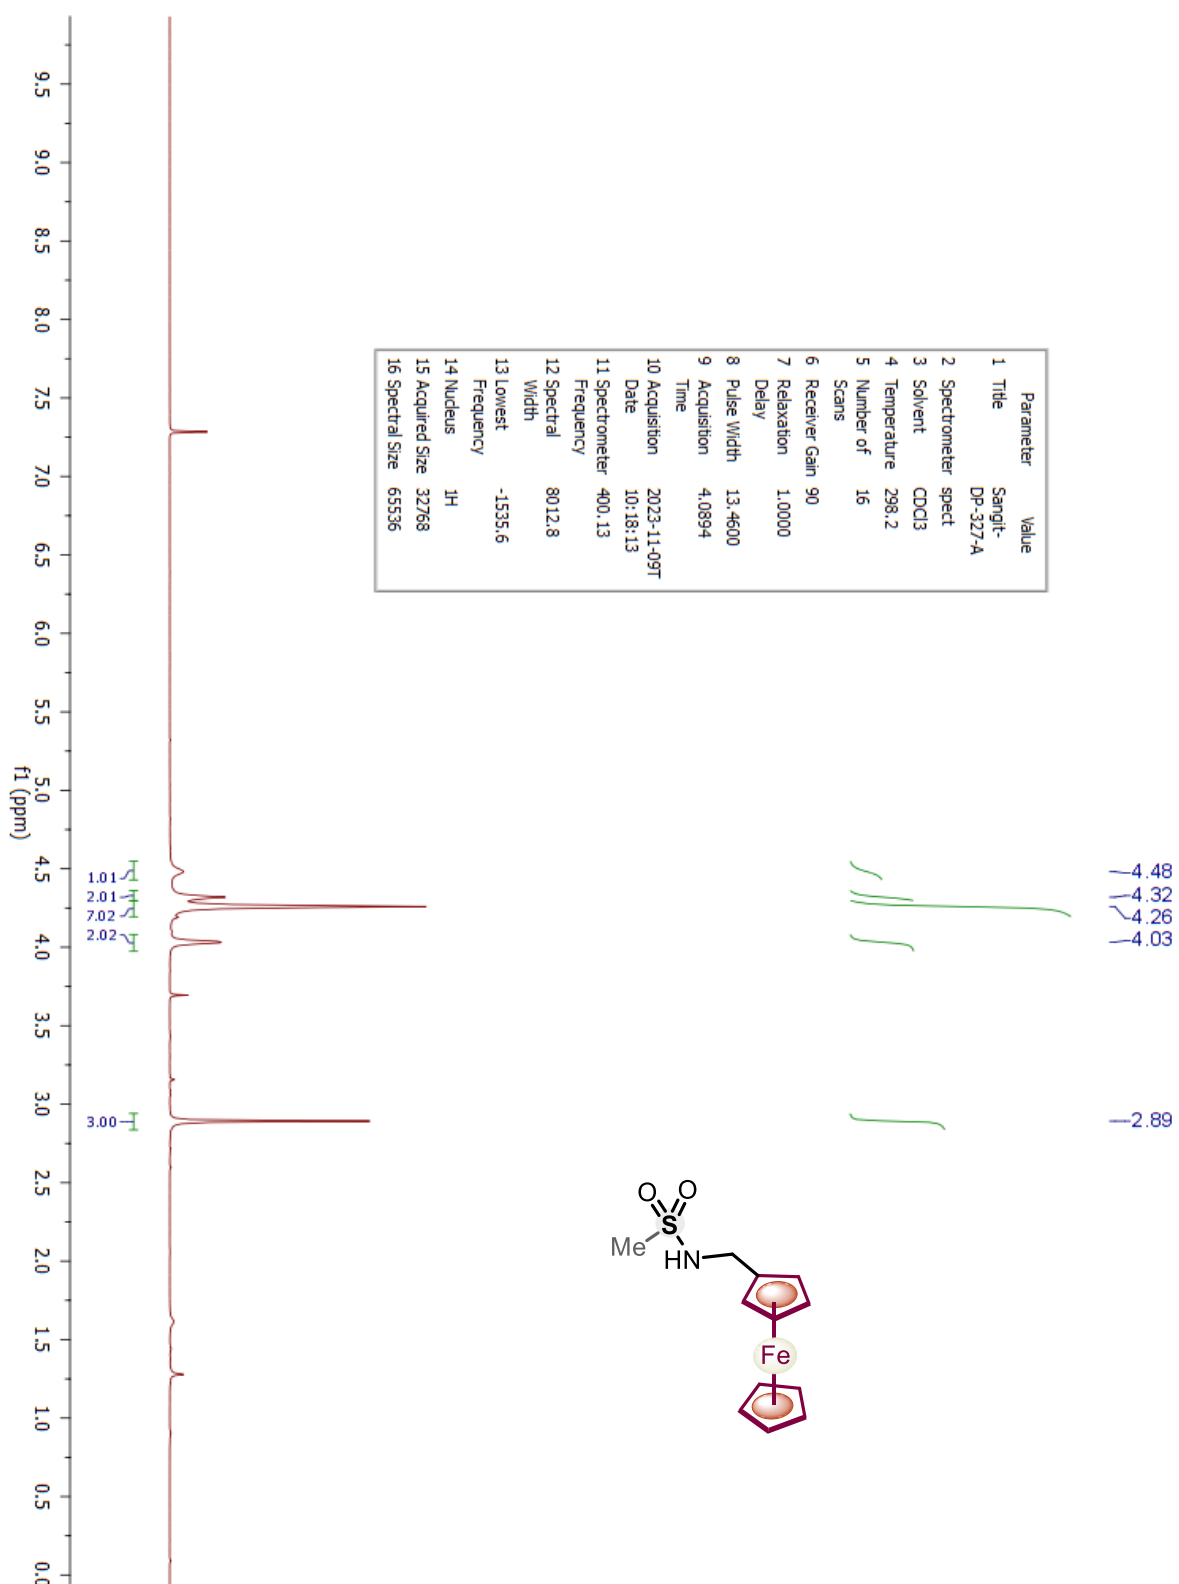

# $^{13}\text{C}\{^1\text{H}\}$ NMR Spectrum of **1b**

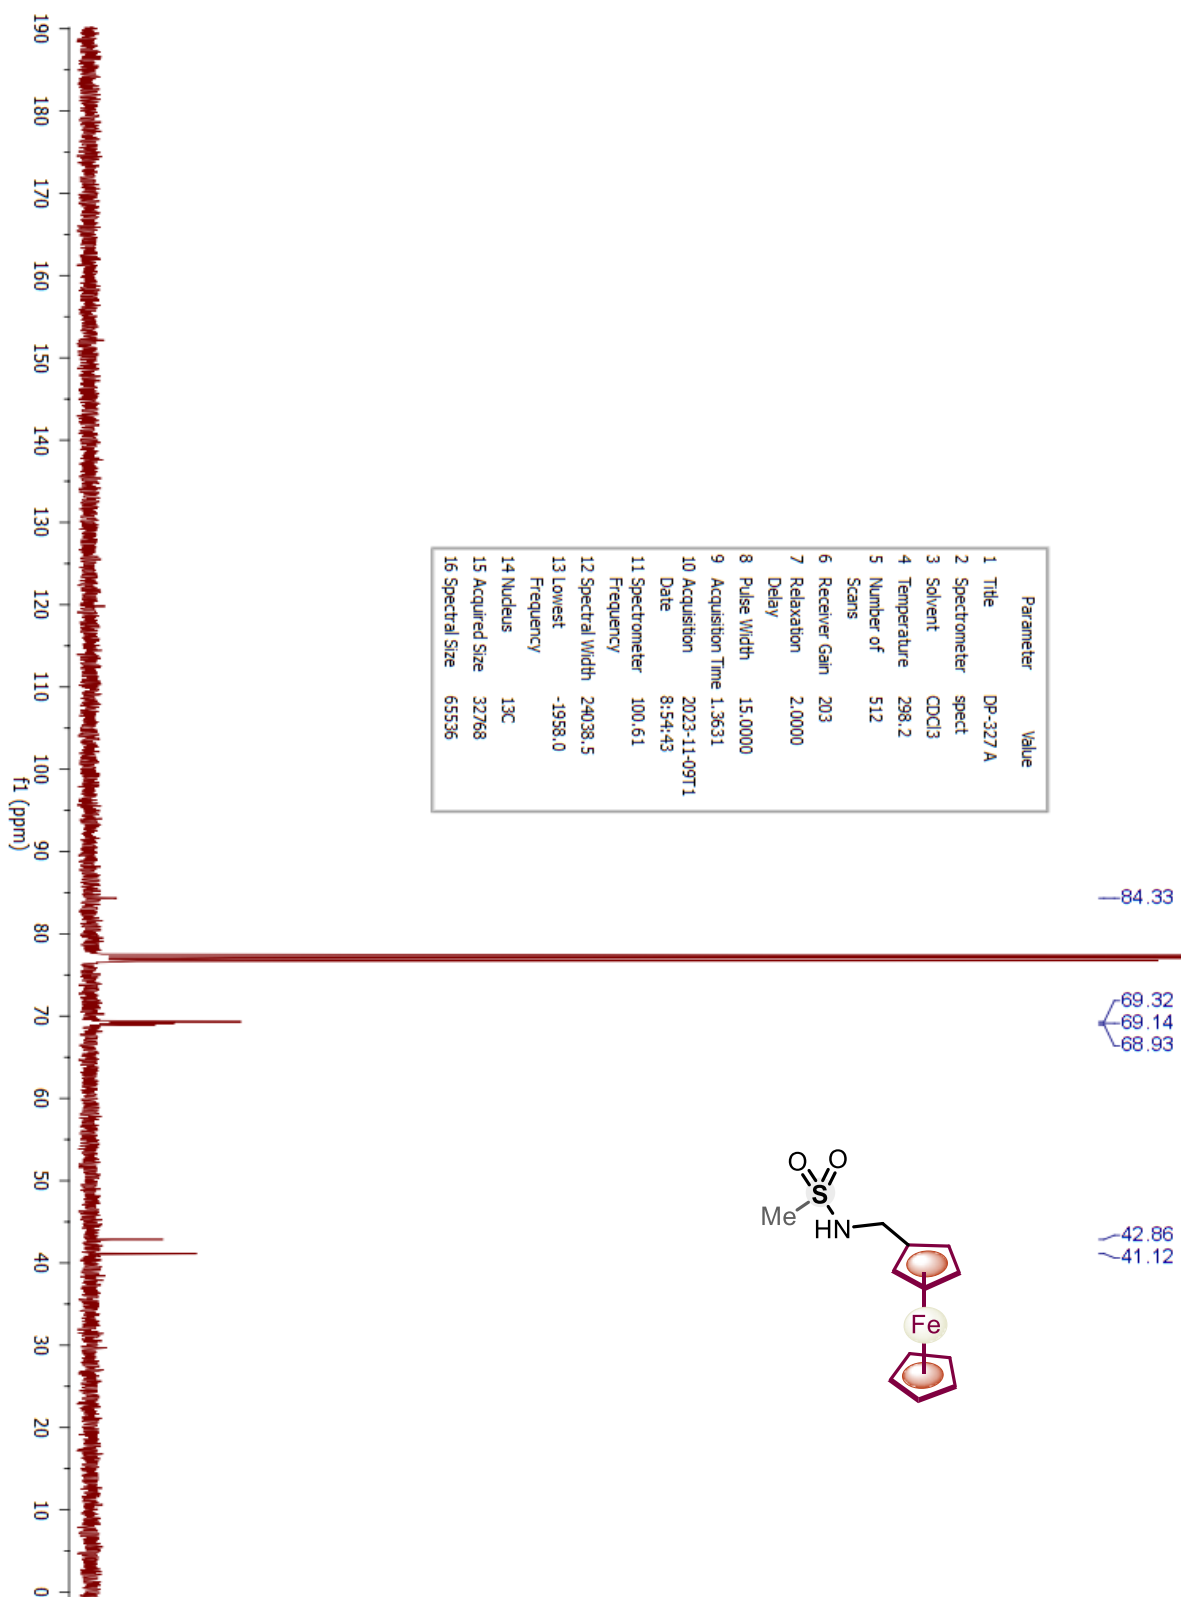

# <sup>1</sup>H NMR Spectrum of **1c**

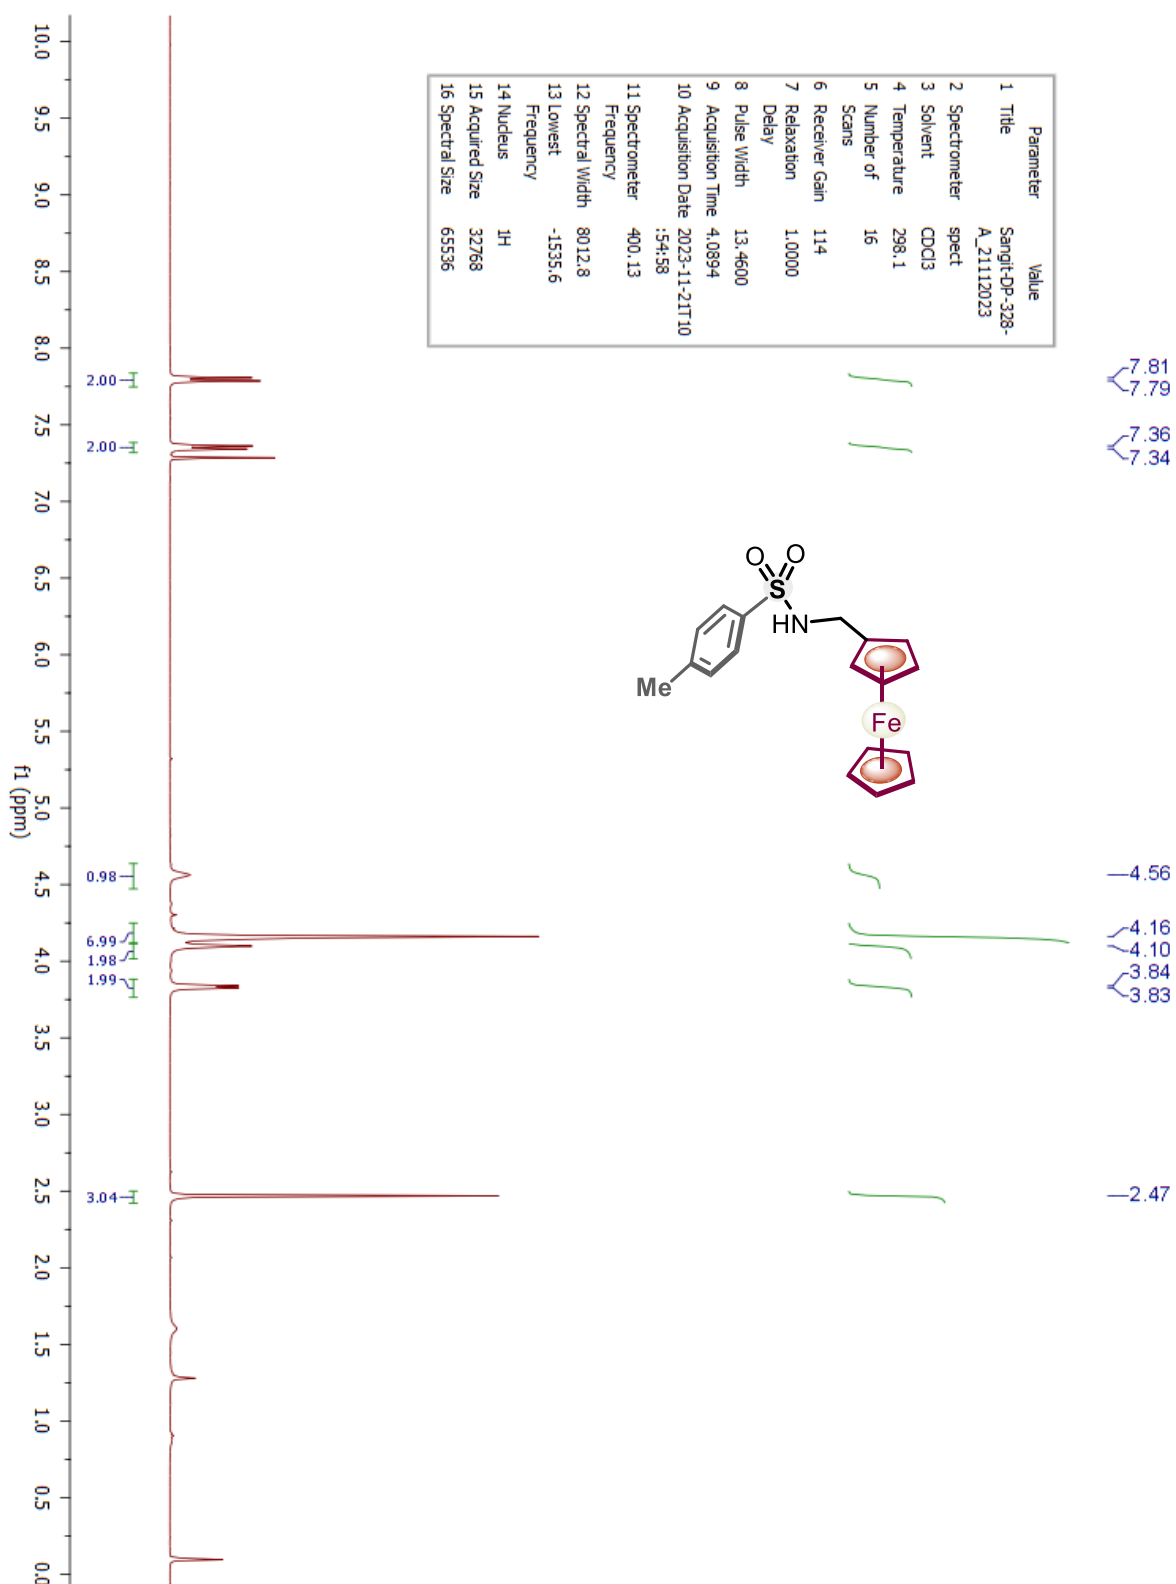

$^{13}\text{C}\{^1\text{H}\}$  NMR Spectrum of **1c**

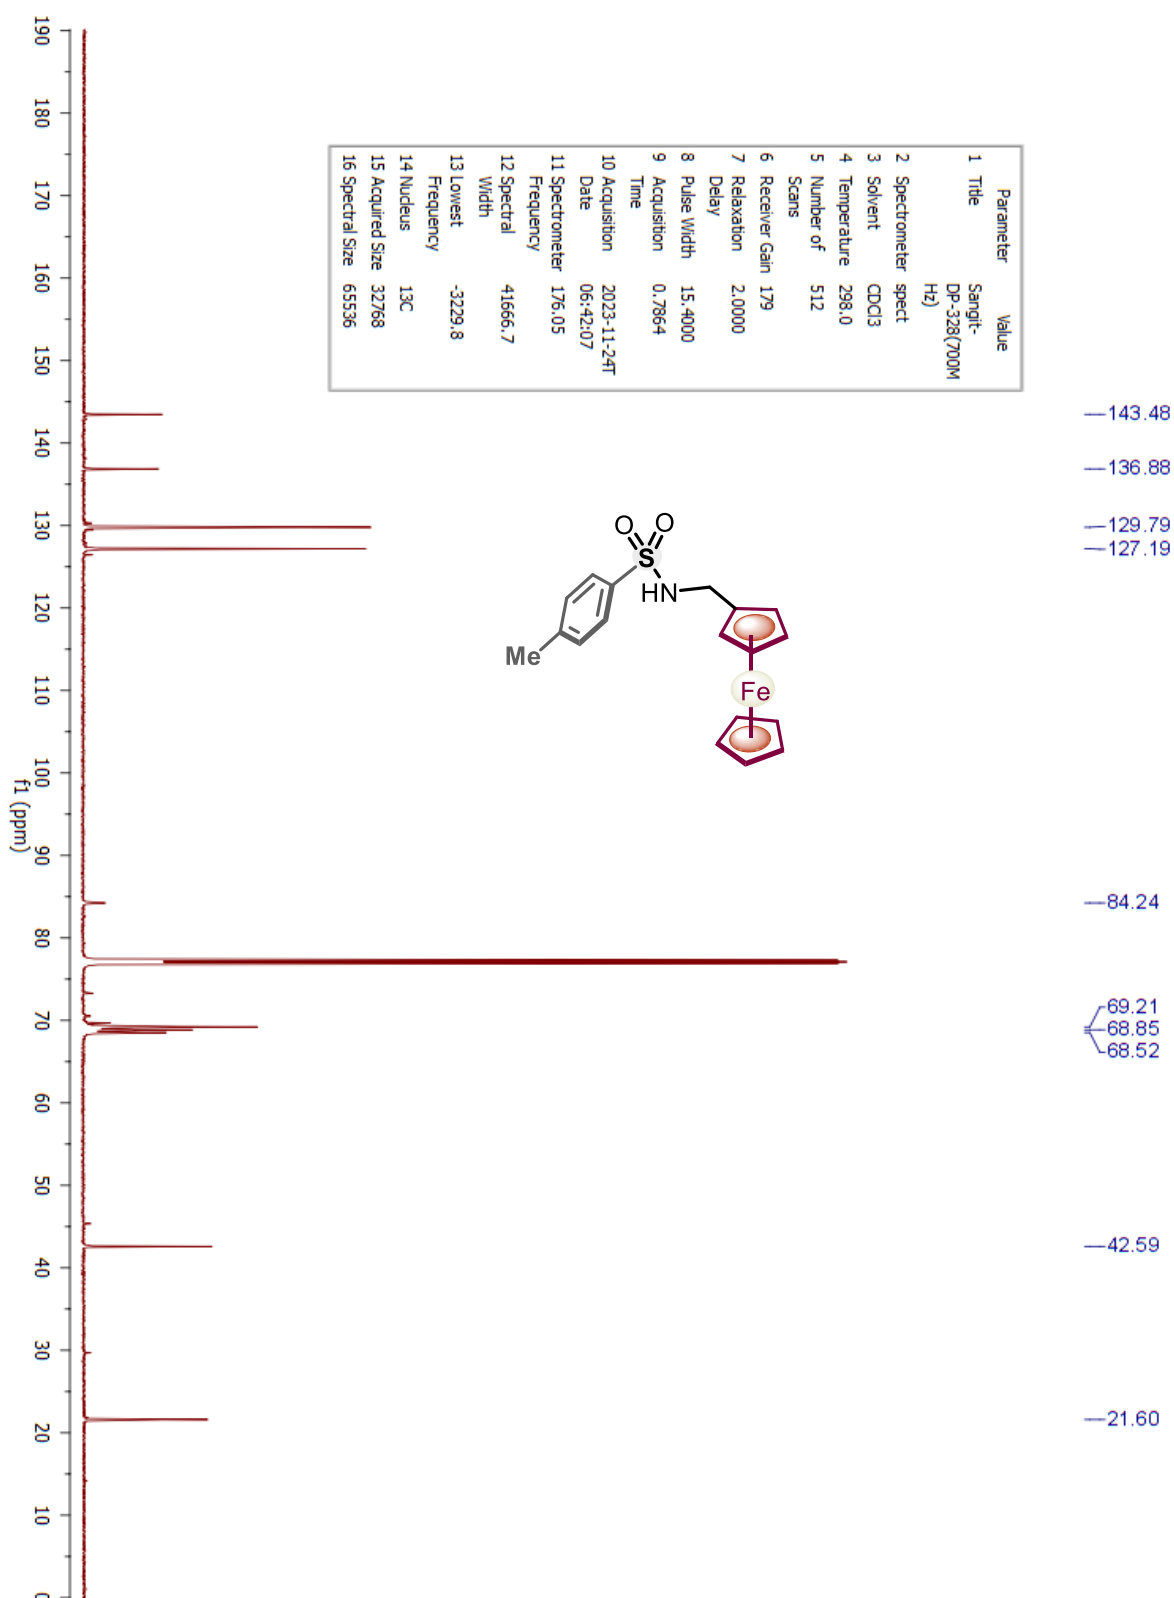

# <sup>1</sup>H NMR Spectrum of **1d**

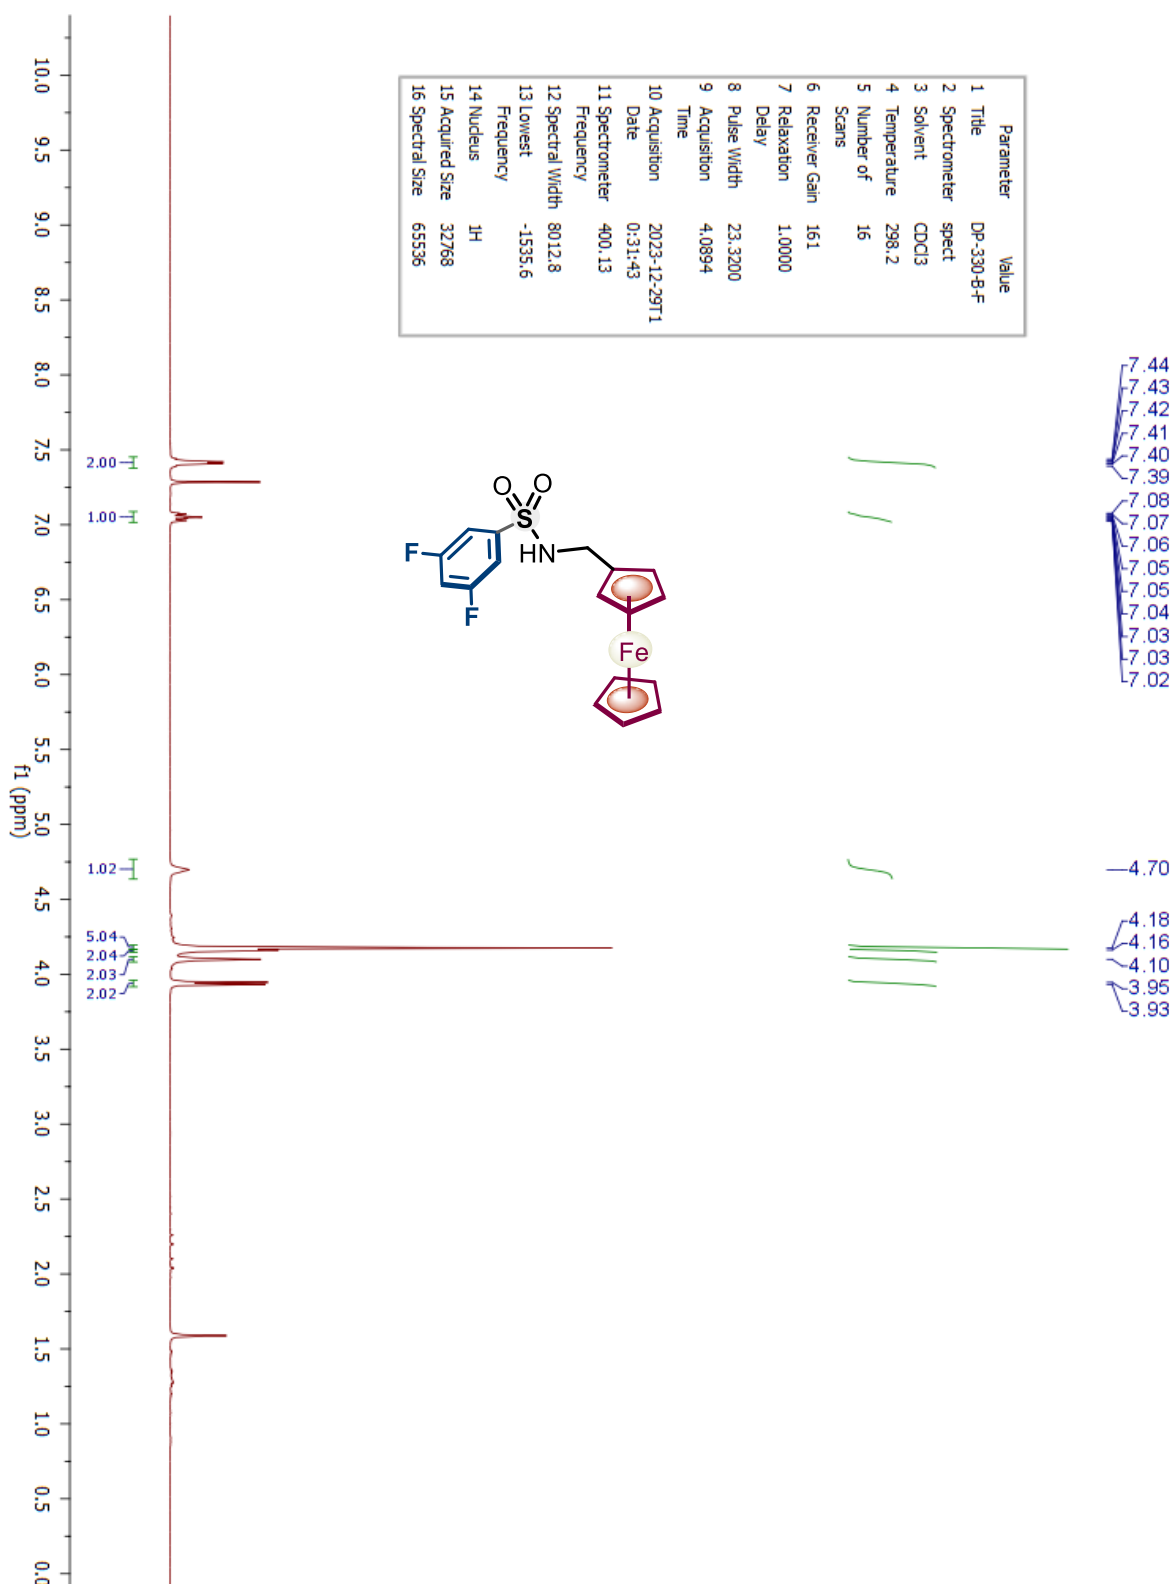



# $^{13}\text{C}\{^1\text{H}\}$ NMR Spectrum of **1d**

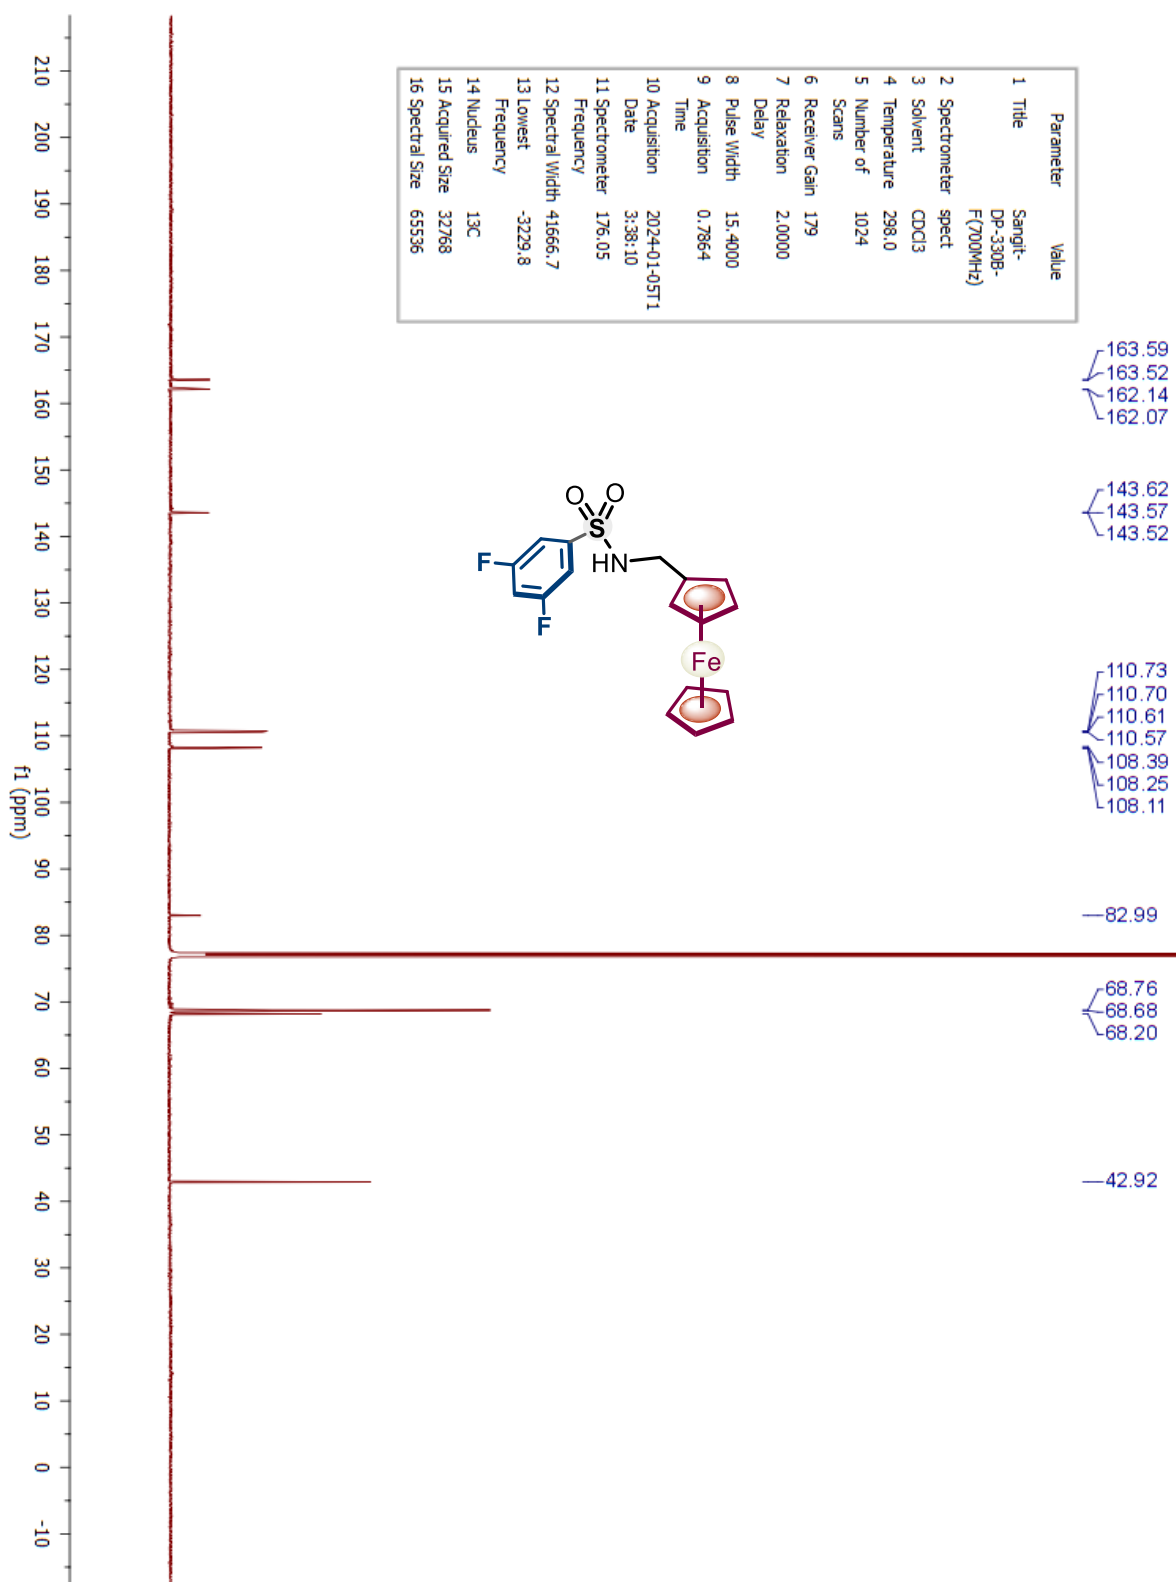

| Parameter                 | Value                     |
|---------------------------|---------------------------|
| 1 Title                   | Sample- DP-330B-F(700MHz) |
| 2 Spectrometer            | spect                     |
| 3 Solvent                 | CDCl3                     |
| 4 Temperature             | 298.0                     |
| 5 Number of Scans         | 1024                      |
| 6 Receiver Gain           | 179                       |
| 7 Relaxation Delay        | 2.0000                    |
| 8 Pulse Width             | 15.4000                   |
| 9 Acquisition Time        | 0.7864                    |
| 10 Acquisition Date       | 2024-01-05T13:38:10       |
| 11 Spectrometer Frequency | 176.05                    |
| 12 Spectral Width         | 41666.7                   |
| 13 Lowest Frequency       | -3229.8                   |
| 14 Nucleus                | $^{13}\text{C}$           |
| 15 Acquired Size          | 32768                     |
| 16 Spectral Size          | 65536                     |

# <sup>19</sup>F NMR Spectrum of **1d**

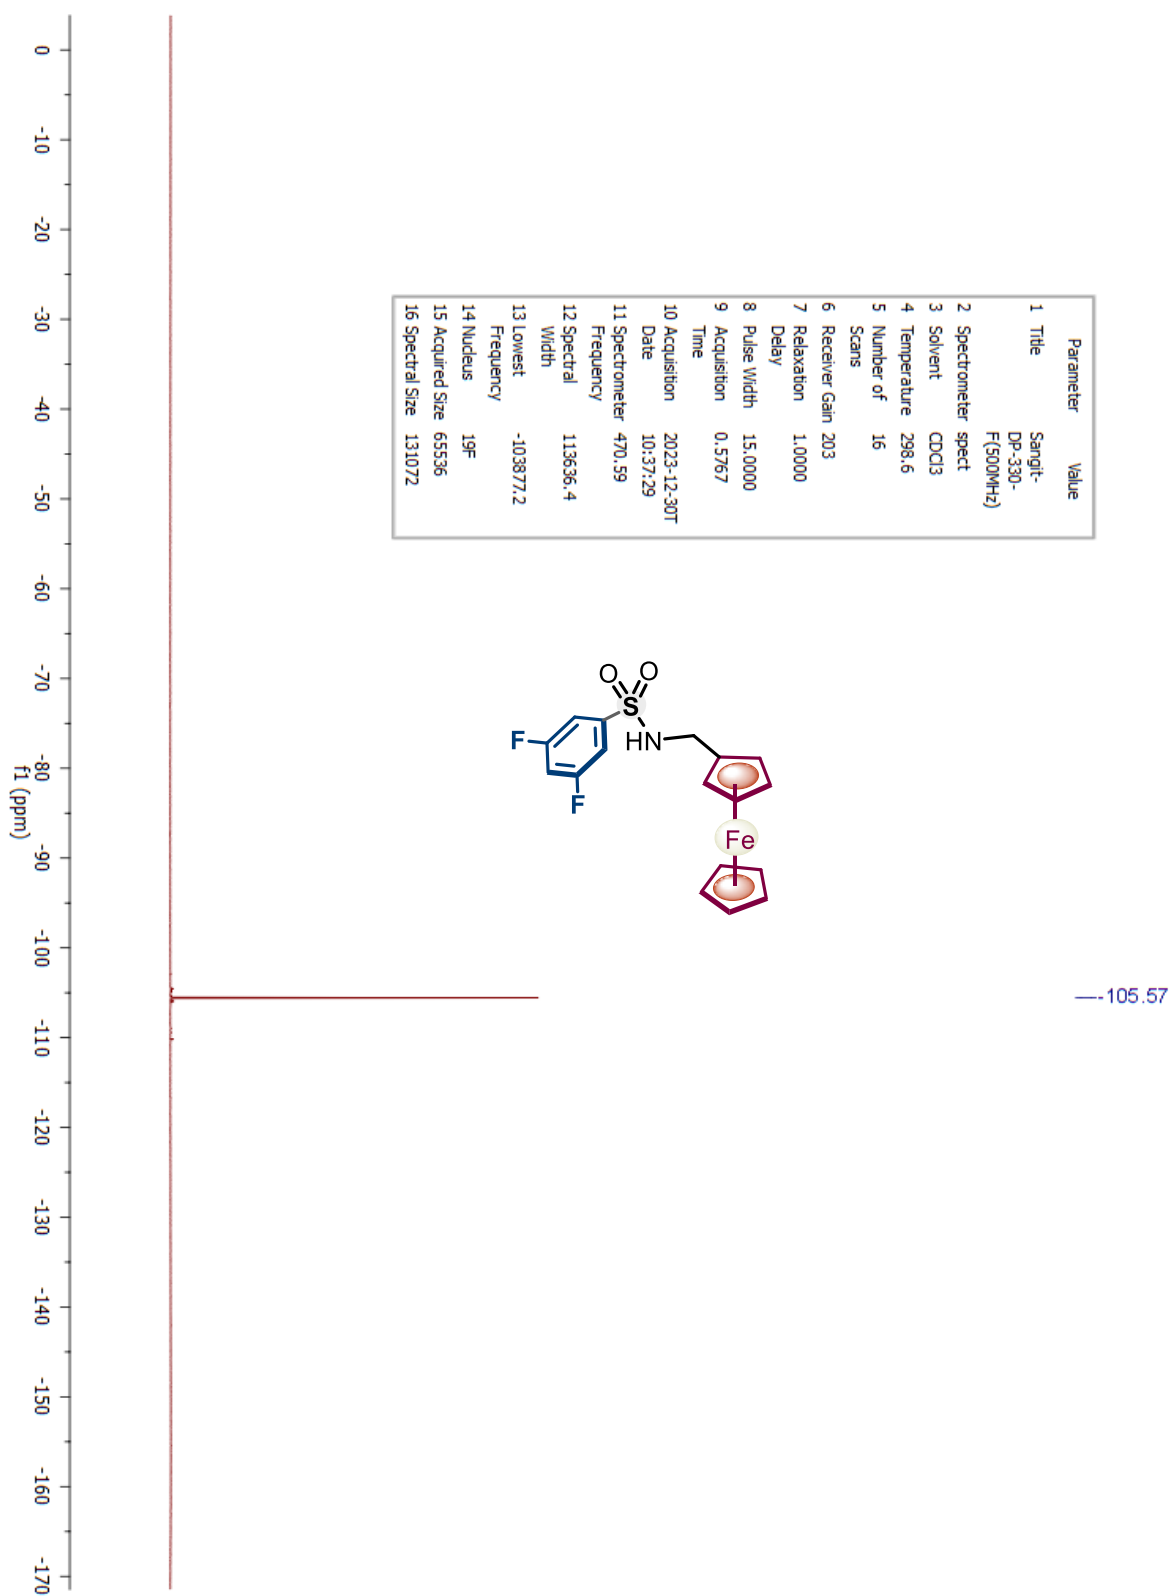

# <sup>1</sup>H NMR Spectrum of **1e**

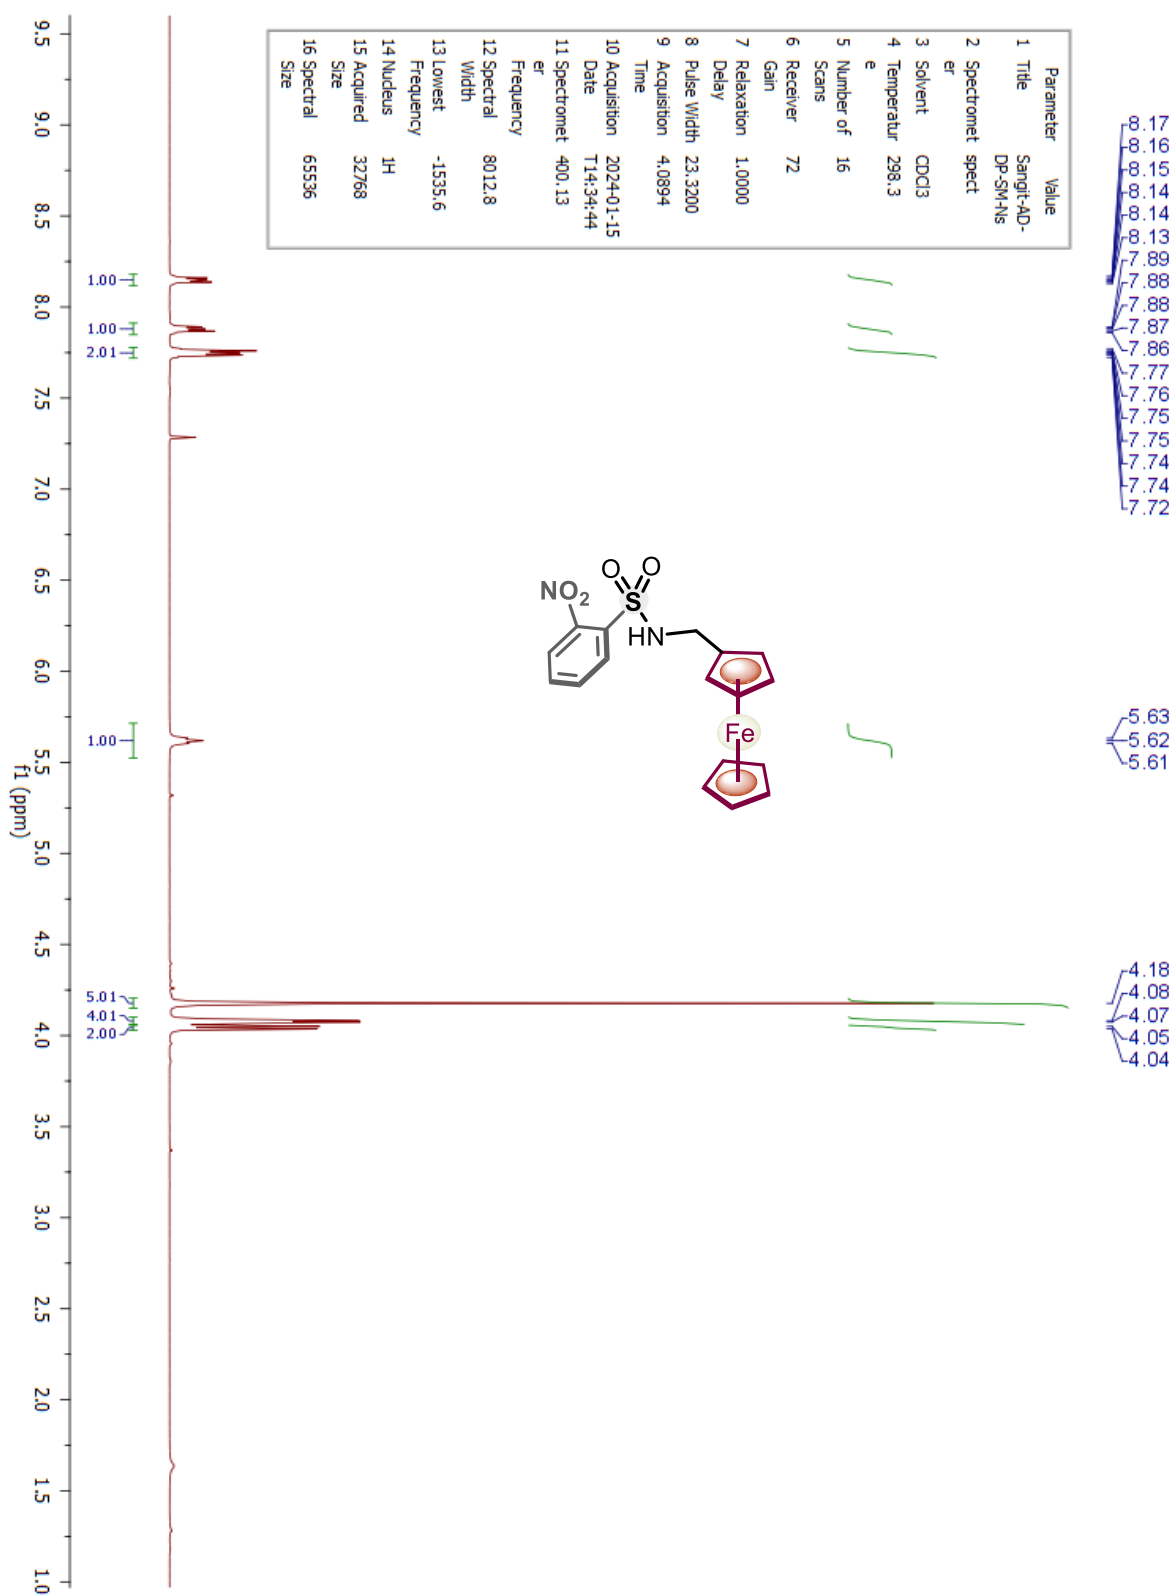

# $^{13}\text{C}\{^1\text{H}\}$ NMR Spectrum of **1e**

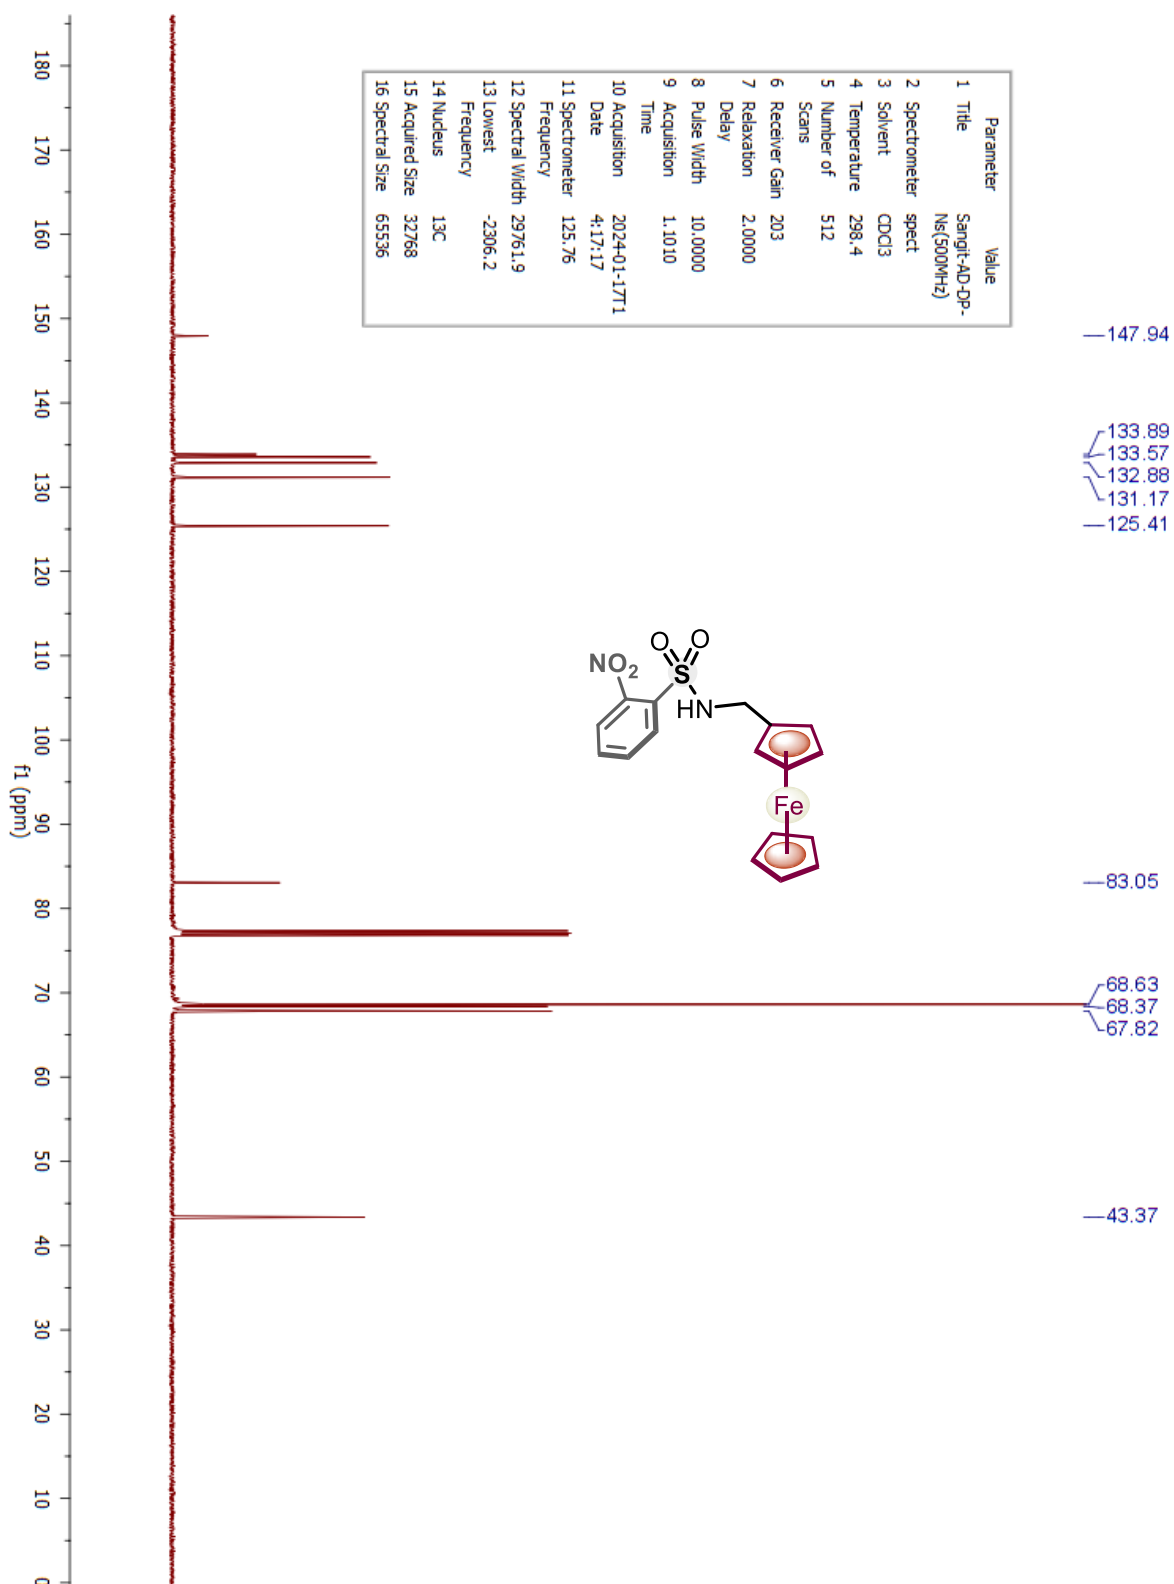

| Parameter                 | Value                      |
|---------------------------|----------------------------|
| 1 Title                   | Samgt-AD-GP-<br>Ns(500MHz) |
| 2 Spectrometer            | spect                      |
| 3 Solvent                 | CDCl3                      |
| 4 Temperature             | 298.4                      |
| 5 Number of Scans         | 512                        |
| 6 Receiver Gain           | 203                        |
| 7 Relaxation Delay        | 2.0000                     |
| 8 Pulse Width             | 10.0000                    |
| 9 Acquisition Time        | 1.1010                     |
| 10 Acquisition Date       | 2024-01-17T1<br>4:17:17    |
| 11 Spectrometer Frequency | 125.76                     |
| 12 Spectral Width         | 29761.9                    |
| 13 Lowest Frequency       | -2306.2                    |
| 14 Nucleus                | $^{13}\text{C}$            |
| 15 Acquired Size          | 32768                      |
| 16 Spectral Size          | 65536                      |

<sup>1</sup>H NMR Spectrum of **1f**

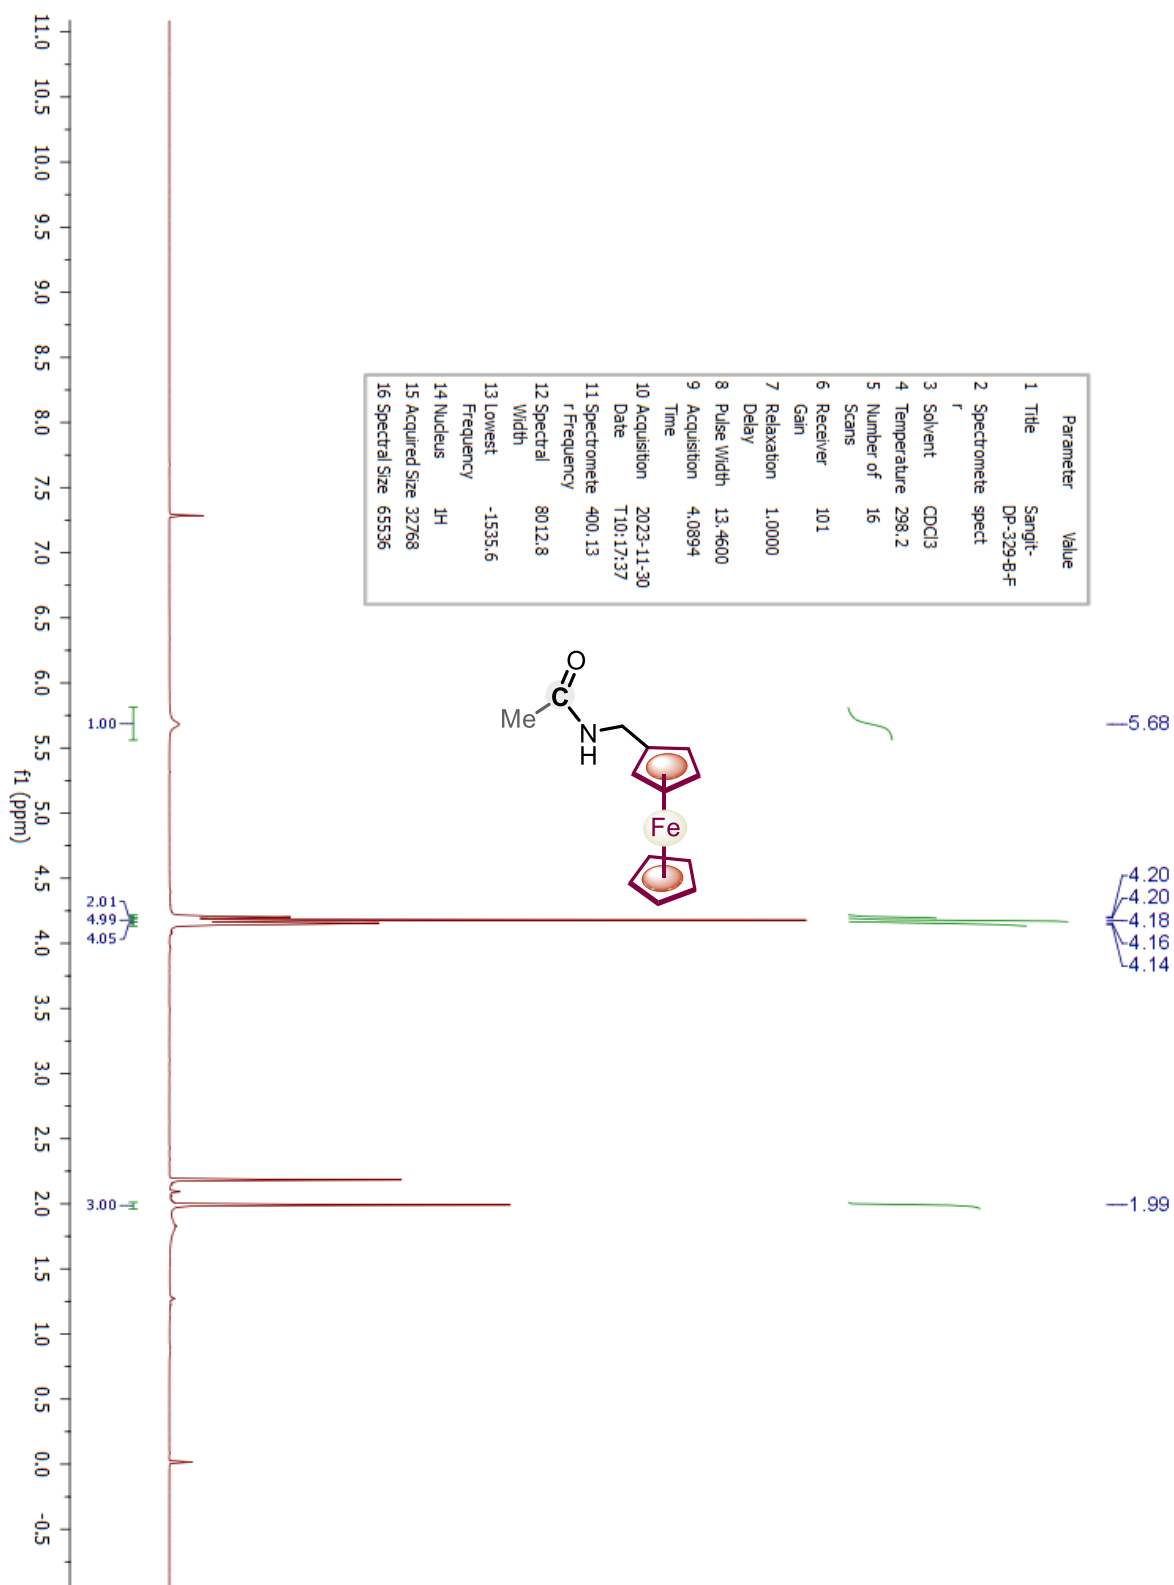

# $^{13}\text{C}\{^1\text{H}\}$ NMR Spectrum of **1f**

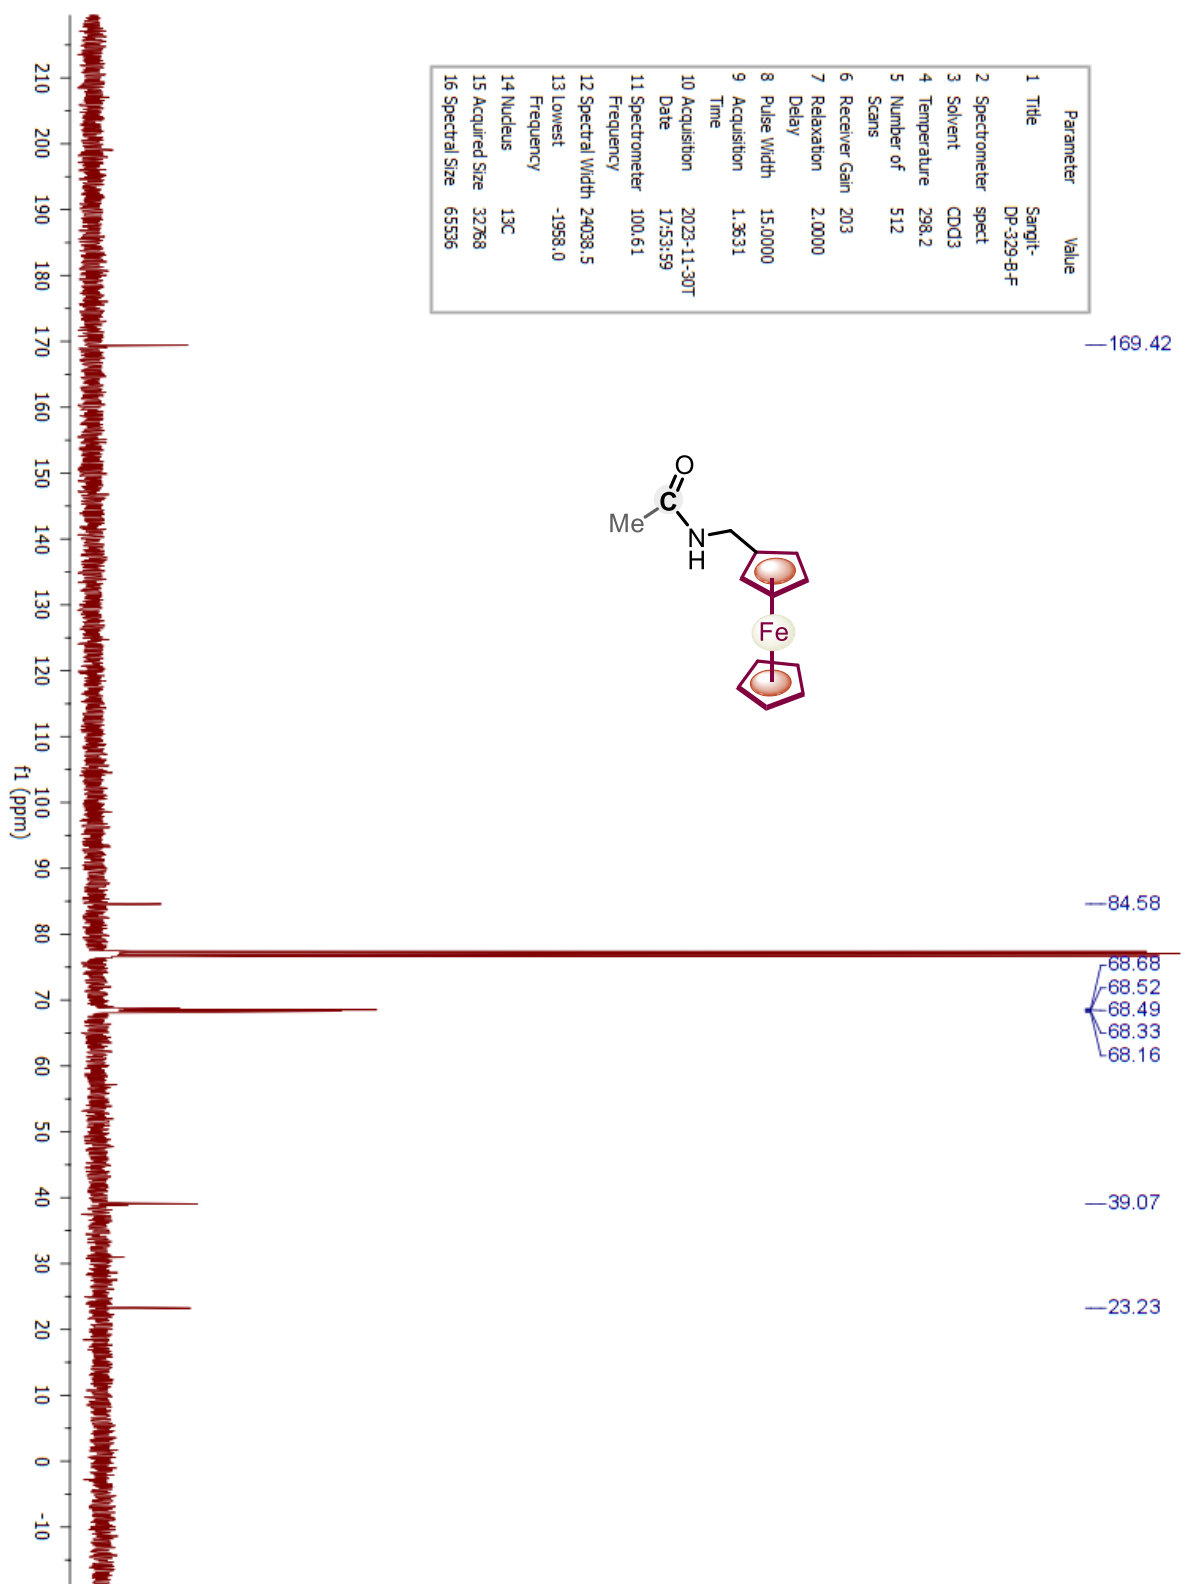

<sup>1</sup>H NMR Spectrum of **3a**

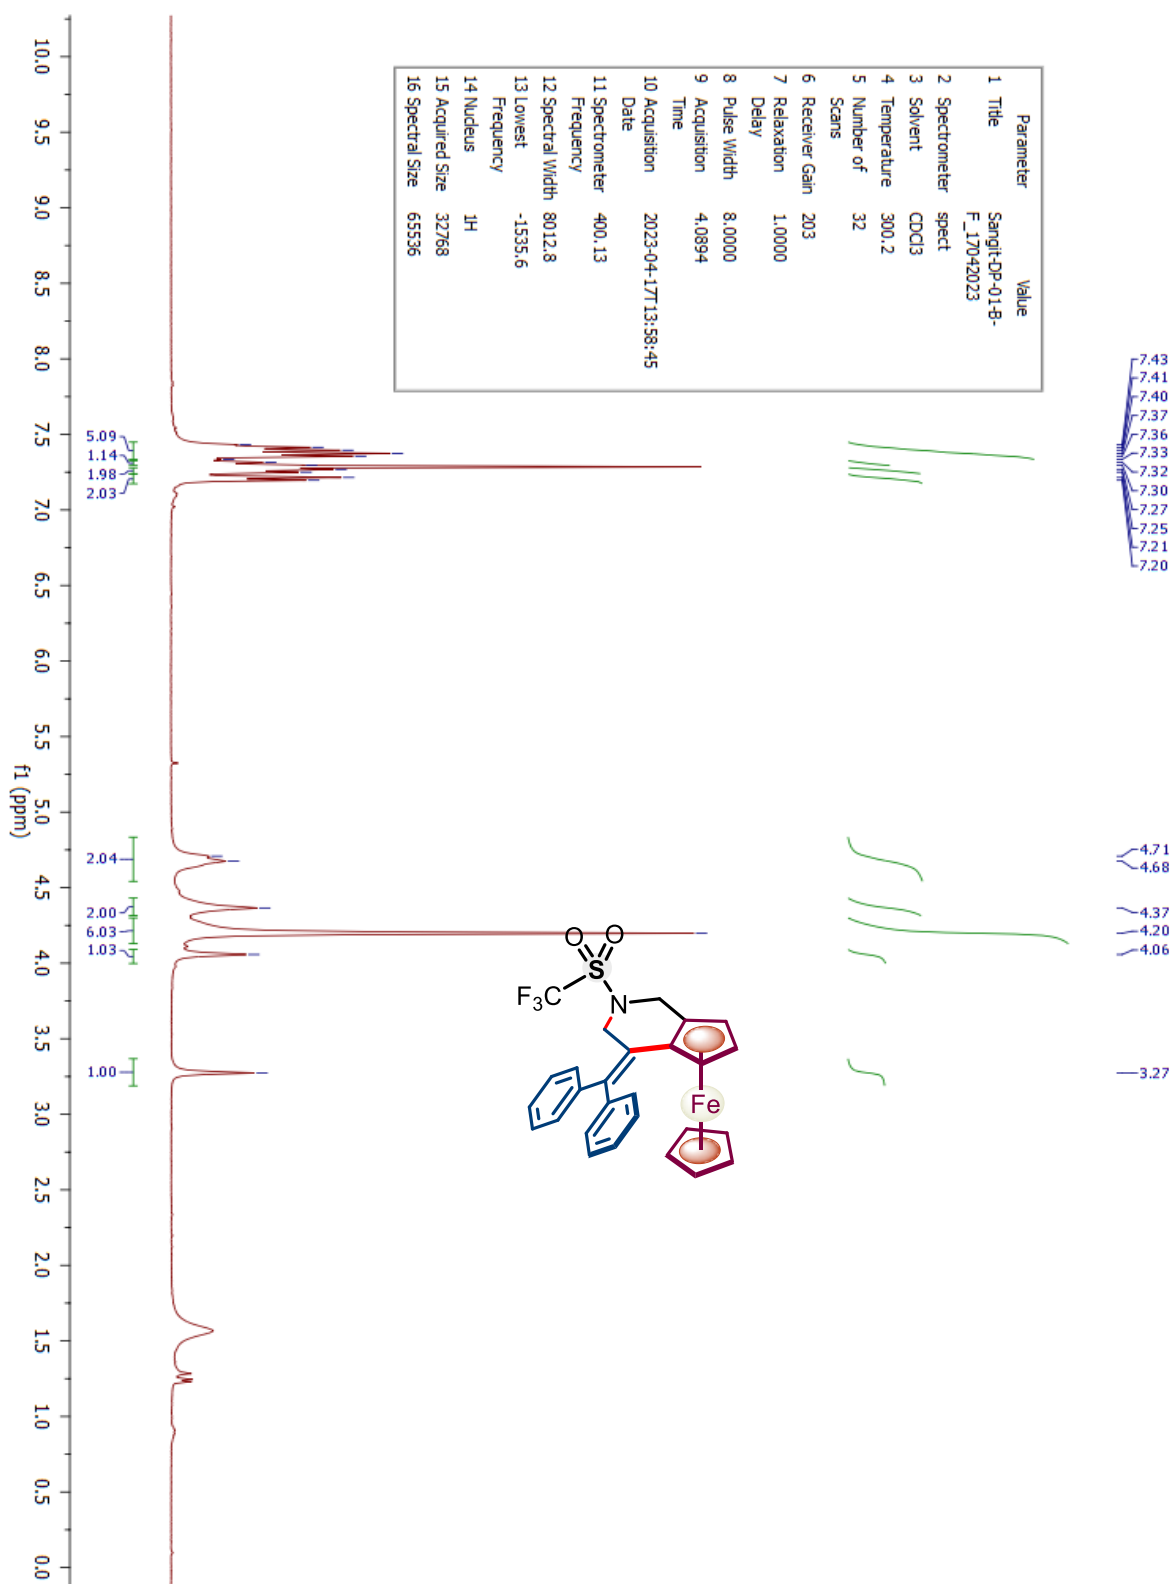

$^{13}\text{C}\{^1\text{H}\}$  NMR Spectrum of **3a**

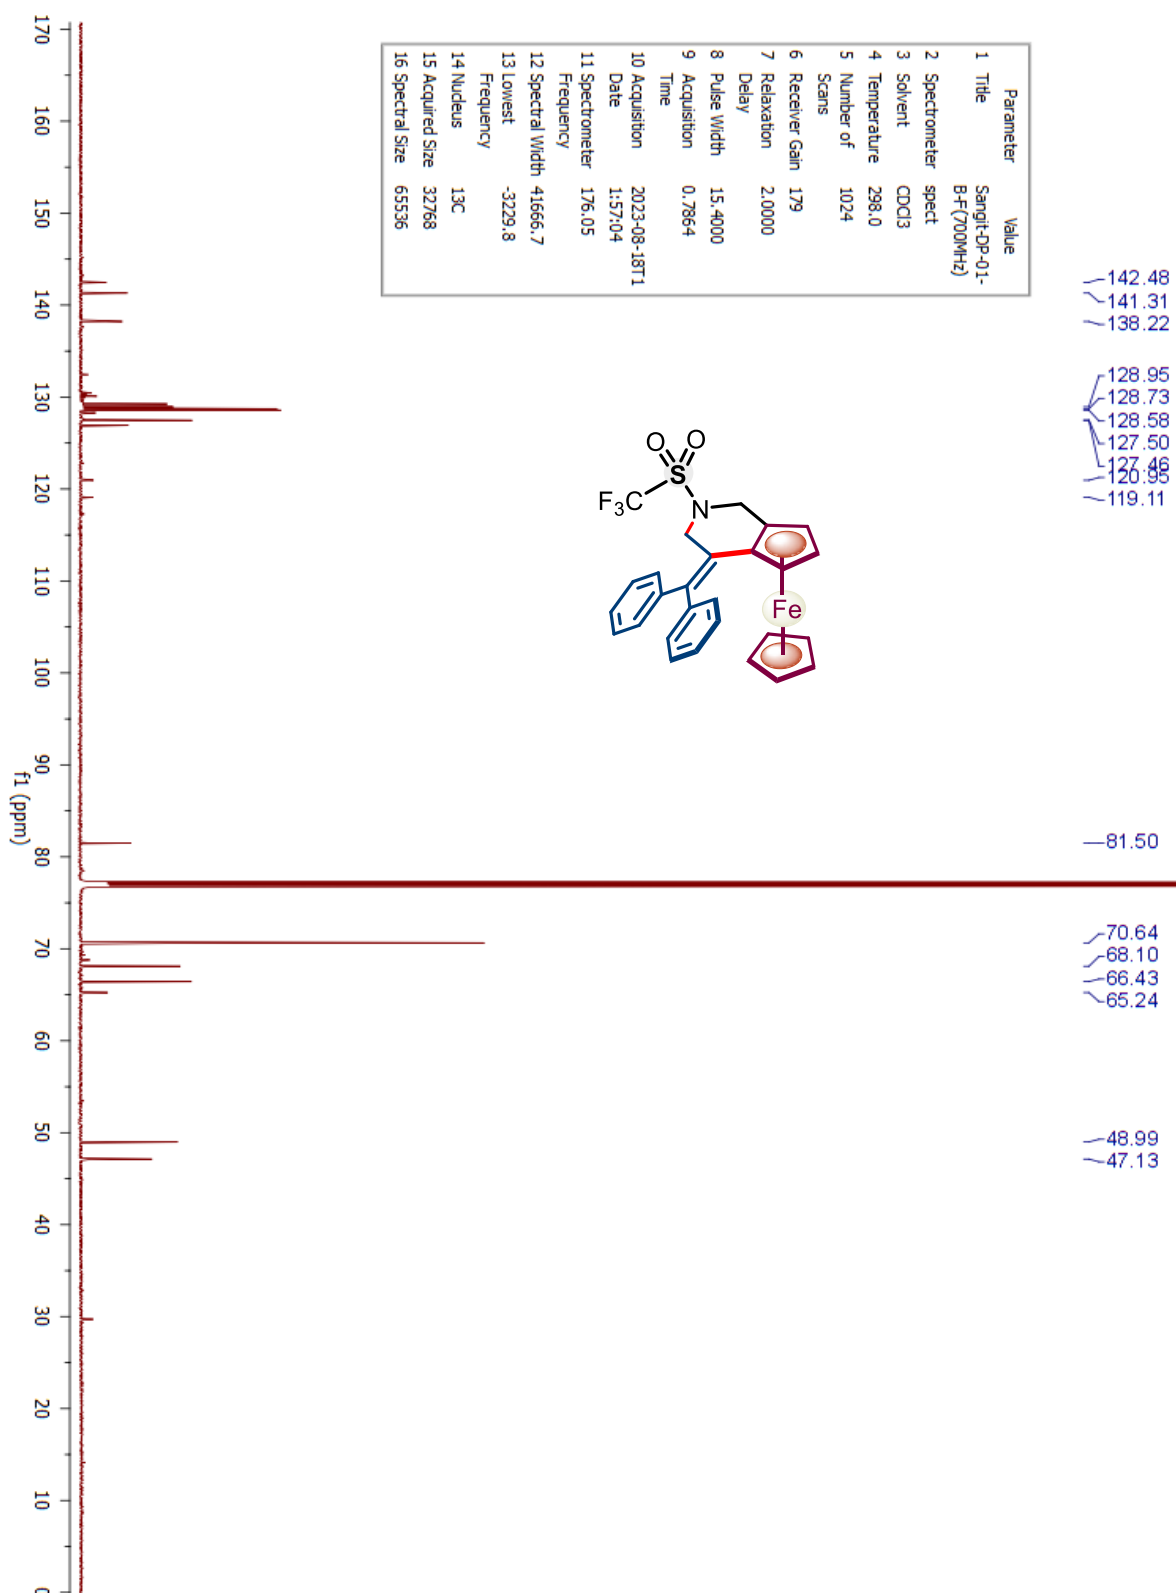



# <sup>19</sup>F NMR Spectrum of **3a**

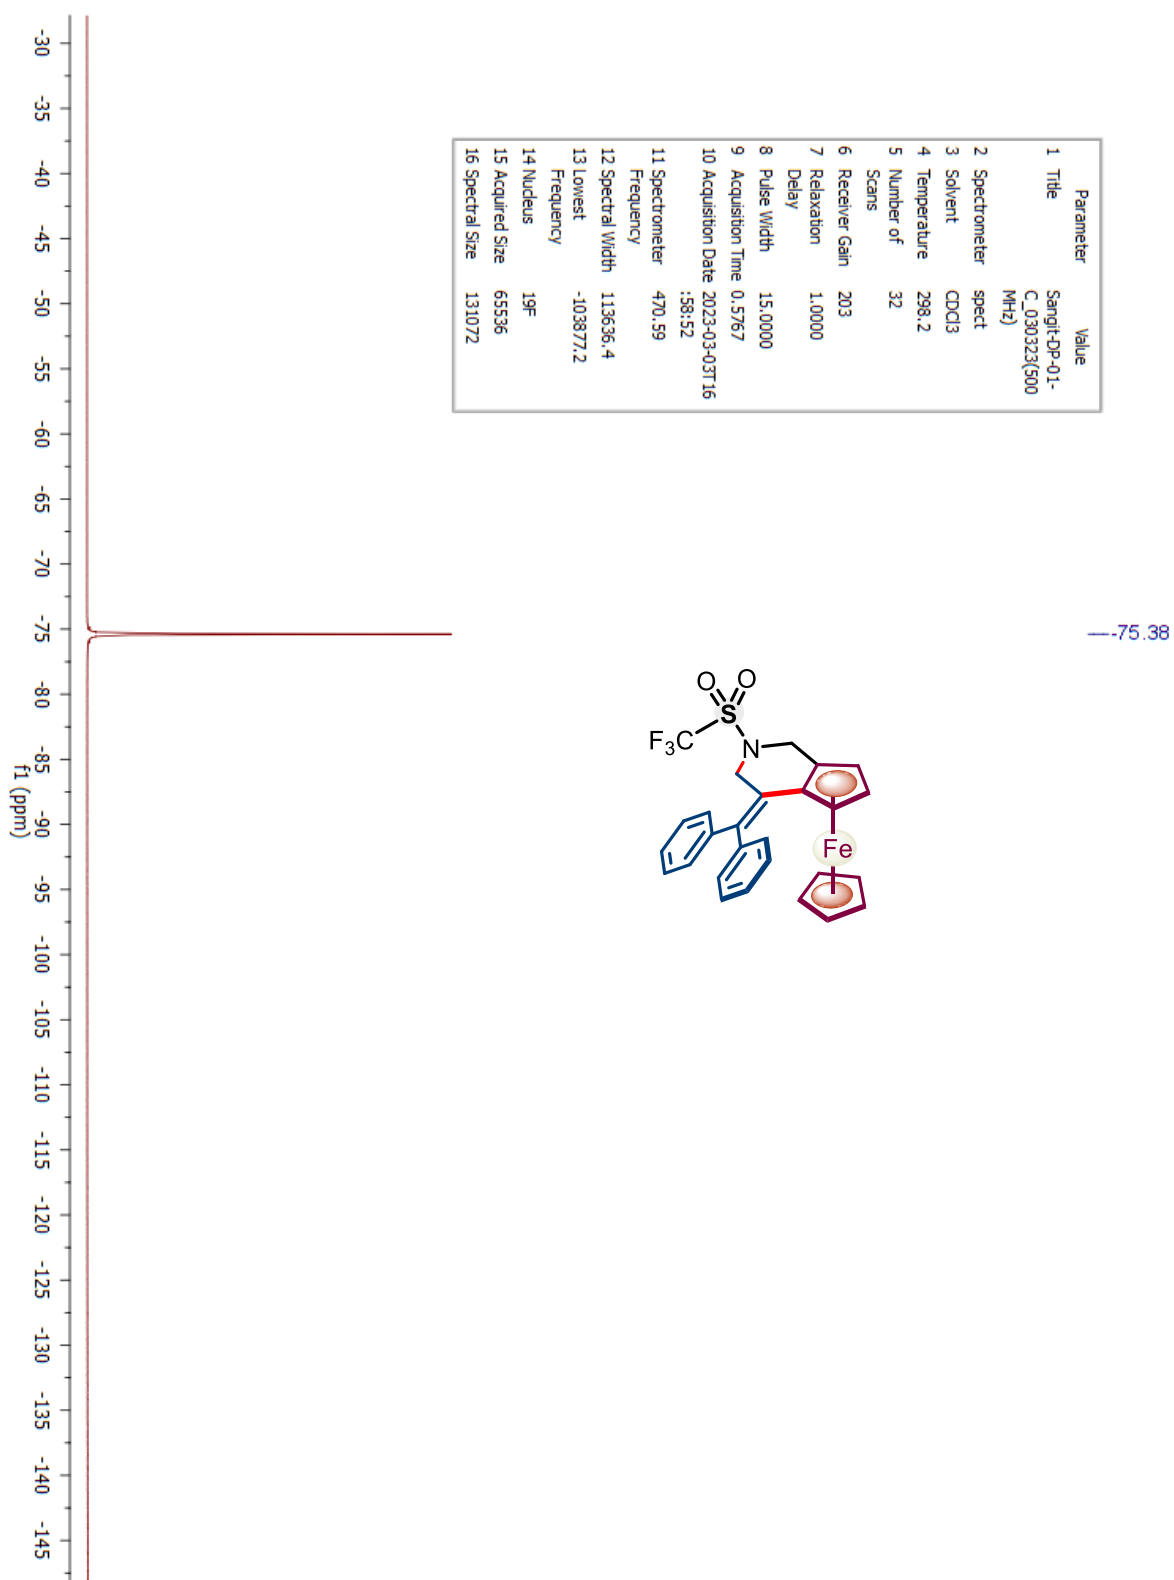

| Parameter                 | Value                          |
|---------------------------|--------------------------------|
| 1 Title                   | Sample-DP-01-C_030323(500 MHz) |
| 2 Spectrometer            | spect                          |
| 3 Solvent                 | CDCl3                          |
| 4 Temperature             | 298.2                          |
| 5 Number of Scans         | 32                             |
| 6 Receiver Gain           | 203                            |
| 7 Relaxation Delay        | 1.0000                         |
| 8 Pulse Width             | 15.0000                        |
| 9 Acquisition Time        | 0.5767                         |
| 10 Acquisition Date       | 2023-03-03T16:58:52            |
| 11 Spectrometer Frequency | 470.59                         |
| 12 Spectral Width         | 113636.4                       |
| 13 Lowest Frequency       | -103877.2                      |
| 14 Nucleus                | <sup>19</sup> F                |
| 15 Acquired Size          | 65536                          |
| 16 Spectral Size          | 131072                         |

<sup>1</sup>H NMR Spectrum of **3b**

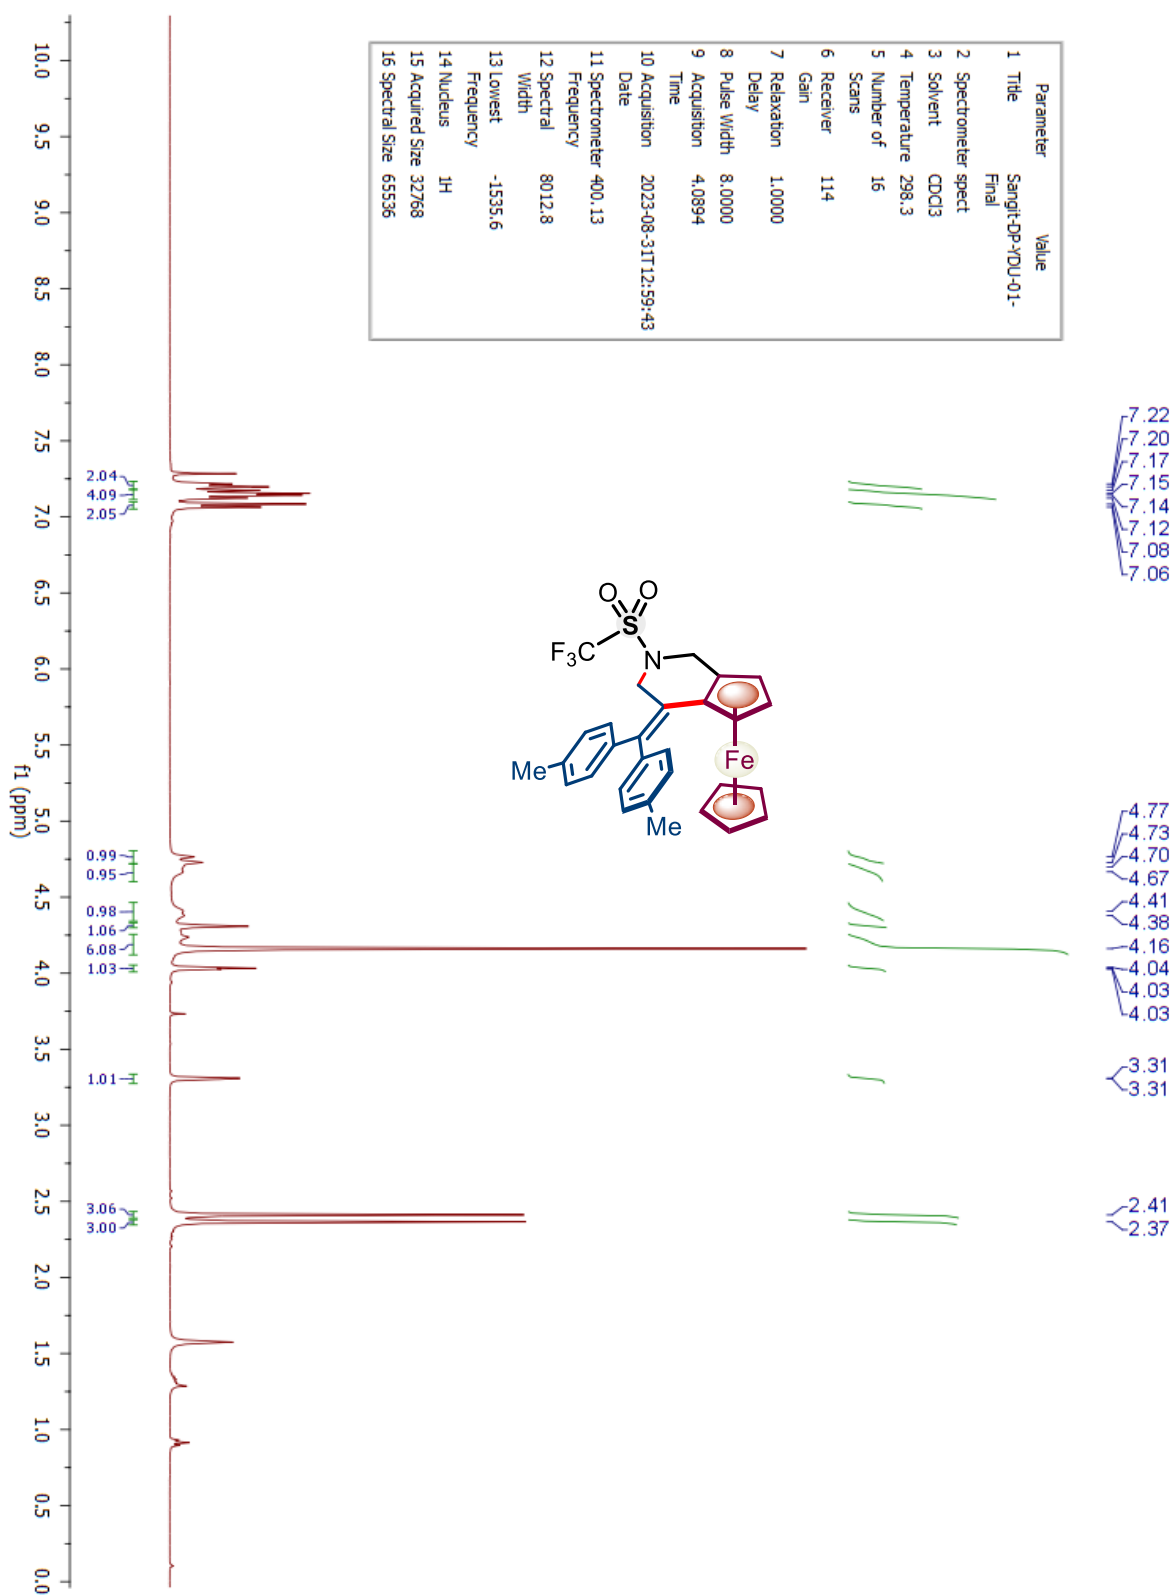

| Parameter            | Value                  |
|----------------------|------------------------|
| 1 Title              | Sangji-DP-YDU-01-Final |
| 2 Spectrometer spect |                        |
| 3 Solvent            | CDCl3                  |
| 4 Temperature        | 298.3                  |
| 5 Number of Scans    | 16                     |
| 6 Receiver Gain      | 114                    |
| 7 Relaxation Delay   | 1.0000                 |
| 8 Pulse Width        | 8.0000                 |
| 9 Acquisition Time   | 4.0894                 |
| 10 Acquisition Date  | 2023-08-31T12:59:43    |
| 11 Spectrometer      | 400.13                 |
| 12 Spectral Width    | 8012.8                 |
| 13 Lowest Frequency  | -1535.6                |
| 14 Nucleus           | <sup>1</sup> H         |
| 15 Acquired Size     | 32768                  |
| 16 Spectral Size     | 65536                  |

# $^{13}\text{C}\{^1\text{H}\}$ NMR Spectrum of **3b**

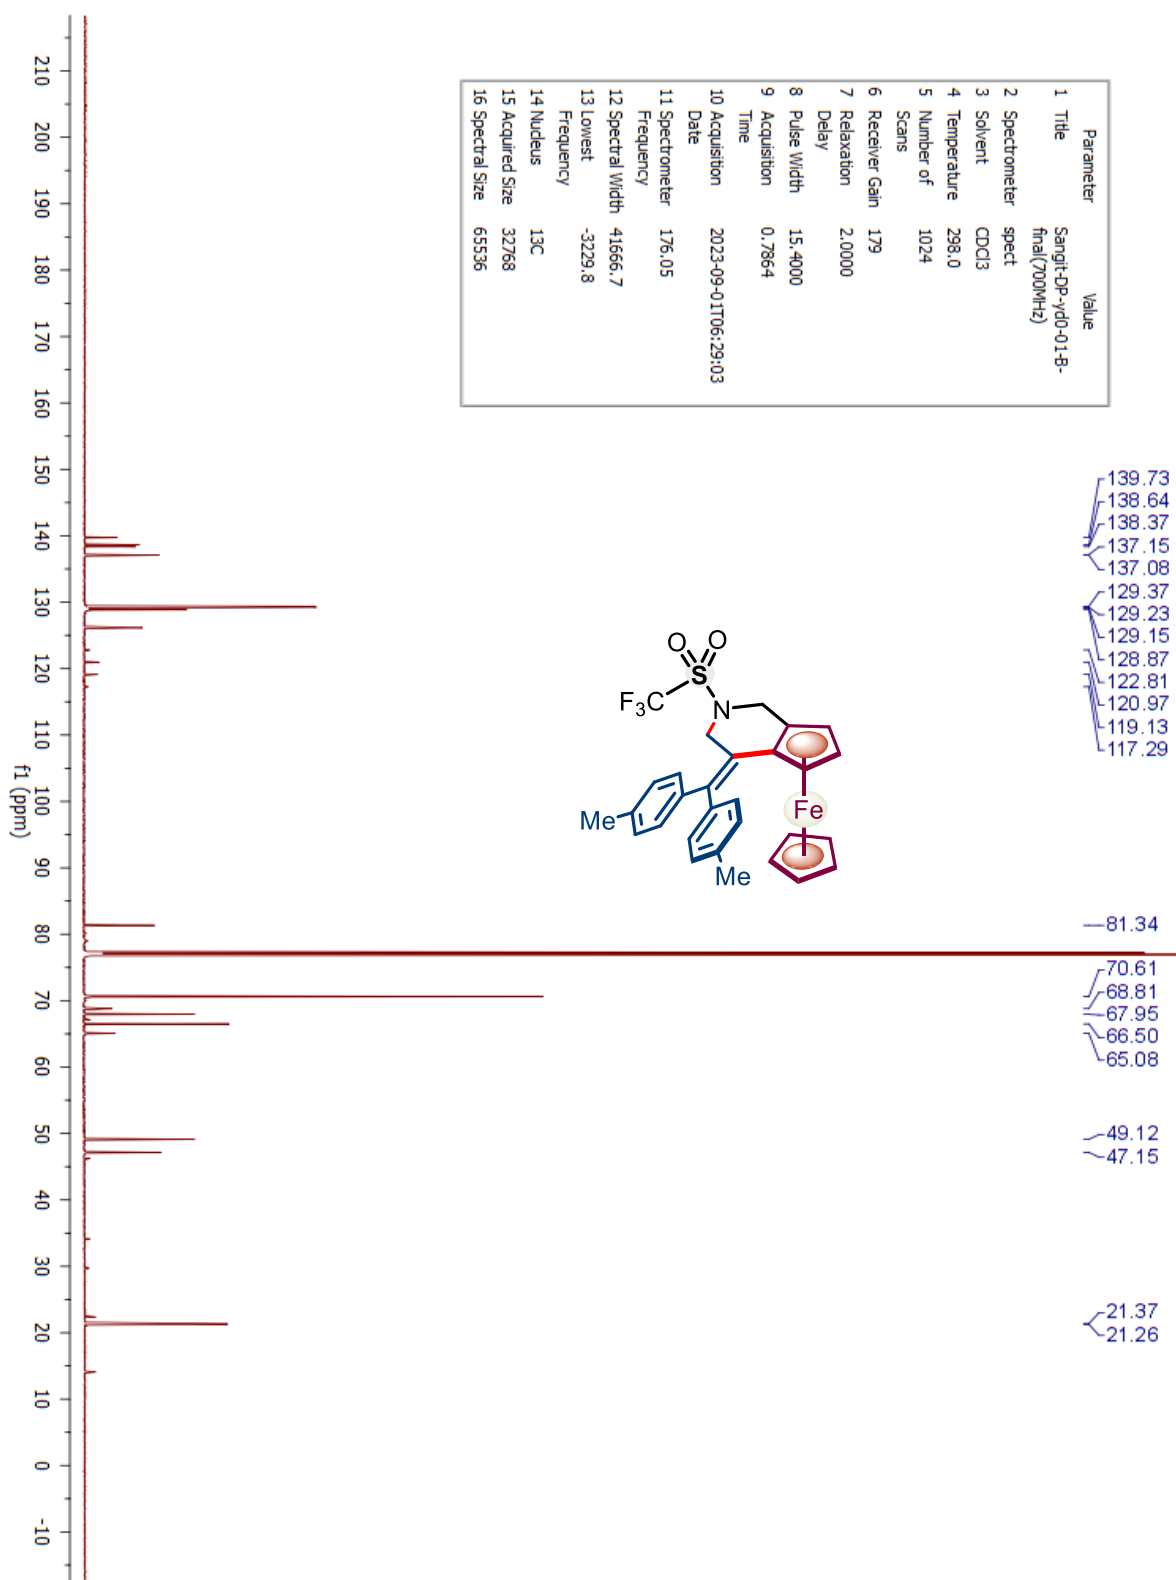

# <sup>19</sup>F NMR Spectrum of **3b**

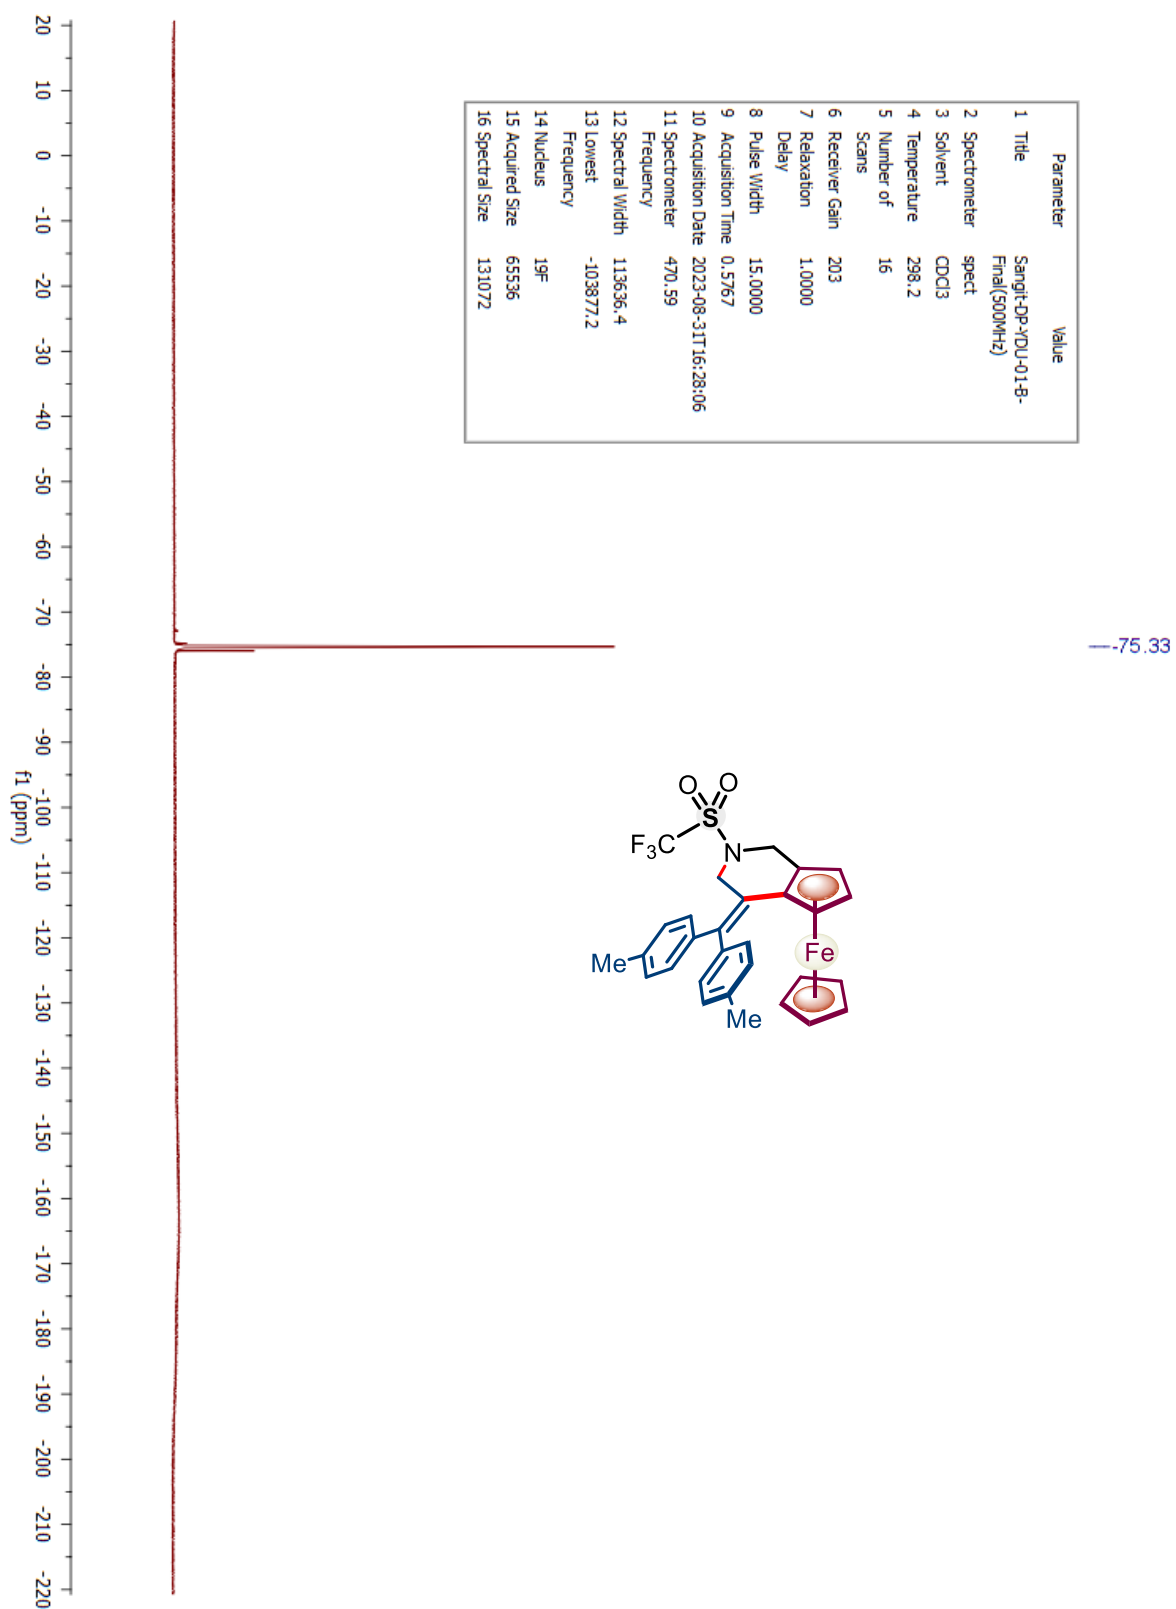

# <sup>1</sup>H NMR Spectrum of 3c

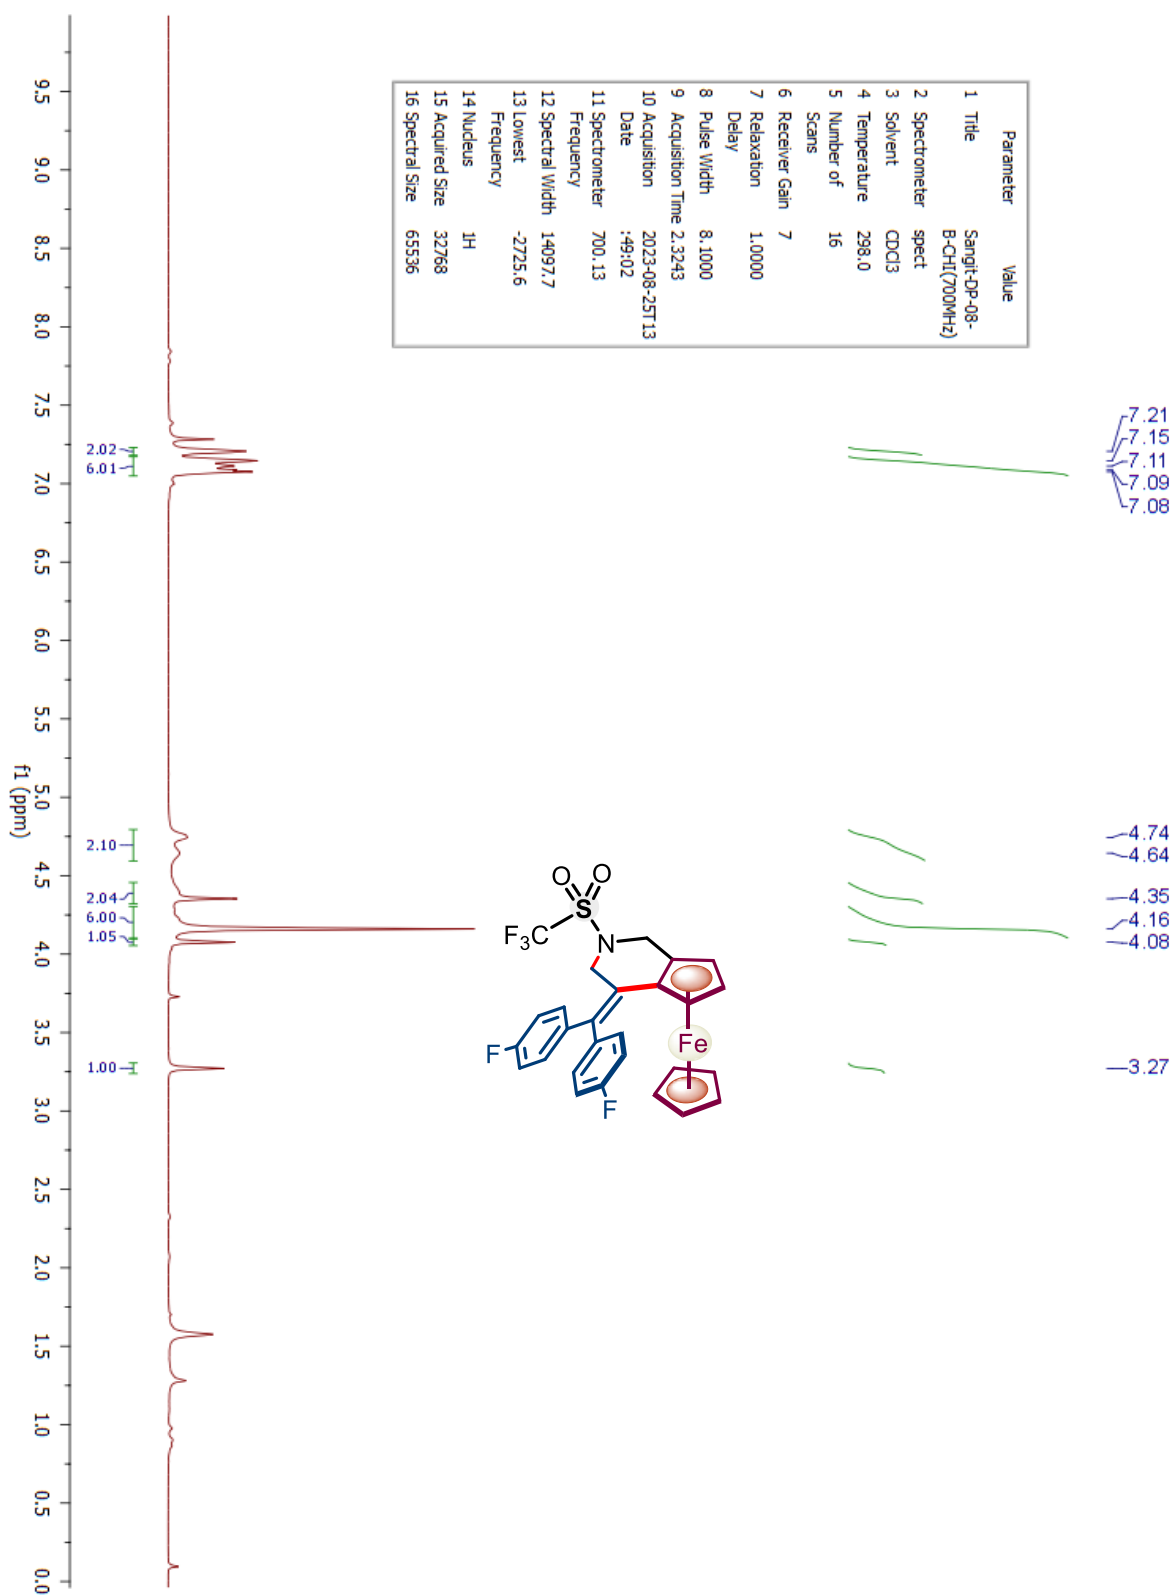

$^{13}\text{C}\{^1\text{H}\}$  NMR Spectrum of **3c**

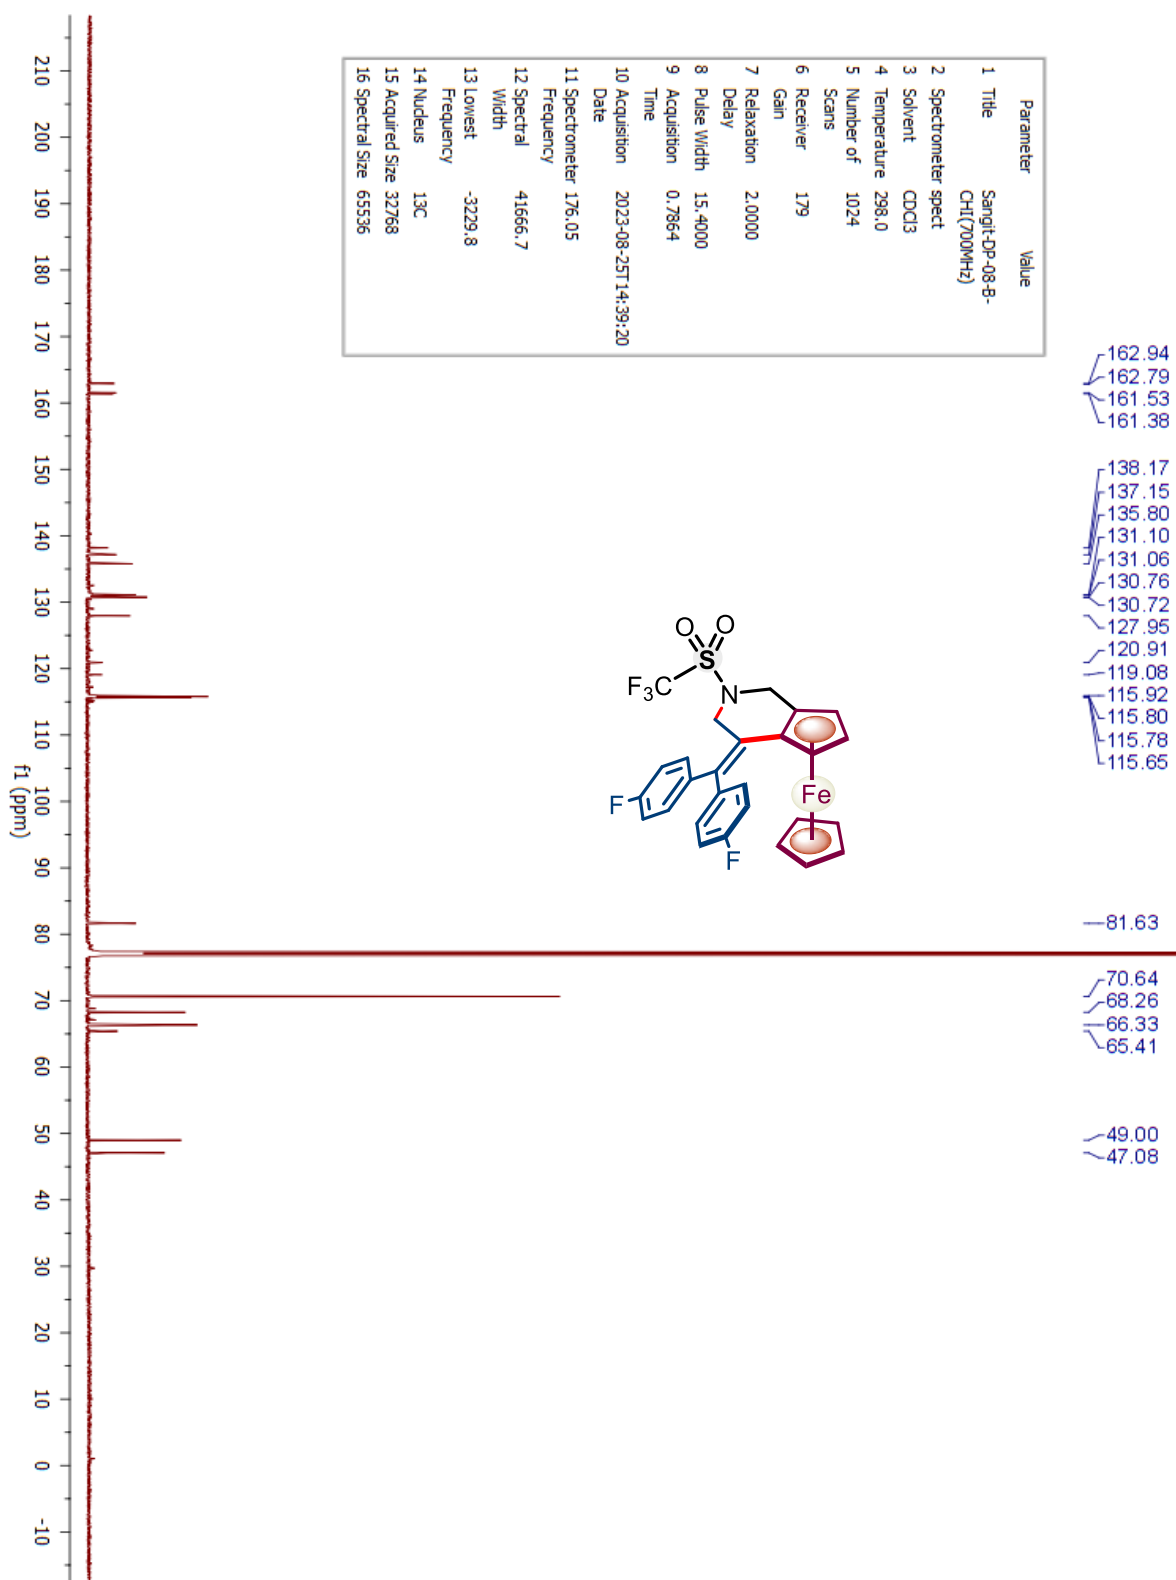

# <sup>19</sup>F NMR Spectrum of **3c**

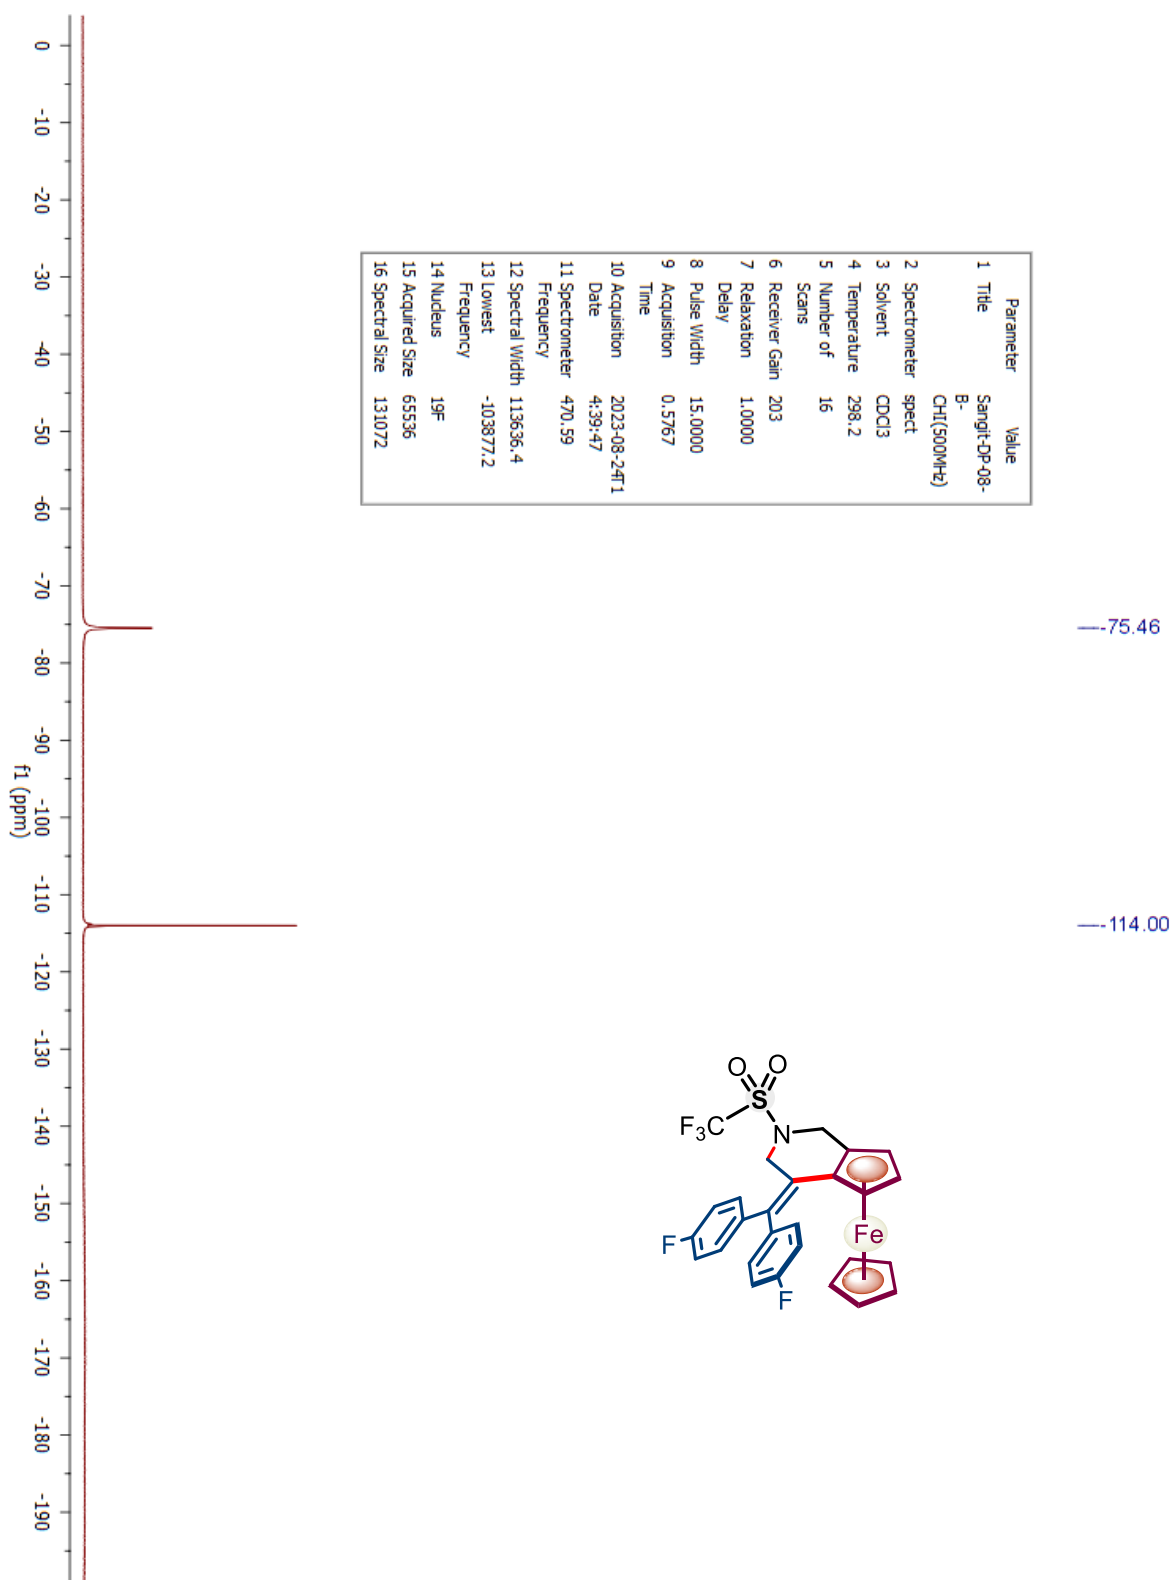

| Parameter                 | Value                      |
|---------------------------|----------------------------|
| 1 Title                   | Sangit-DP-Q8-B-CH1(500MHz) |
| 2 Spectrometer            | spect                      |
| 3 Solvent                 | CDCl3                      |
| 4 Temperature             | 298.2                      |
| 5 Number of Scans         | 16                         |
| 6 Receiver Gain           | 203                        |
| 7 Relaxation Delay        | 1.0000                     |
| 8 Pulse Width             | 15.0000                    |
| 9 Acquisition Time        | 0.5767                     |
| 10 Acquisition Date       | 2023-08-24T14:39:47        |
| 11 Spectrometer Frequency | 470.59                     |
| 12 Spectral Width         | 113636.4                   |
| 13 Lowest Frequency       | -103877.2                  |
| 14 Nucleus                | <sup>19</sup> F            |
| 15 Acquired Size          | 65536                      |
| 16 Spectral Size          | 131072                     |

# <sup>1</sup>H NMR Spectrum of 3d

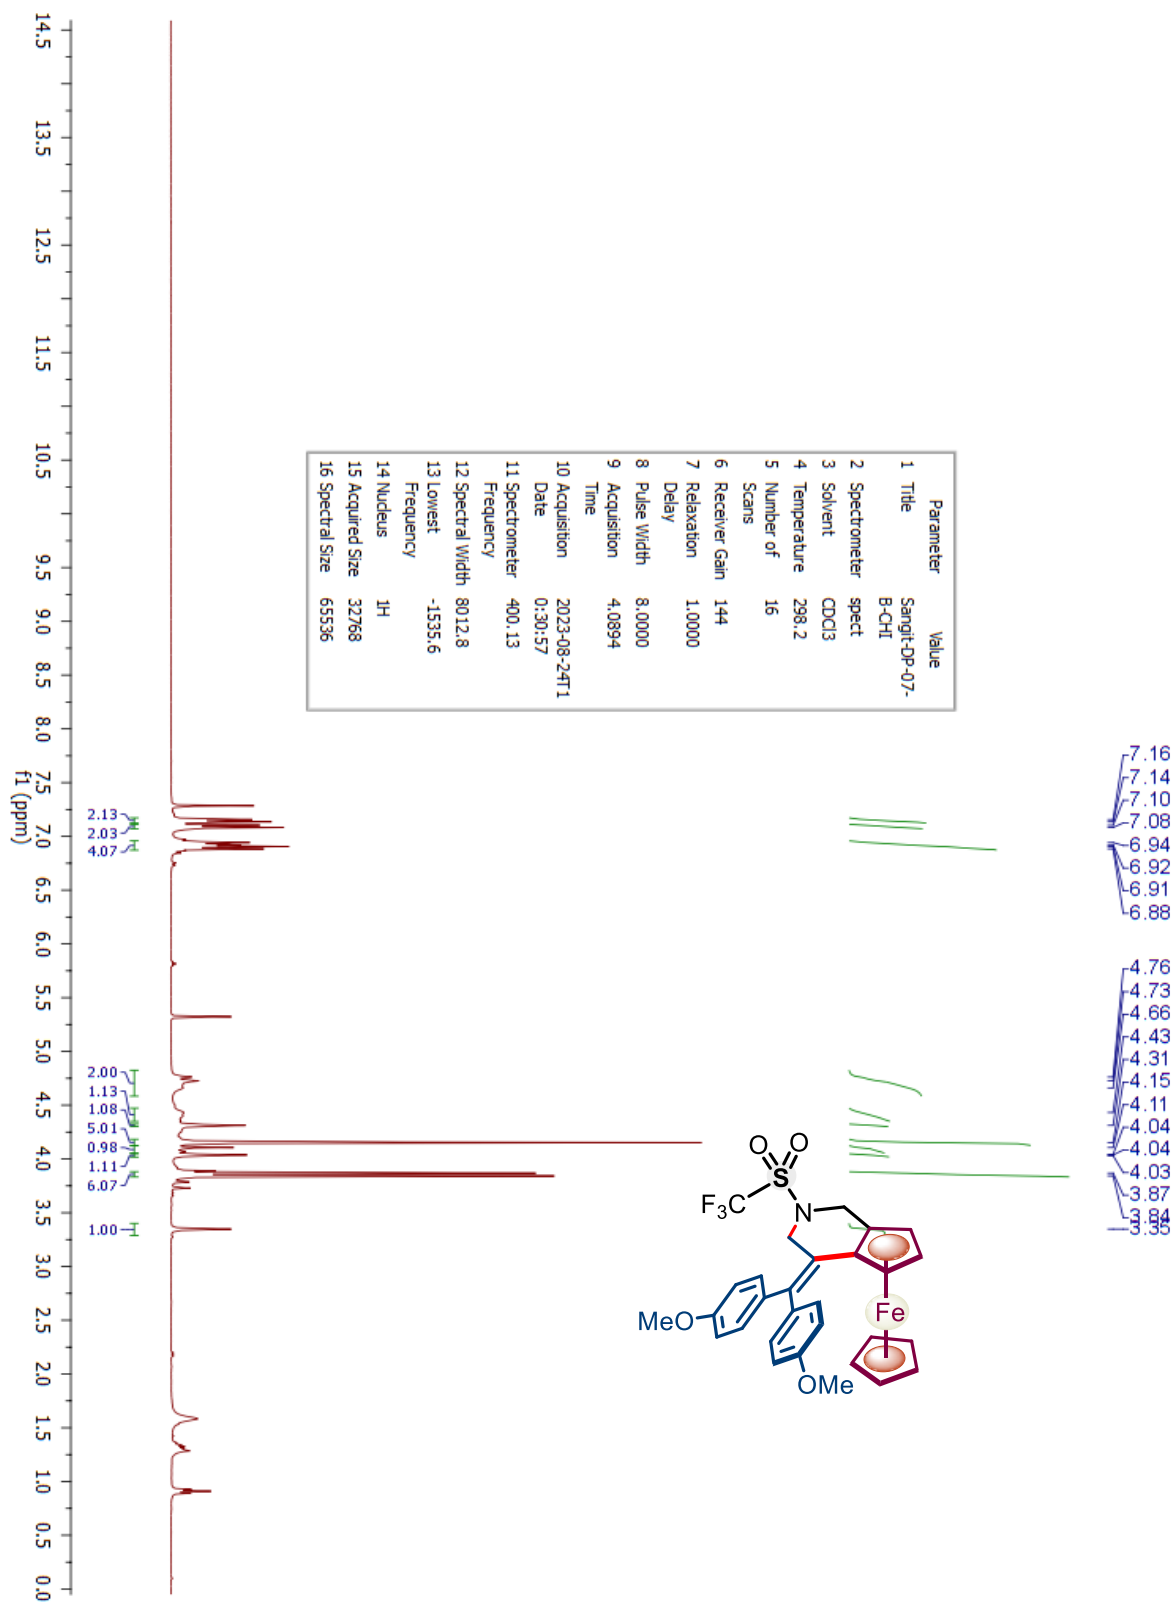



# $^{13}\text{C}\{^1\text{H}\}$ NMR Spectrum of **3d**

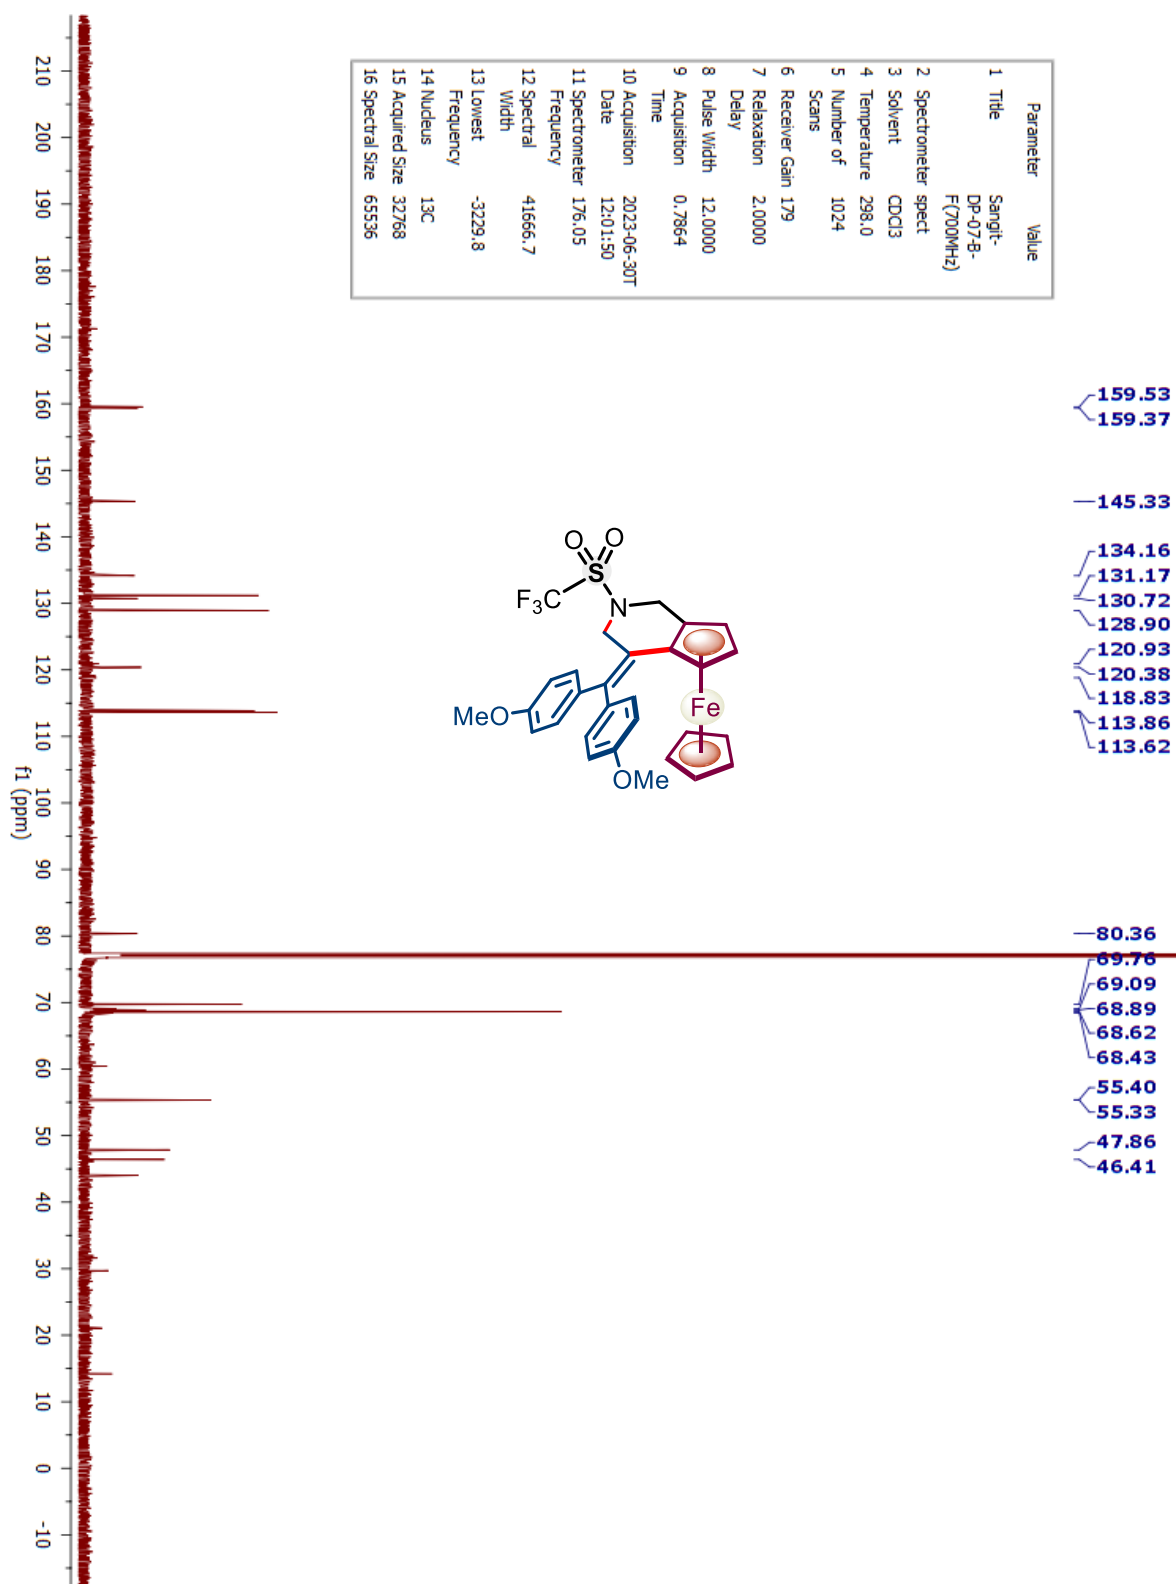

# <sup>19</sup>F NMR Spectrum of **3d**

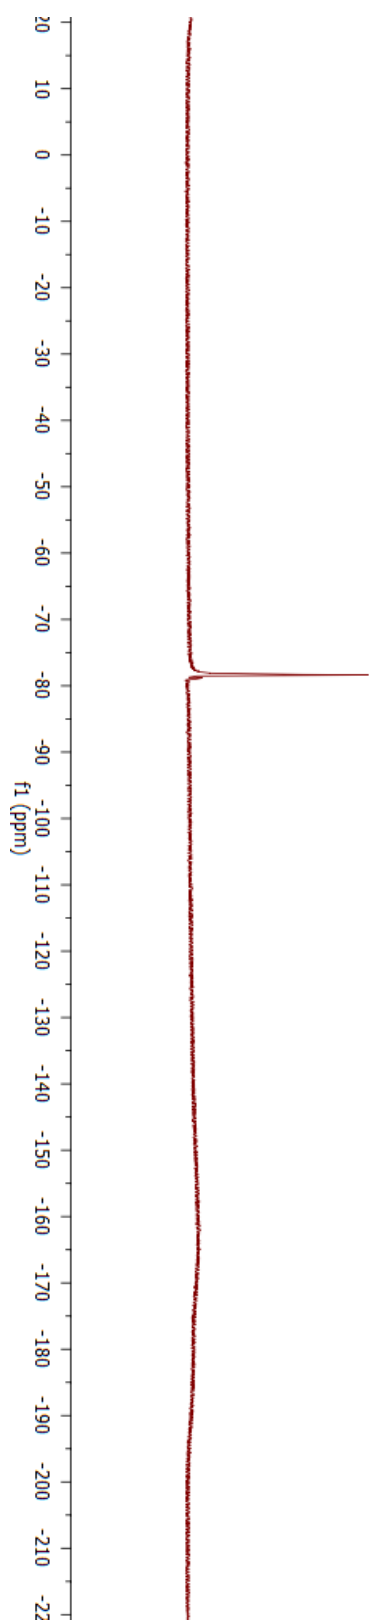

| Parameter                 | Value                    |
|---------------------------|--------------------------|
| 1 Title                   | Sangit-AD-DP-35F(500MHz) |
| 2 Spectrometer            | spect                    |
| 3 Solvent                 | CDCl3                    |
| 4 Temperature             | 298.0                    |
| 5 Number of Scans         | 16                       |
| 6 Receiver Gain           | 203                      |
| 7 Relaxation Delay        | 1.0000                   |
| 8 Pulse Width             | 15.0000                  |
| 9 Acquisition Time        | 0.5767                   |
| 10 Acquisition Date       | 2023-08-31T16:32:24      |
| 11 Spectrometer Frequency | 470.59                   |
| 12 Spectral Width         | 113636.4                 |
| 13 Lowest Frequency       | -103877.2                |
| 14 Nucleus                | <sup>19</sup> F          |
| 15 Acquired Size          | 65536                    |
| 16 Spectral Size          | 131072                   |

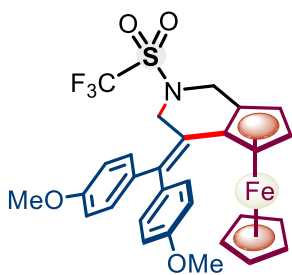

-78.36

<sup>1</sup>H NMR Spectrum of **3e**

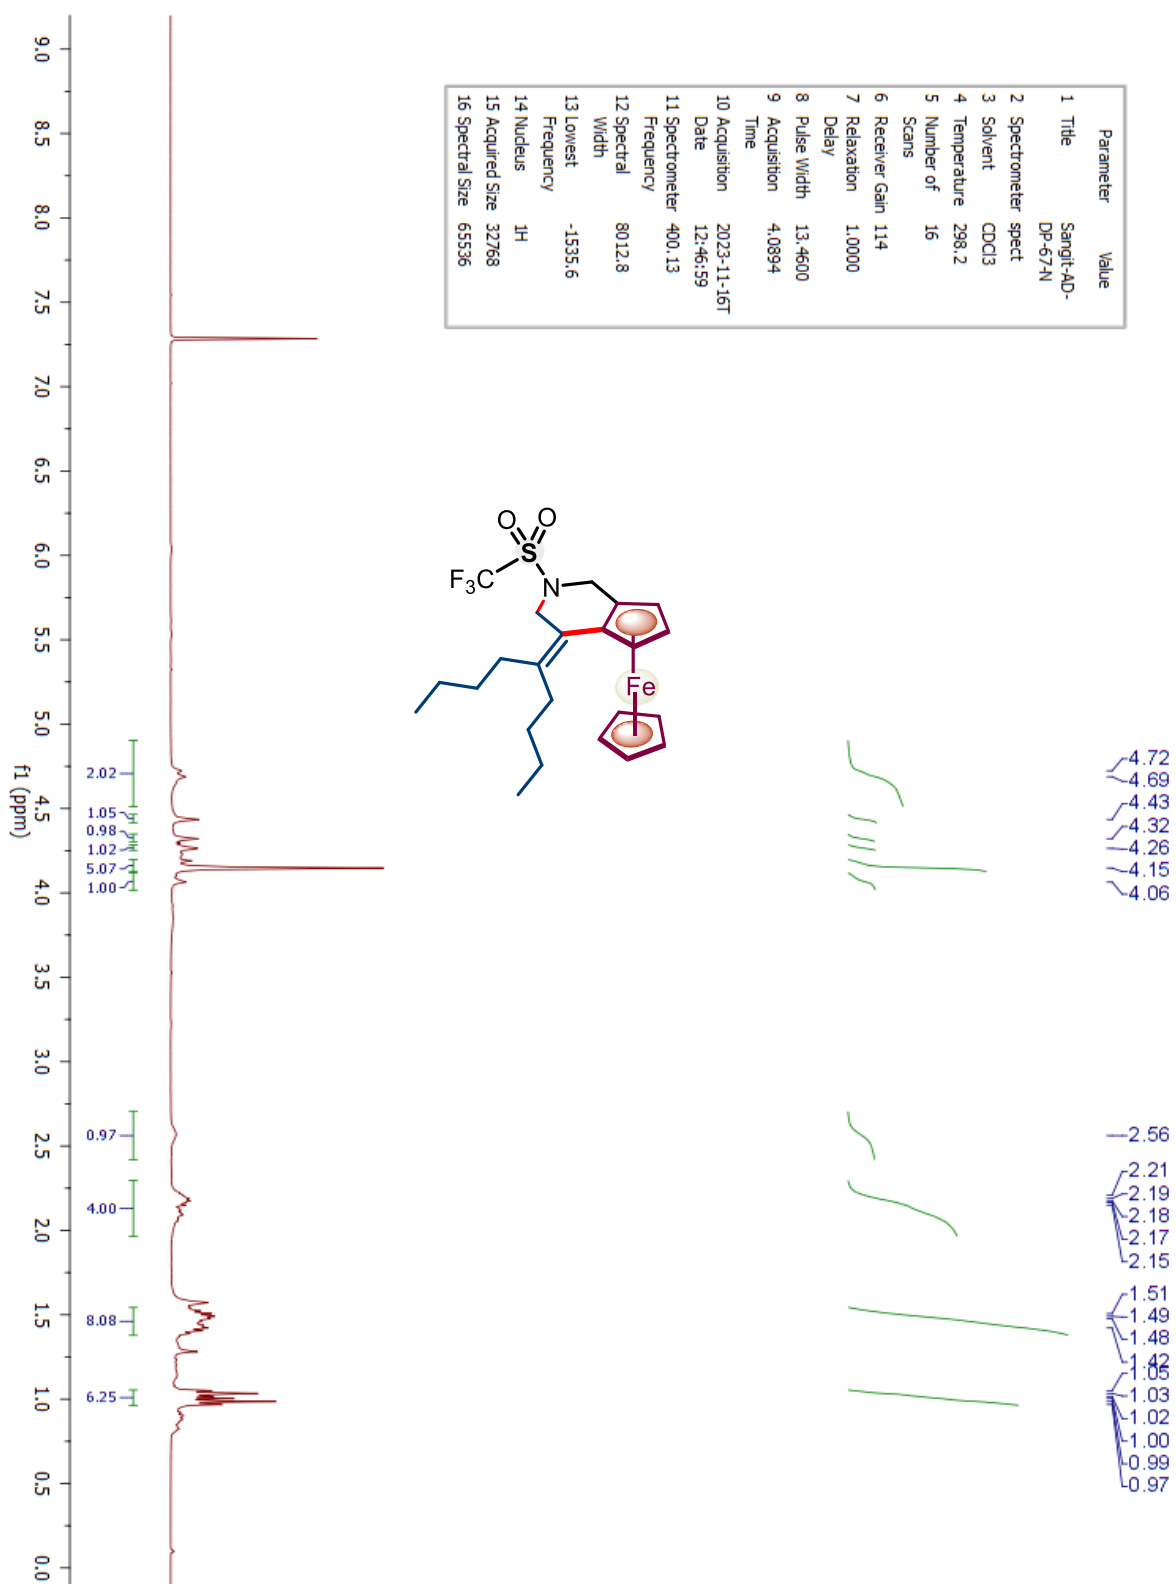

| Parameter                 | Value               |
|---------------------------|---------------------|
| 1 Title                   | Sangit-AD-DP-67-NI  |
| 2 Spectrometer spect      |                     |
| 3 Solvent                 | CDCl3               |
| 4 Temperature             | 298.2               |
| 5 Number of Scans         | 16                  |
| 6 Receiver Gain           | 114                 |
| 7 Relaxation Delay        | 1.0000              |
| 8 Pulse Width             | 13.4600             |
| 9 Acquisition Time        | 4.0894              |
| 10 Acquisition Date       | 2023-11-16T12:46:59 |
| 11 Spectrometer Frequency | 400.13              |
| 12 Spectral Width         | 8012.8              |
| 13 Lowest Frequency       | -1535.6             |
| 14 Nucleus                | <sup>1</sup> H      |
| 15 Acquired Size          | 32768               |
| 16 Spectral Size          | 65536               |

# $^{13}\text{C}\{^1\text{H}\}$ NMR Spectrum of **3e**

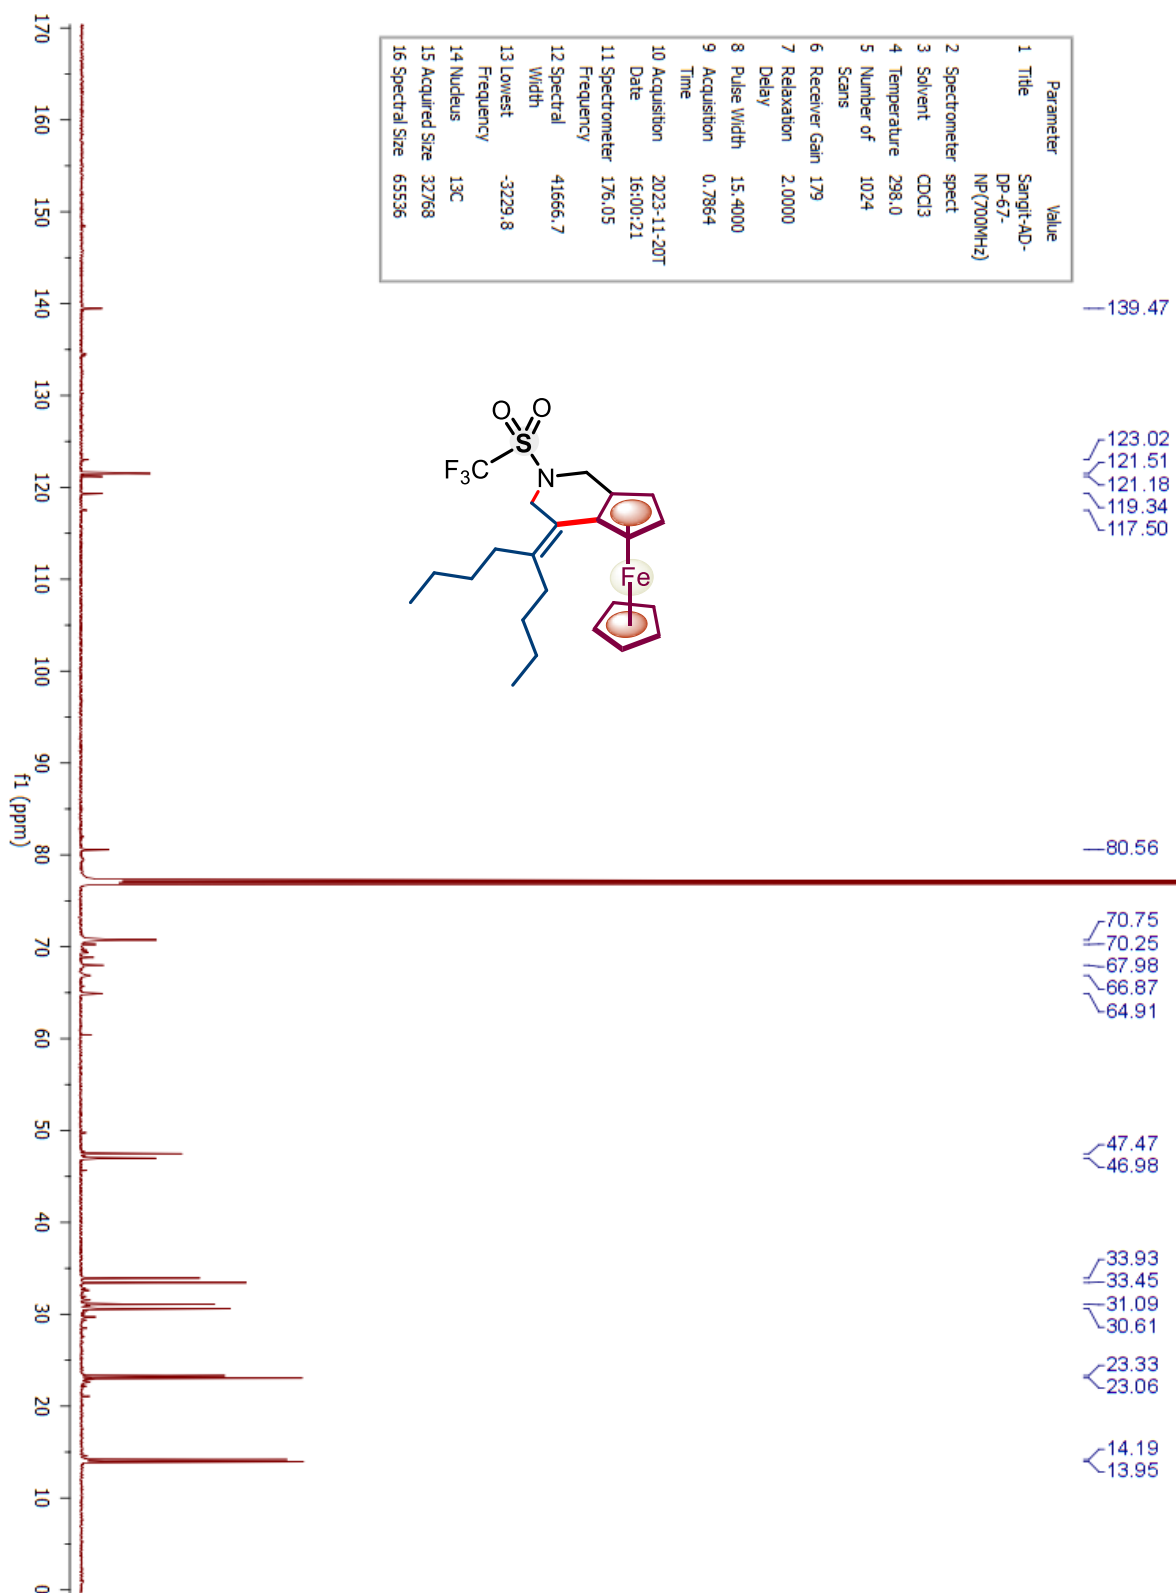

# <sup>19</sup>F NMR Spectrum of **3e**

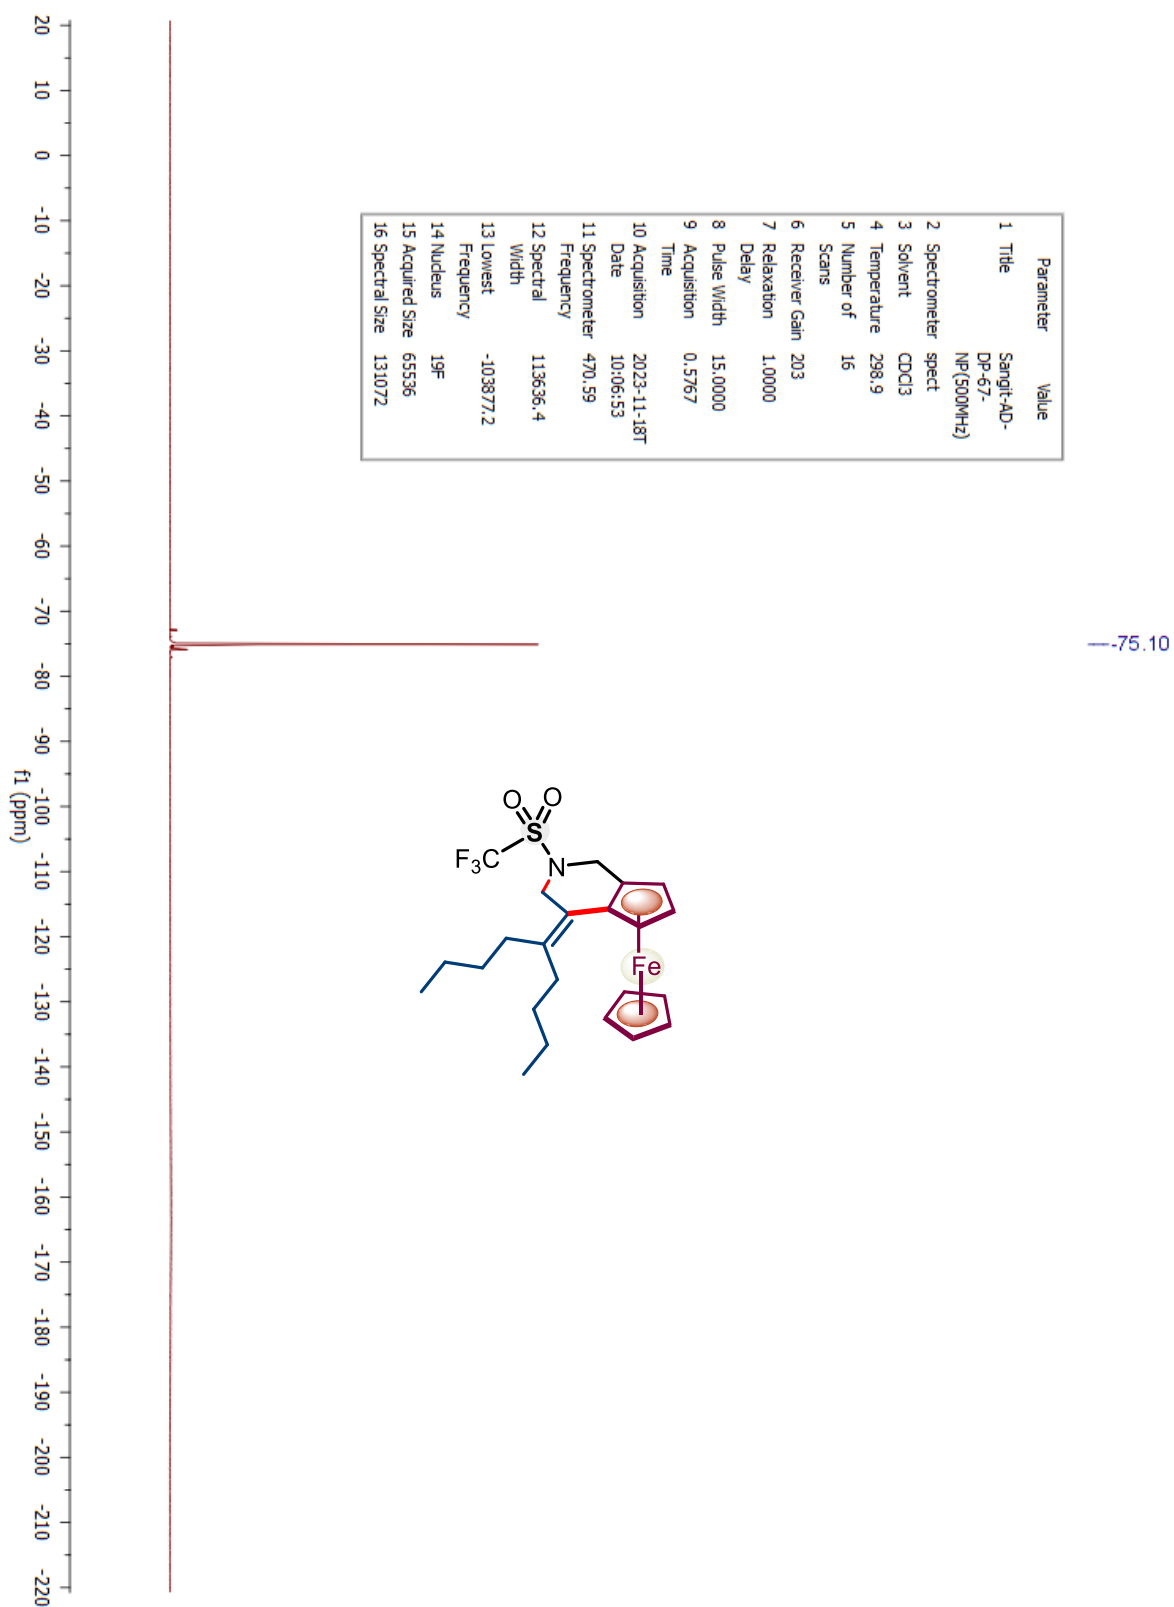

# <sup>1</sup>H NMR Spectrum of **3f**

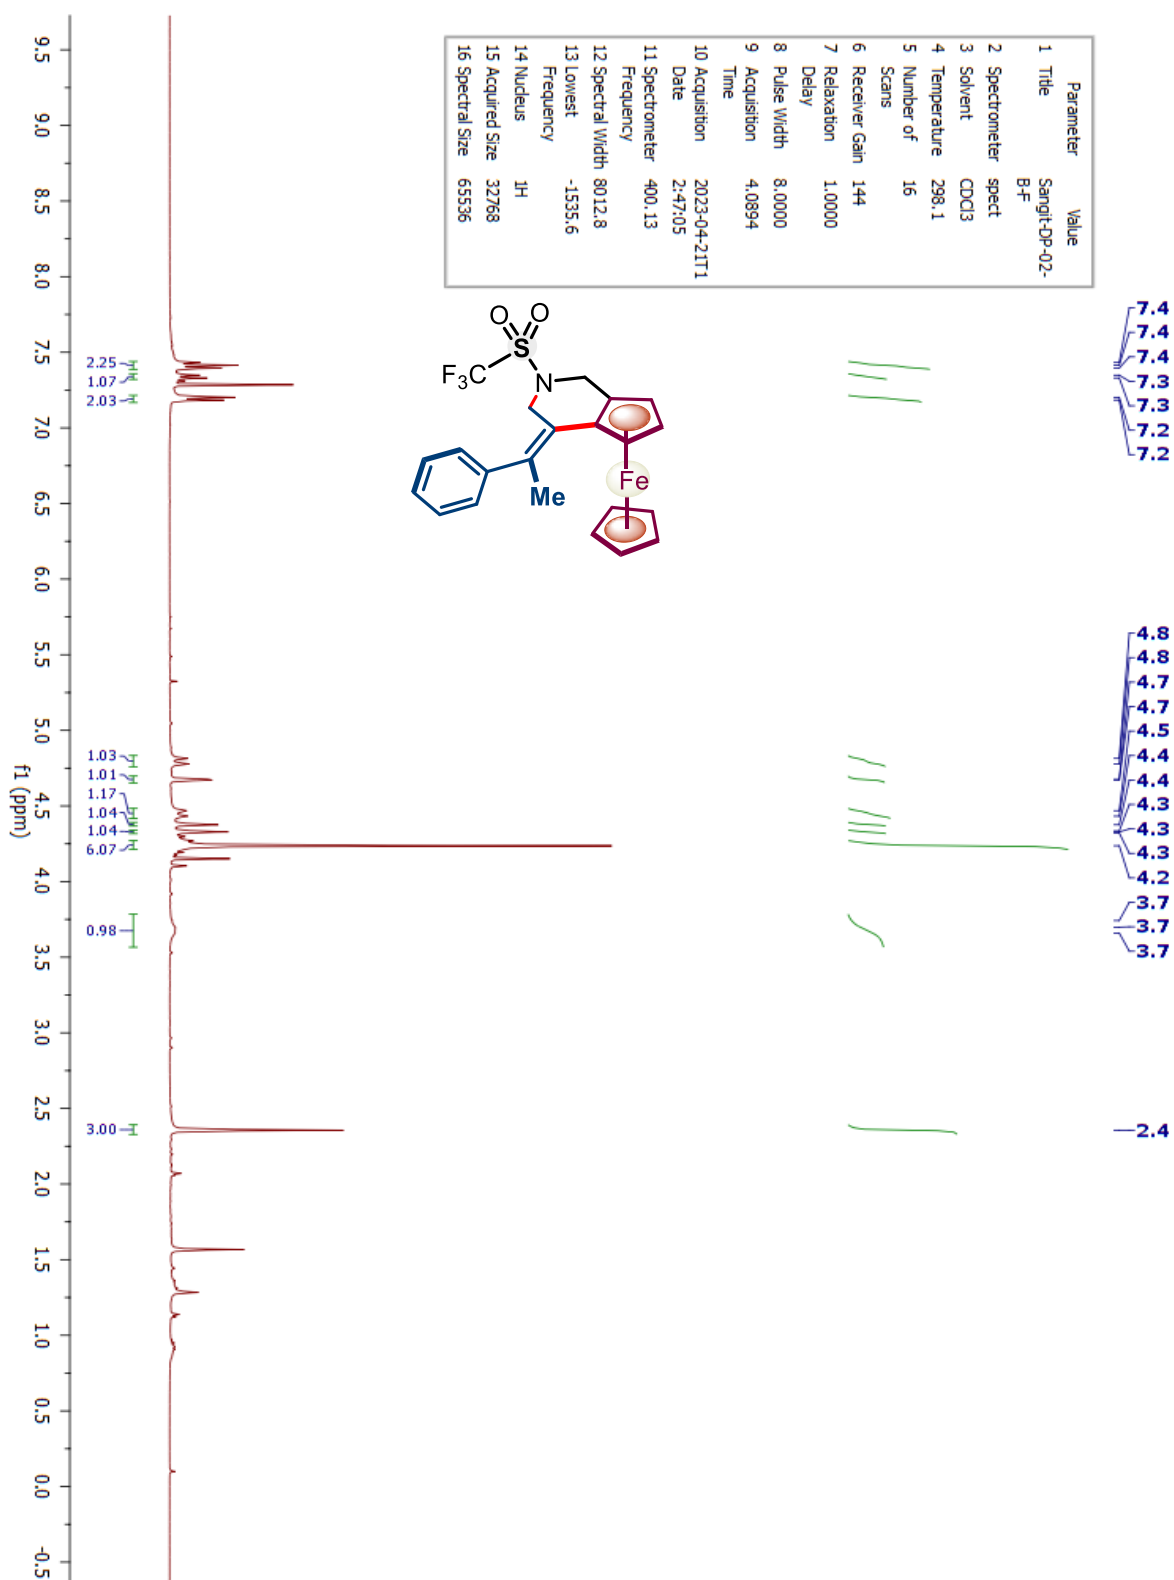

# $^{13}\text{C}\{^1\text{H}\}$ NMR Spectrum of **3f**

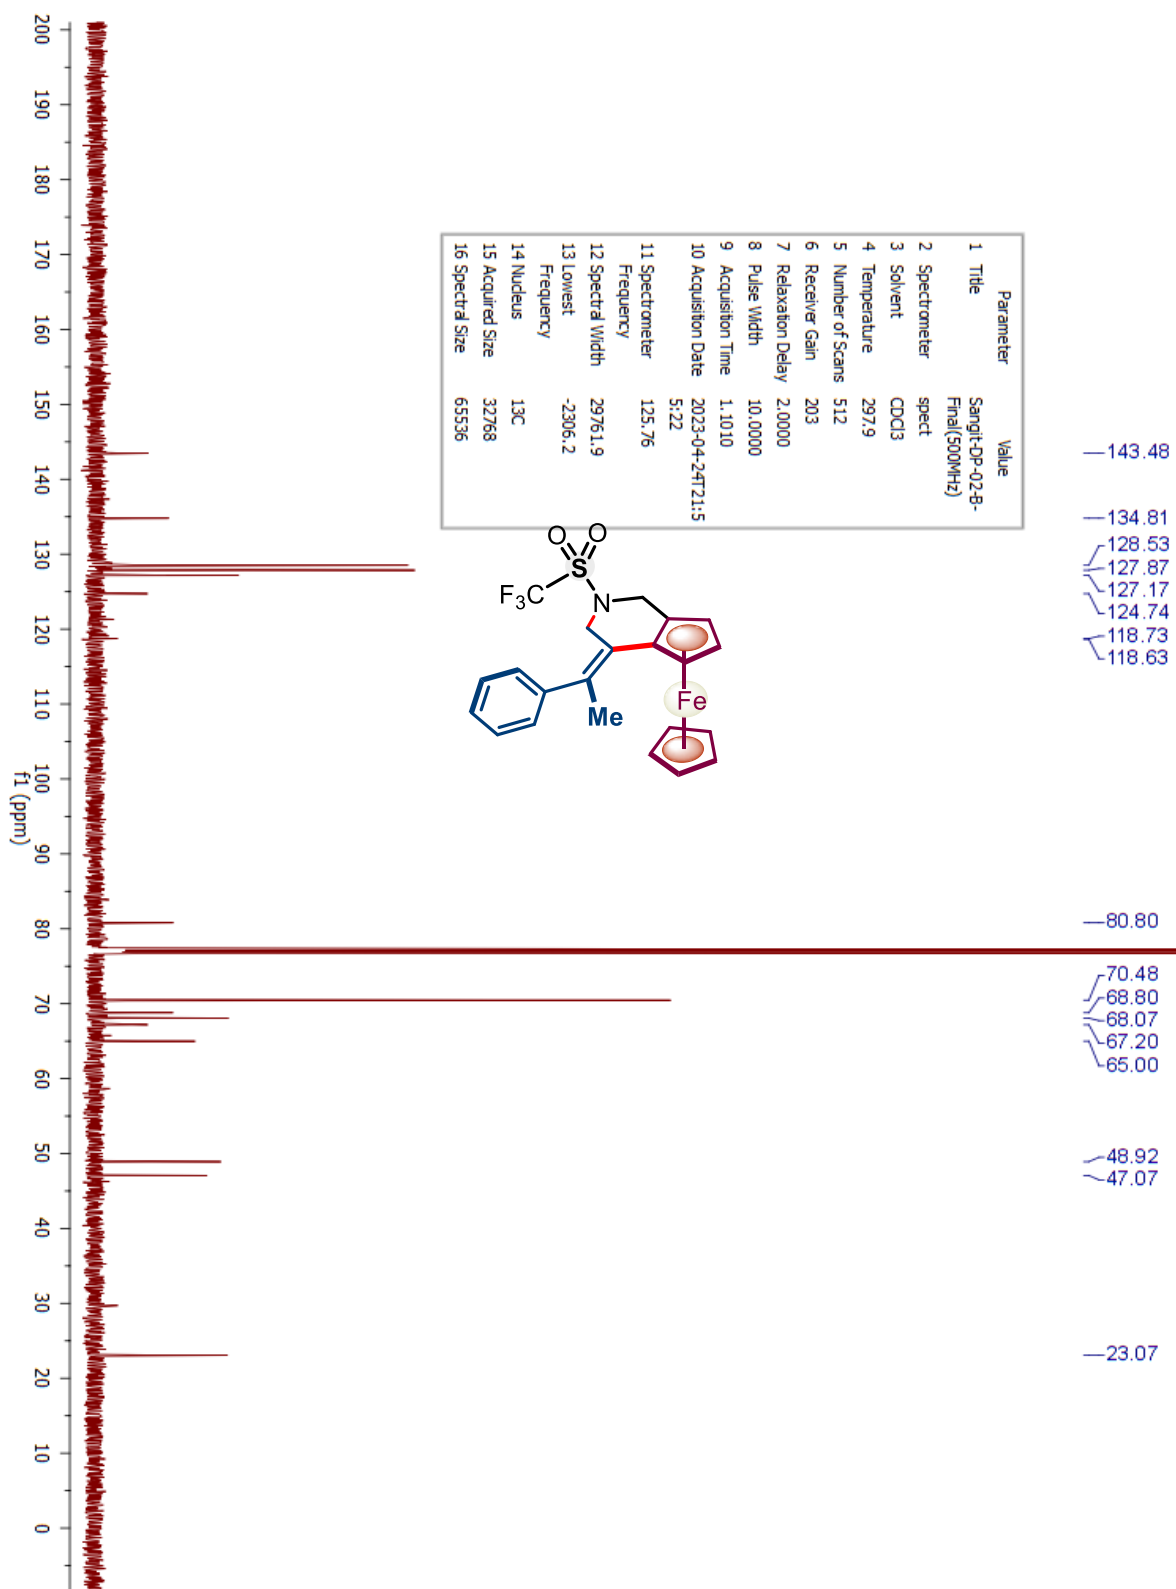

# <sup>19</sup>F NMR Spectrum of **3f**

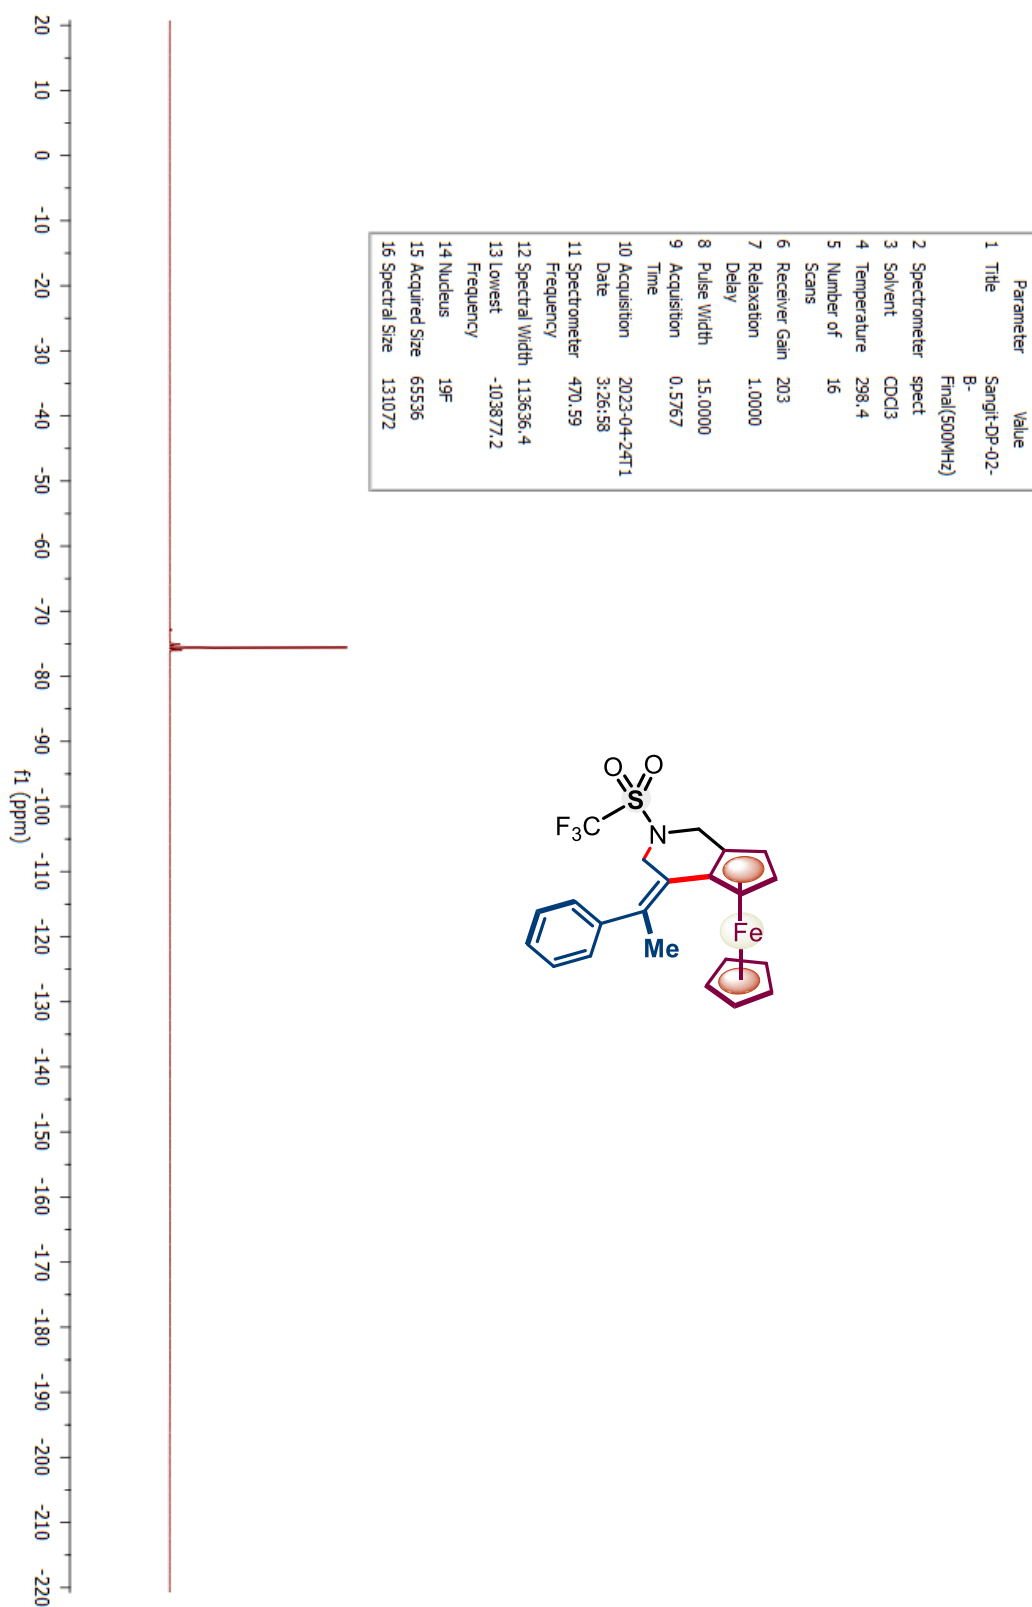

—75.57



<sup>1</sup>H NMR Spectrum of **3g**

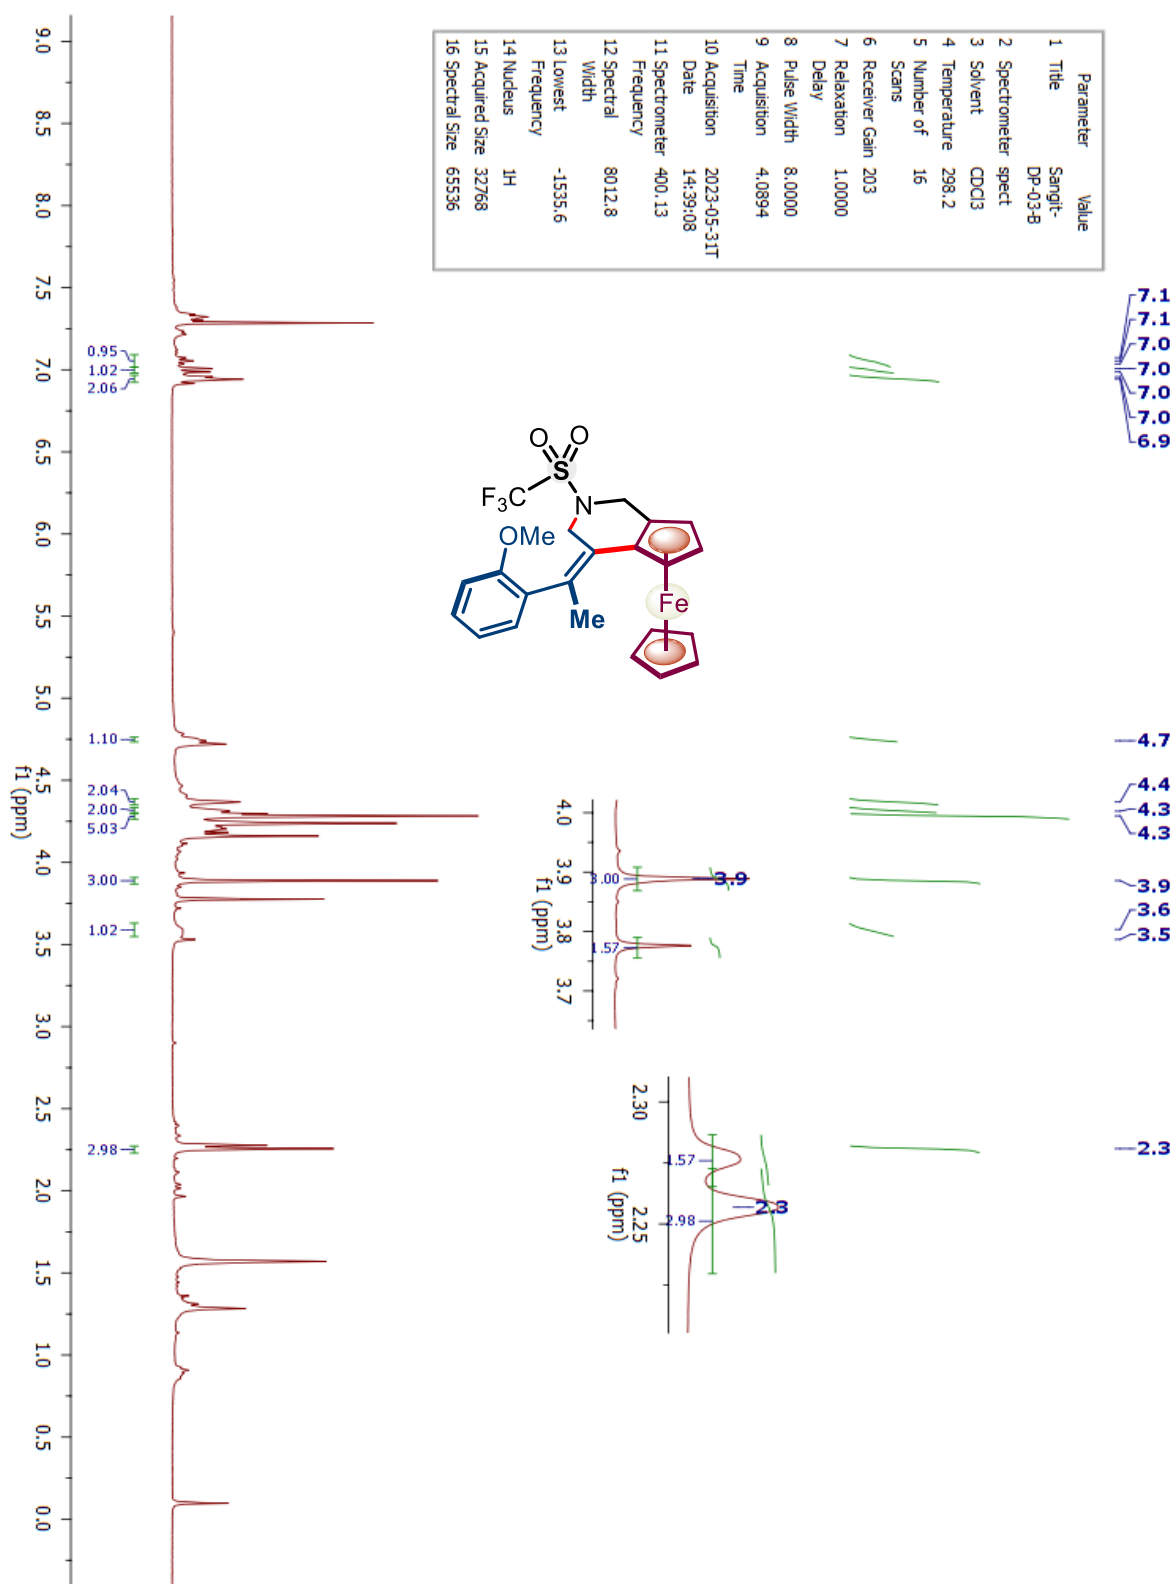

$^{13}\text{C}\{^1\text{H}\}$  NMR Spectrum of **3g**

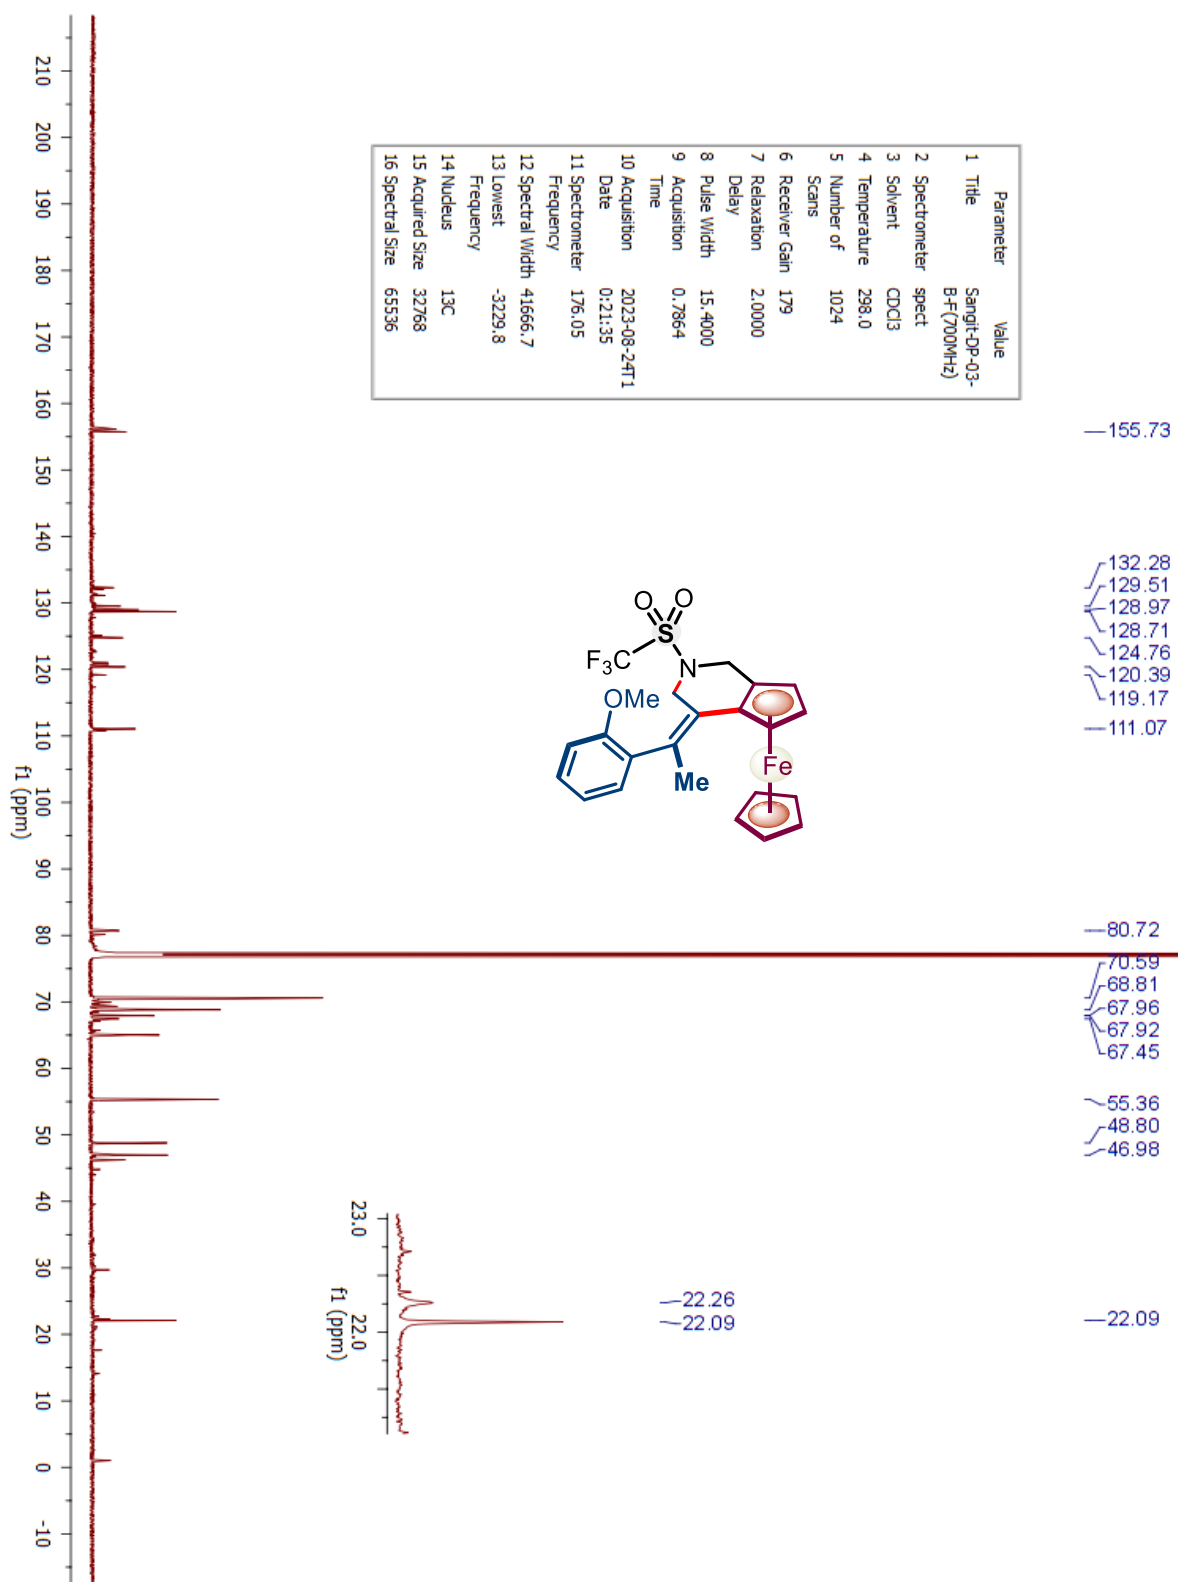

# <sup>19</sup>F NMR Spectrum of **3g**

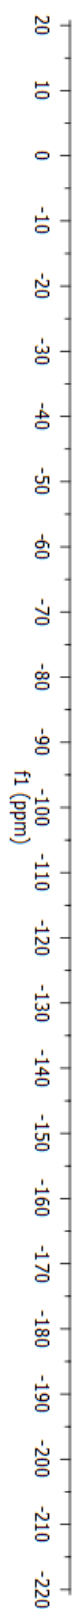

| Parameter                 | Value               |
|---------------------------|---------------------|
| 1 Title                   | DP-03-8-F           |
| 2 Spectrometer spect      |                     |
| 3 Solvent                 | CDCl3               |
| 4 Temperature             | 298.2               |
| 5 Number of Scans         | 16                  |
| 6 Receiver Gain           | 203                 |
| 7 Relaxation Delay        | 1.0000              |
| 8 Pulse Width             | 15.0000             |
| 9 Acquisition Time        | 0.5767              |
| 10 Acquisition Date       | 2023-08-26T13:09:49 |
| 11 Spectrometer Frequency | 470.59              |
| 12 Spectral Width         | 113636.4            |
| 13 Lowest Frequency       | -103877.2           |
| 14 Nucleus                | <sup>19</sup> F     |
| 15 Acquired Size          | 65536               |
| 16 Spectral Size          | 131072              |

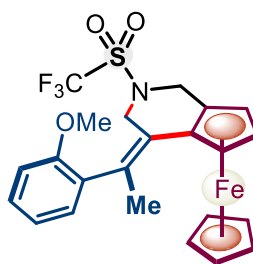

-75.41  
-75.99

# <sup>1</sup>H NMR Spectrum of **3h**

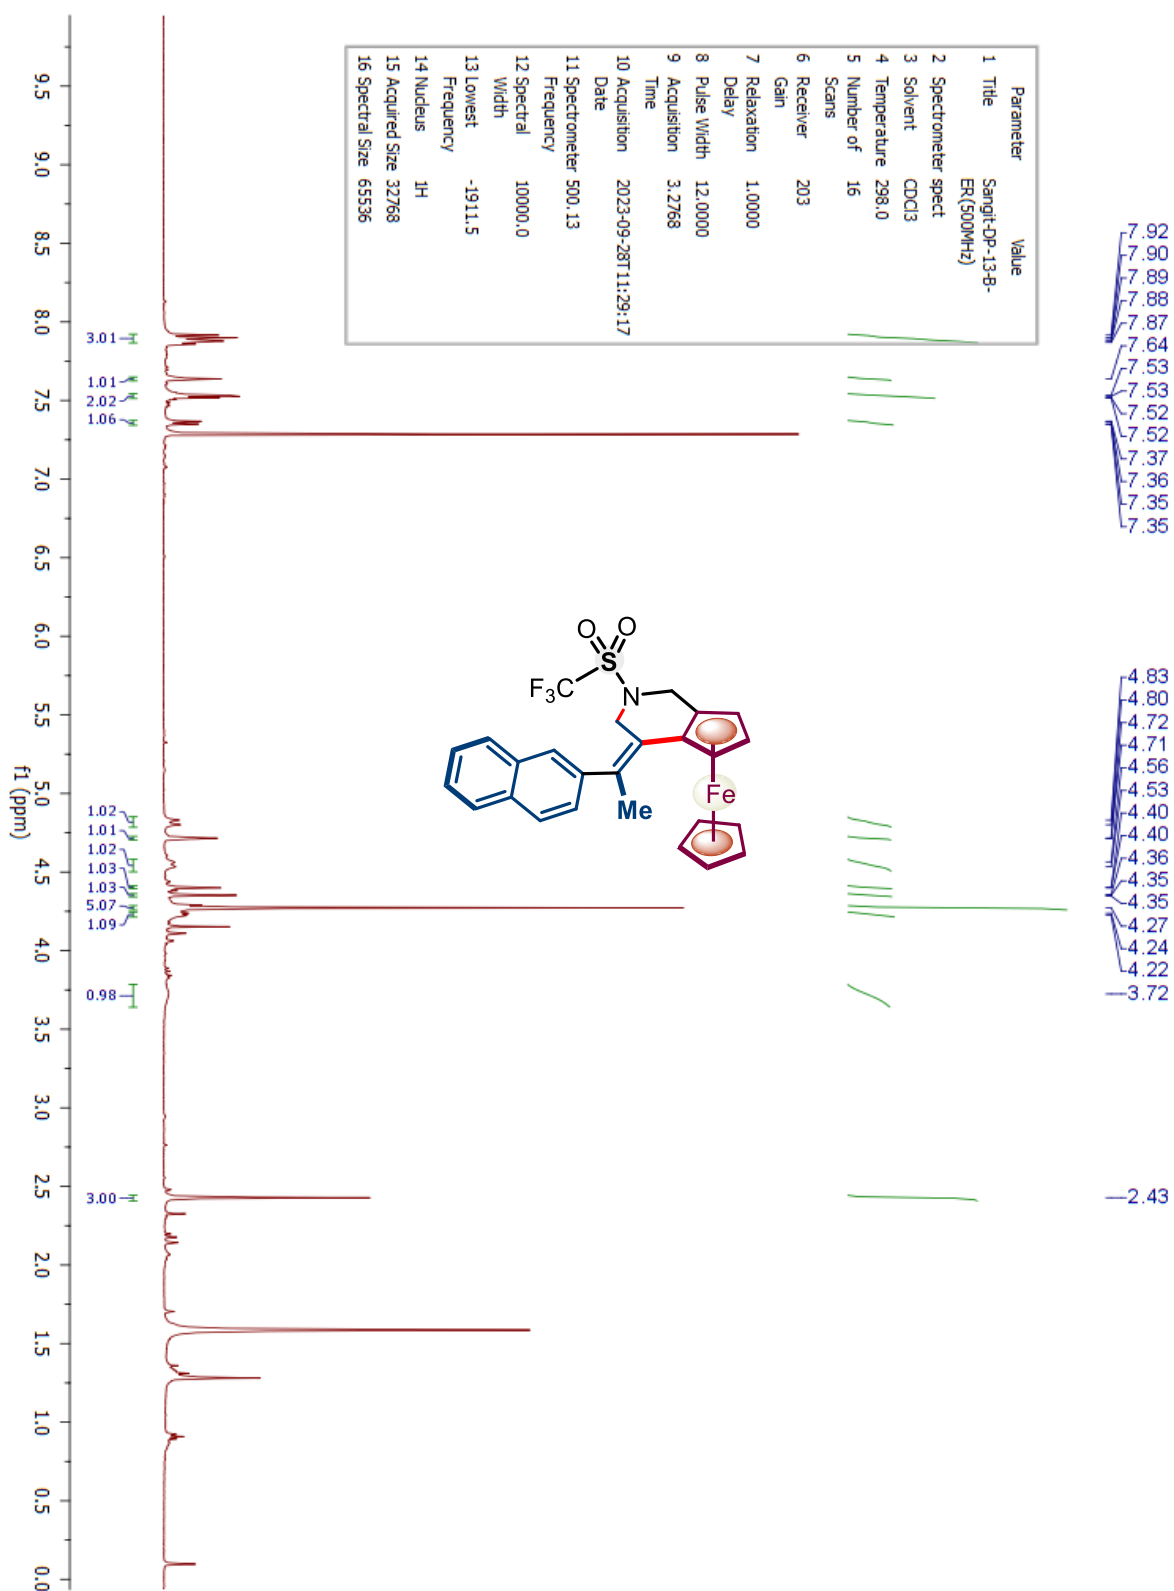

$^{13}\text{C}\{^1\text{H}\}$  NMR Spectrum of **3h**

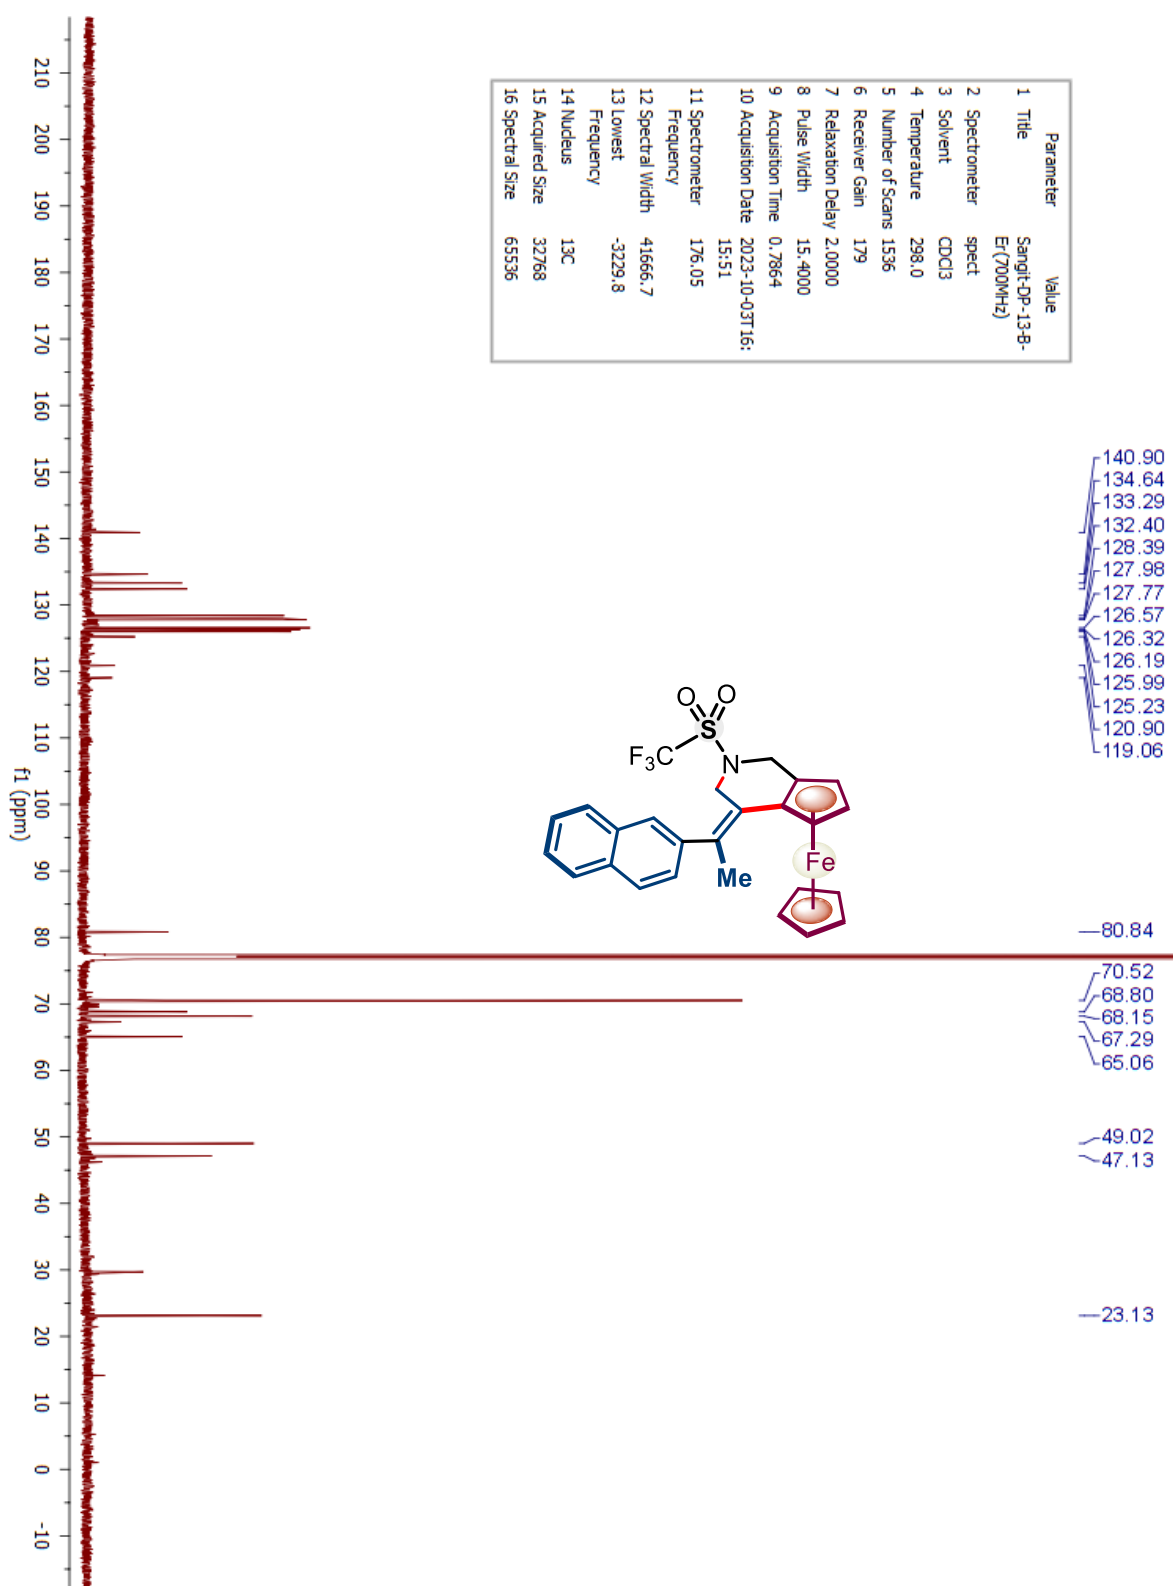

| Parameter           | Value                      |
|---------------------|----------------------------|
| 1 Title             | Sangit-DP-13-B-EI (700MHz) |
| 2 Spectrometer      | spect                      |
| 3 Solvent           | CDCl3                      |
| 4 Temperature       | 298.0                      |
| 5 Number of Scans   | 1536                       |
| 6 Receiver Gain     | 179                        |
| 7 Relaxation Delay  | 2.0000                     |
| 8 Pulse Width       | 15.4000                    |
| 9 Acquisition Time  | 0.7864                     |
| 10 Acquisition Date | 2023-10-03T16:15:51        |
| 11 Spectrometer     | 176.05                     |
| Frequency           |                            |
| 12 Spectral Width   | 41666.7                    |
| 13 Lowest Frequency | -3229.8                    |
| 14 Nucleus          | $^{13}\text{C}$            |
| 15 Acquired Size    | 32768                      |
| 16 Spectral Size    | 65536                      |

# <sup>19</sup>F NMR Spectrum of **3h**

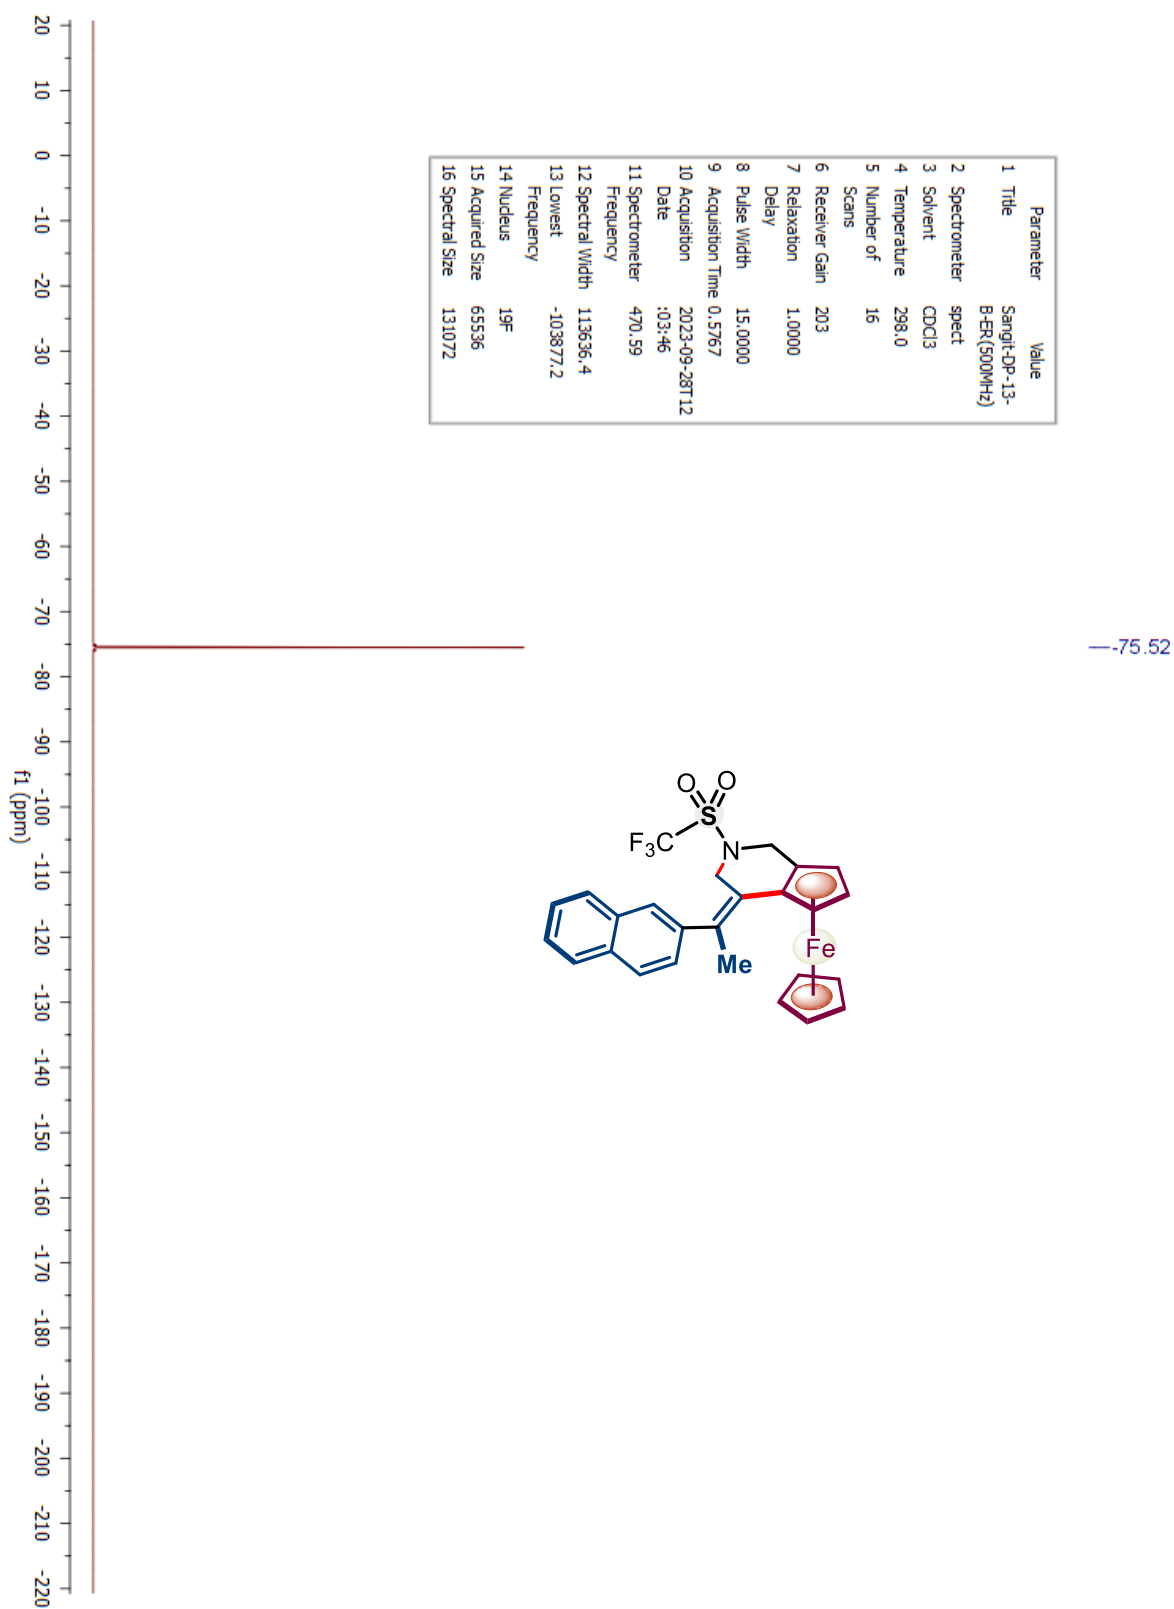

# <sup>1</sup>H NMR Spectrum of **3i**

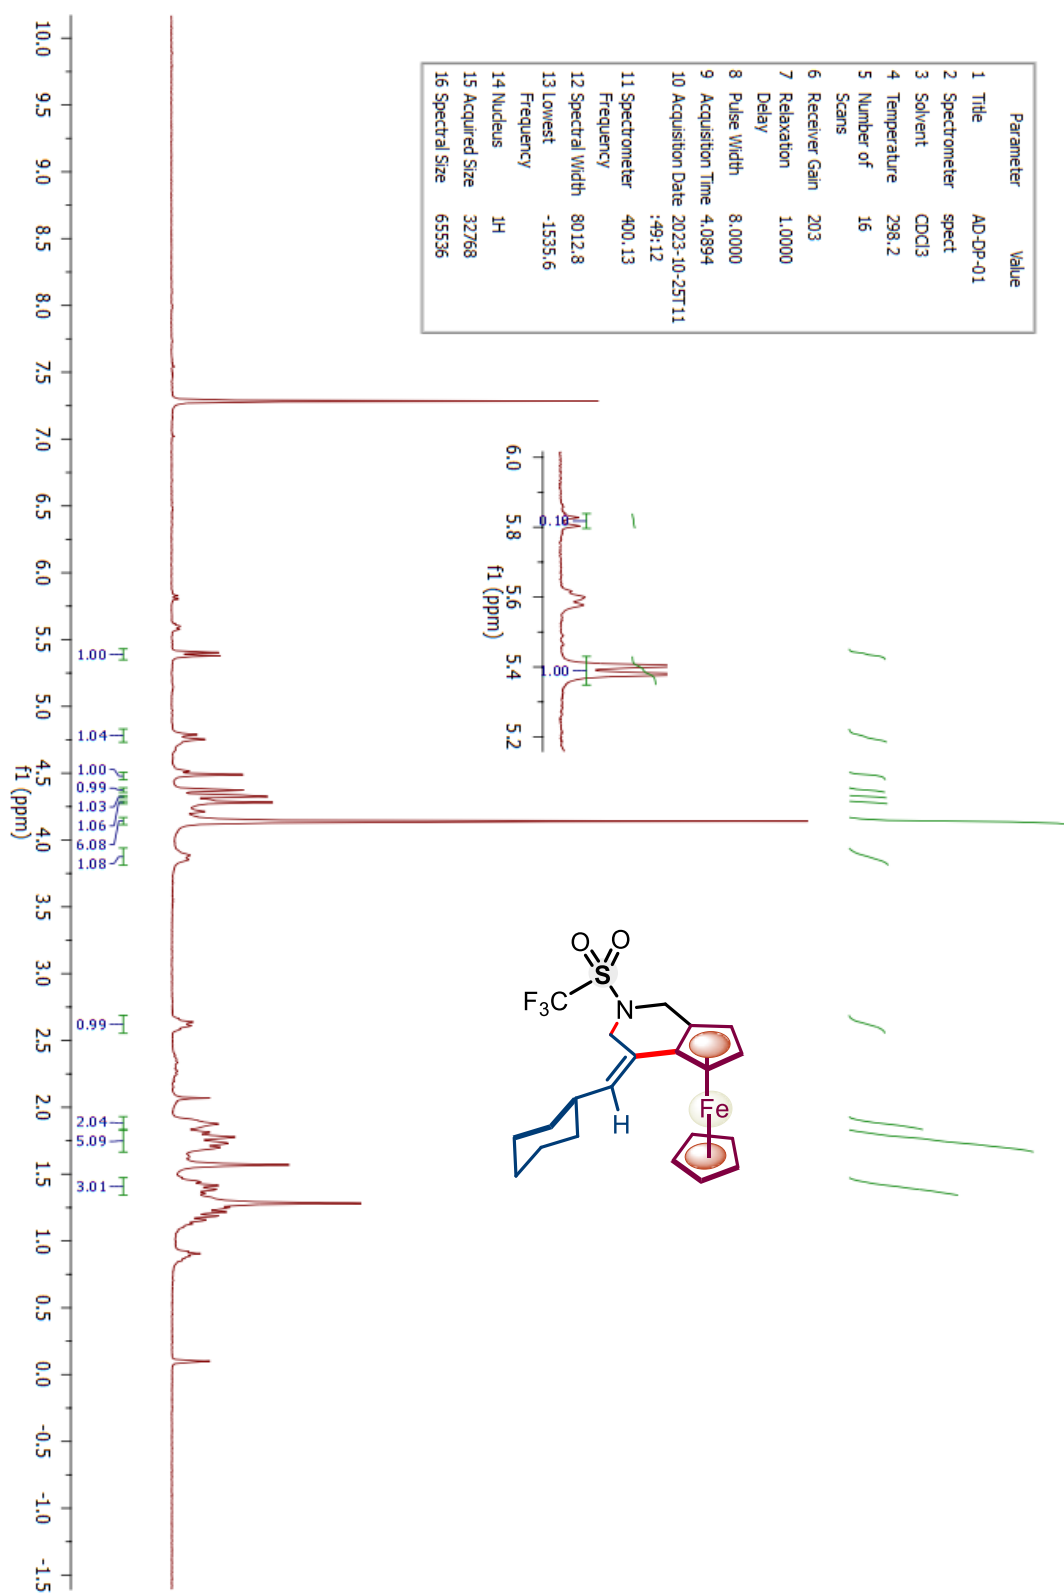

$^{13}\text{C}\{^1\text{H}\}$  NMR Spectrum of **3i**

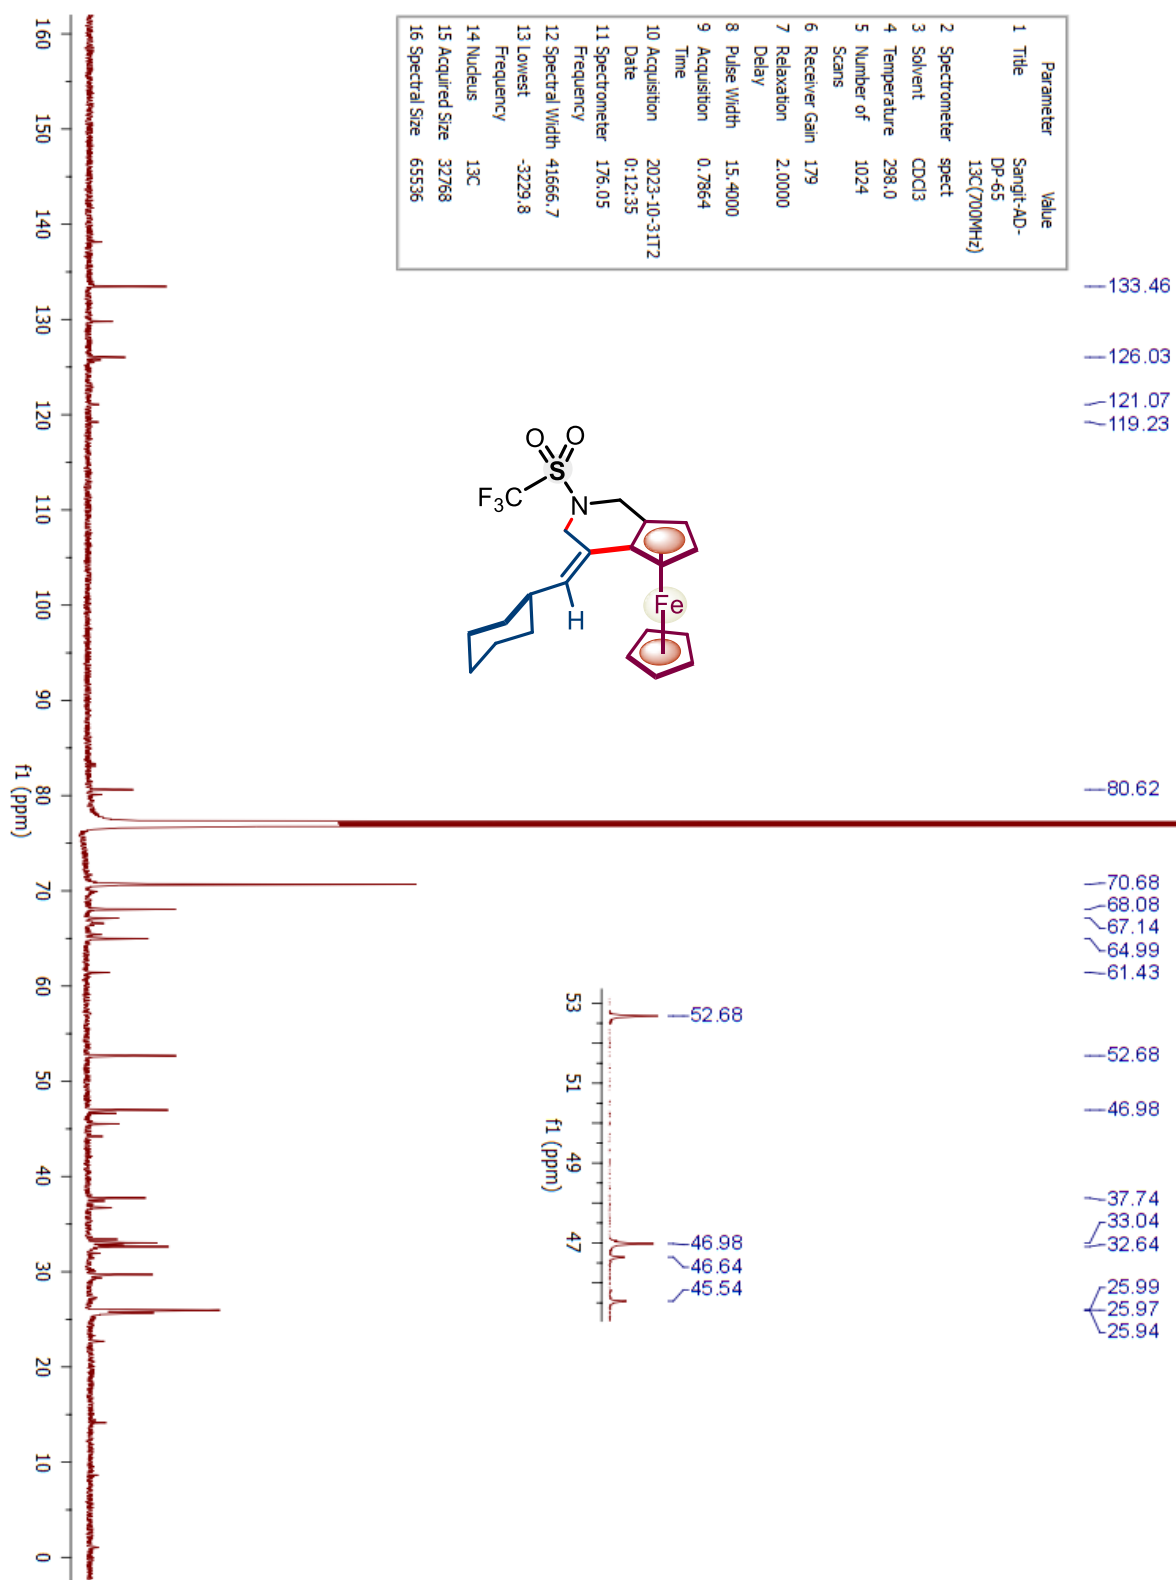



# <sup>19</sup>F NMR Spectrum of **3i**

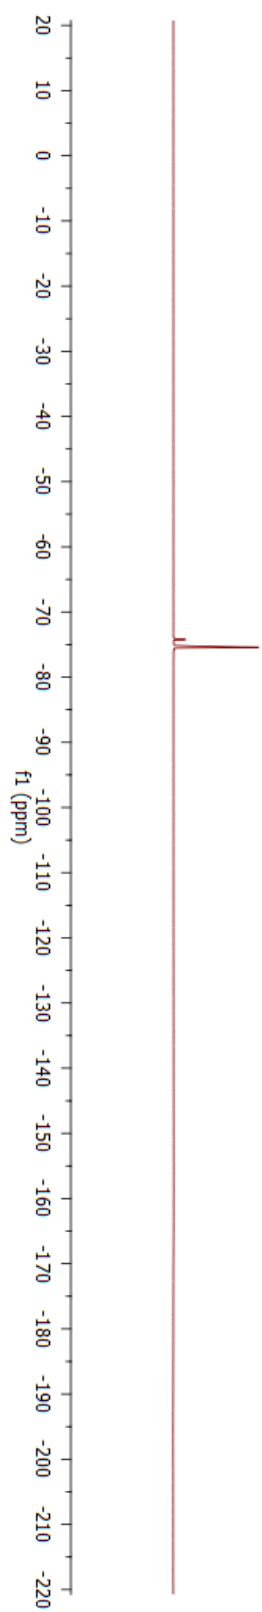

| Parameter            | Value               |
|----------------------|---------------------|
| 1 Title              | AD-DP-01            |
| 2 Spectrometer spect |                     |
| 3 Solvent            | CDCl3               |
| 4 Temperature        | 298.1               |
| 5 Number of Scans    | 16                  |
| 6 Receiver Gain      | 203                 |
| 7 Relaxation Delay   | 1.0000              |
| 8 Pulse Width        | 15.0000             |
| 9 Acquisition Time   | 0.5767              |
| 10 Acquisition Date  | 2023-10-26T16:40:09 |
| 11 Spectrometer      | 470.59              |
| Frequency            |                     |
| 12 Spectral Width    | 113636.4            |
| 13 Lowest Frequency  | -103877.2           |
| 14 Nucleus           | <sup>19</sup> F     |
| 15 Acquired Size     | 65536               |
| 16 Spectral Size     | 131072              |

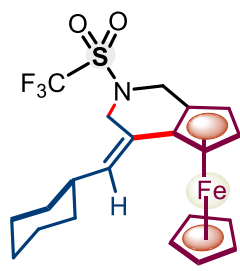

-74.23  
-75.42

<sup>1</sup>H NMR Spectrum of **3j**

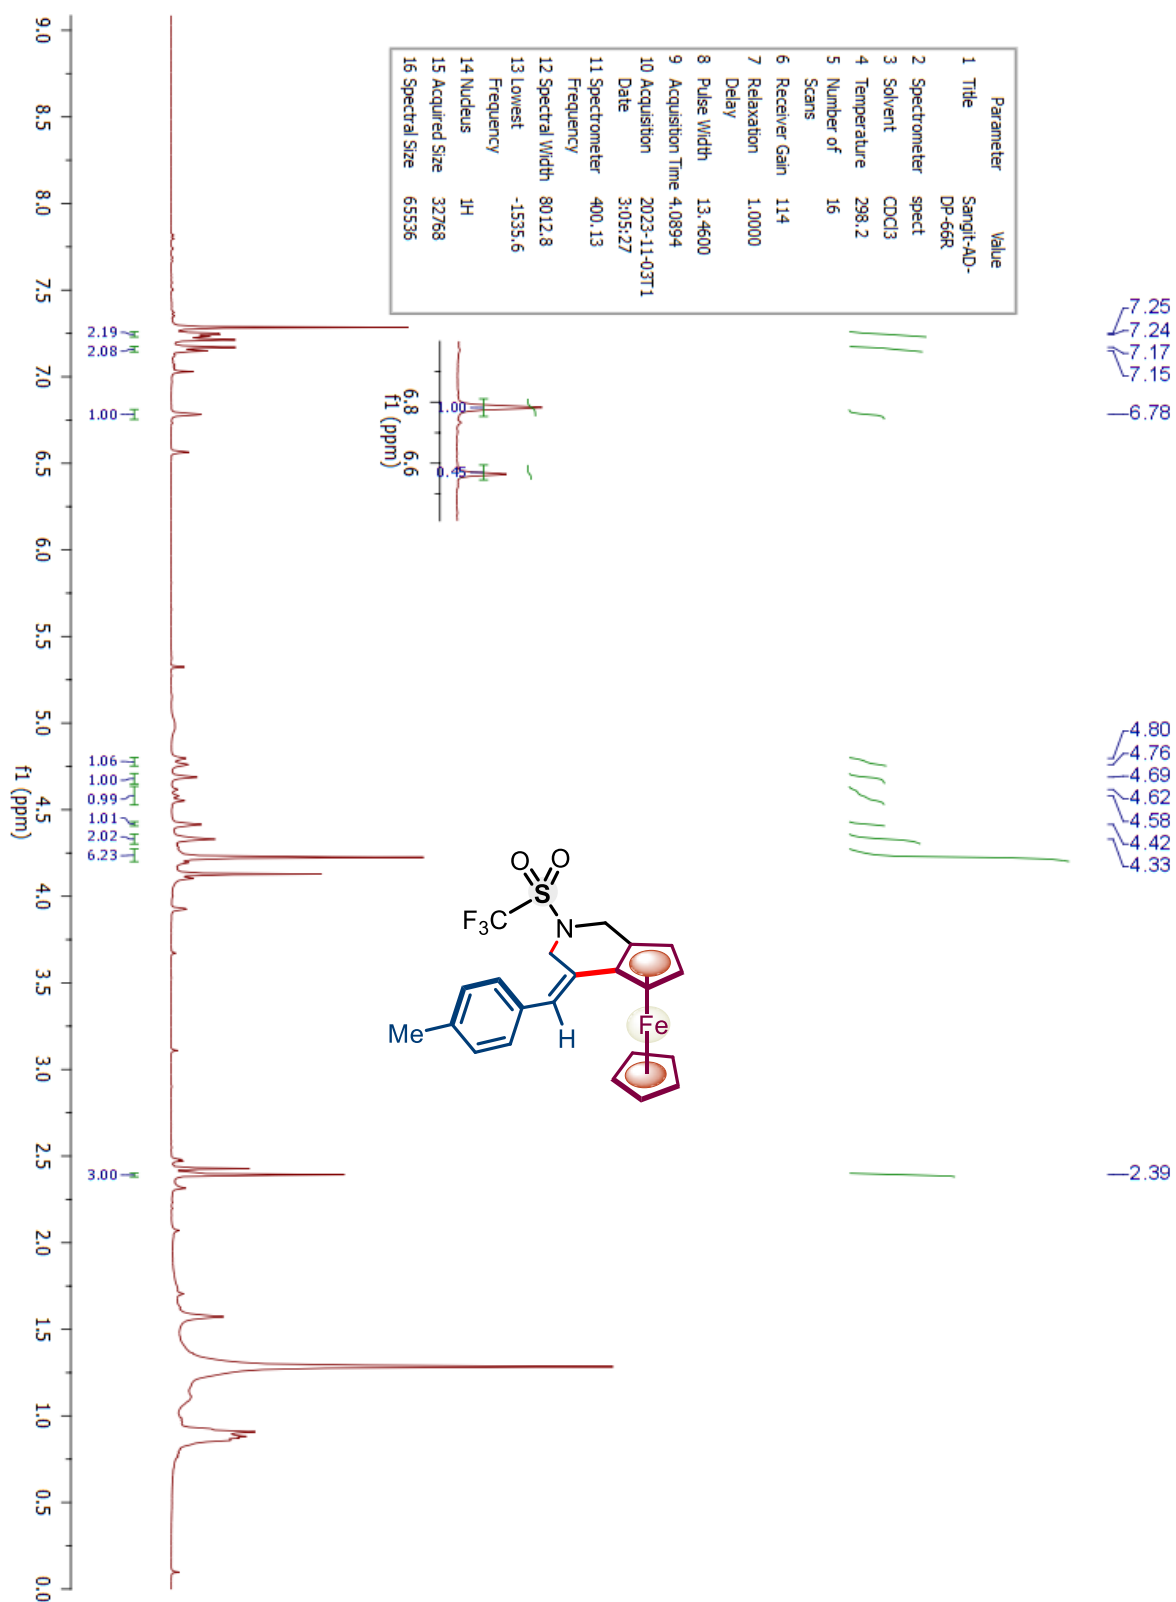

$^{13}\text{C}\{^1\text{H}\}$  NMR Spectrum of **3j**

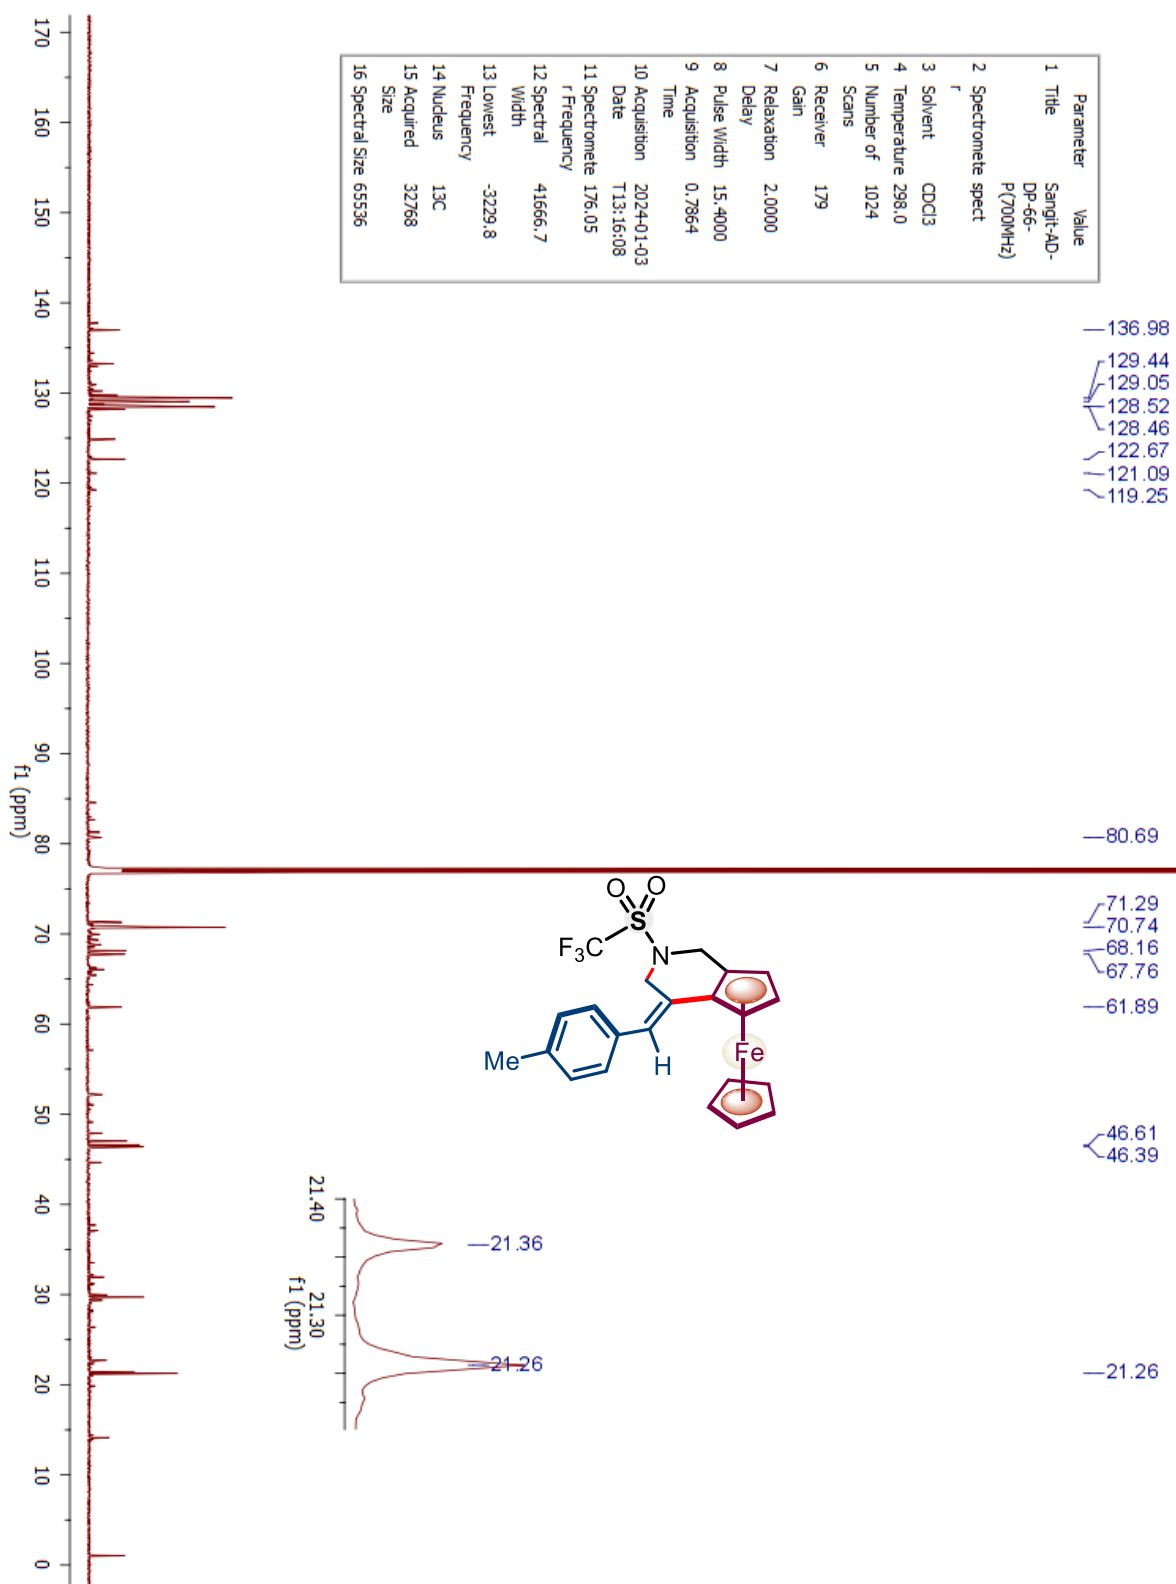

| Parameter                     | Value                             |
|-------------------------------|-----------------------------------|
| 1 Title                       | Sangit-AD-<br>DP-66-<br>P(700MHz) |
| 2 Spectromete spect<br>r      |                                   |
| 3 Solvent                     | CDCl3                             |
| 4 Temperature                 | 298.0                             |
| 5 Number of<br>Scans          | 1024                              |
| 6 Receiver<br>Gain            | 179                               |
| 7 Relaxation<br>Delay         | 2.0000                            |
| 8 Pulse Width                 | 15.4000                           |
| 9 Acquisition<br>Time         | 0.7864                            |
| 10 Acquisition<br>Date        | 2024-01-03<br>T13:16:08           |
| 11 Spectromete<br>r Frequency | 176.05                            |
| 12 Spectral<br>Width          | 41666.7                           |
| 13 Lowest<br>Frequency        | -3229.8                           |
| 14 Nucleus                    | $^{13}\text{C}$                   |
| 15 Acquired<br>Size           | 32768                             |
| 16 Spectral Size              | 65536                             |

# <sup>19</sup>F NMR Spectrum of **3j**

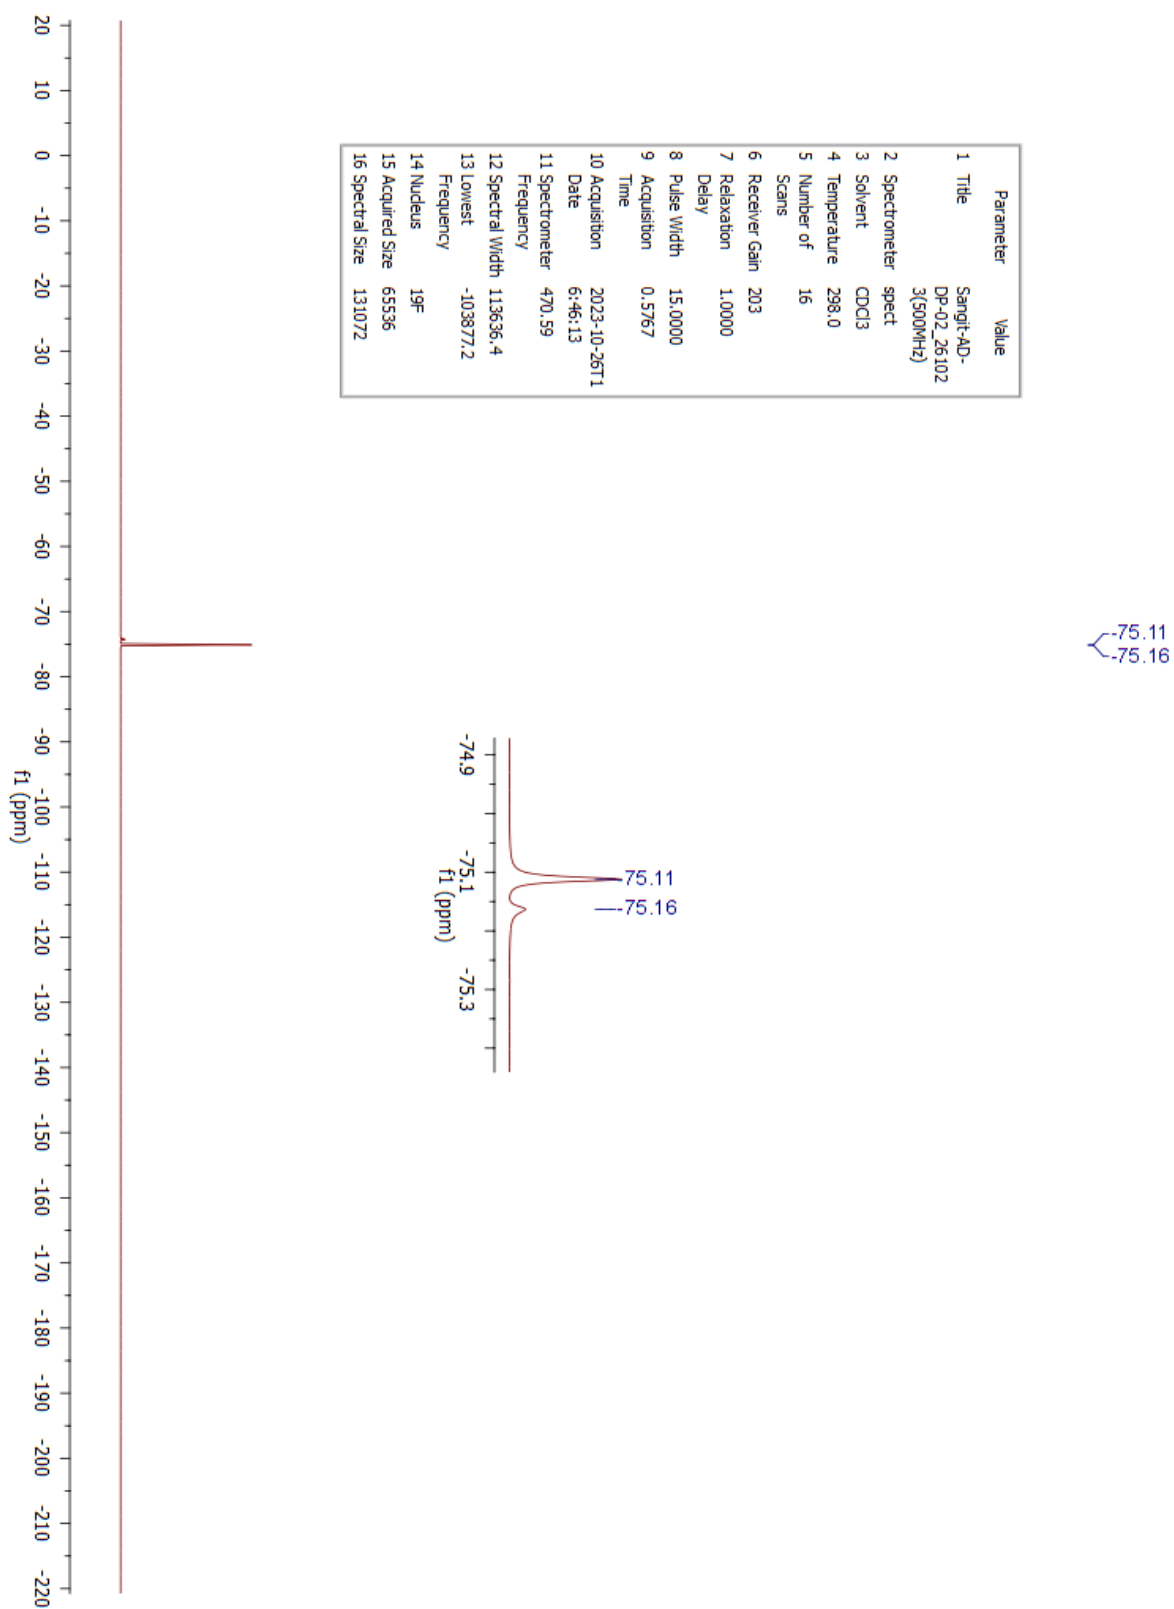

<sup>1</sup>H NMR Spectrum of **3k**

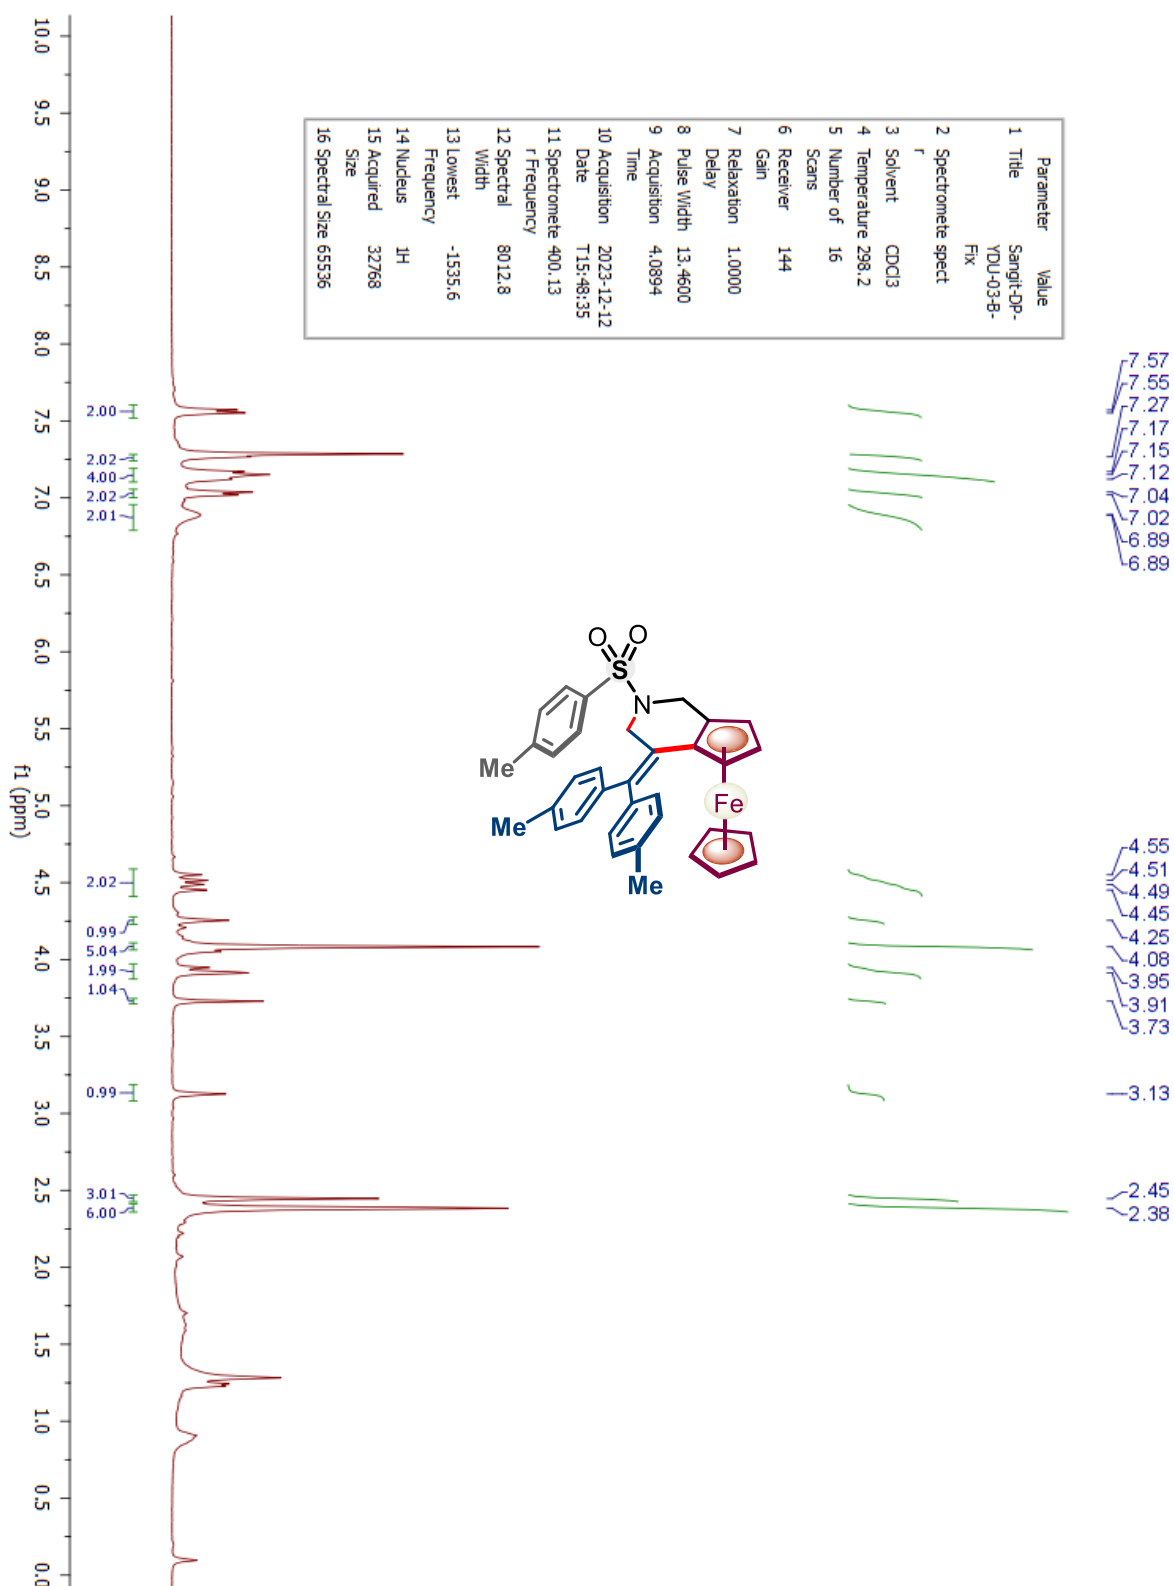

$^{13}\text{C}\{^1\text{H}\}$  NMR Spectrum of **3k**

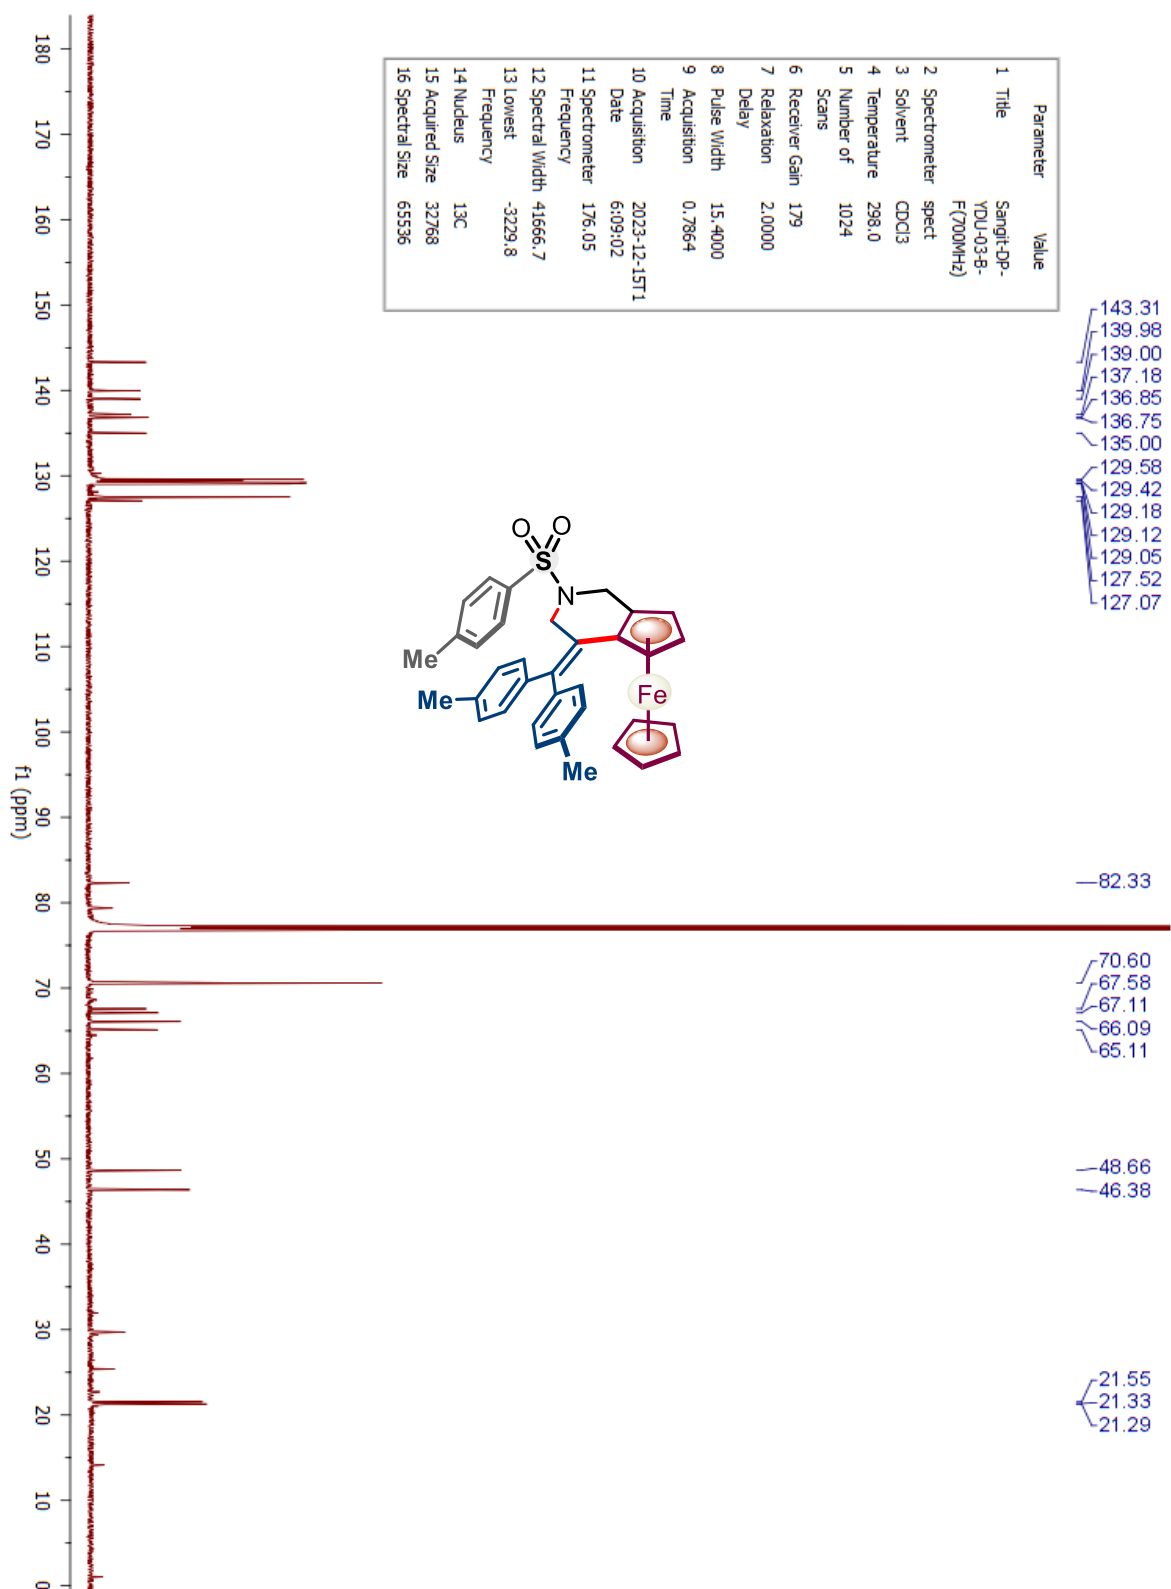

<sup>1</sup>H NMR Spectrum of **31**

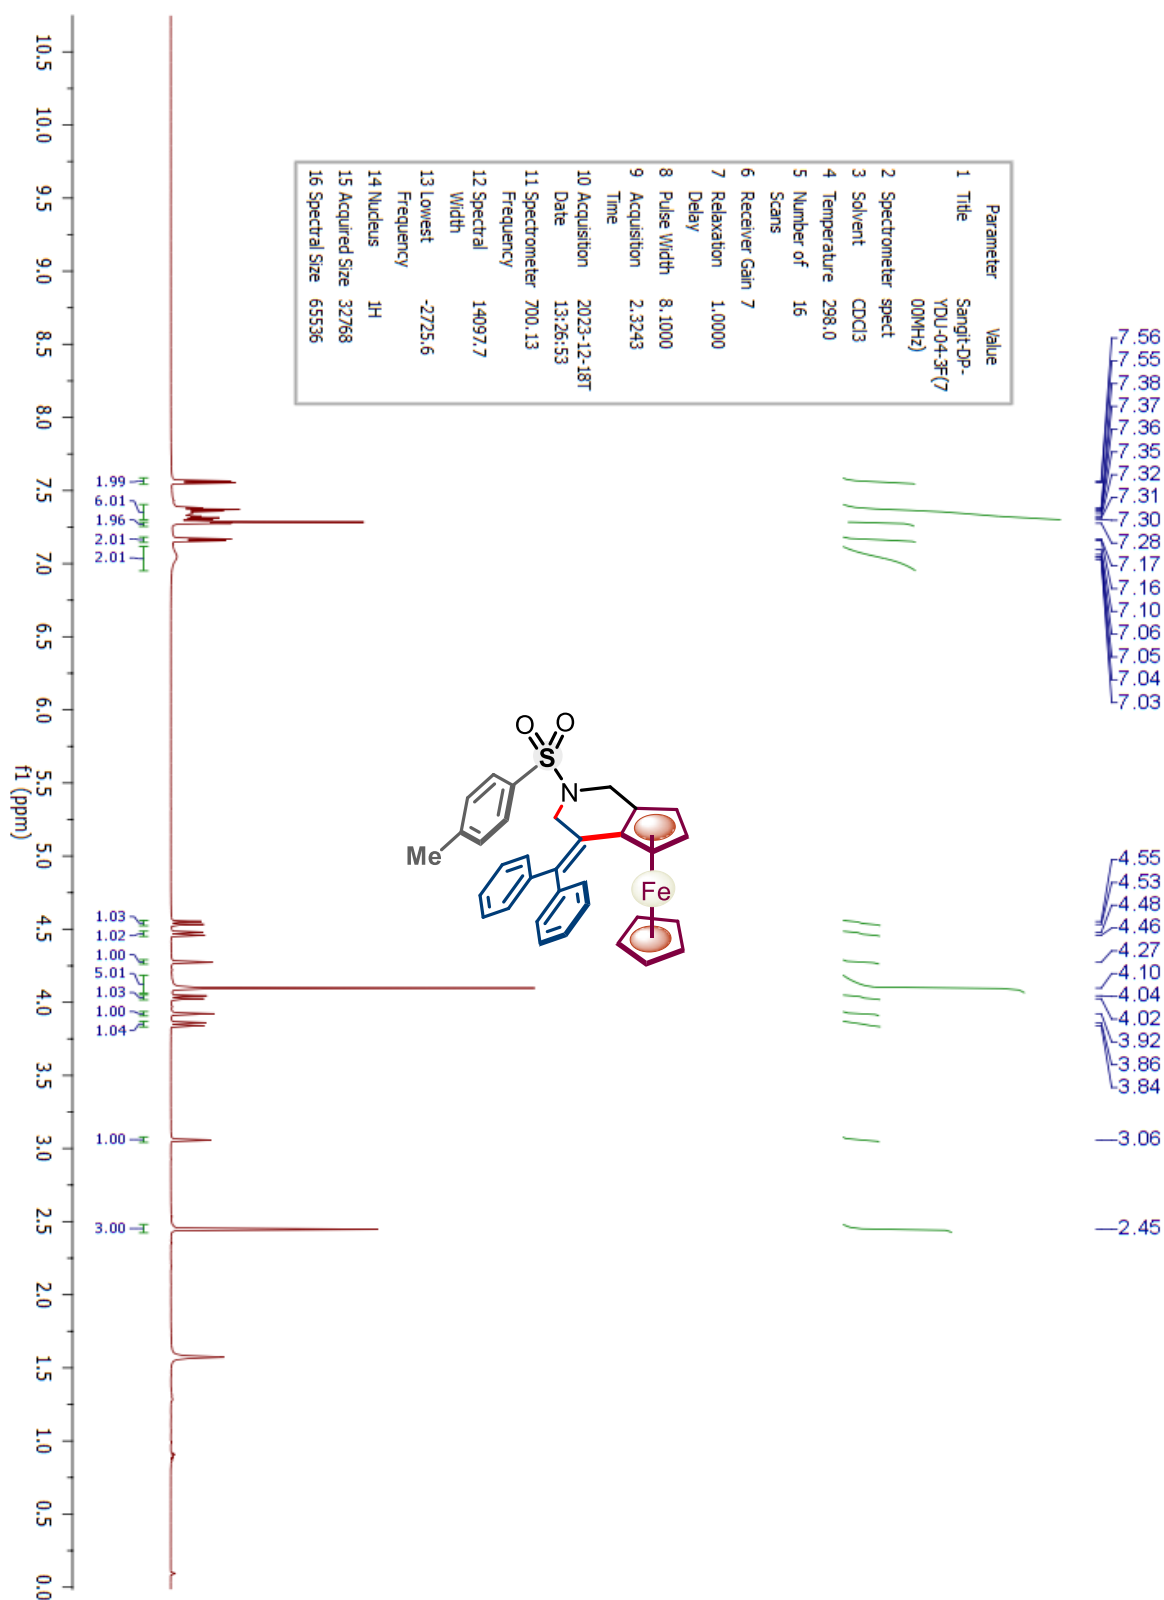

$^{13}\text{C}\{^1\text{H}\}$  NMR Spectrum of **31**

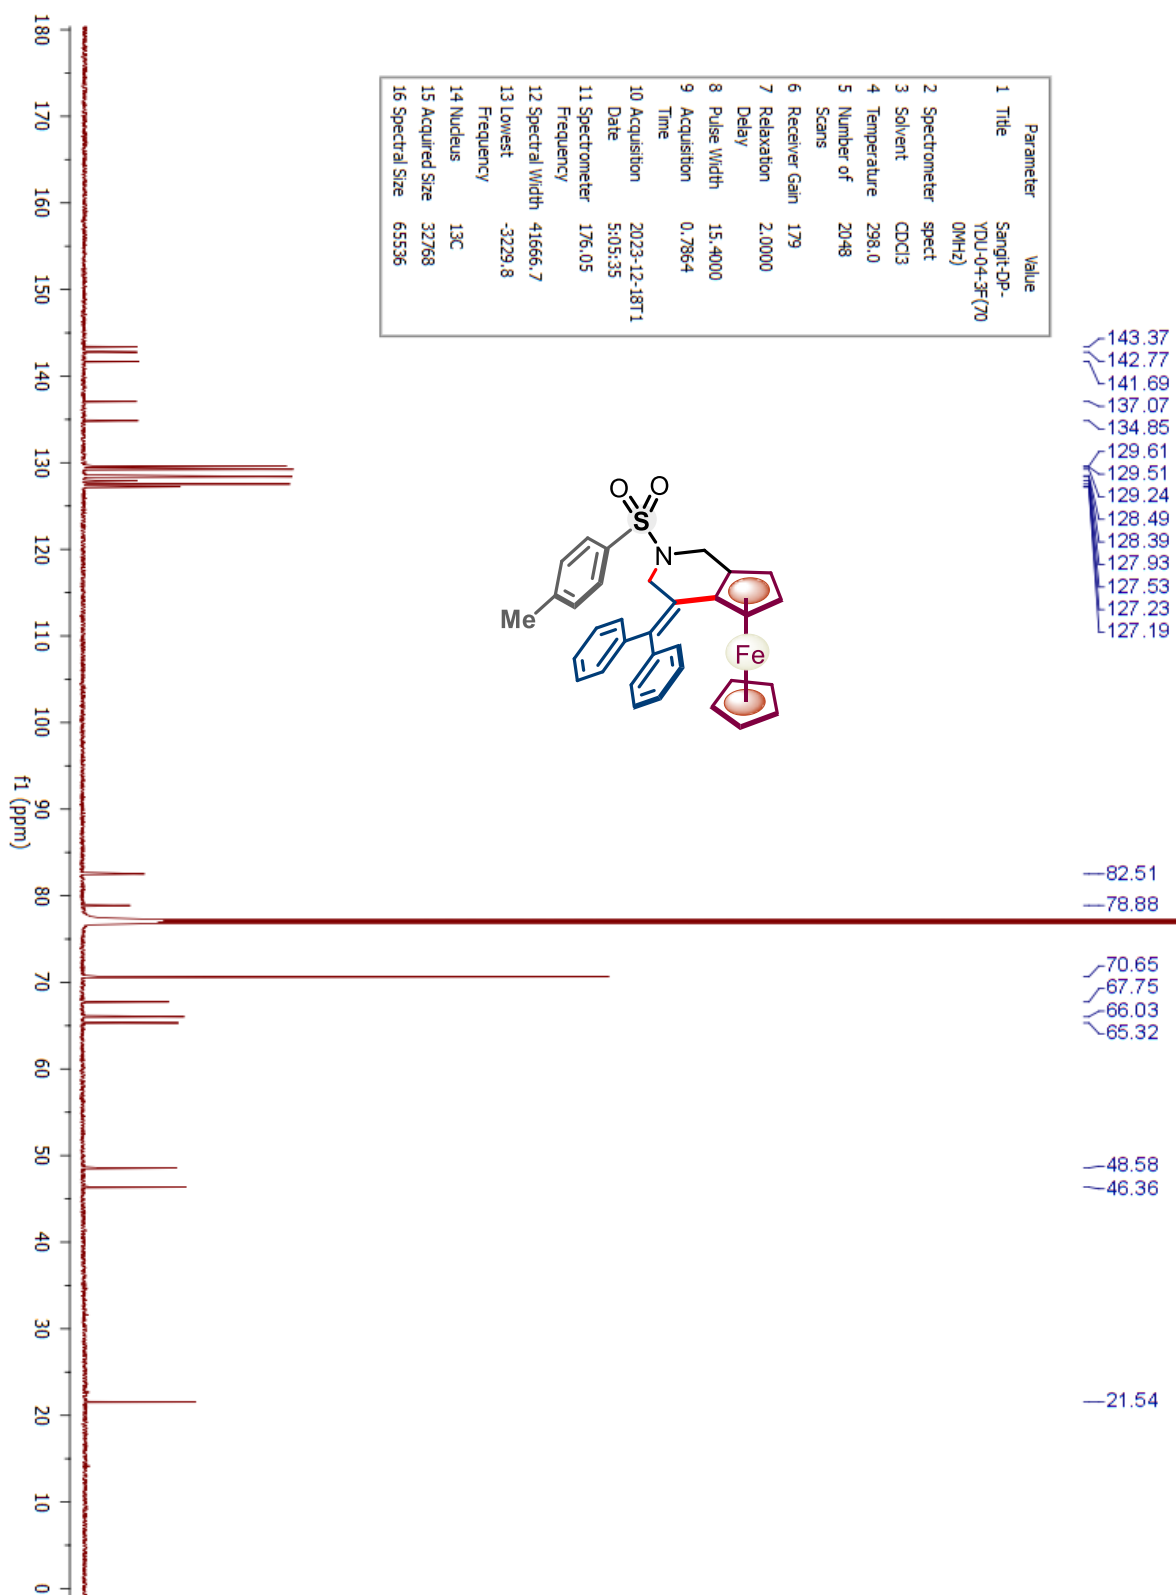



# <sup>1</sup>H NMR Spectrum of **3m**

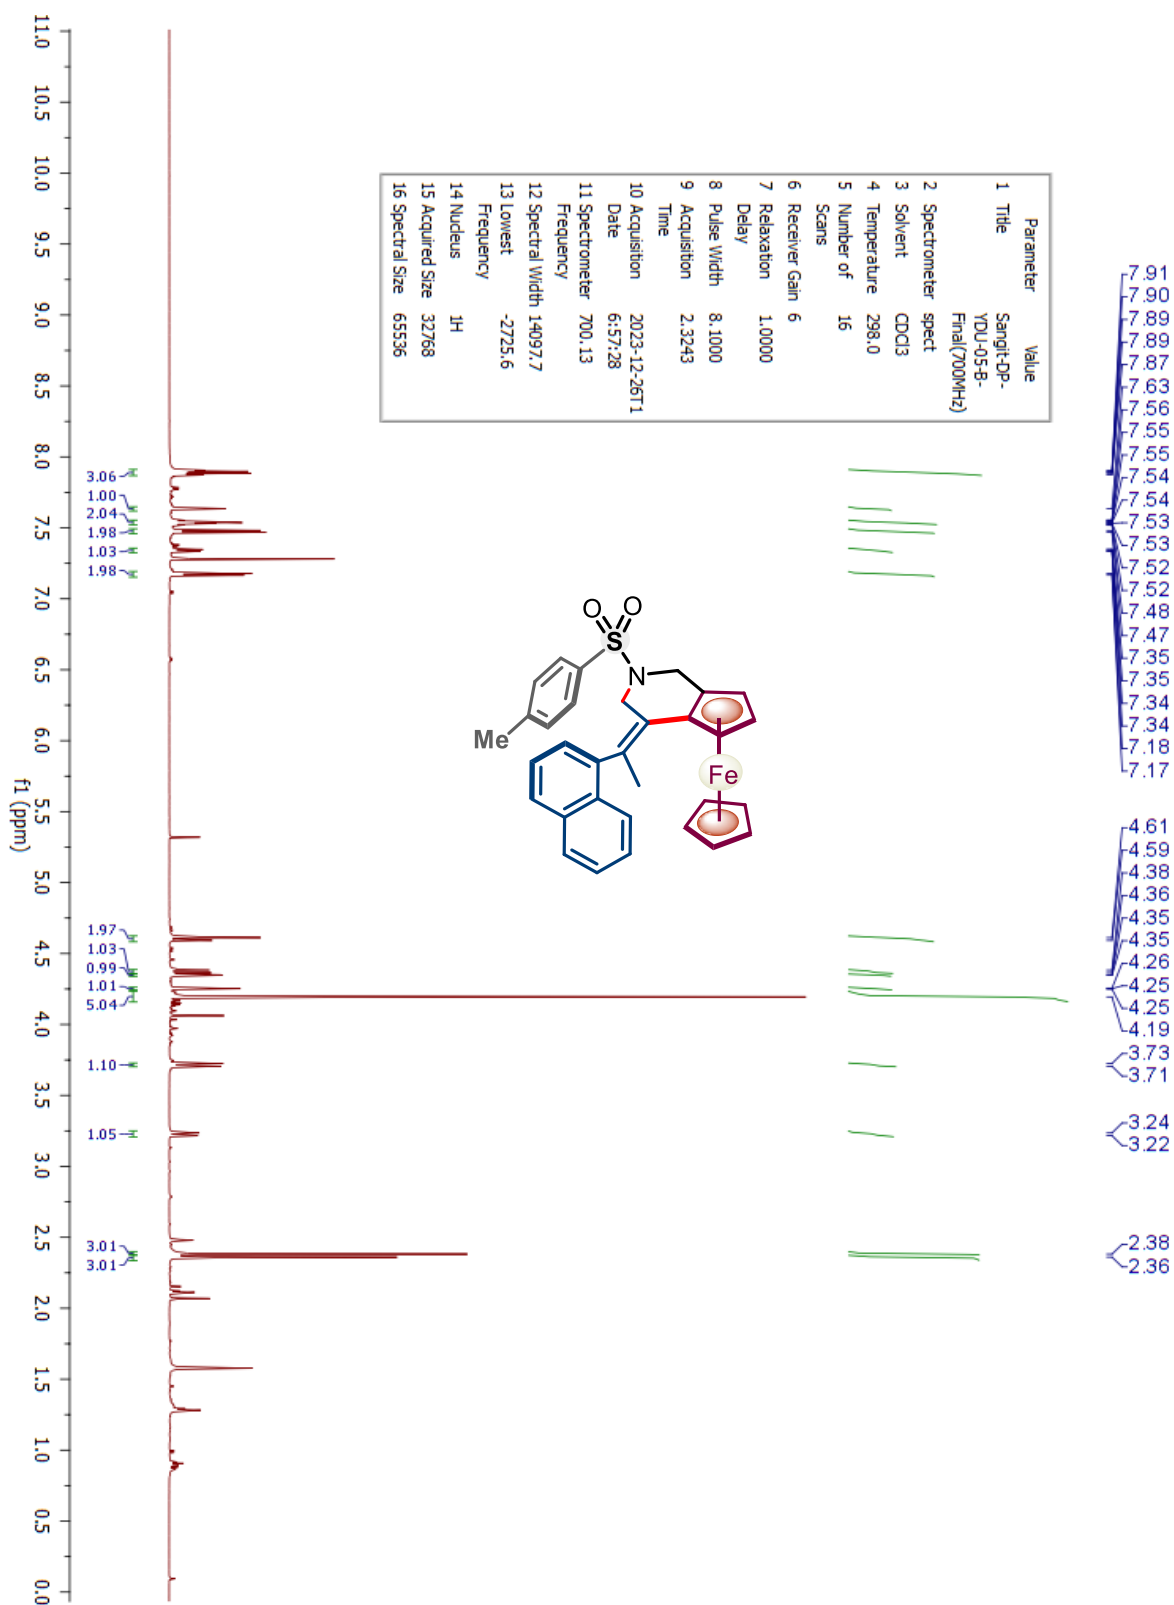

# $^{13}\text{C}\{^1\text{H}\}$ NMR Spectrum of **3m**

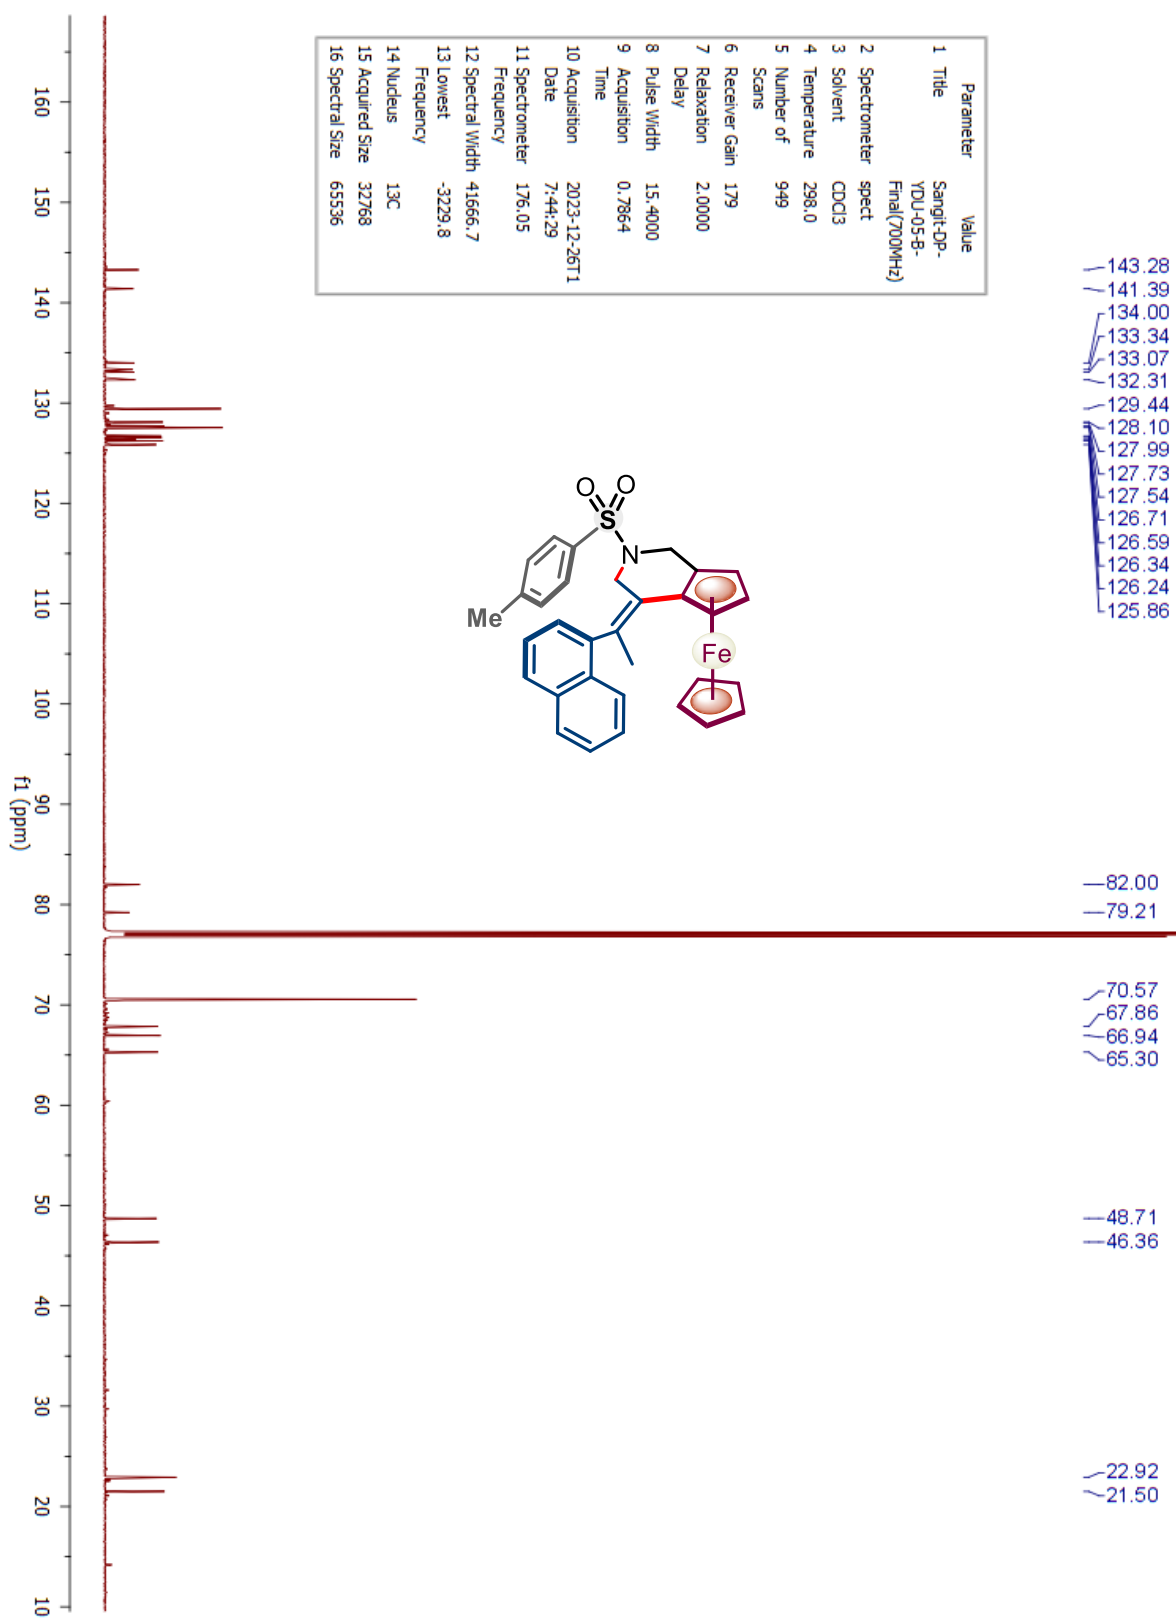

# <sup>1</sup>H NMR Spectrum of 3n

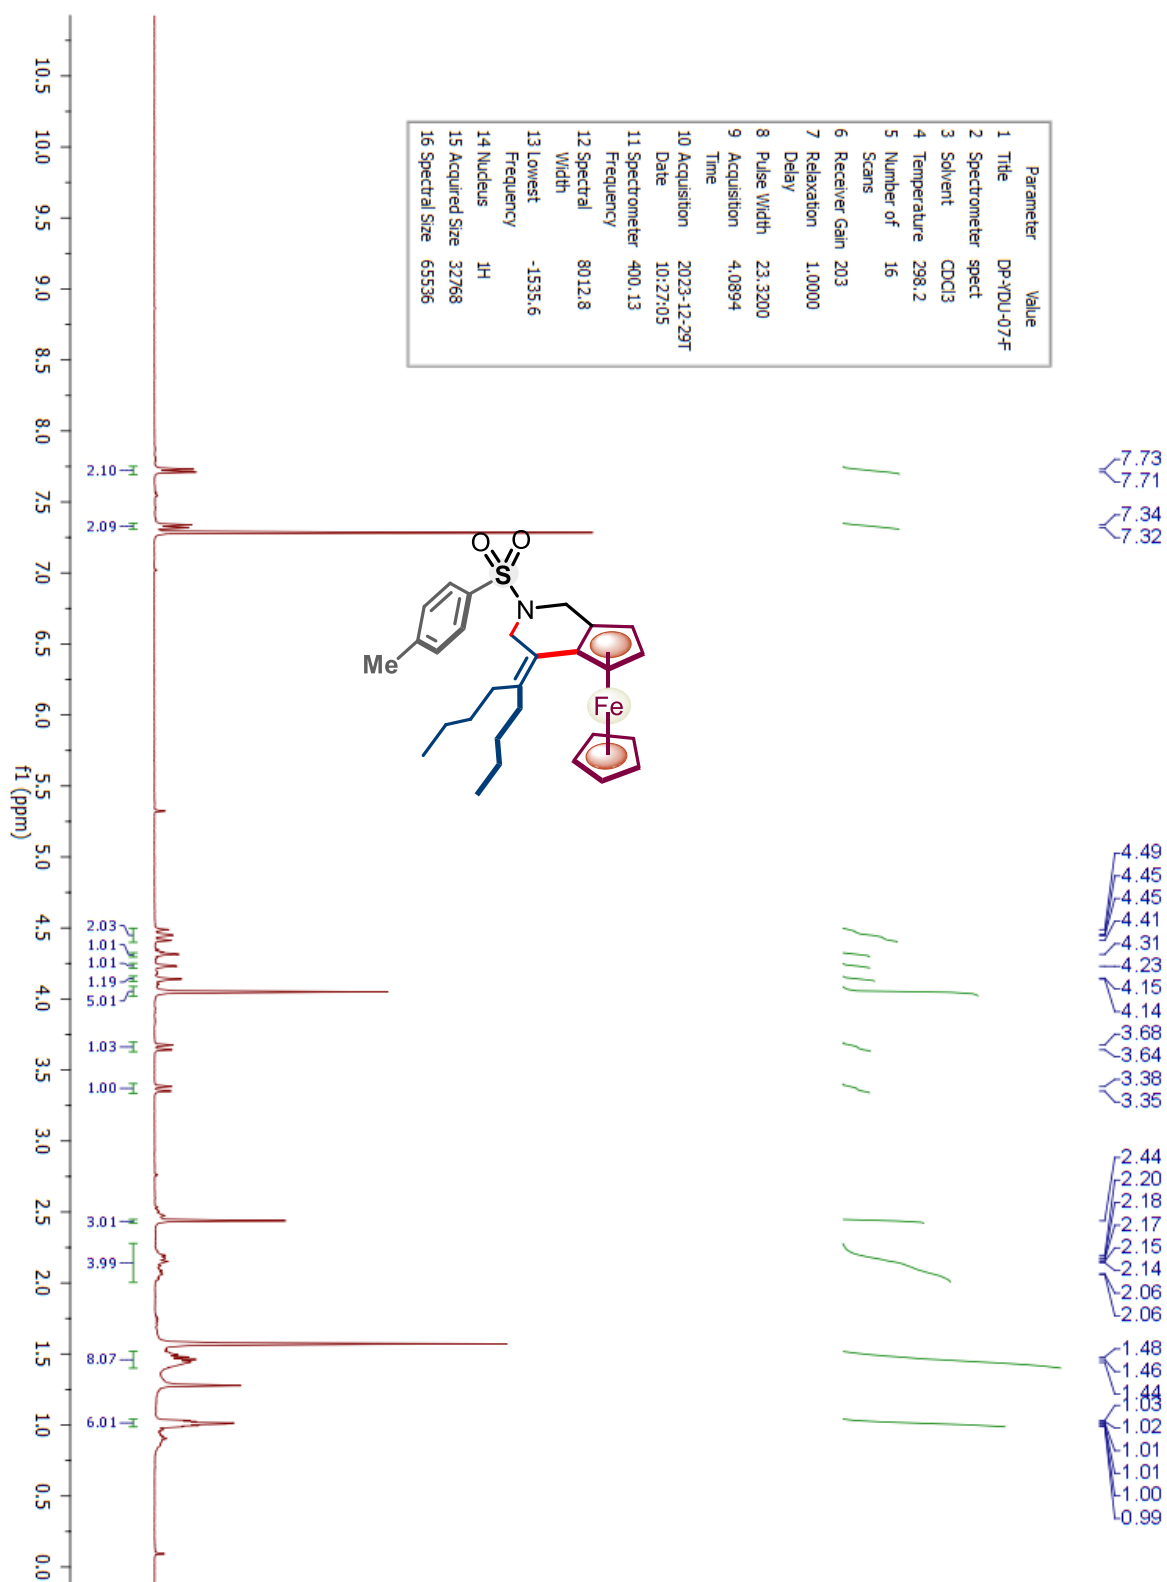

$^{13}\text{C}\{^1\text{H}\}$  NMR Spectrum of **3n**

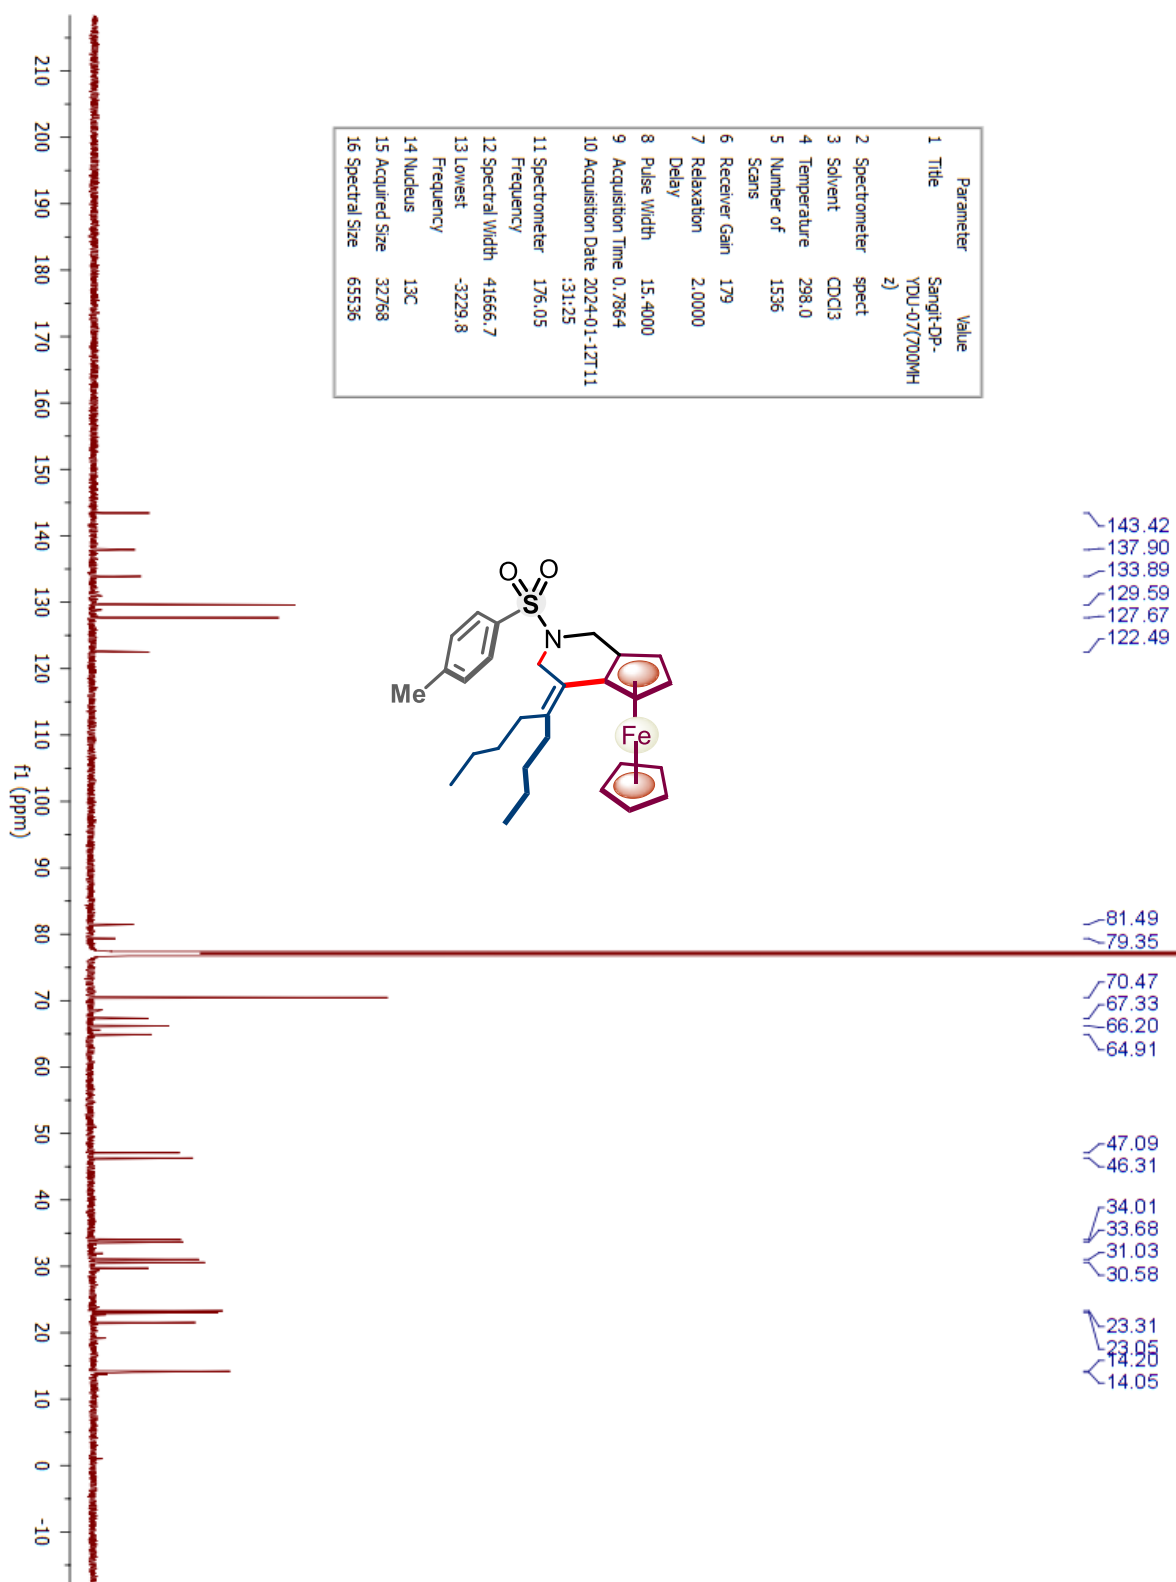

<sup>1</sup>H NMR Spectrum of **30**

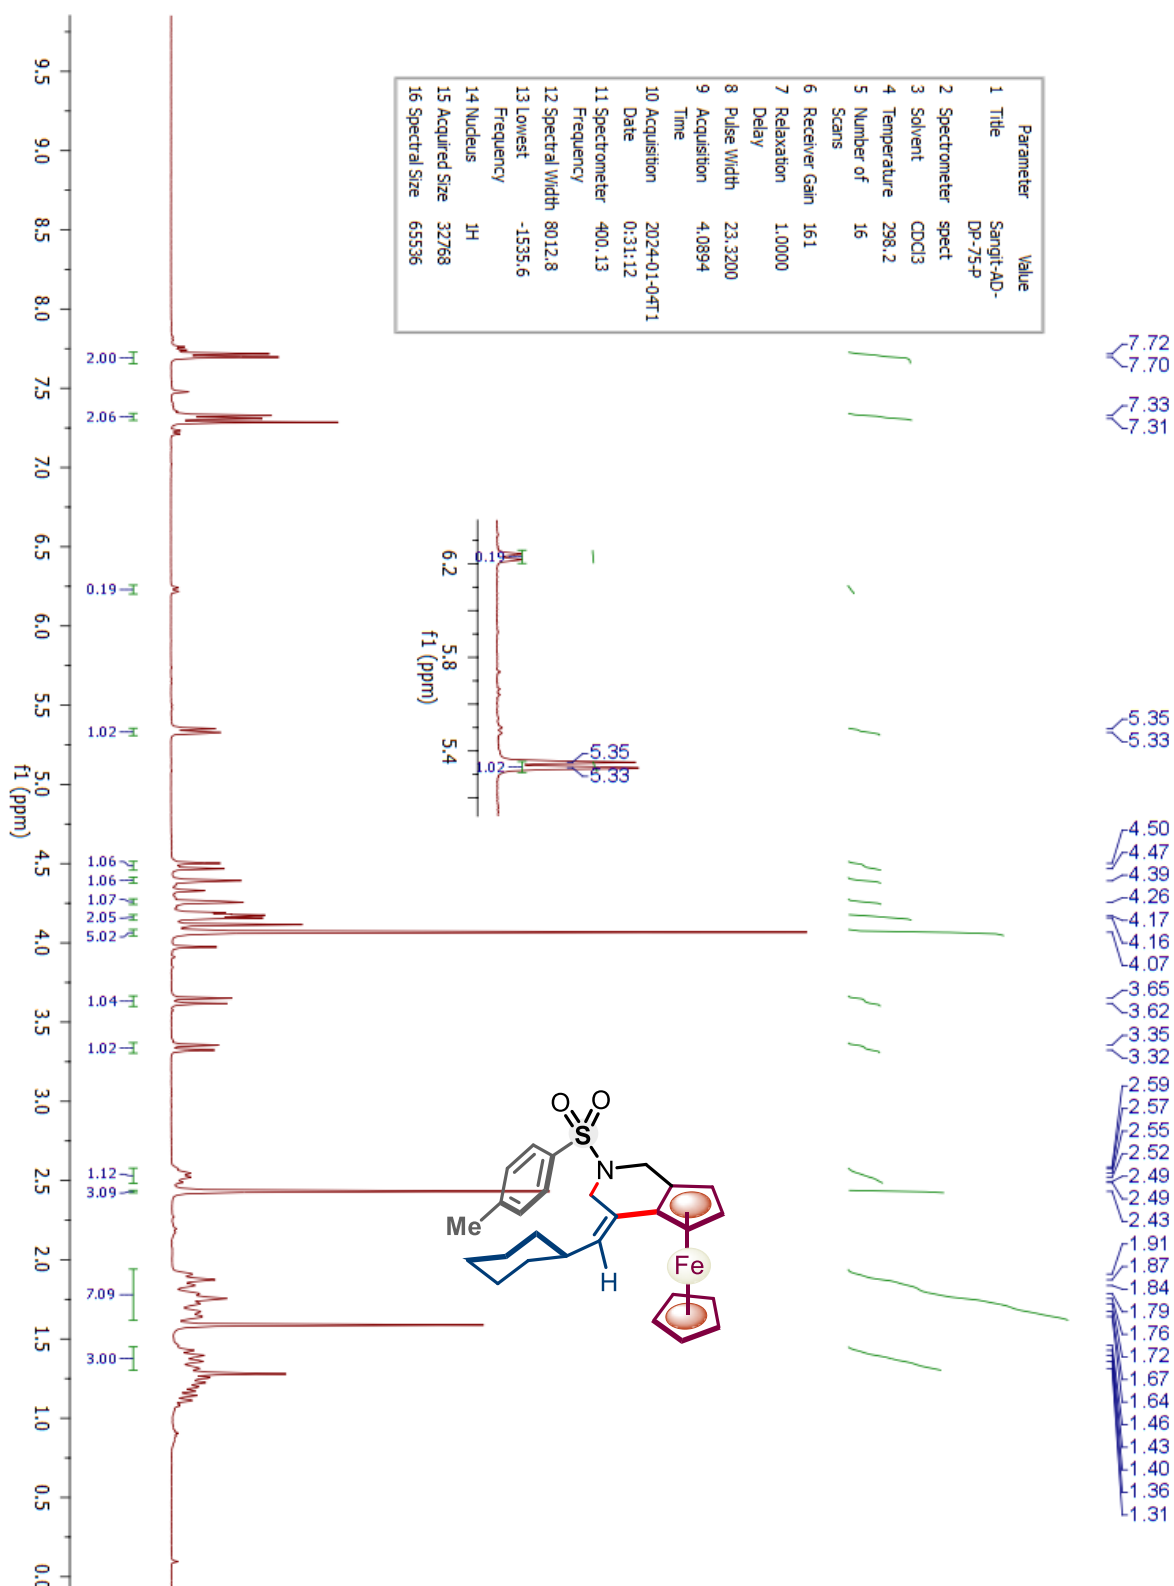

# $^{13}\text{C}\{^1\text{H}\}$ NMR Spectrum of **30**

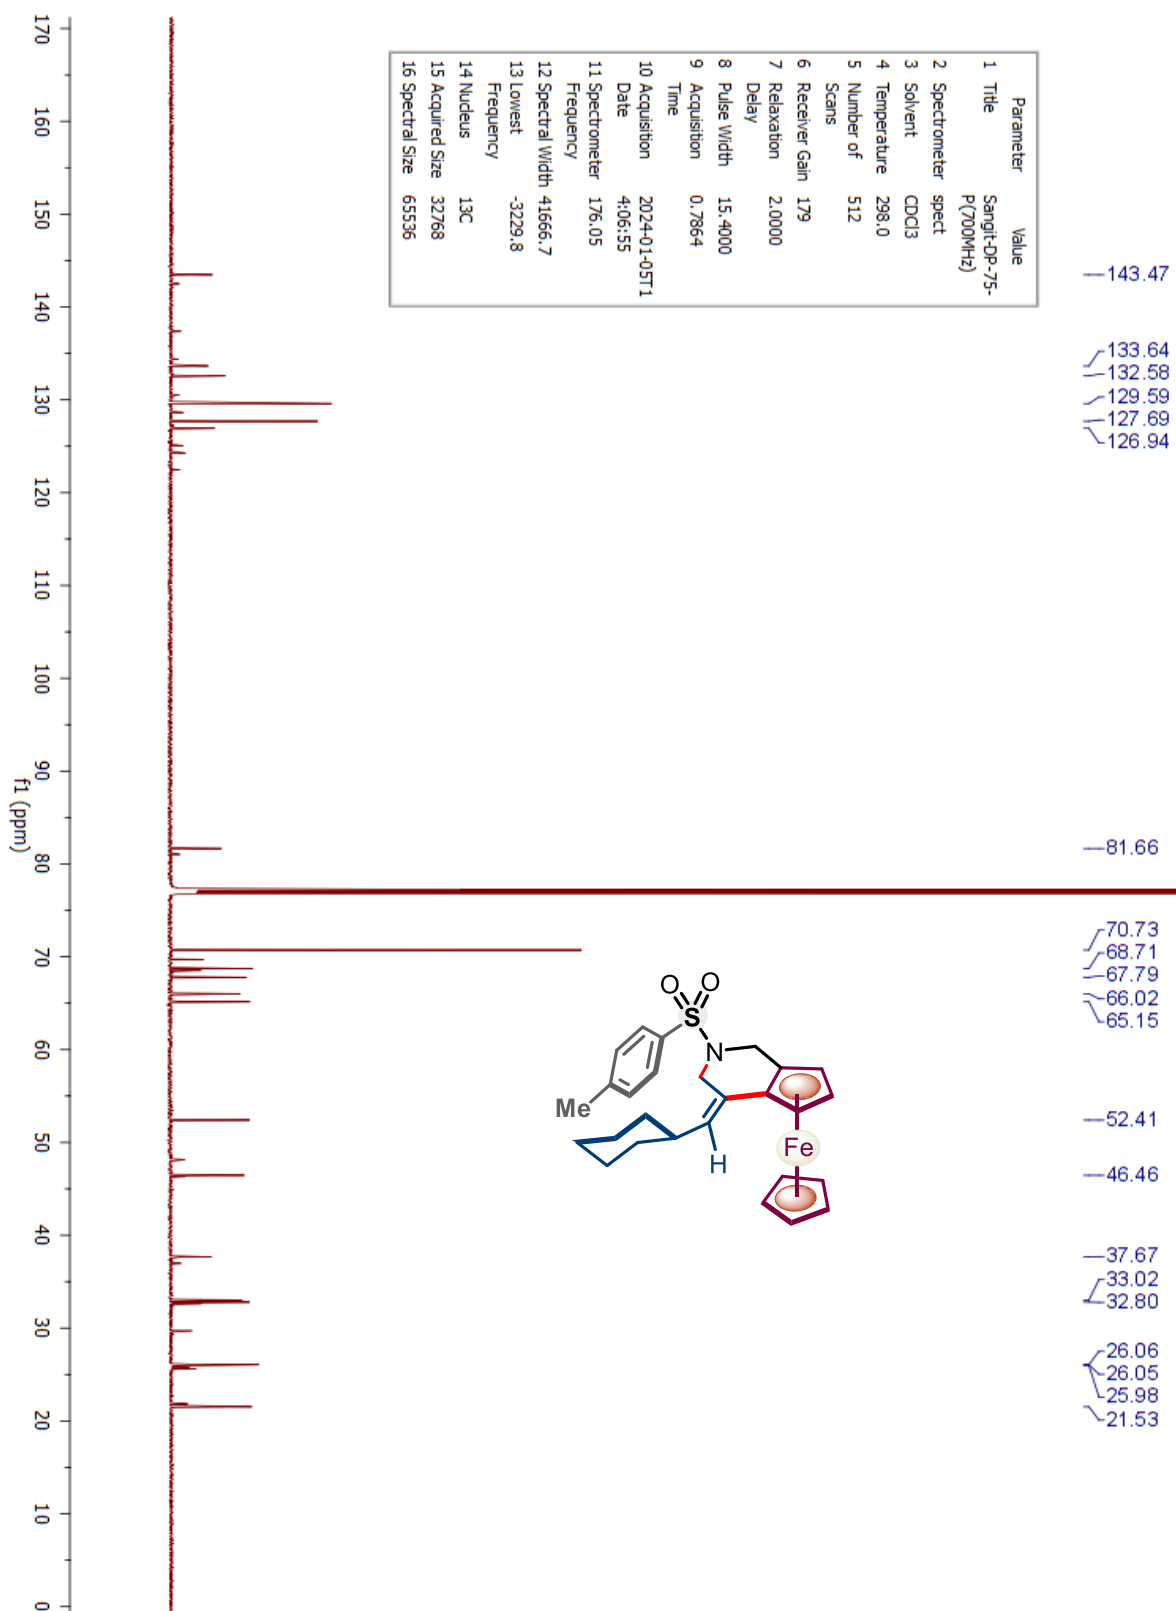

<sup>1</sup>H NMR Spectrum of **3p**

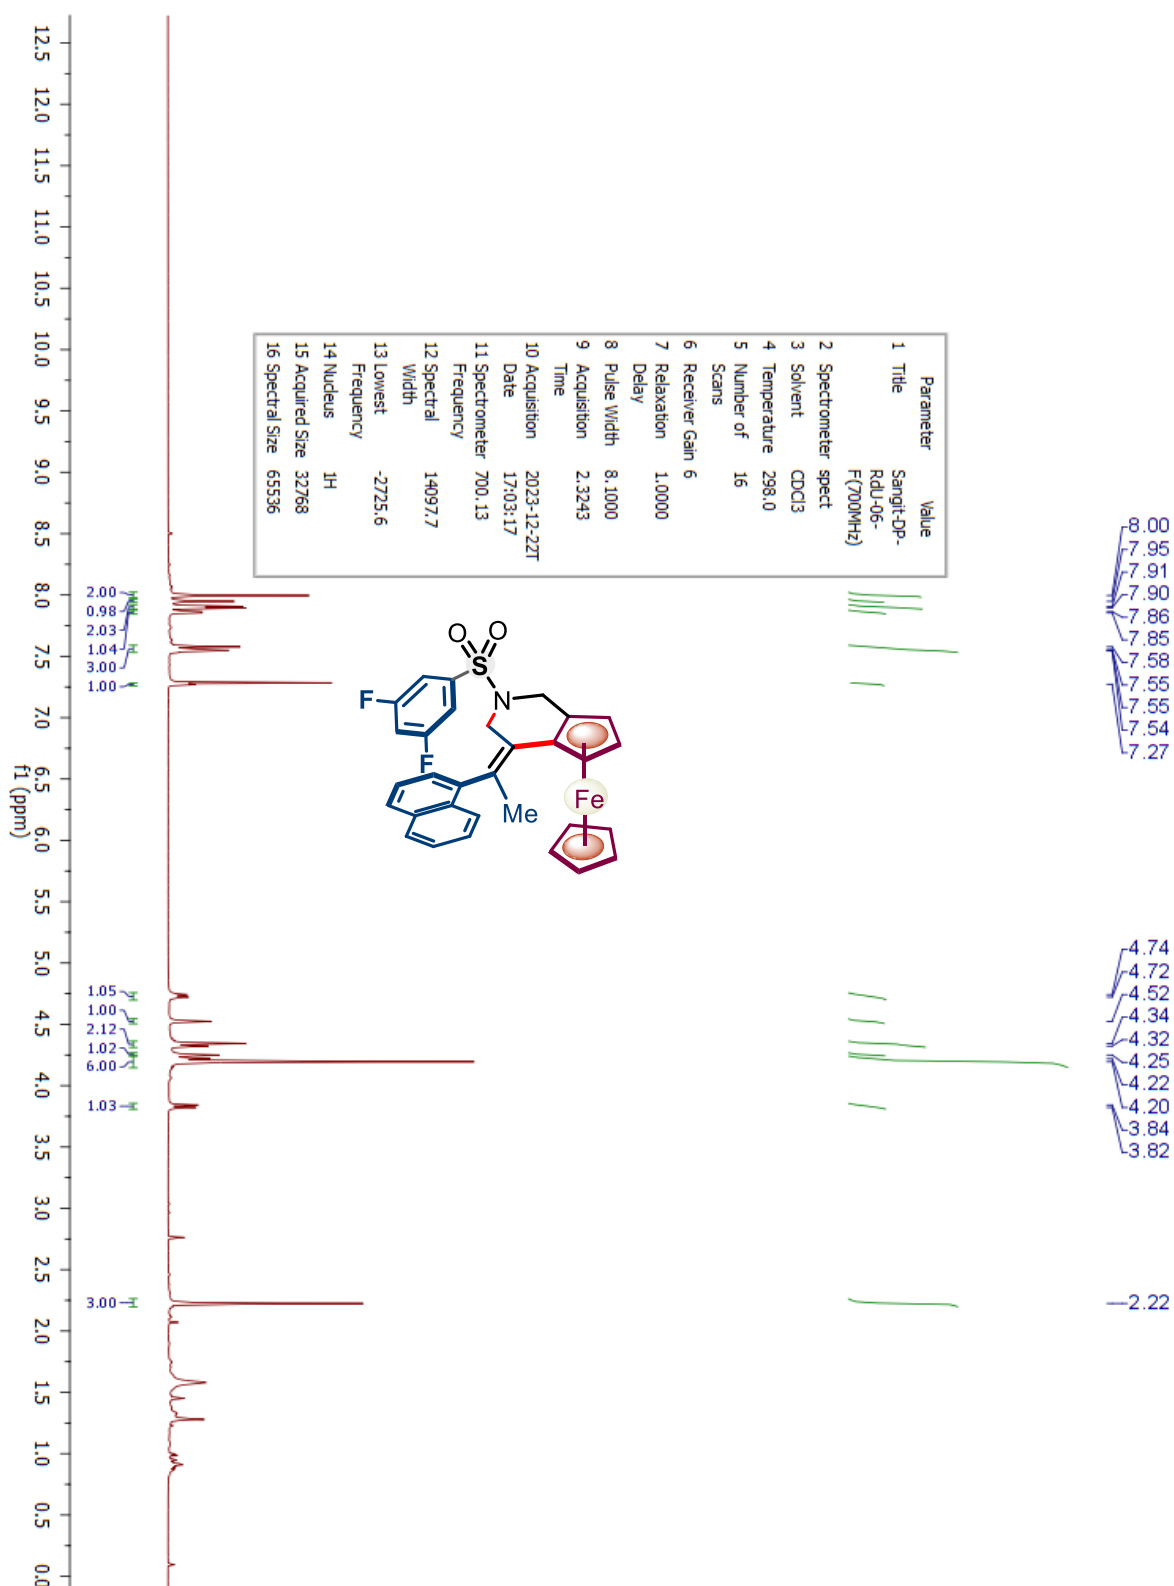

# $^{13}\text{C}\{^1\text{H}\}$ NMR Spectrum of **3p**

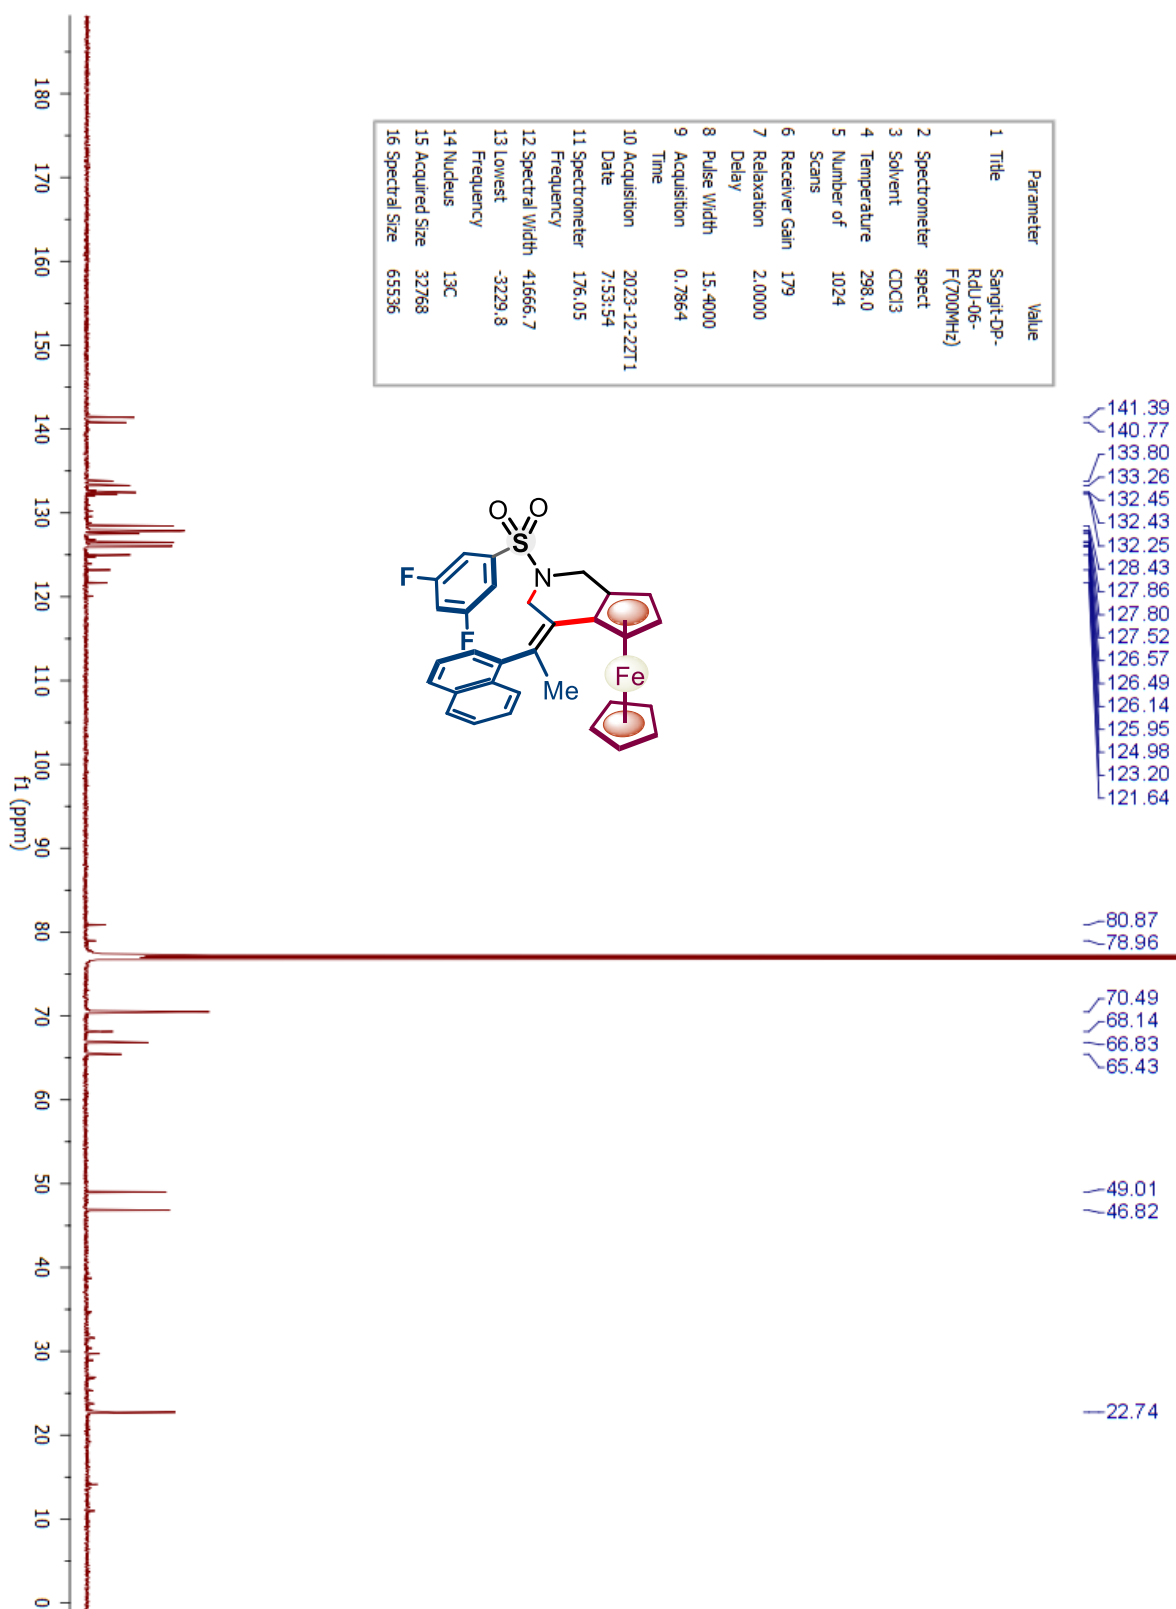



# <sup>19</sup>F NMR Spectrum of **3p**

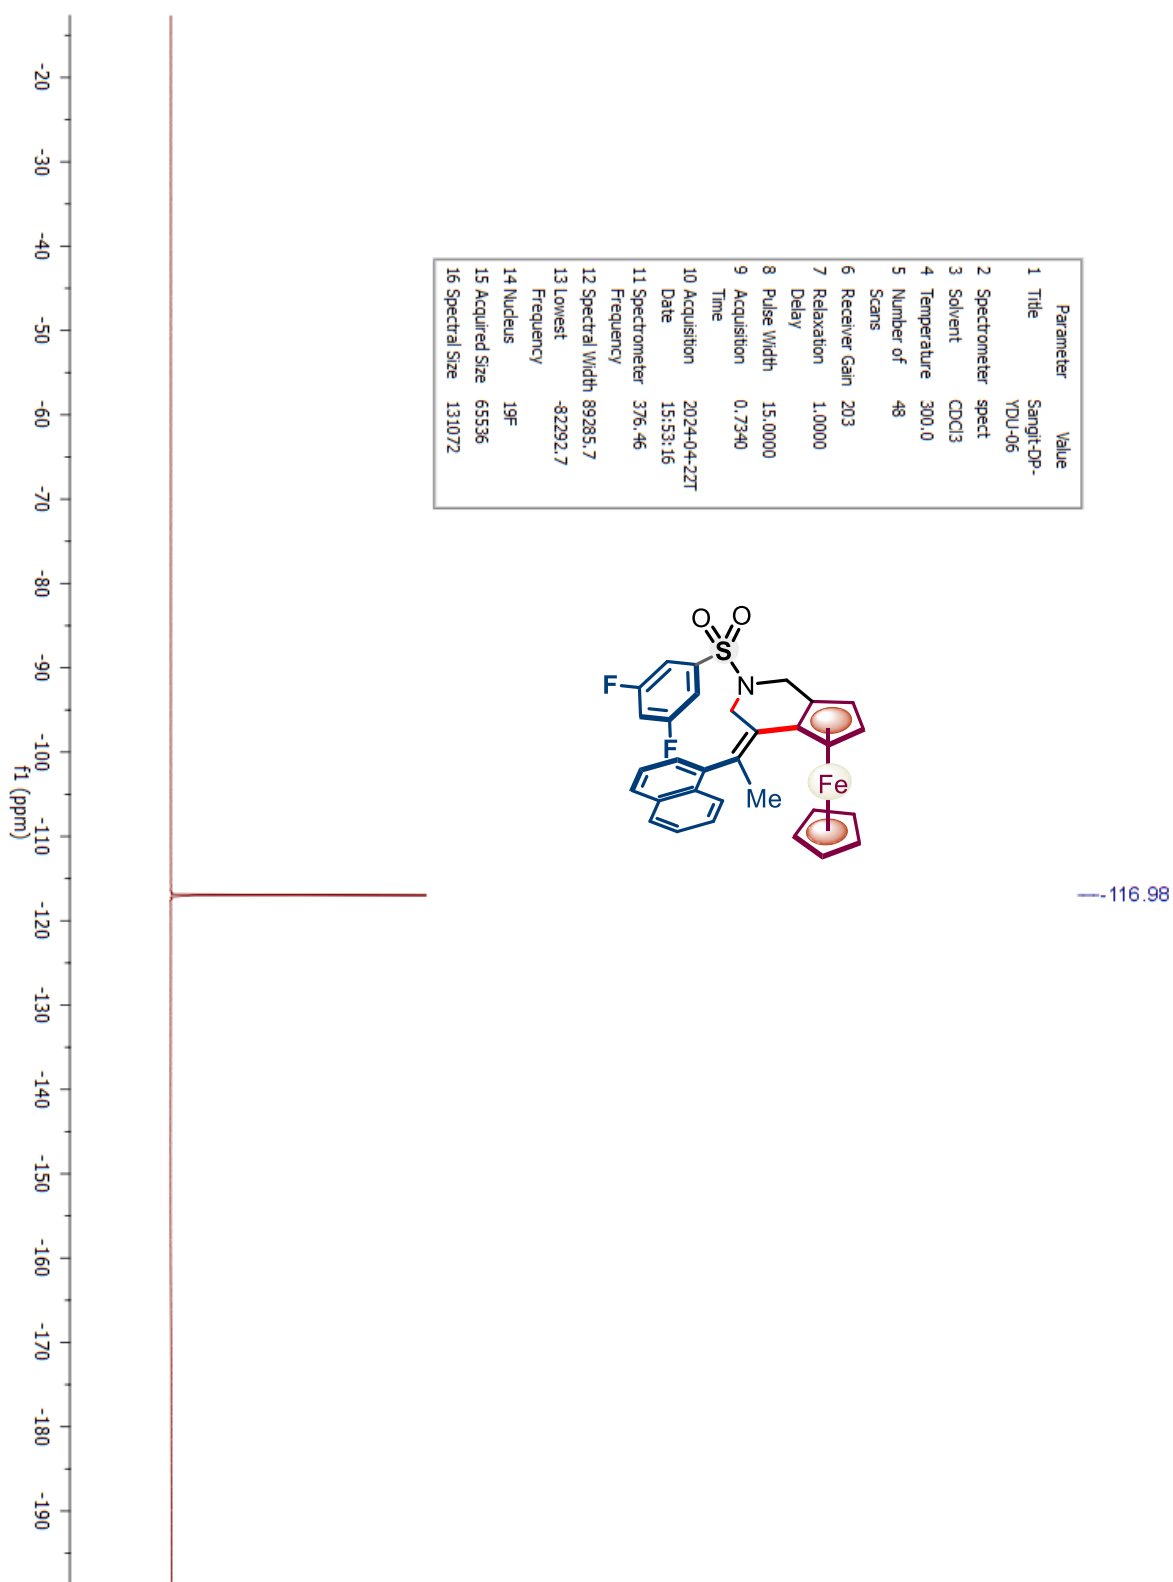

# <sup>1</sup>H NMR Spectrum of 3q

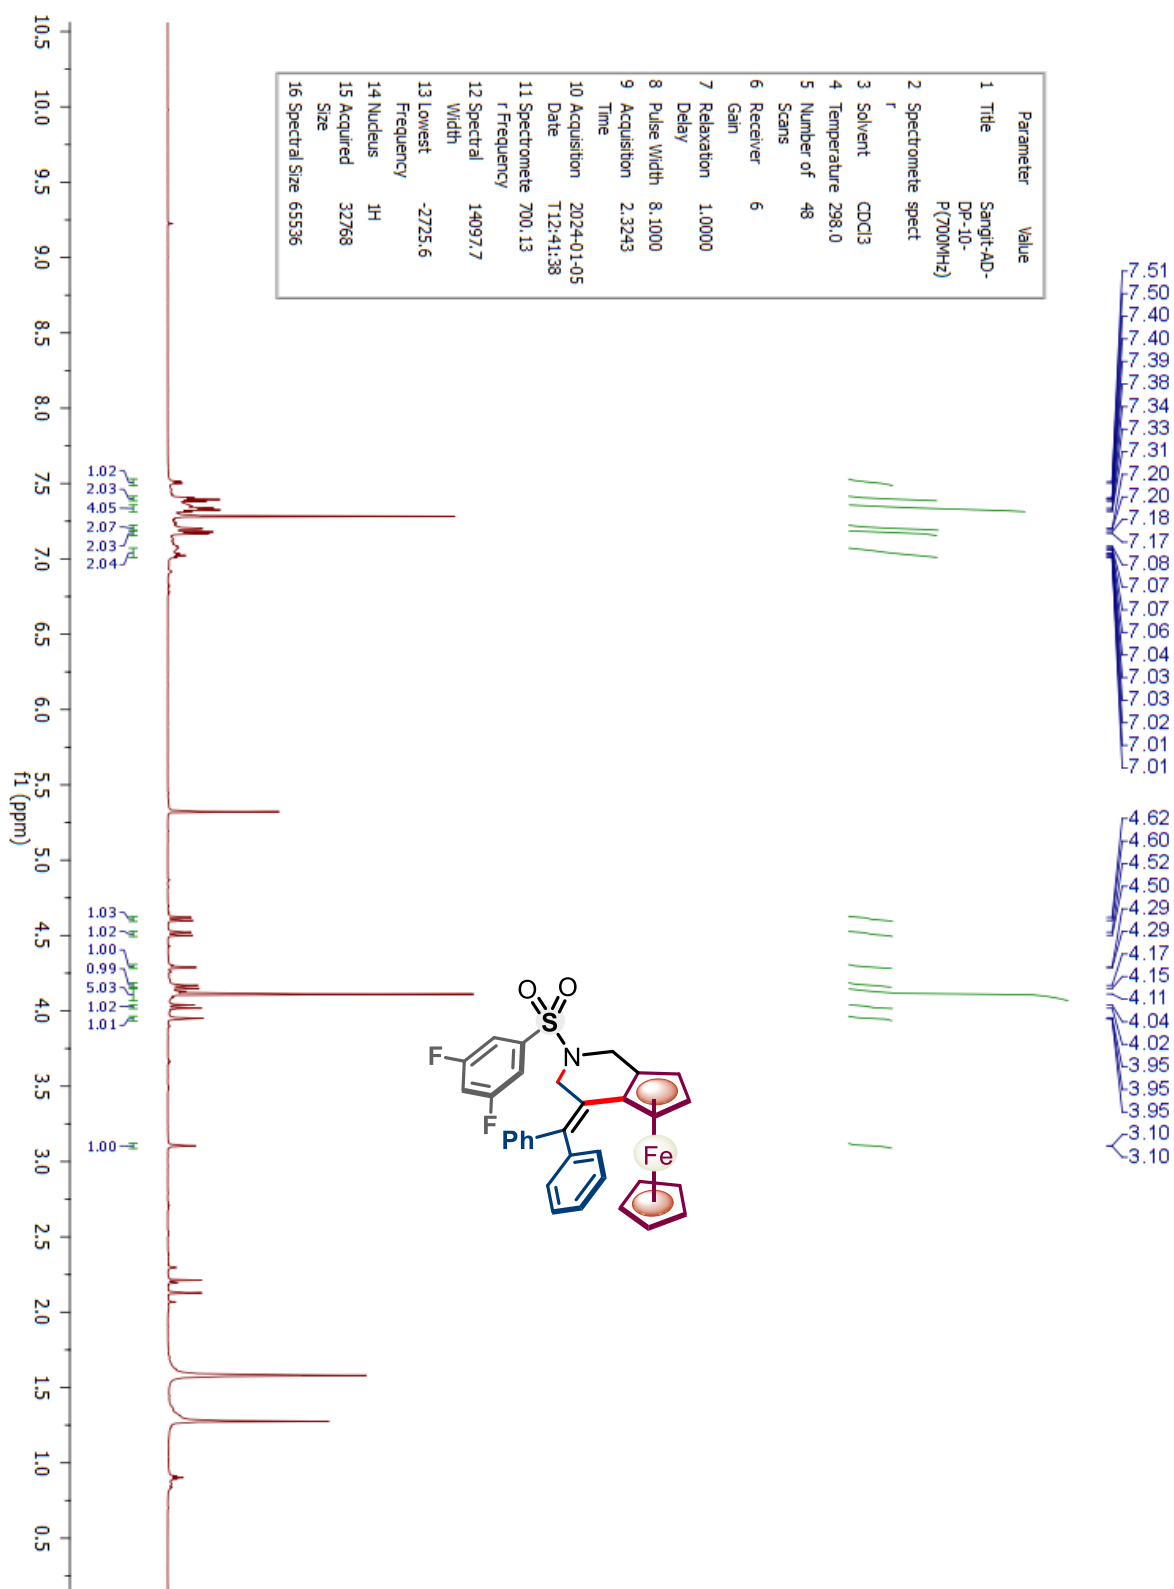

$^{13}\text{C}\{^1\text{H}\}$  NMR Spectrum of **3q**

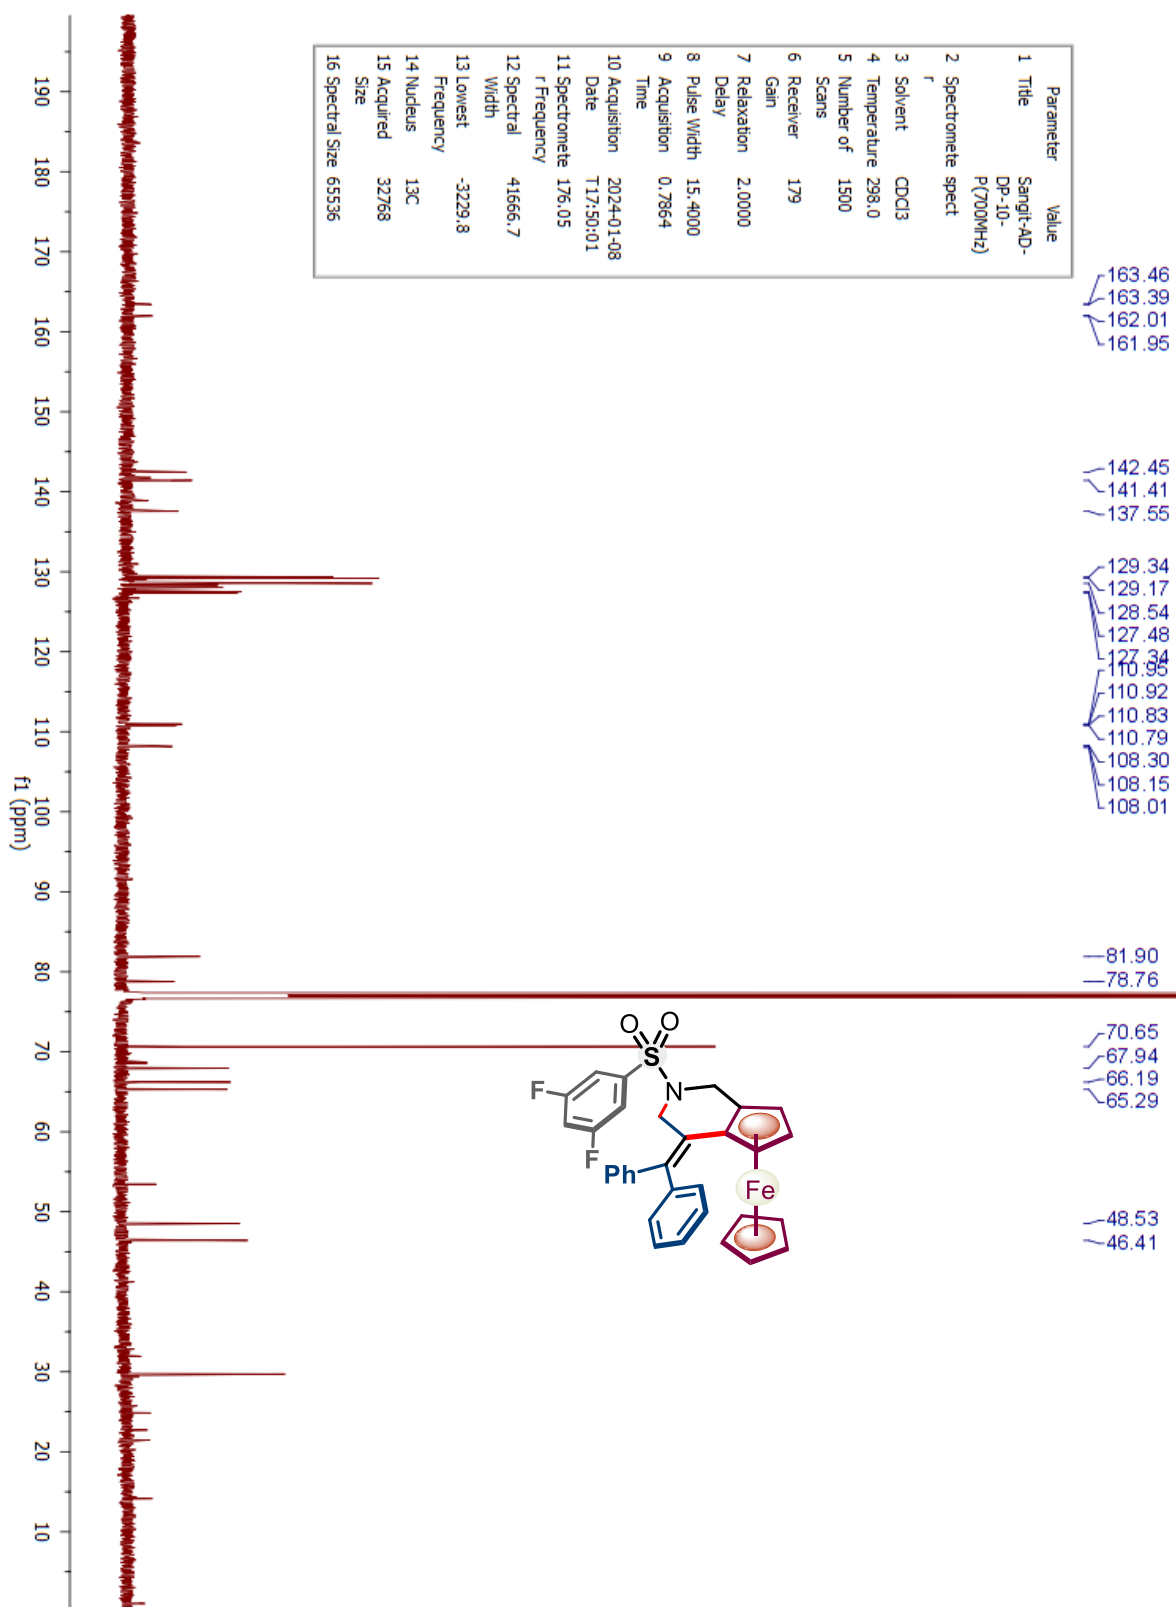

| Parameter                  | Value                             |
|----------------------------|-----------------------------------|
| 1 Title                    | Sangit-AD-<br>DP-10-<br>P(700MHz) |
| 2 Spectromete spect        | r                                 |
| 3 Solvent                  | CDCl3                             |
| 4 Temperature              | 298.0                             |
| 5 Number of Scans          | 1500                              |
| 6 Receiver                 | 179                               |
| 7 Gain                     |                                   |
| 7 Relaxation Delay         | 2.0000                            |
| 8 Pulse Width              | 15.4000                           |
| 9 Acquisition Time         | 0.7864                            |
| 10 Acquisition Date        | 2024-01-08<br>11:50:01            |
| 11 Spectromete r Frequency | 176.05                            |
| 12 Spectral Width          | 41666.7                           |
| 13 Lowest Frequency        | -3229.8                           |
| 14 Nucleus                 | $^{13}\text{C}$                   |
| 15 Acquired Size           | 32768                             |
| 16 Spectral Size           | 65536                             |

- 163.46
- 163.39
- 162.01
- 161.95
- 142.45
- 141.41
- 137.55
- 129.34
- 129.17
- 128.54
- 127.48
- 127.34
- 120.95
- 110.92
- 110.83
- 110.79
- 108.30
- 108.15
- 108.01
- 81.90
- 78.76
- 70.65
- 67.94
- 66.19
- 65.29
- 48.53
- 46.41

<sup>19</sup>F NMR Spectrum of **3q**

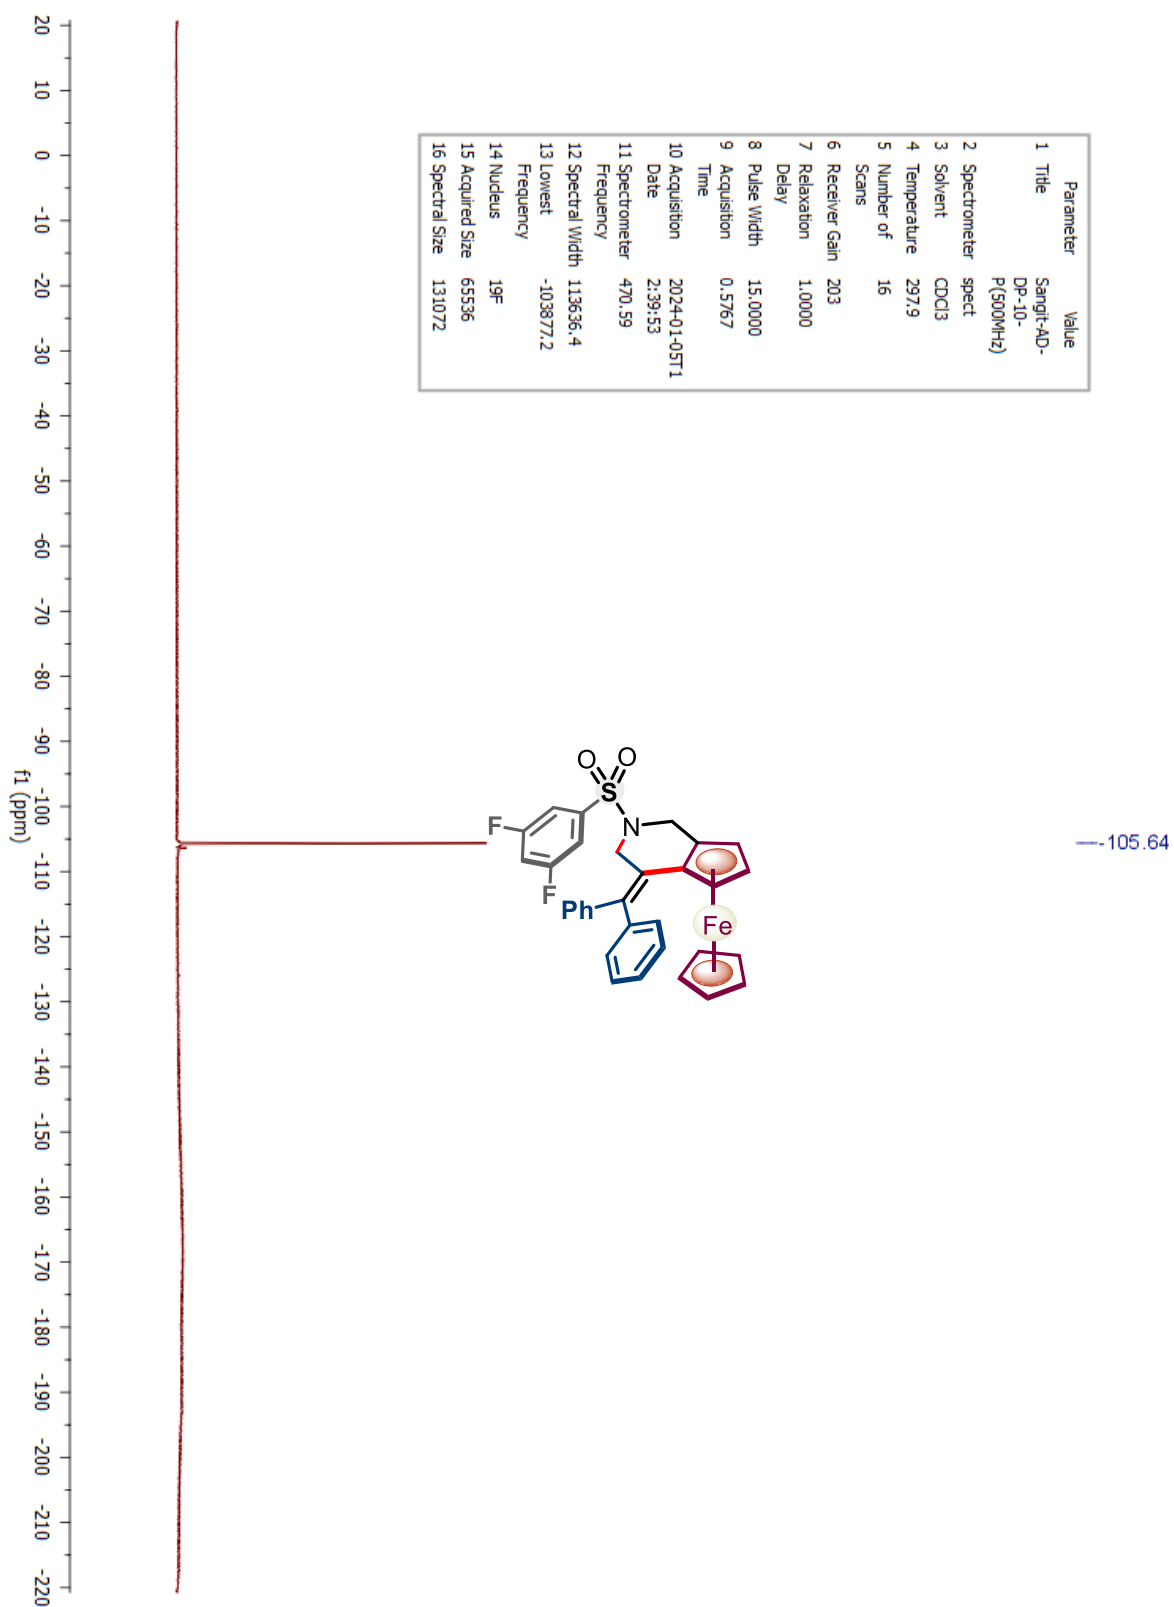

<sup>1</sup>H NMR Spectrum of **3r**

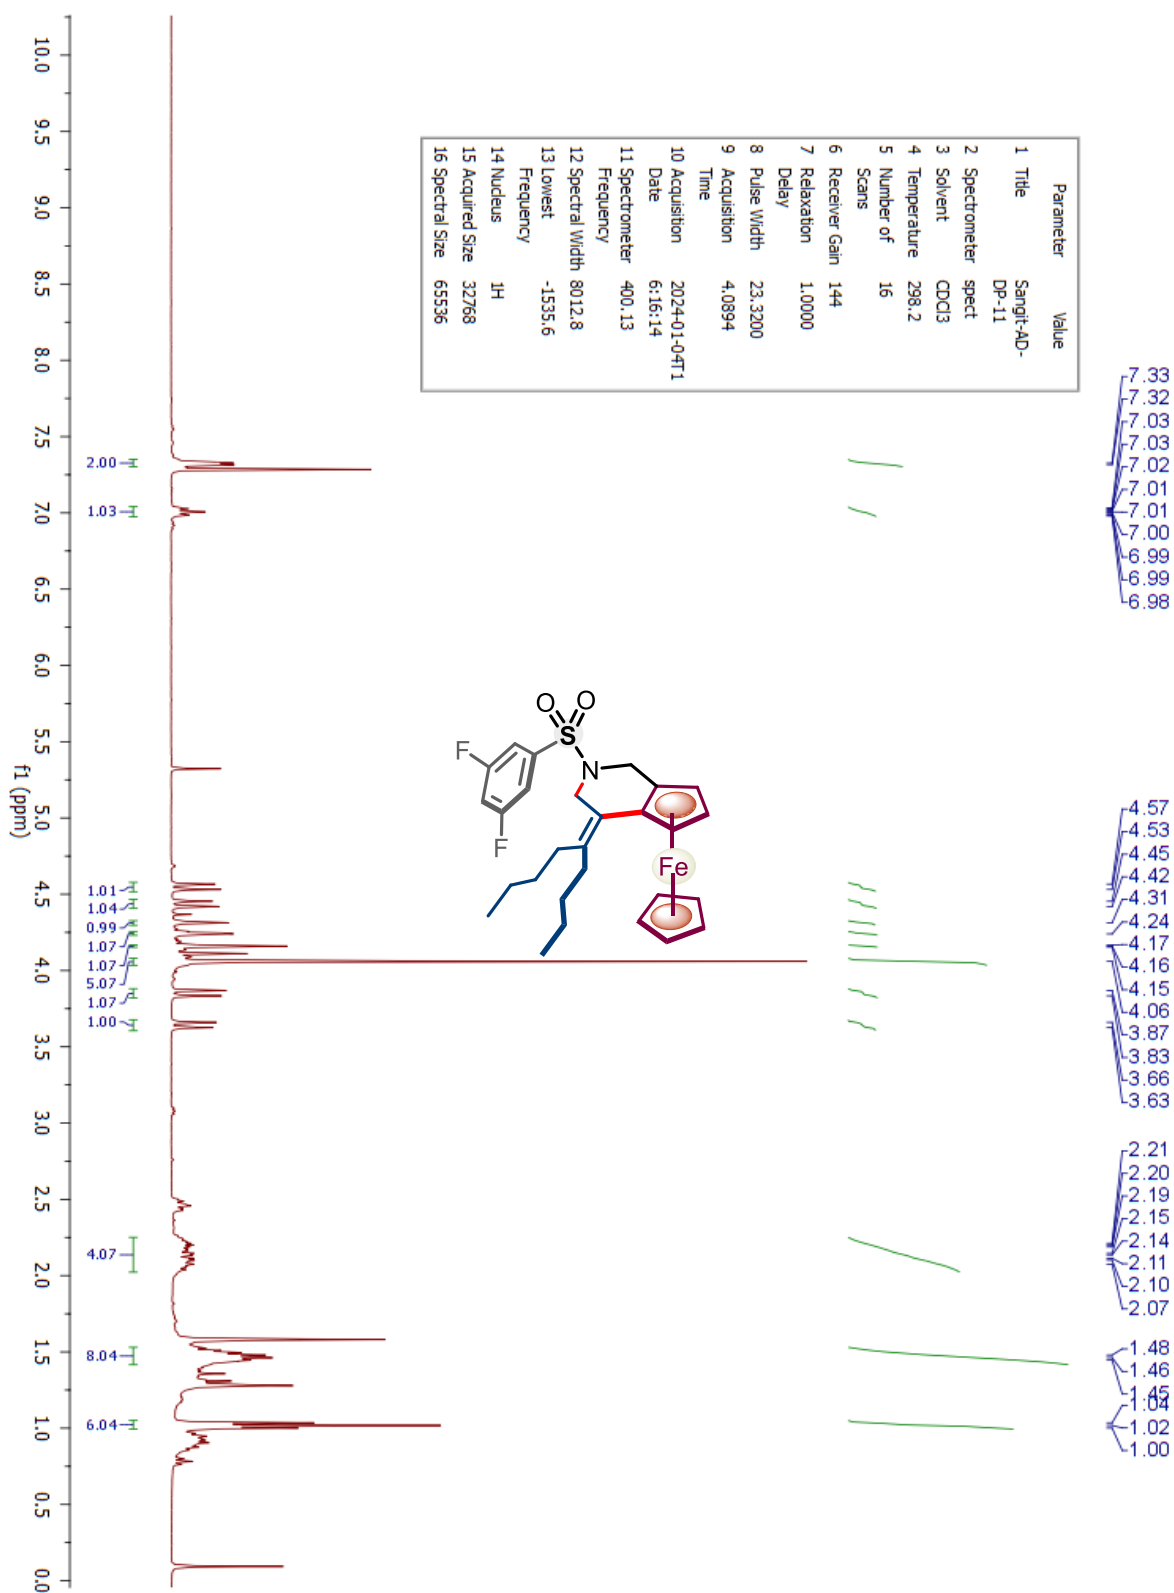

# $^{13}\text{C}\{^1\text{H}\}$ NMR Spectrum of **3r**

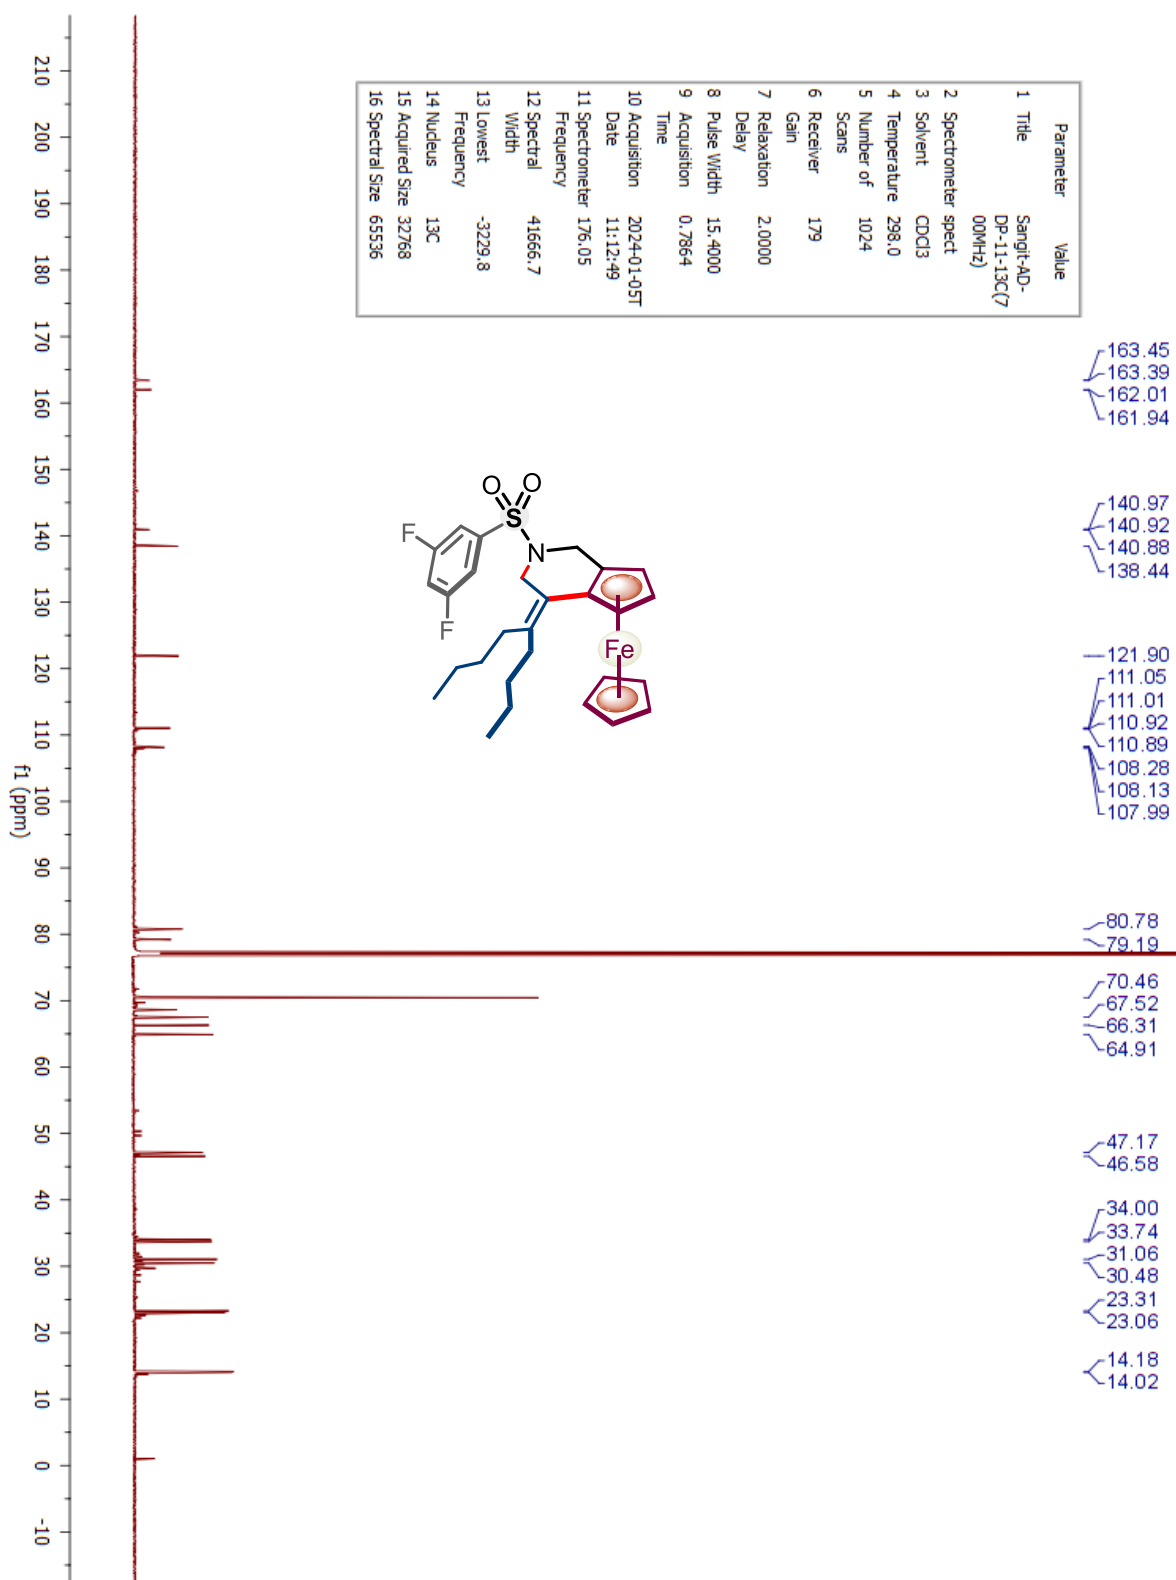

<sup>19</sup>F NMR Spectrum of **3r**

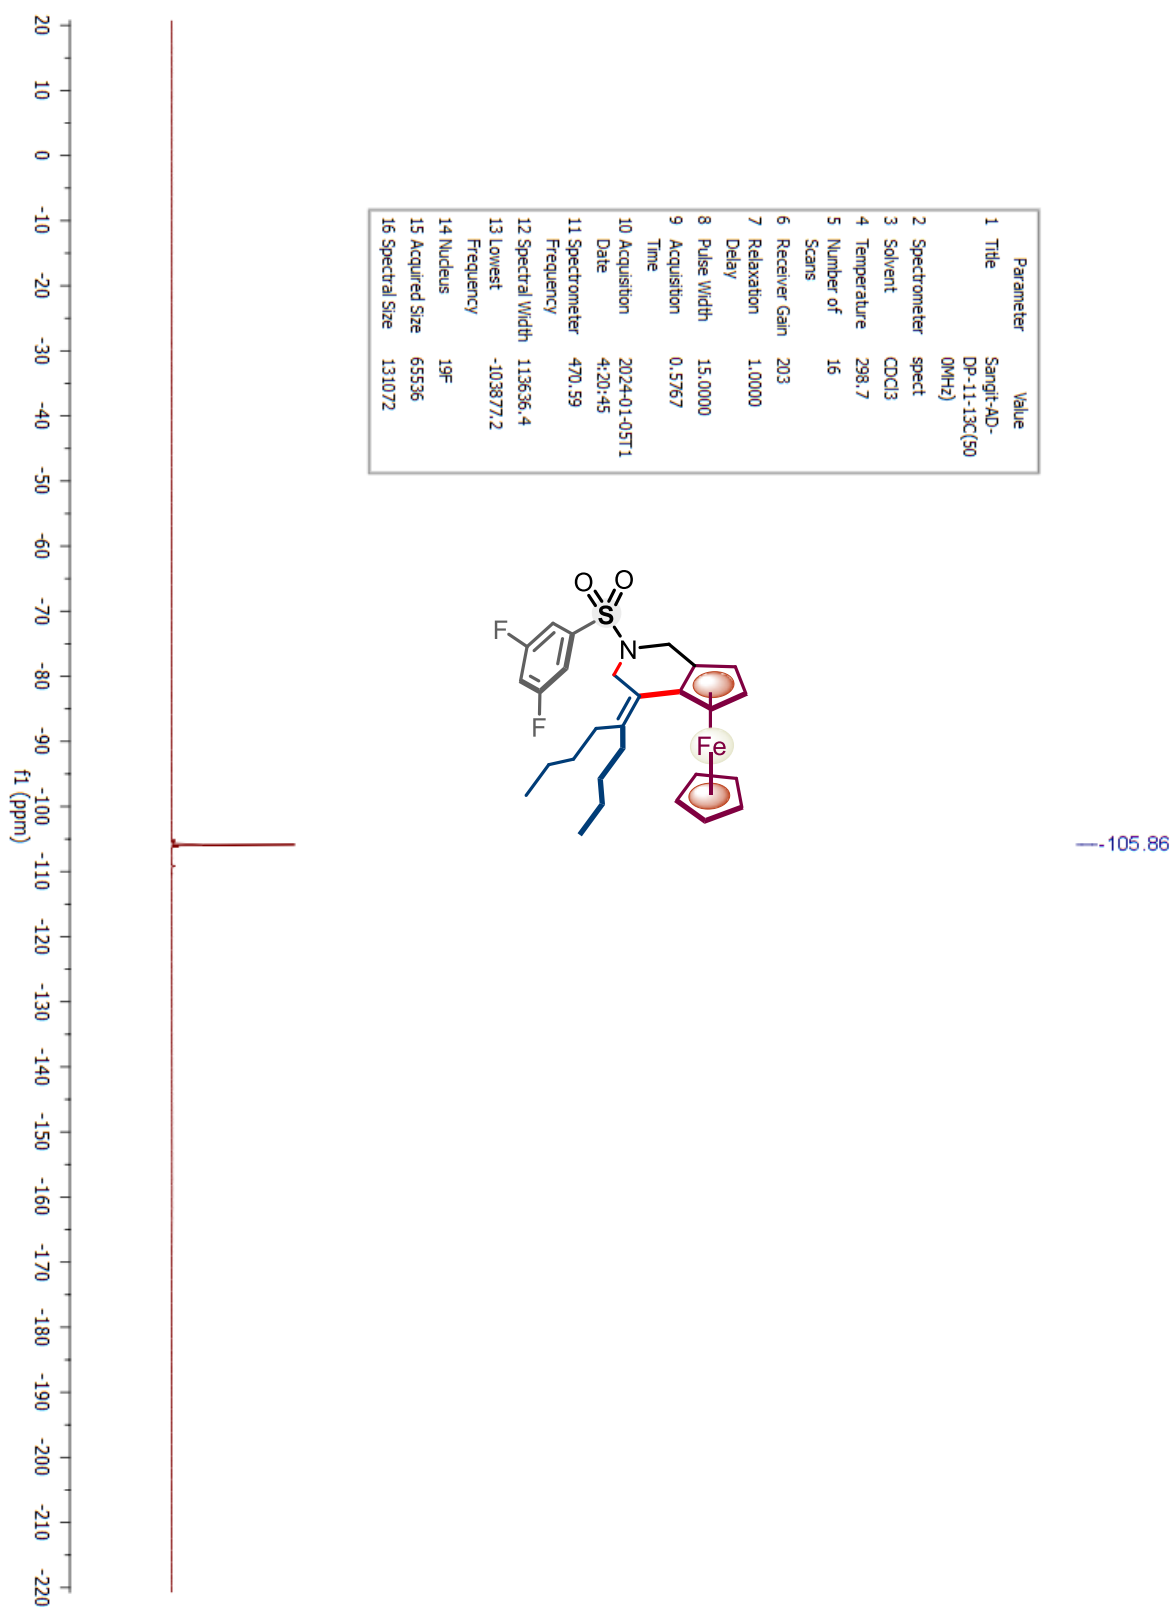

# <sup>1</sup>H NMR Spectrum of 3s

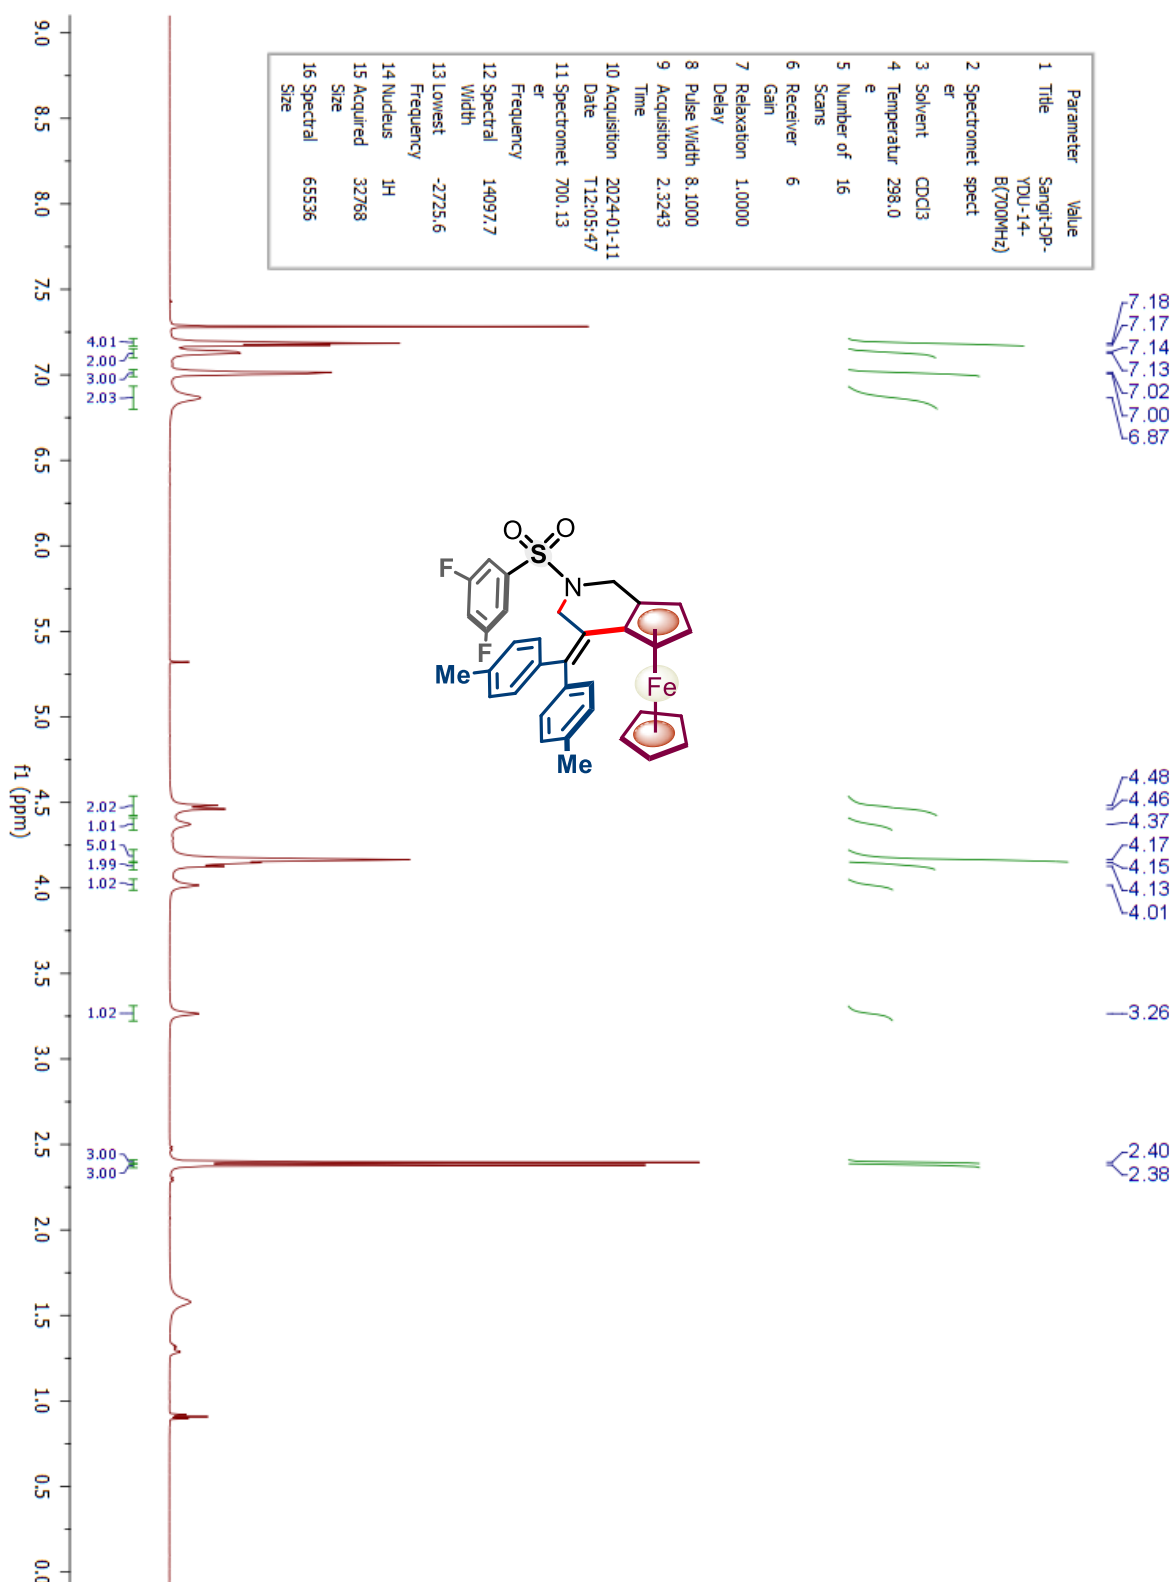



$^{13}\text{C}\{^1\text{H}\}$  NMR Spectrum of **3s**

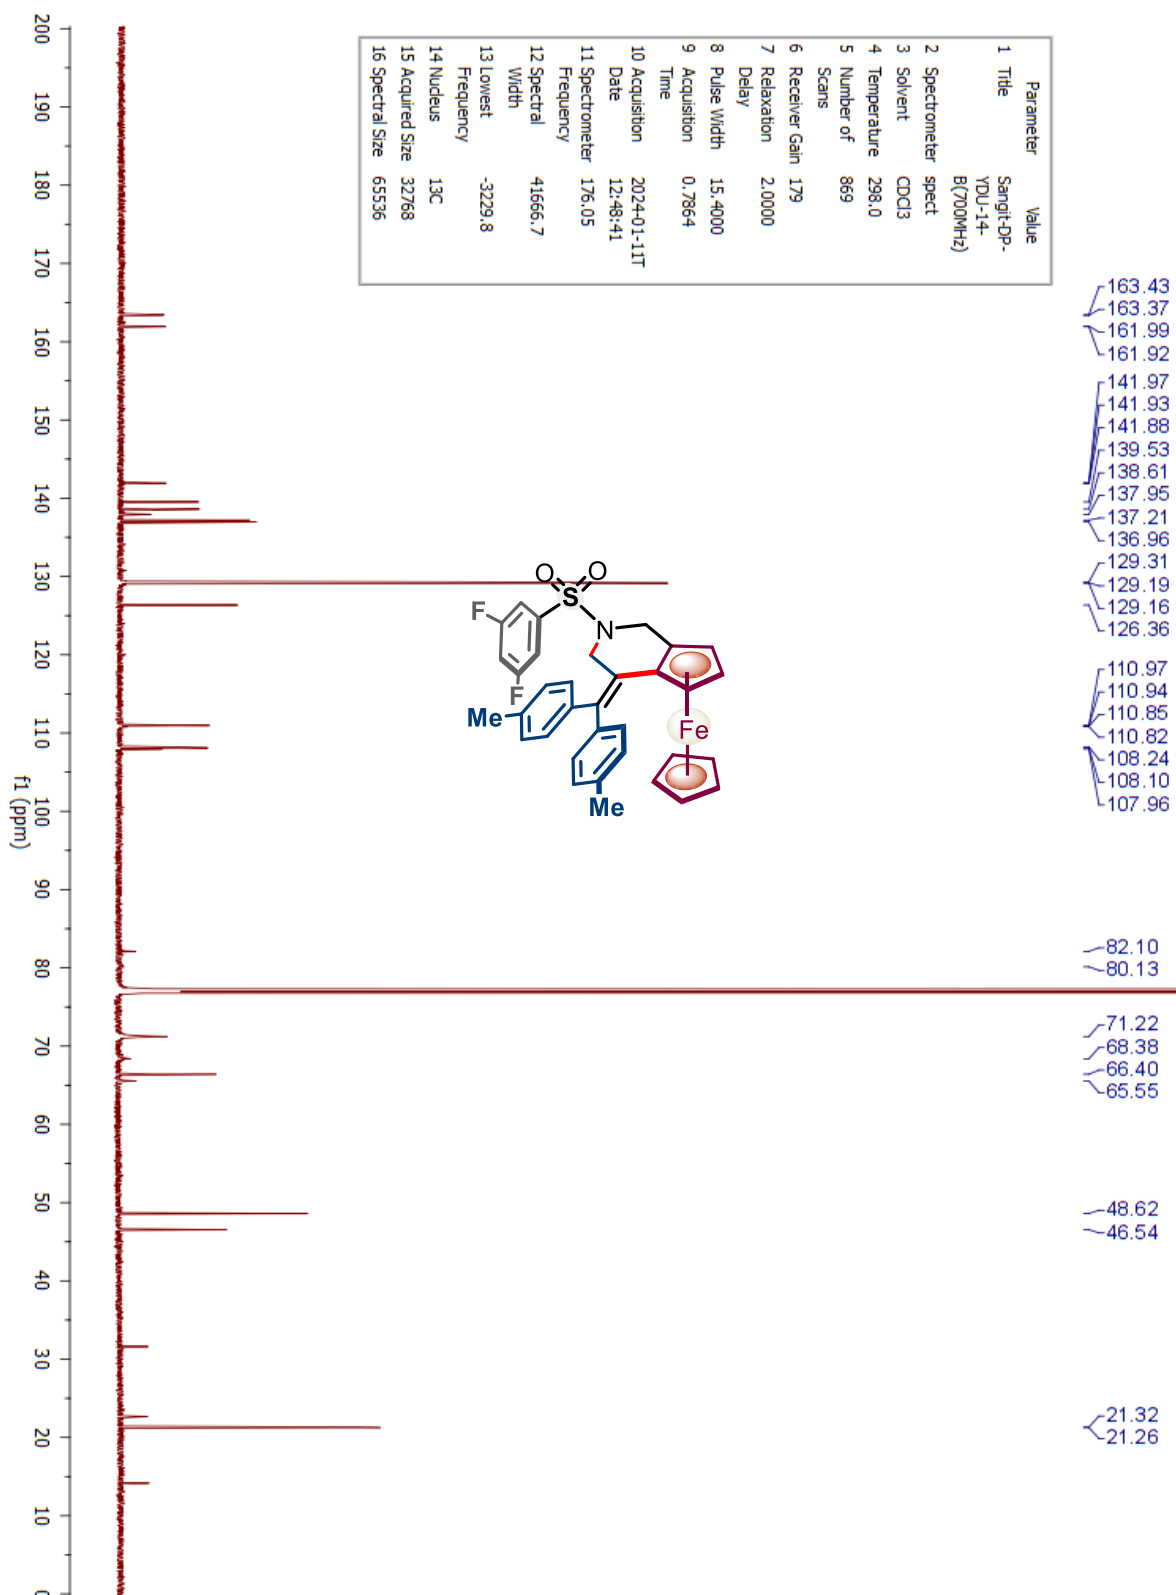

# <sup>19</sup>F NMR Spectrum of **3s**

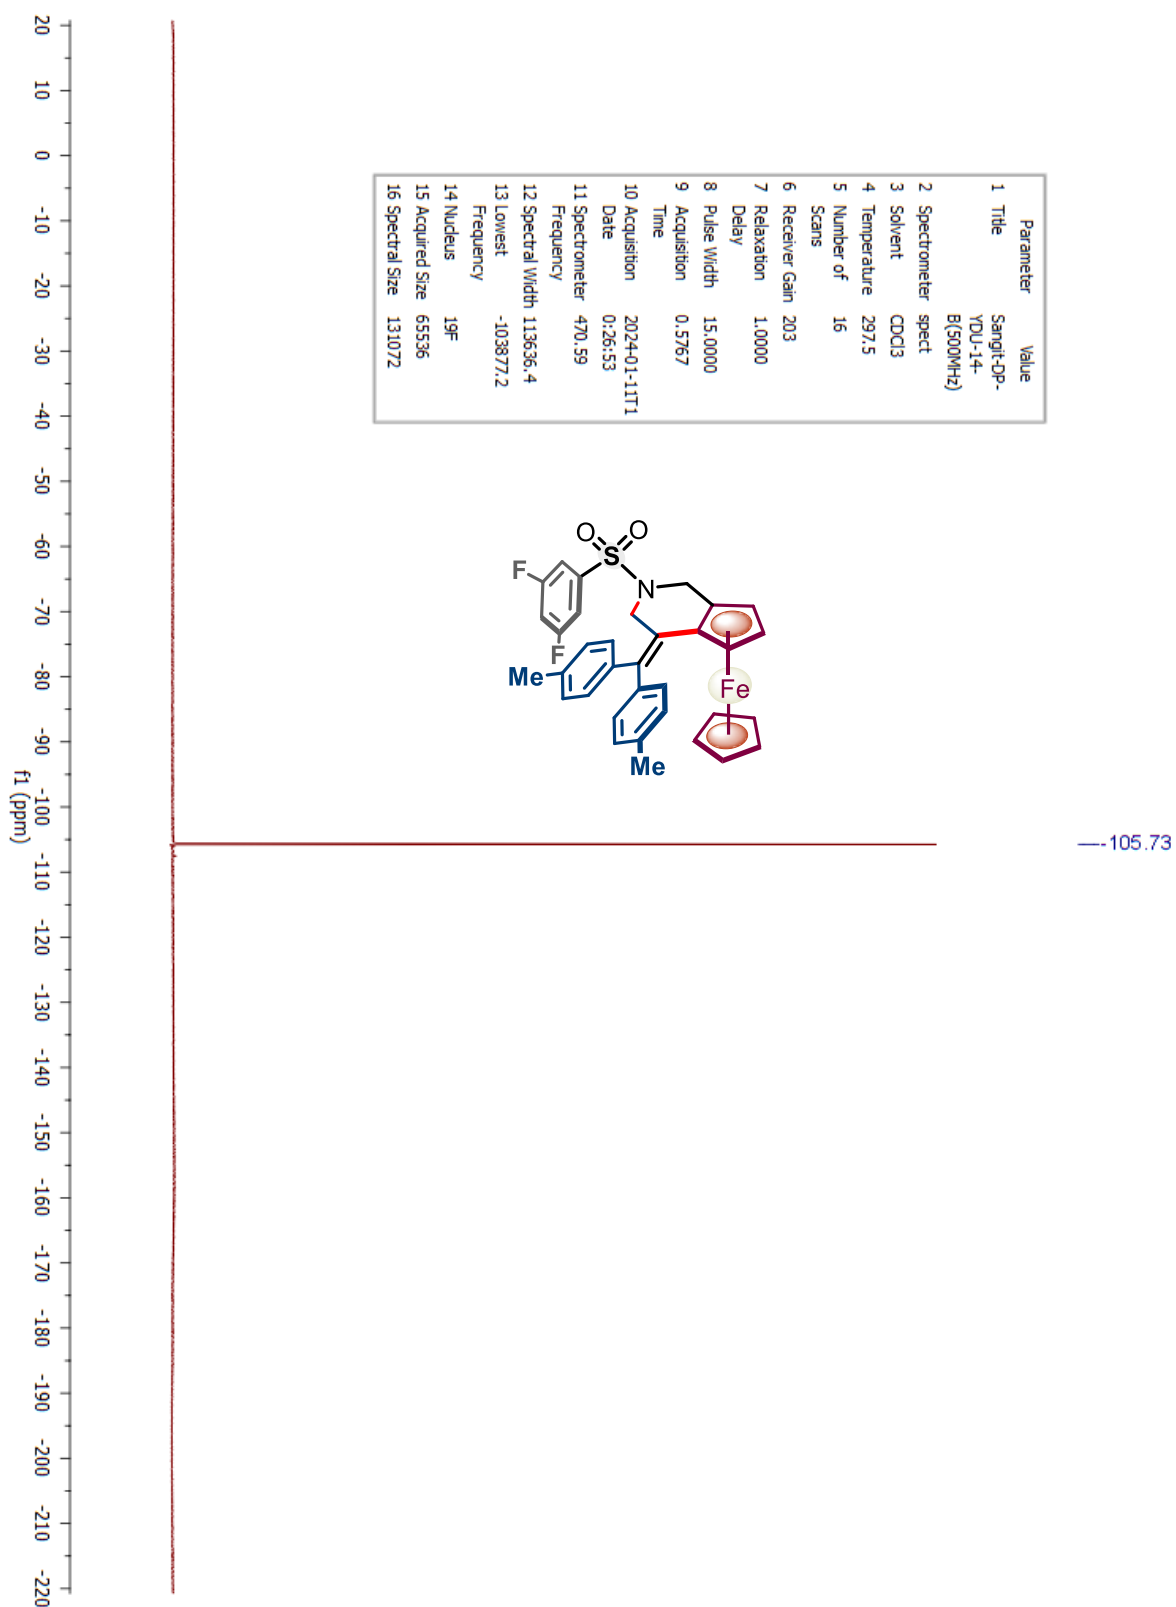

<sup>1</sup>H NMR Spectrum of **3t**

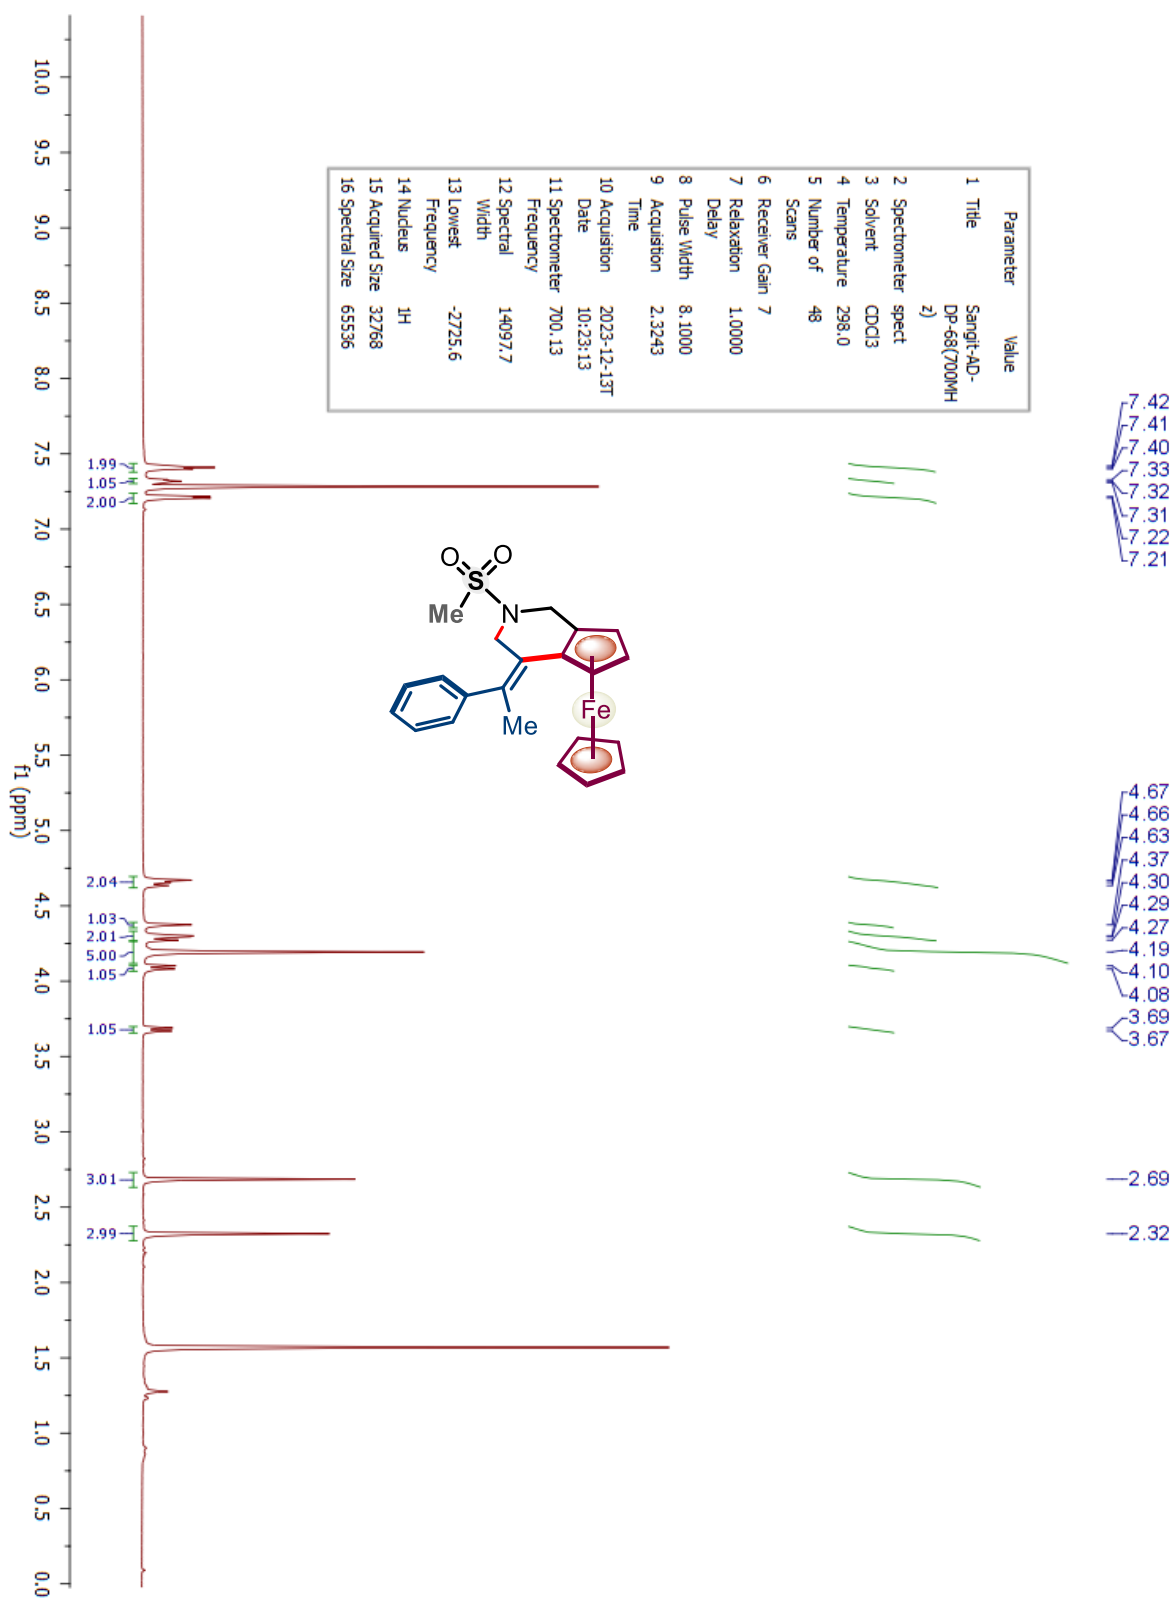

# $^{13}\text{C}\{^1\text{H}\}$ NMR Spectrum of **3t**

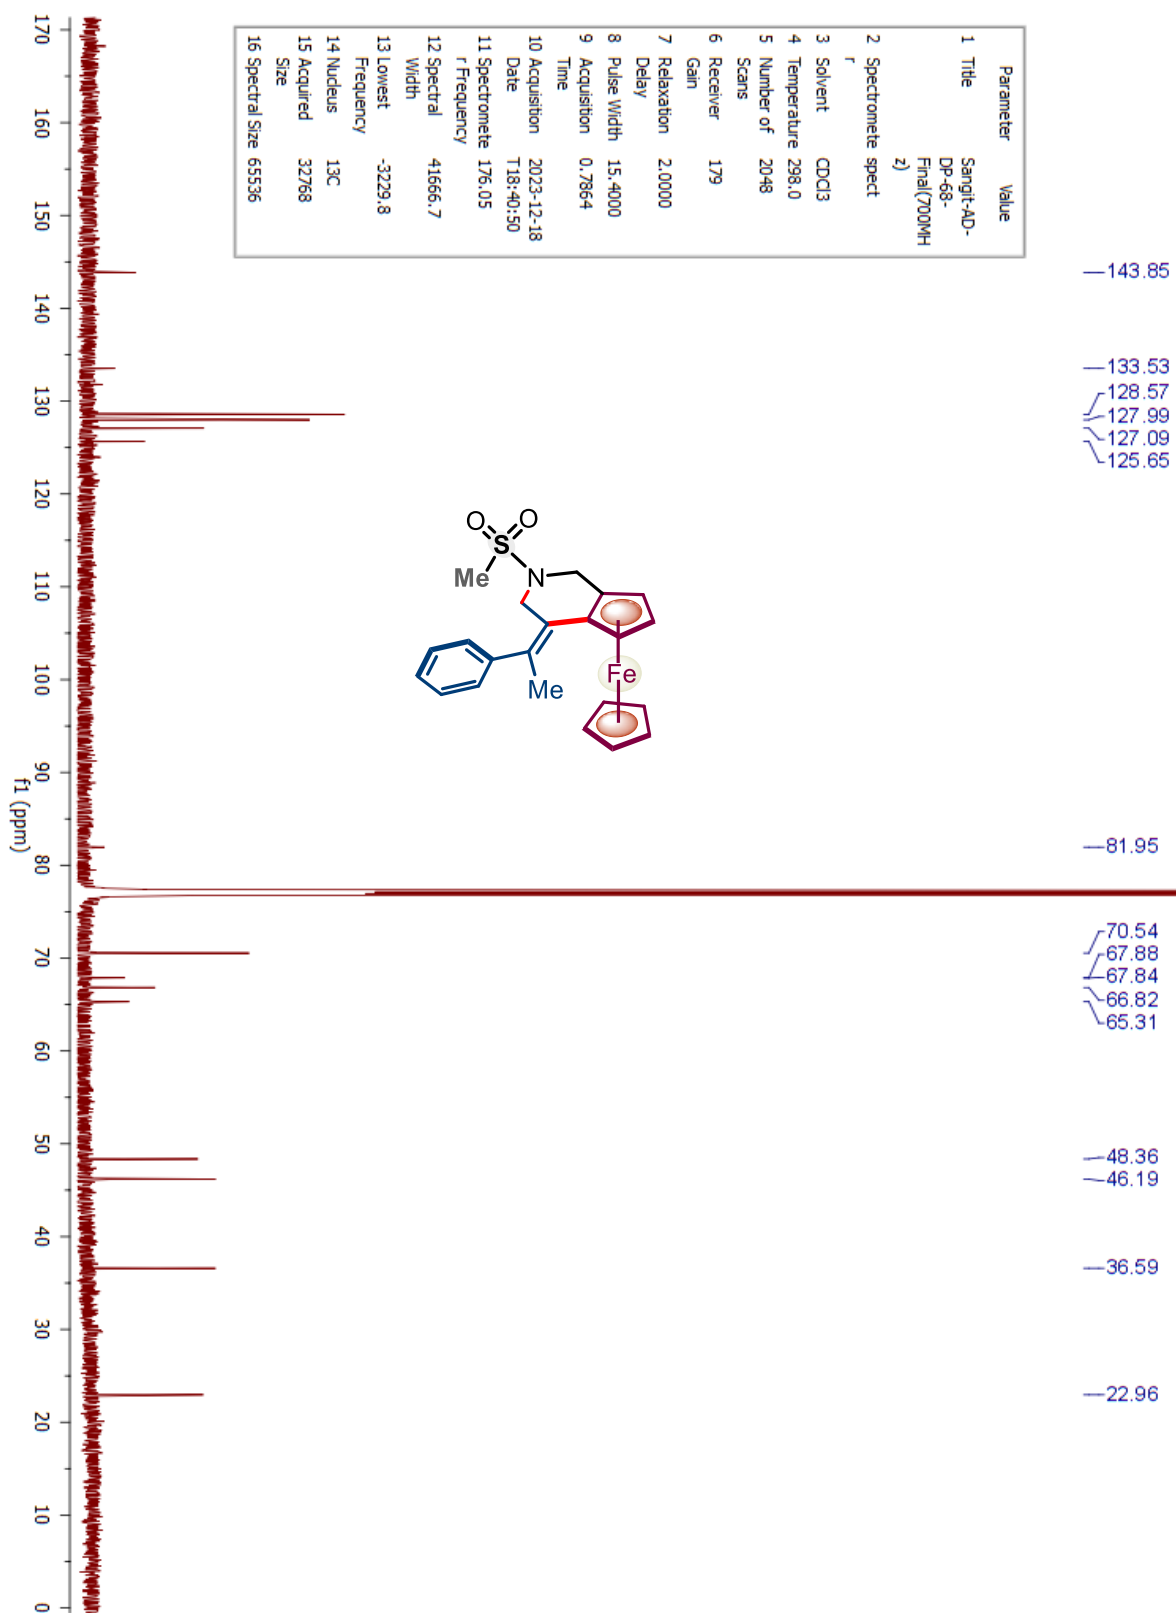

<sup>1</sup>H NMR Spectrum of **3u**

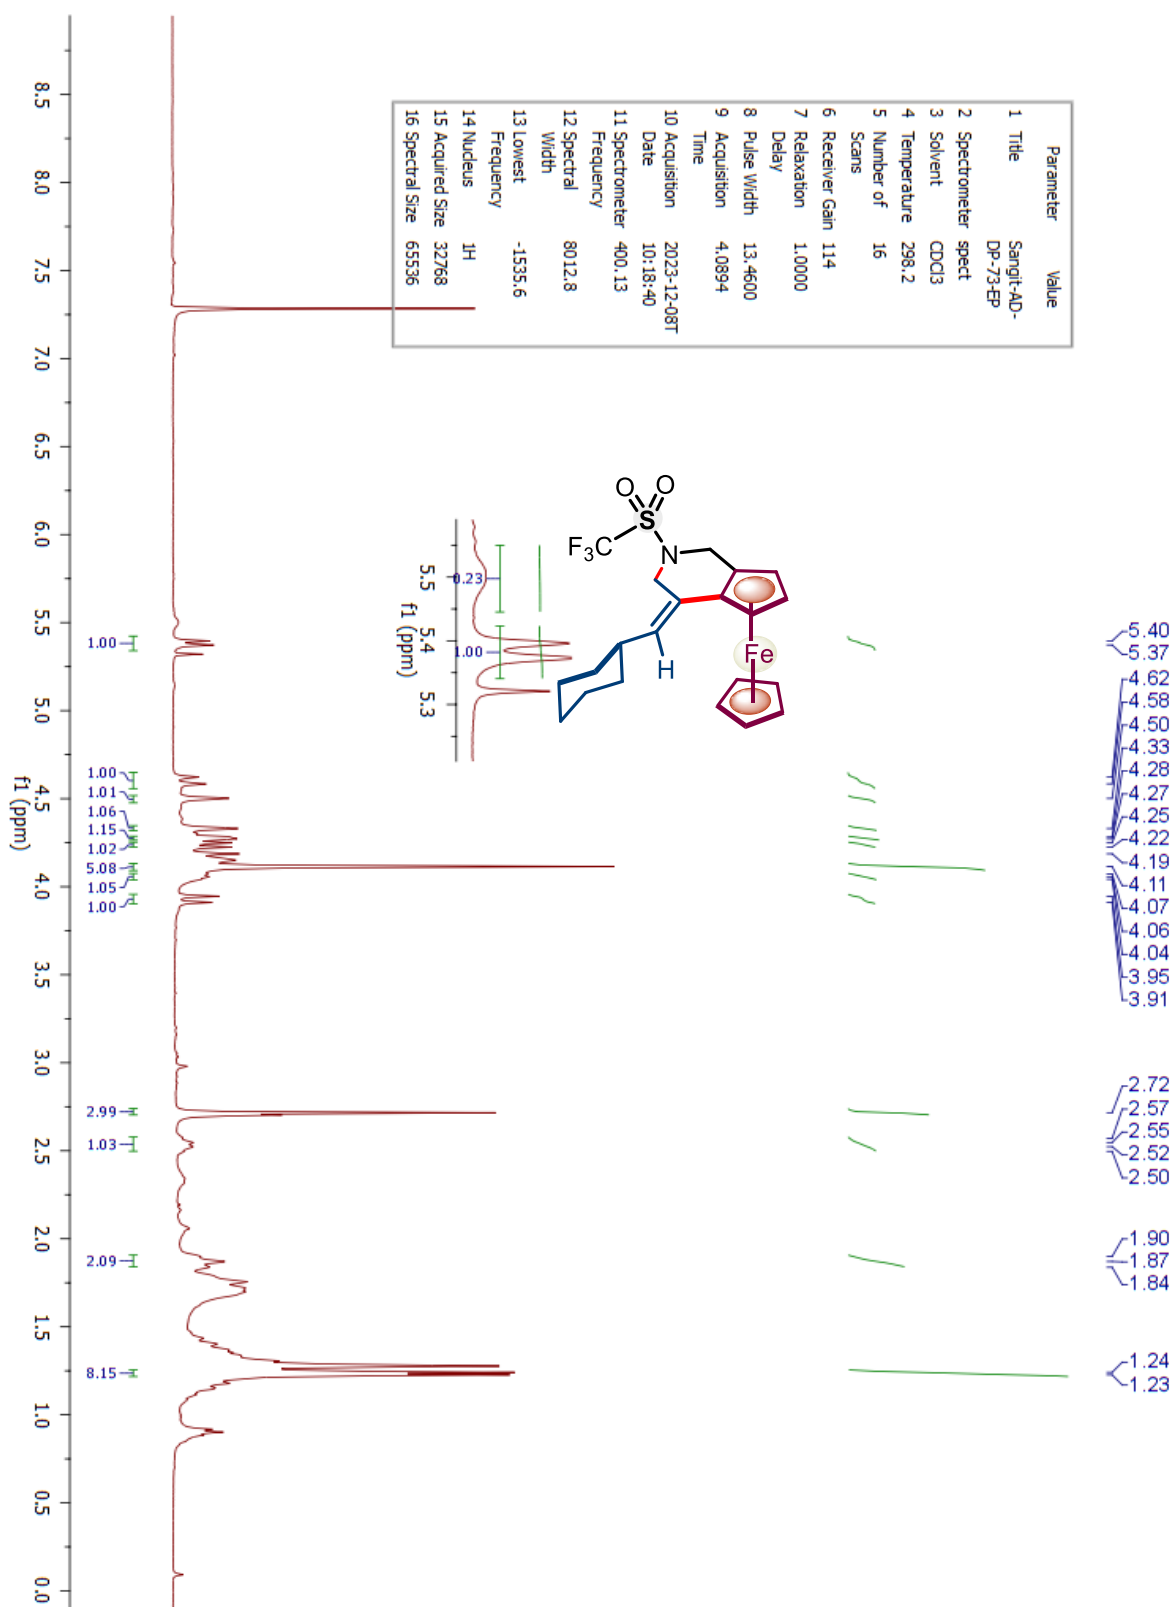

$^{13}\text{C}\{^1\text{H}\}$  NMR Spectrum of **3u**

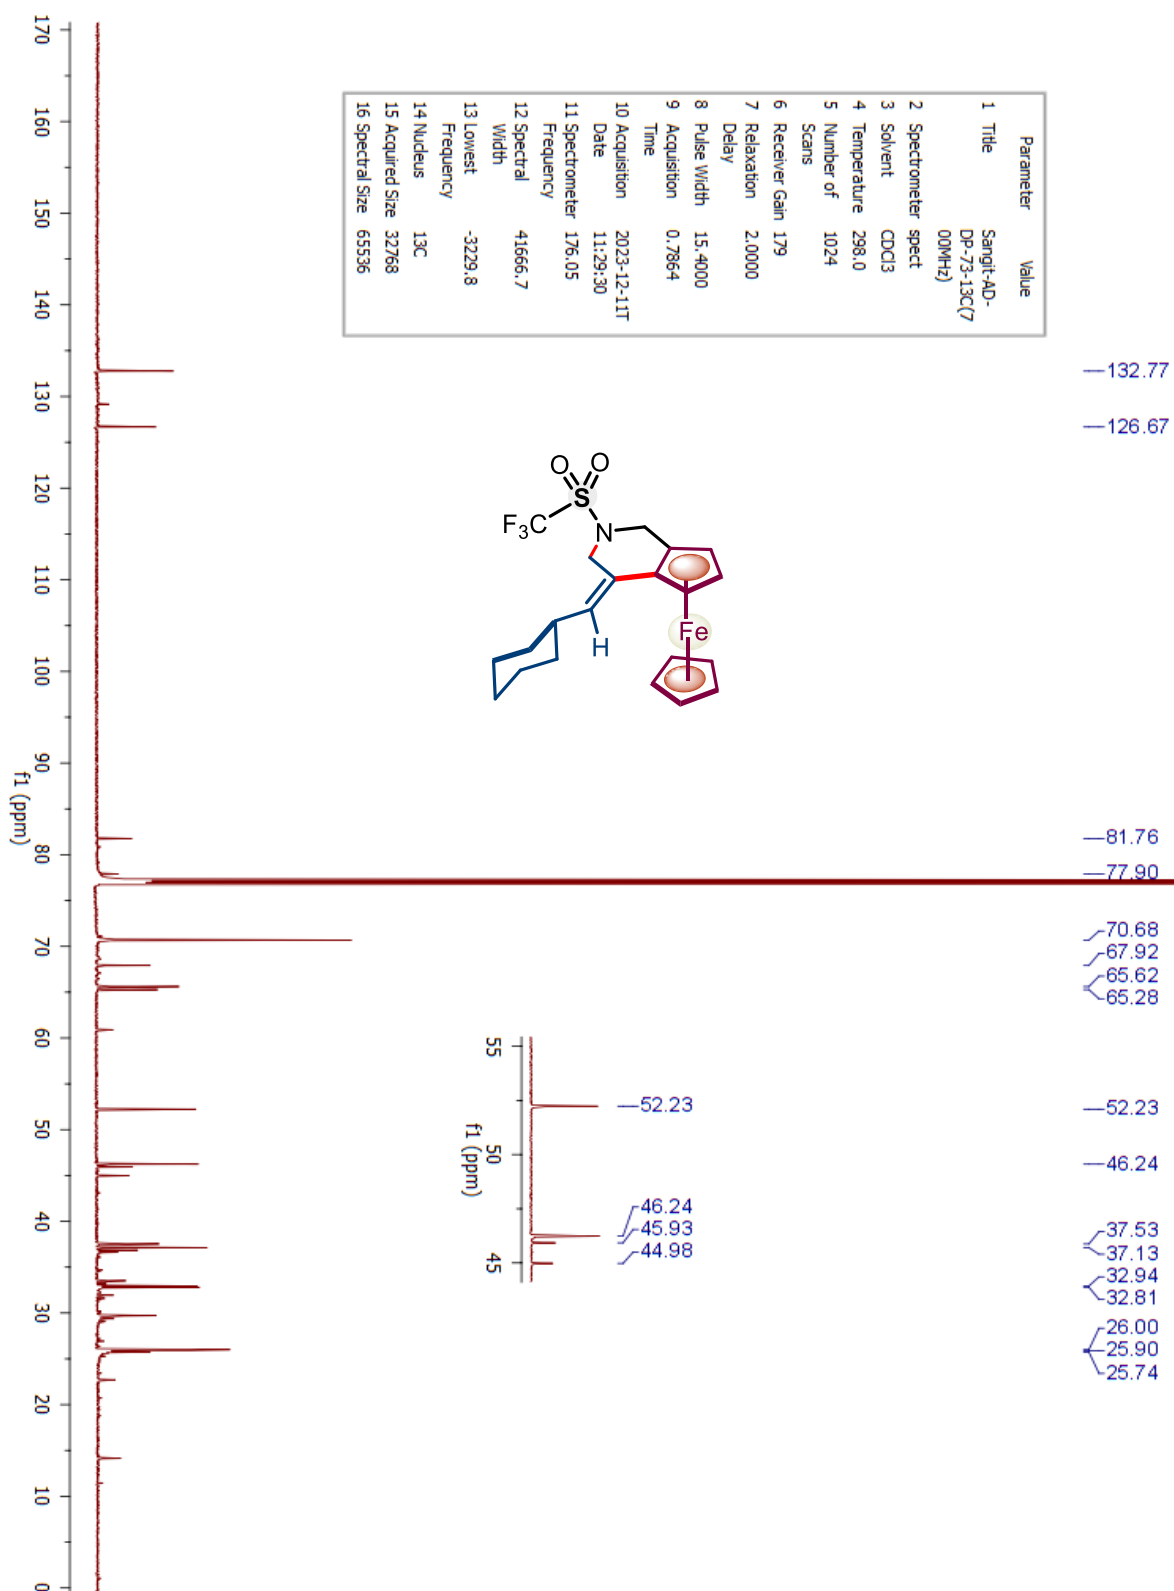

<sup>1</sup>H NMR Spectrum of **3v**

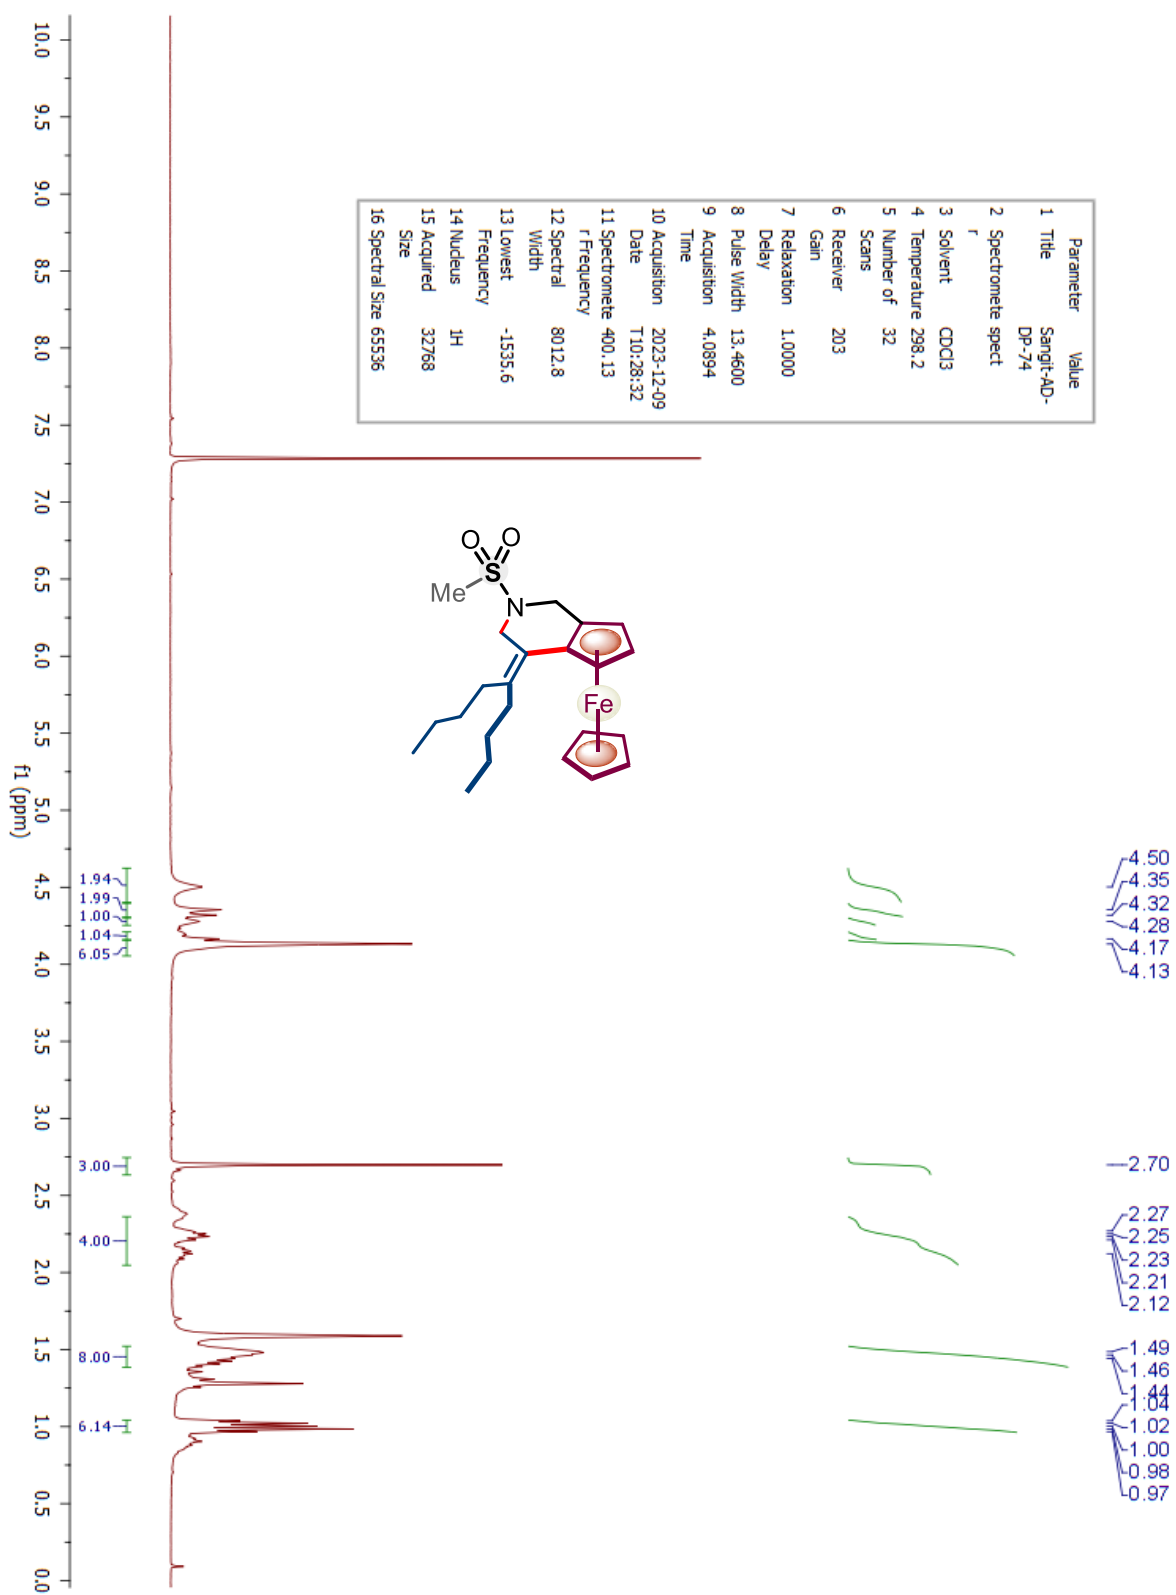

$^{13}\text{C}\{^1\text{H}\}$  NMR Spectrum of **3v**

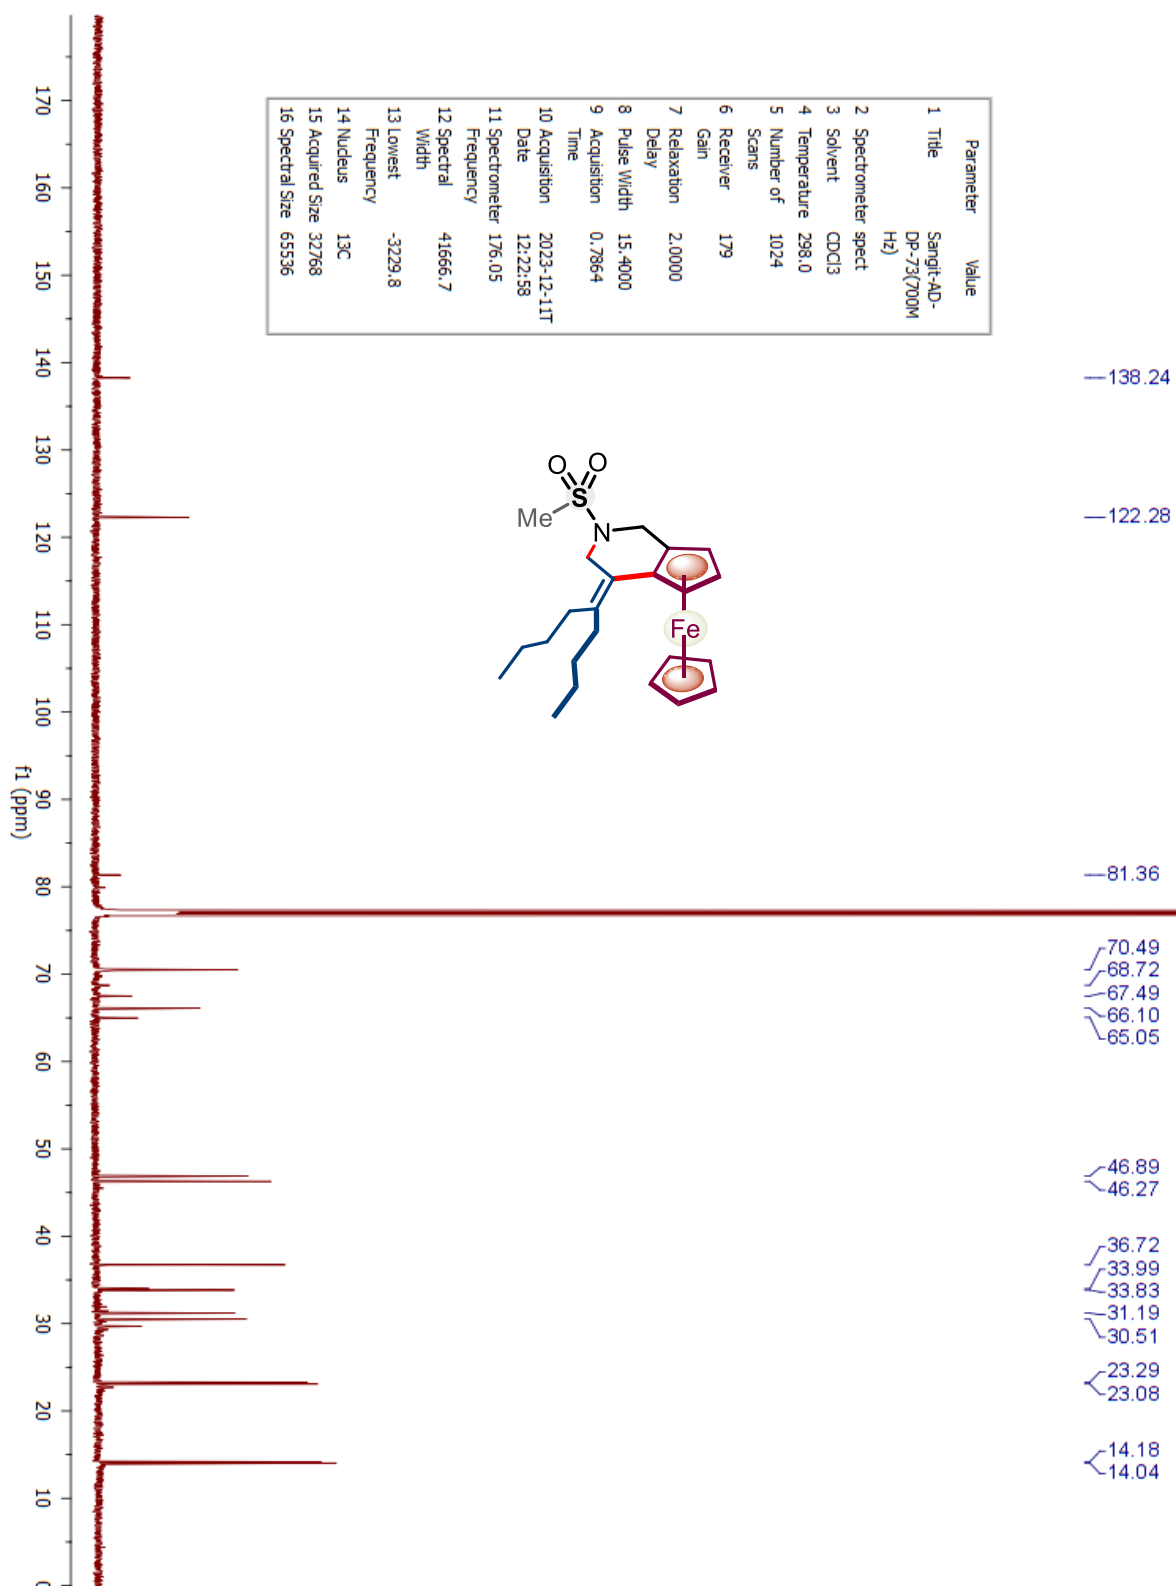



<sup>1</sup>H NMR Spectrum of **3w**

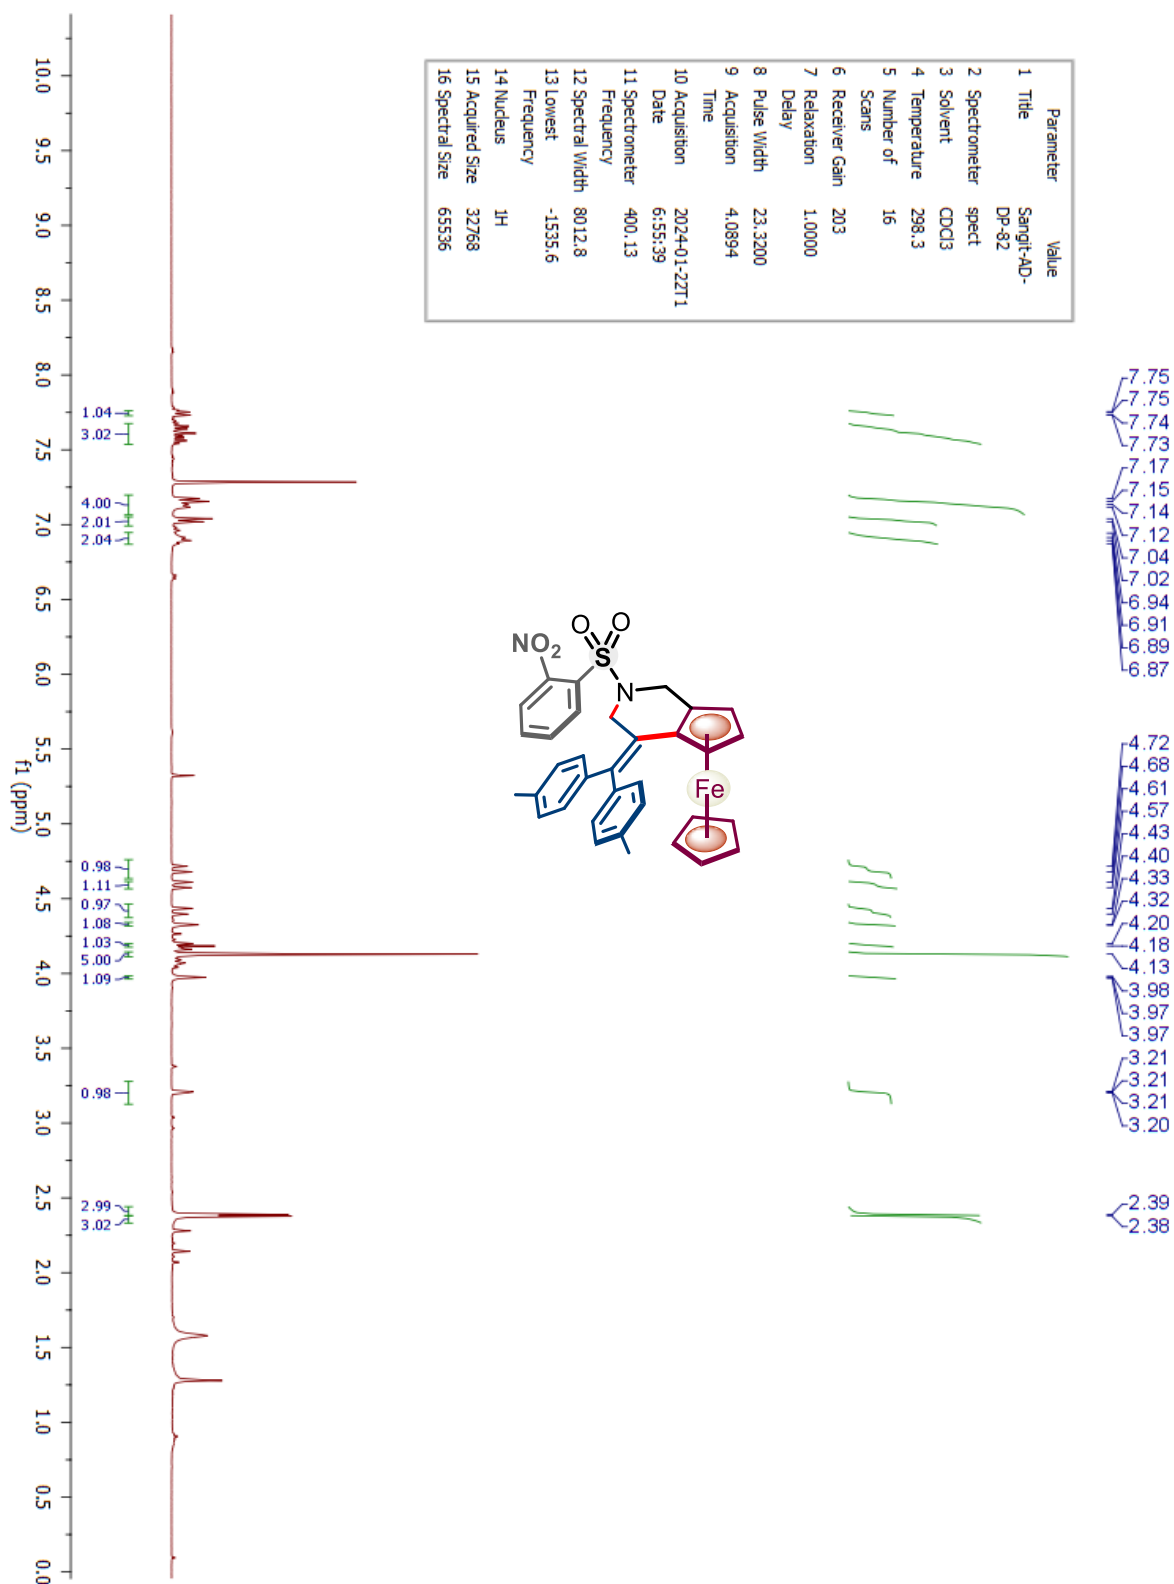

$^{13}\text{C}\{^1\text{H}\}$  NMR Spectrum of **3w**

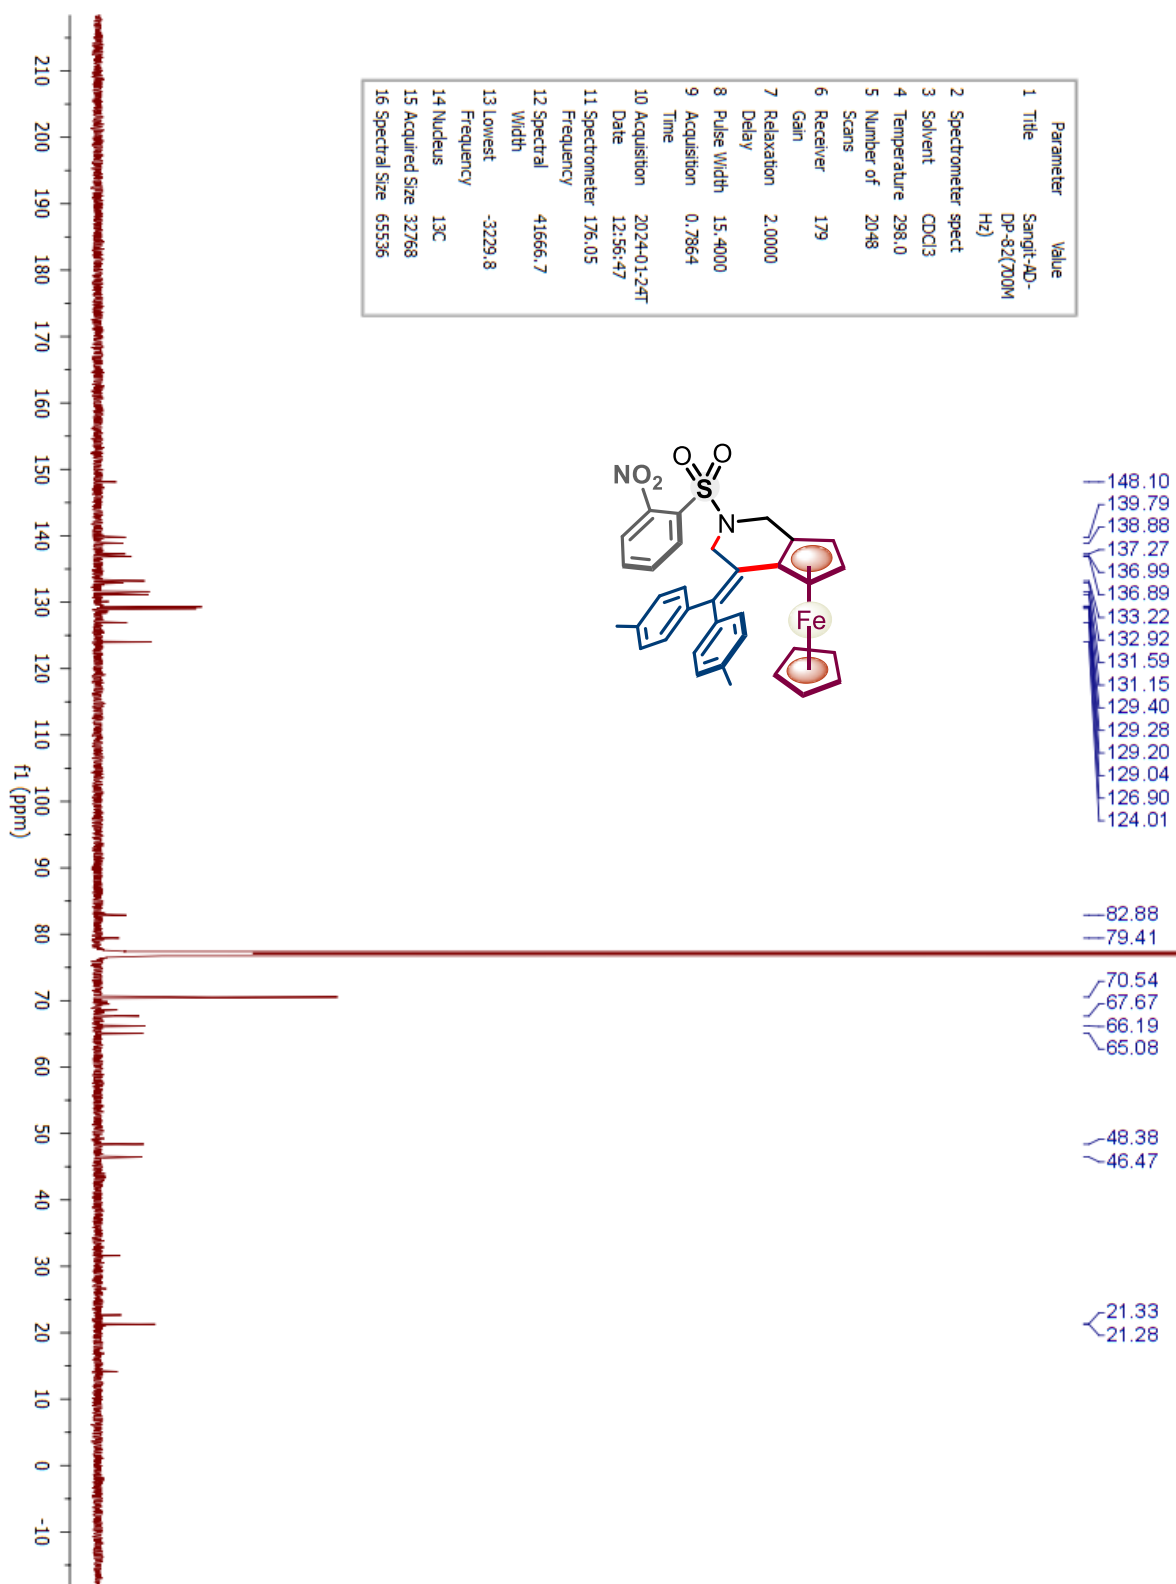

| Parameter                 | Value                    |
|---------------------------|--------------------------|
| 1 Title                   | Sanofi-40-DP-82(700M Hz) |
| 2 Spectrometer spect      |                          |
| 3 Solvent                 | CDCl3                    |
| 4 Temperature             | 298.0                    |
| 5 Number of Scans         | 2048                     |
| 6 Receiver Gain           | 179                      |
| 7 Relaxation Delay        | 2.0000                   |
| 8 Pulse Width             | 15.4000                  |
| 9 Acquisition Time        | 0.7864                   |
| 10 Acquisition Date       | 2024-01-24T12:56:47      |
| 11 Spectrometer Frequency | 176.05                   |
| 12 Spectral Width         | 41666.7                  |
| 13 Lowest Frequency       | -3229.8                  |
| 14 Nucleus                | $^{13}\text{C}$          |
| 15 Acquired Size          | 32768                    |
| 16 Spectral Size          | 65536                    |

<sup>1</sup>H NMR Spectrum of **3x**

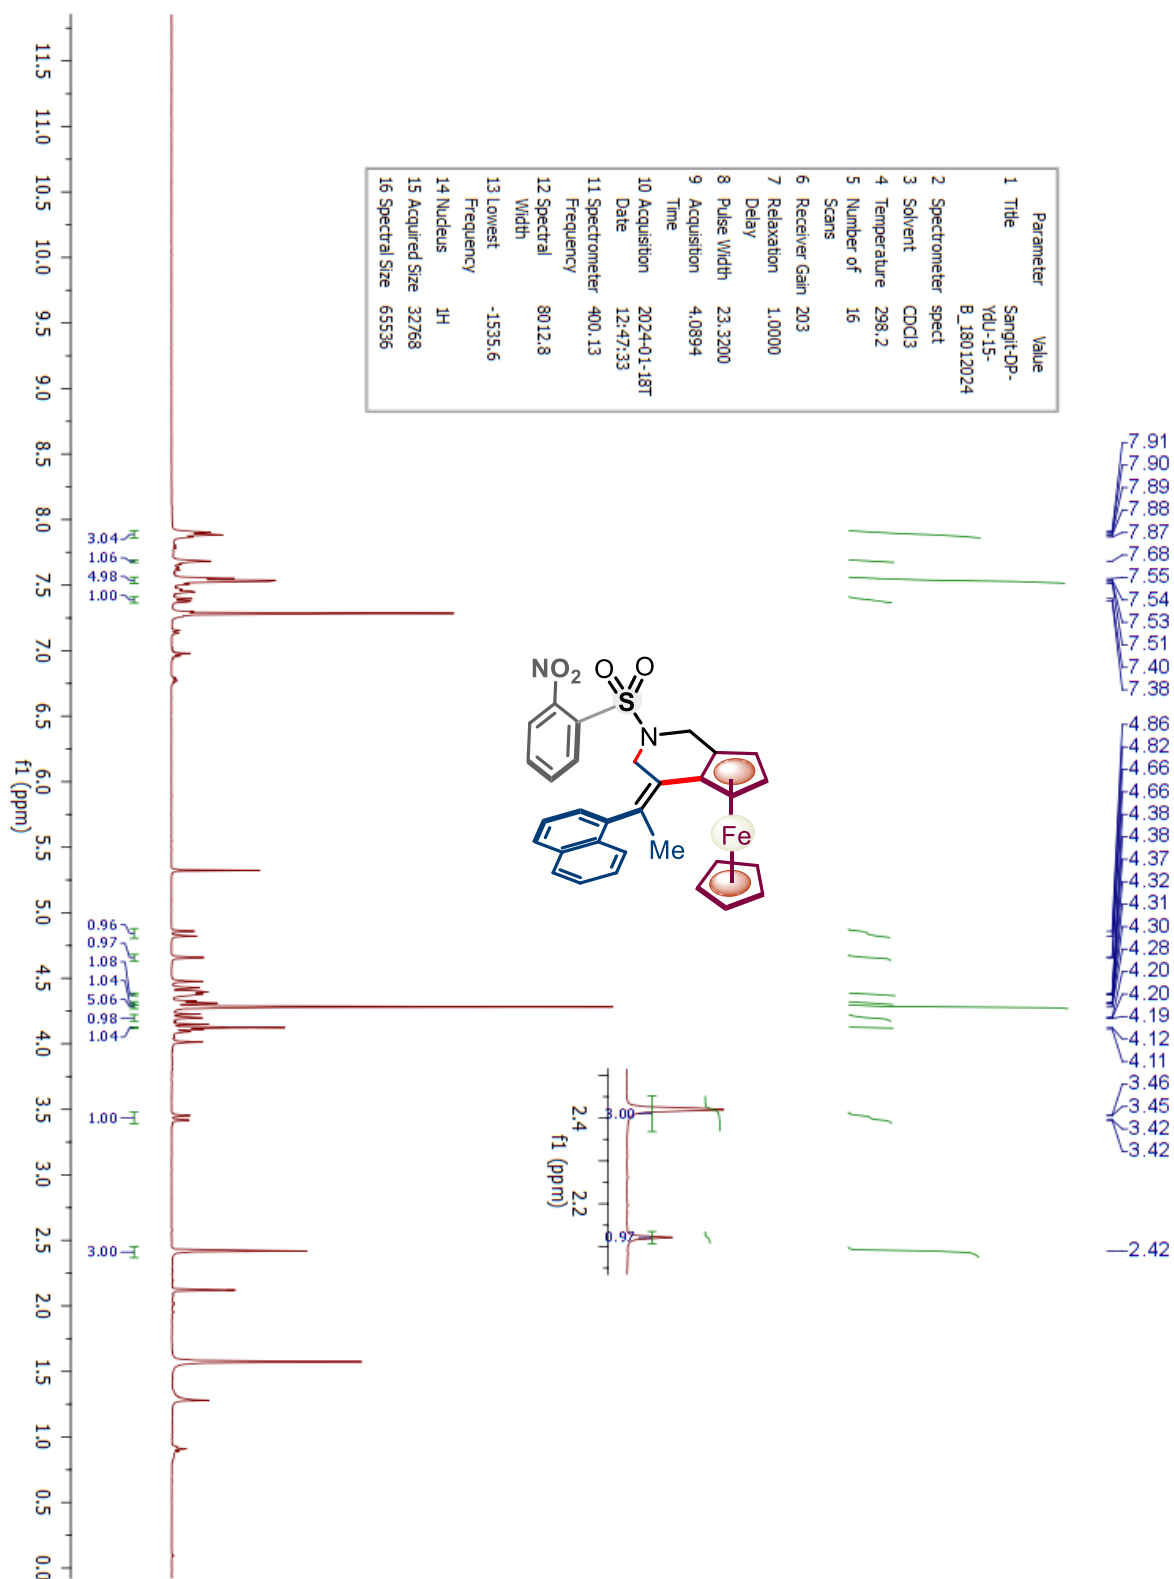

$^{13}\text{C}\{^1\text{H}\}$  NMR Spectrum of **3x**

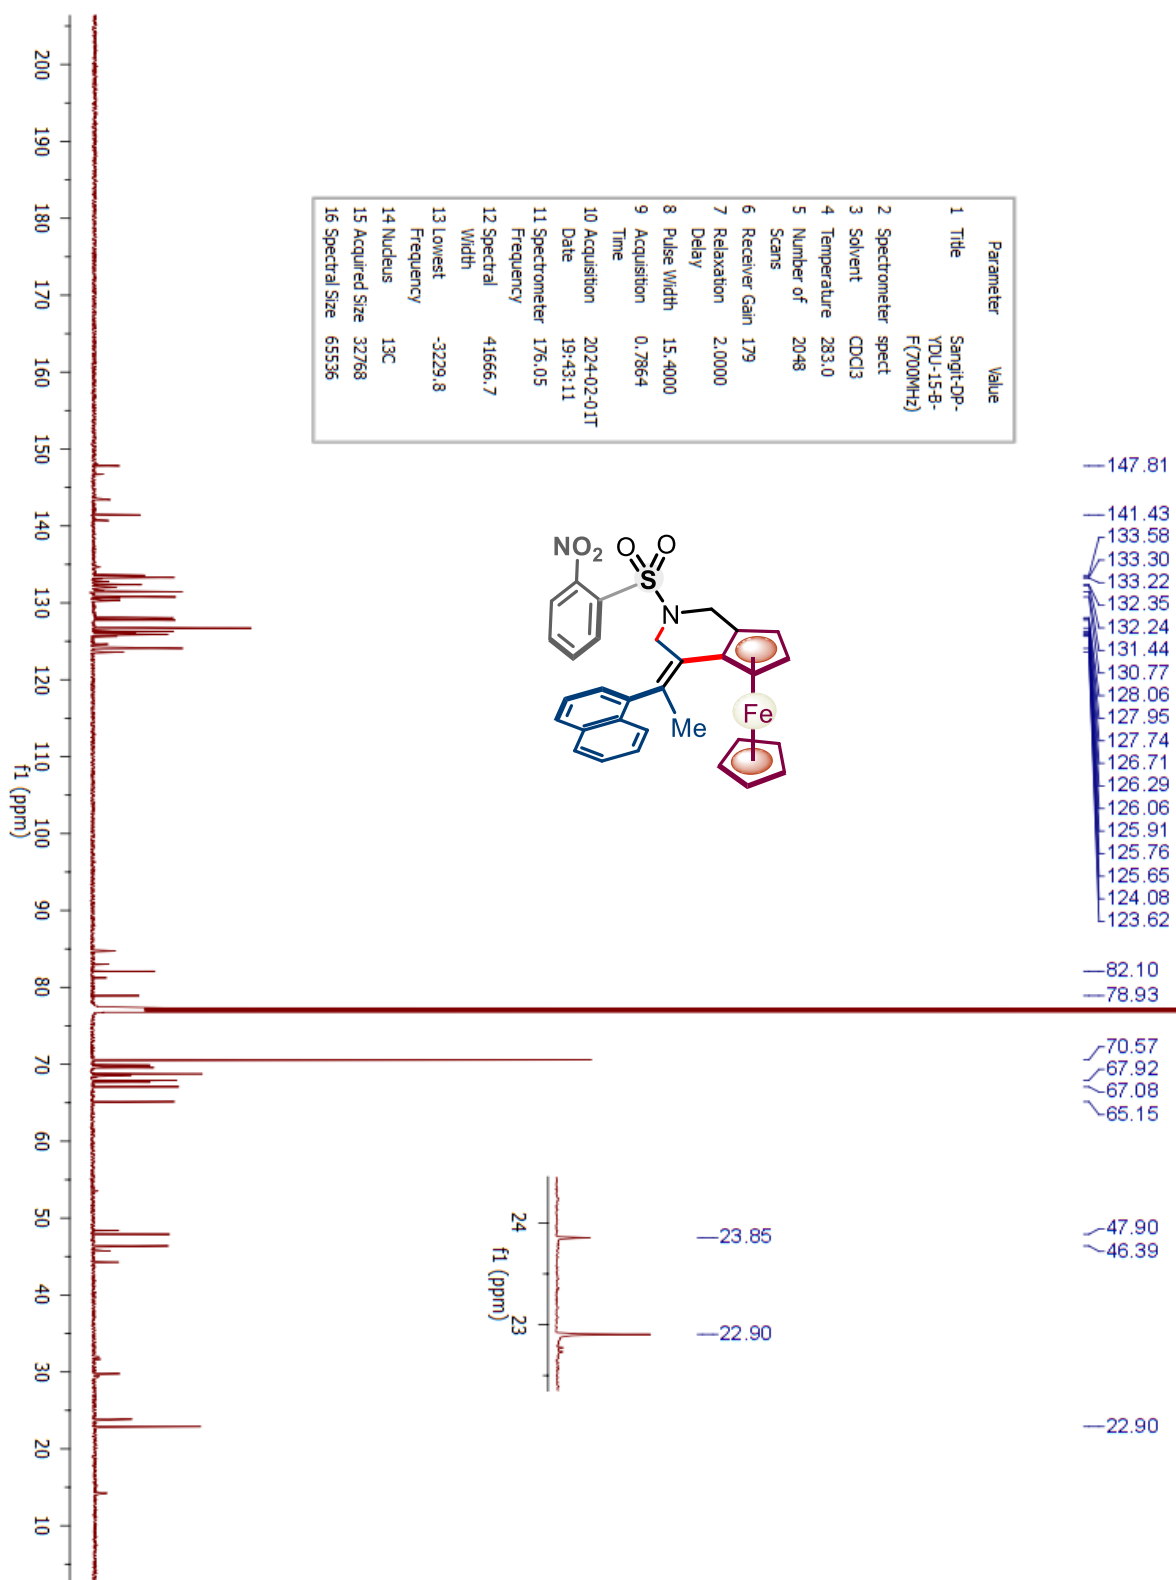

# <sup>1</sup>H NMR Spectrum of 3y

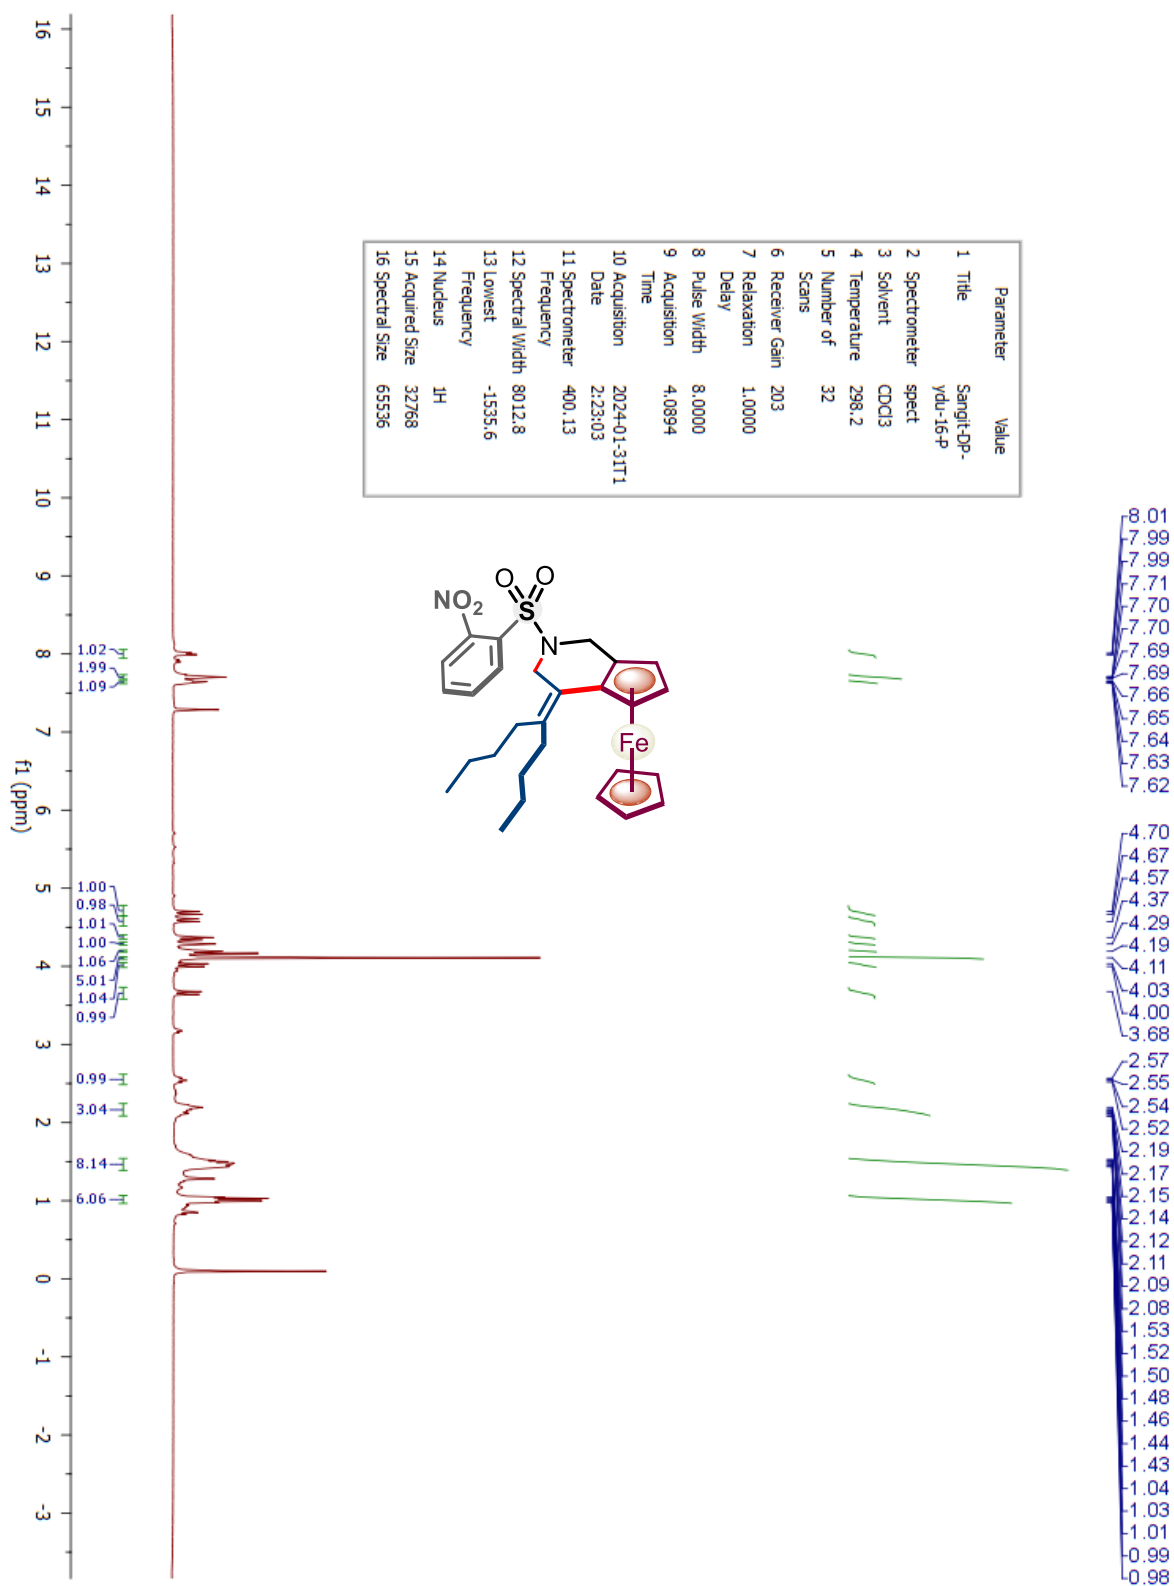

$^{13}\text{C}\{^1\text{H}\}$  NMR Spectrum of **3y**

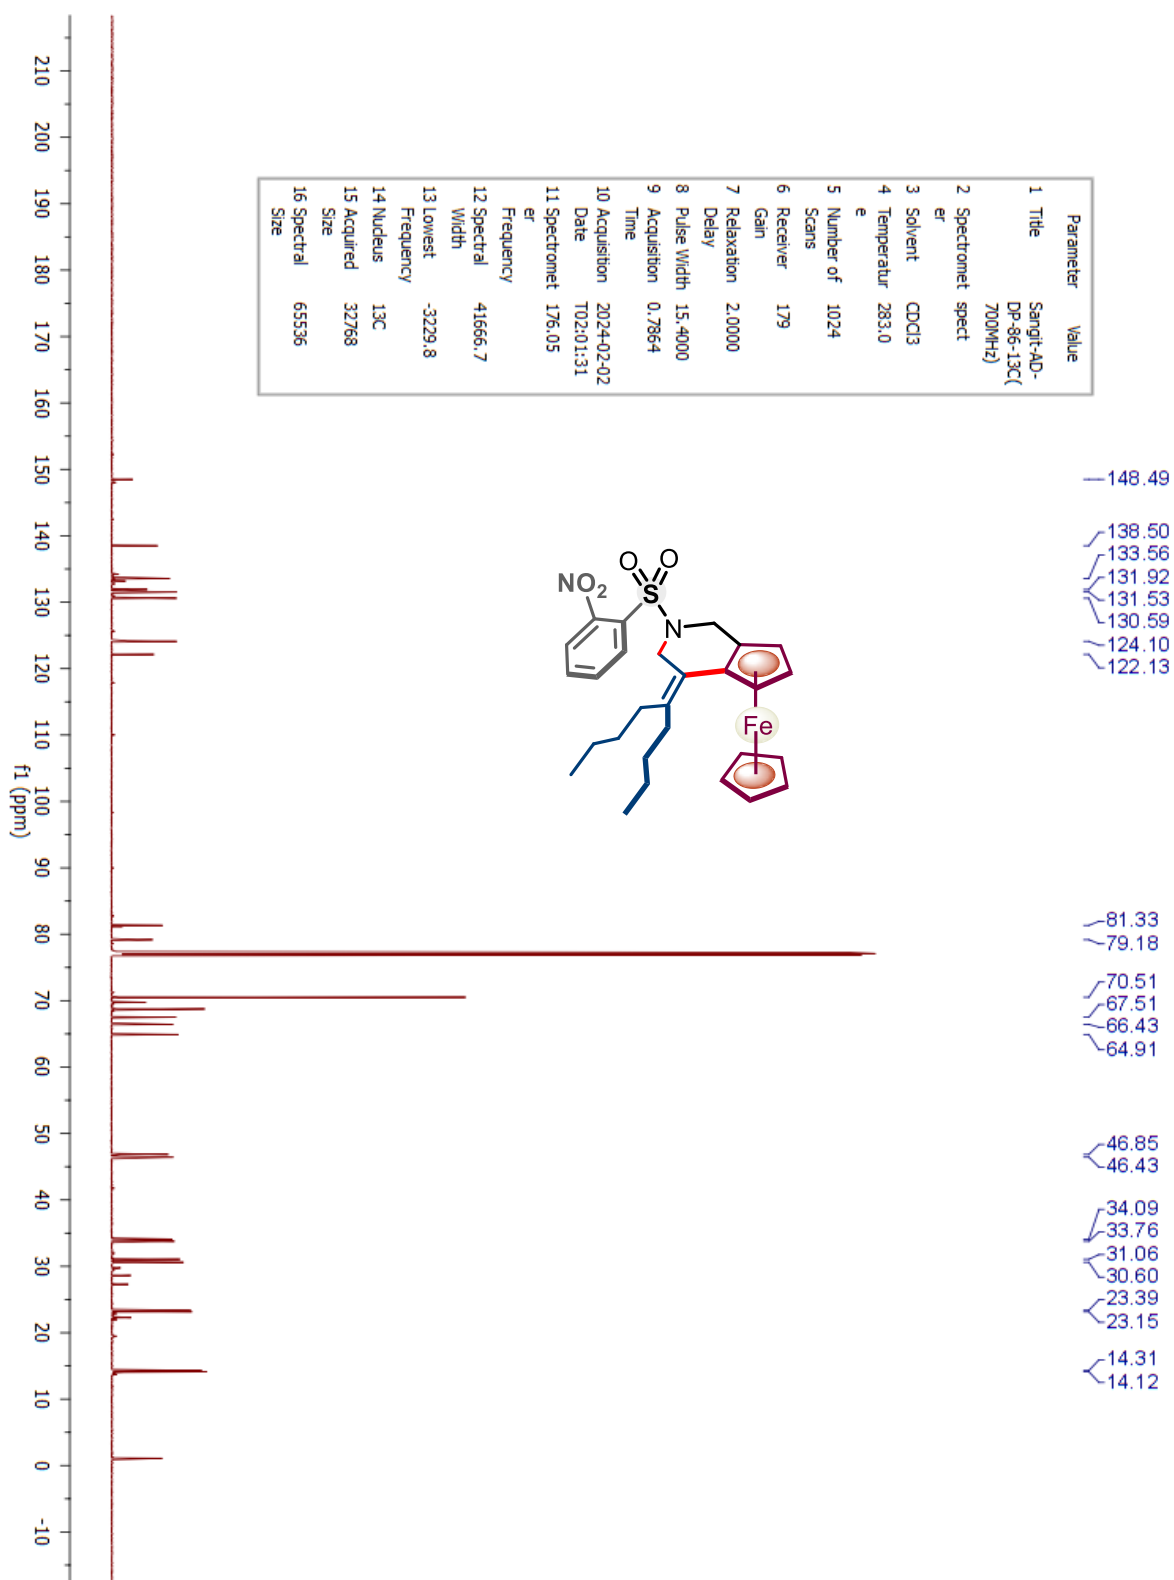

<sup>1</sup>H NMR Spectrum of **3z**

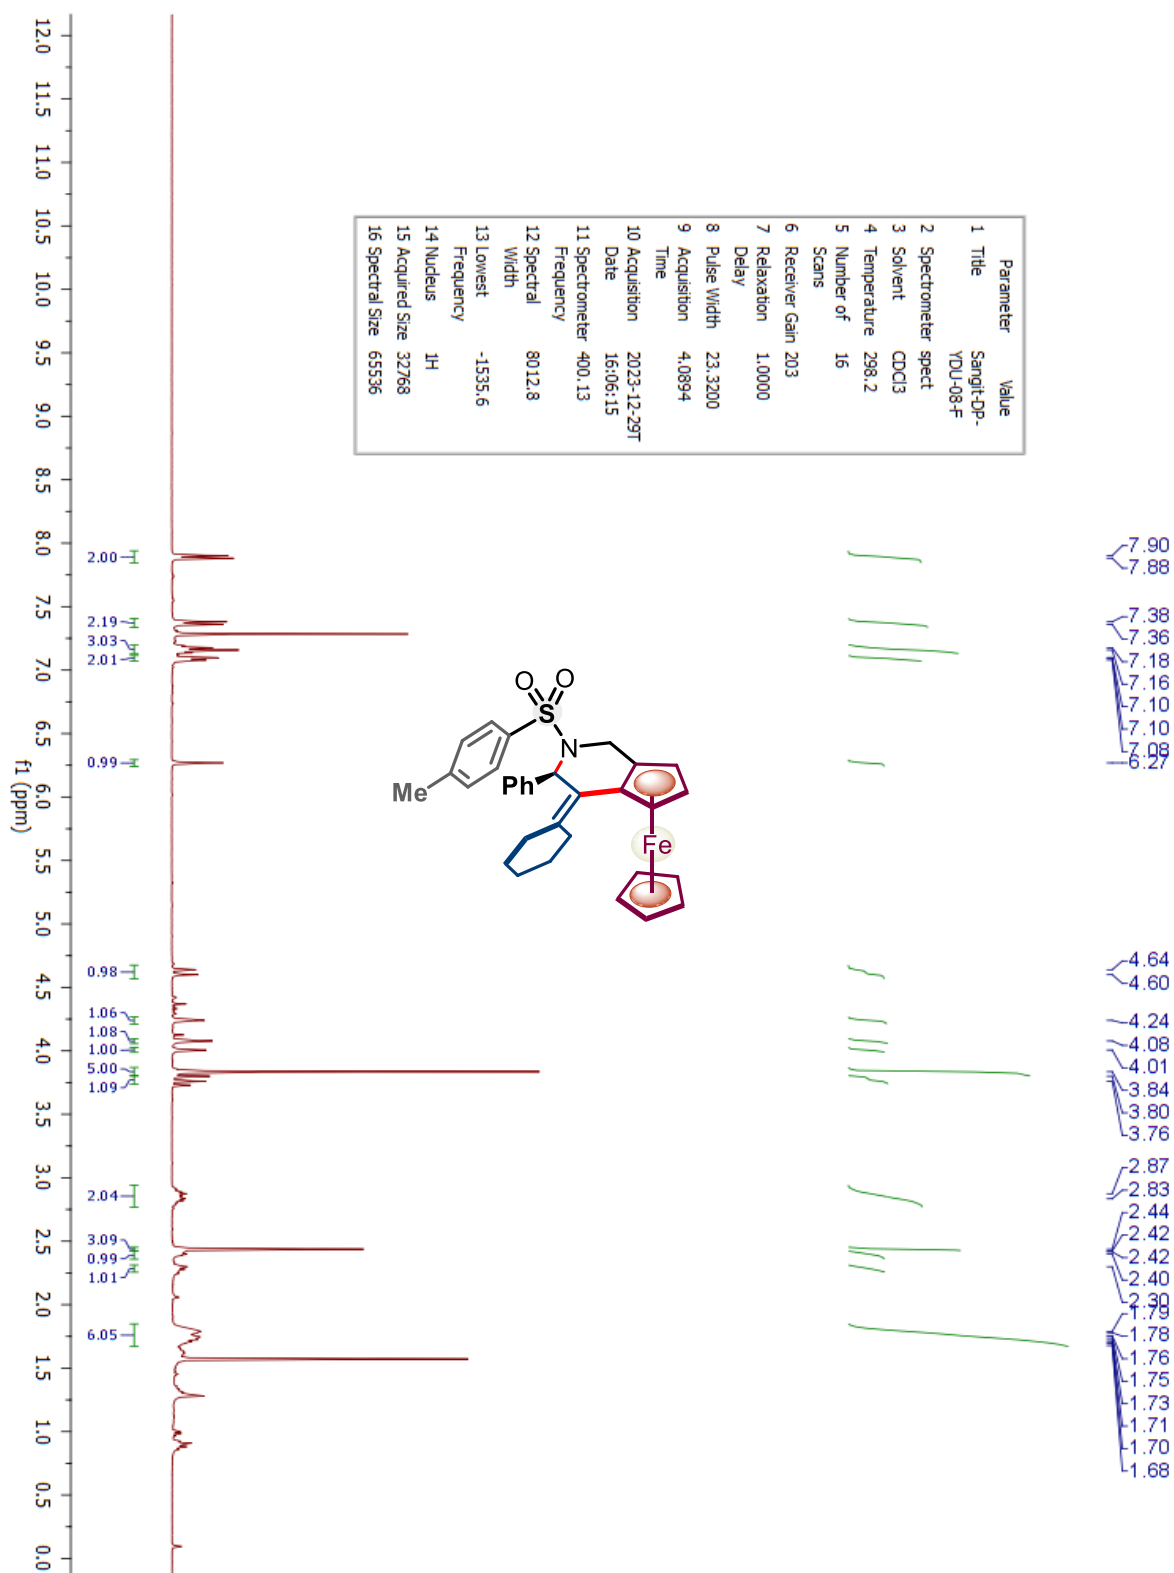

$^{13}\text{C}\{^1\text{H}\}$  NMR Spectrum of **3z**

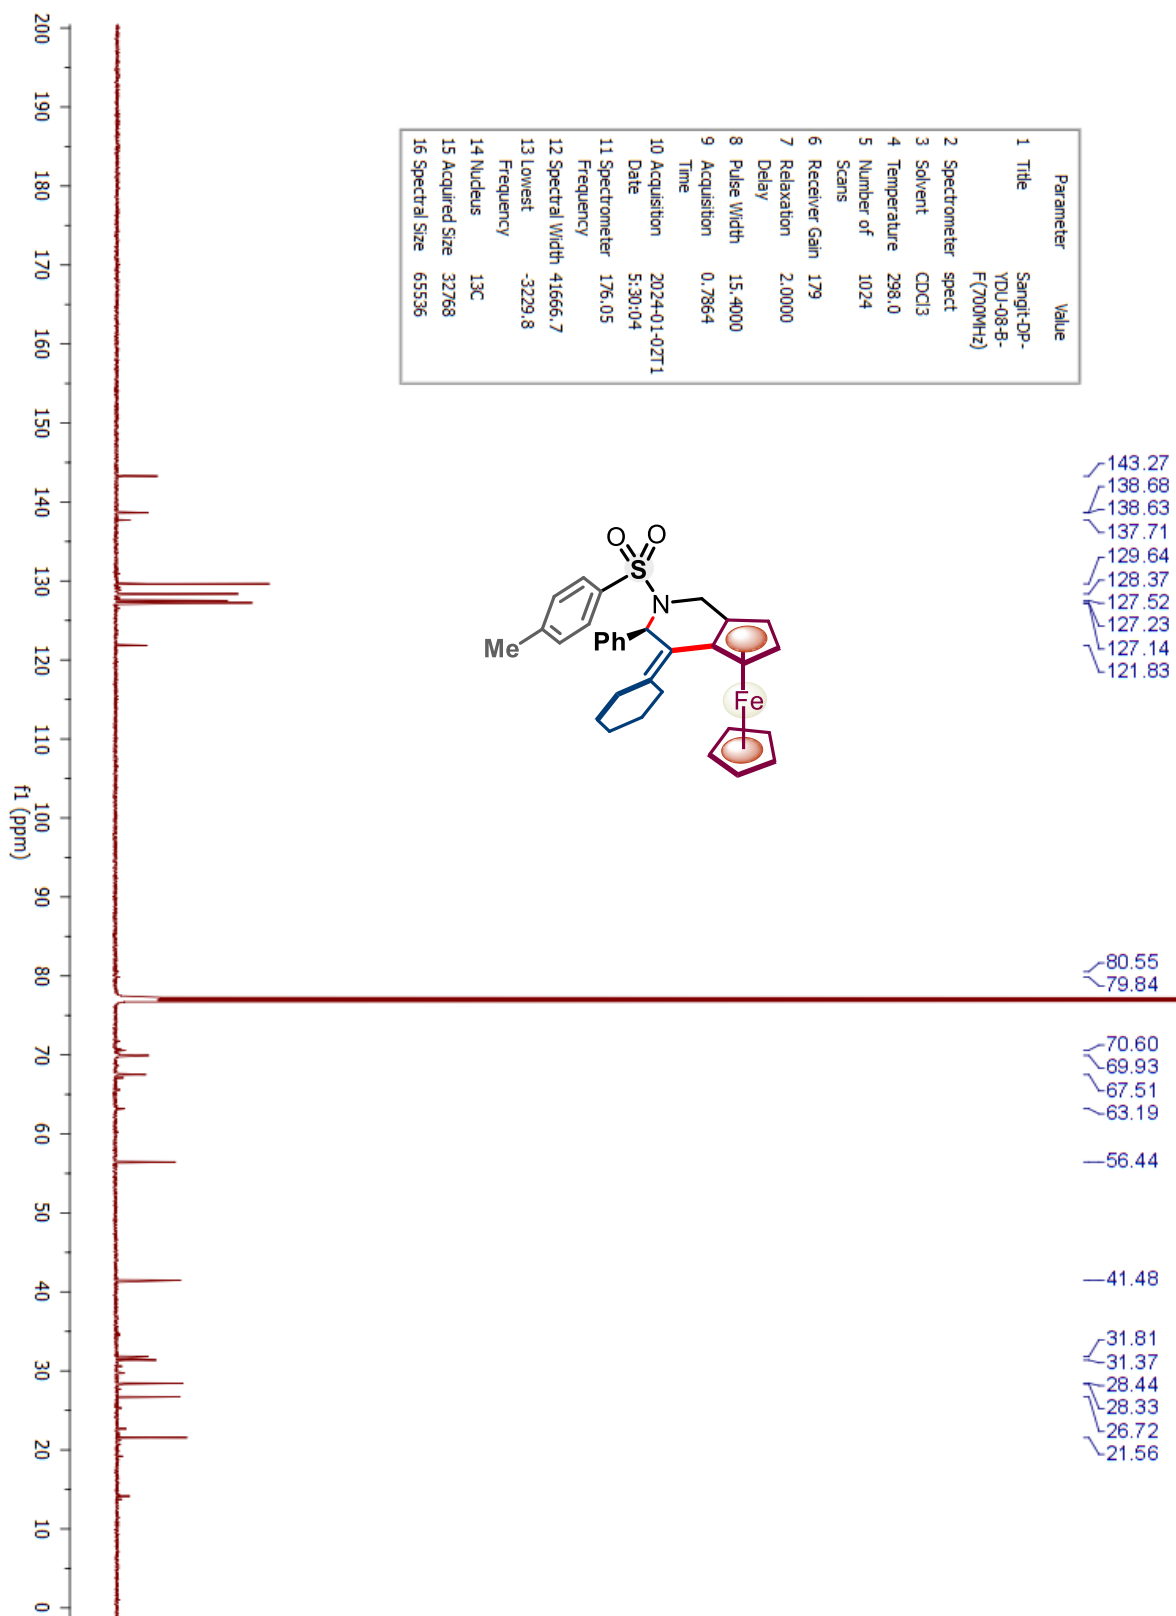



# <sup>1</sup>H NMR Spectrum of 4a

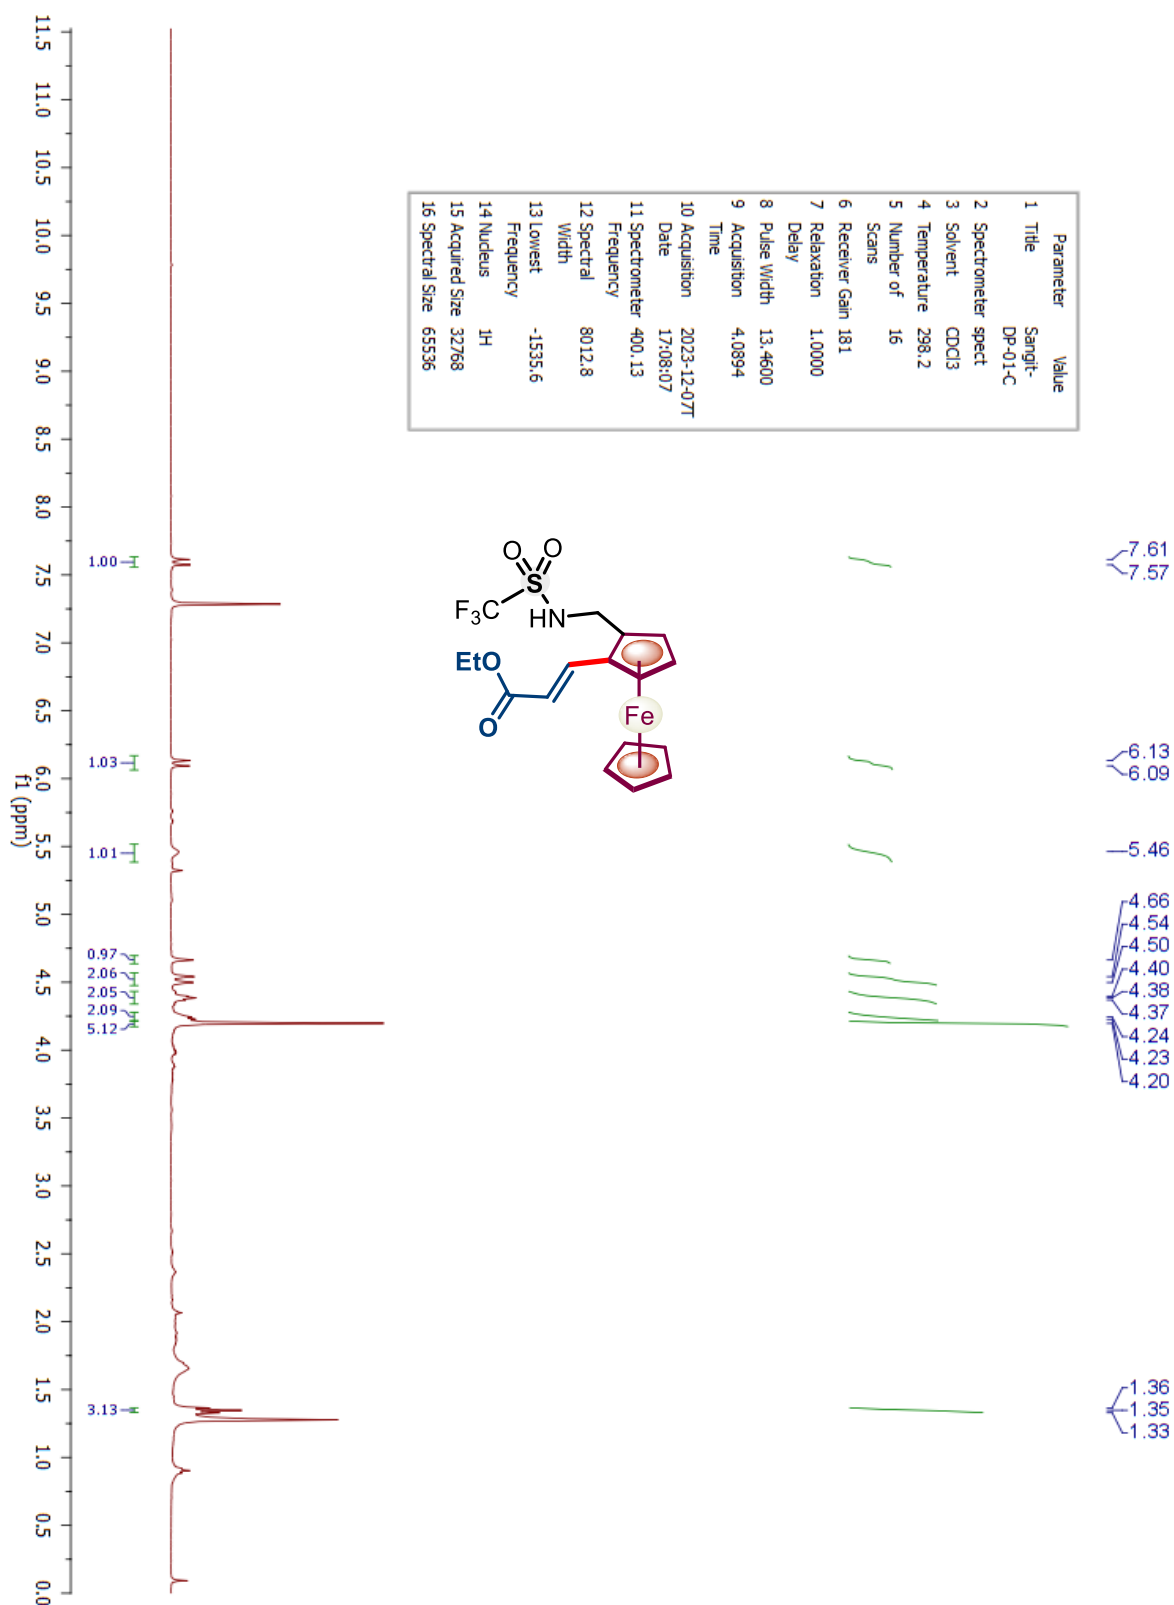

# $^{13}\text{C}\{^1\text{H}\}$ NMR Spectrum of **4a**

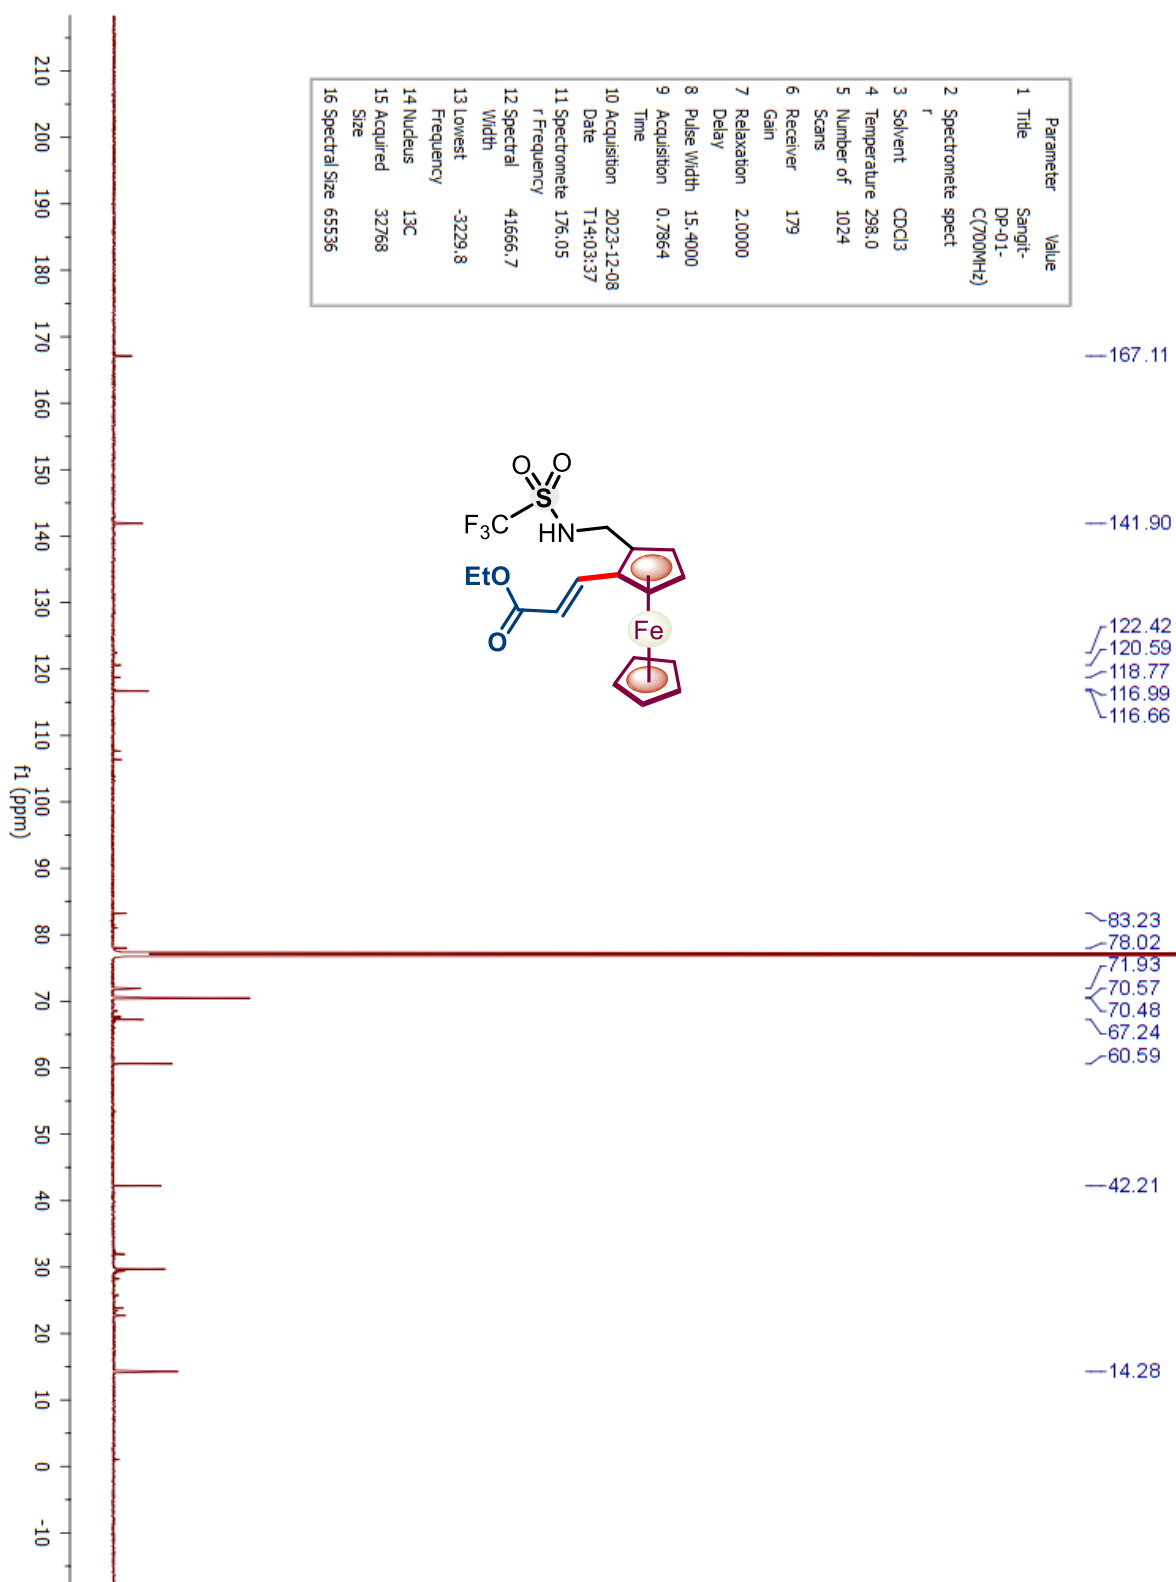

| Parameter                 | Value                          |
|---------------------------|--------------------------------|
| 1 Title                   | Sangit-<br>DP-01-<br>C(700MHz) |
| 2 Spectrometer spect      | r                              |
| 3 Solvent                 | CDCl3                          |
| 4 Temperature             | 298.0                          |
| 5 Number of Scans         | 1024                           |
| 6 Receiver Gain           | 179                            |
| 7 Relaxation Delay        | 2.0000                         |
| 8 Pulse Width             | 15.4000                        |
| 9 Acquisition Time        | 0.7864                         |
| 10 Acquisition Date       | 2023-12-08<br>T14:03:37        |
| 11 Spectrometer Frequency | 176.05                         |
| 12 Spectral Width         | 41666.7                        |
| 13 Lowest Frequency       | -3229.8                        |
| 14 Nucleus                | $^{13}\text{C}$                |
| 15 Acquired Size          | 32768                          |
| 16 Spectral Size          | 65536                          |

# <sup>19</sup>F NMR Spectrum of 4a

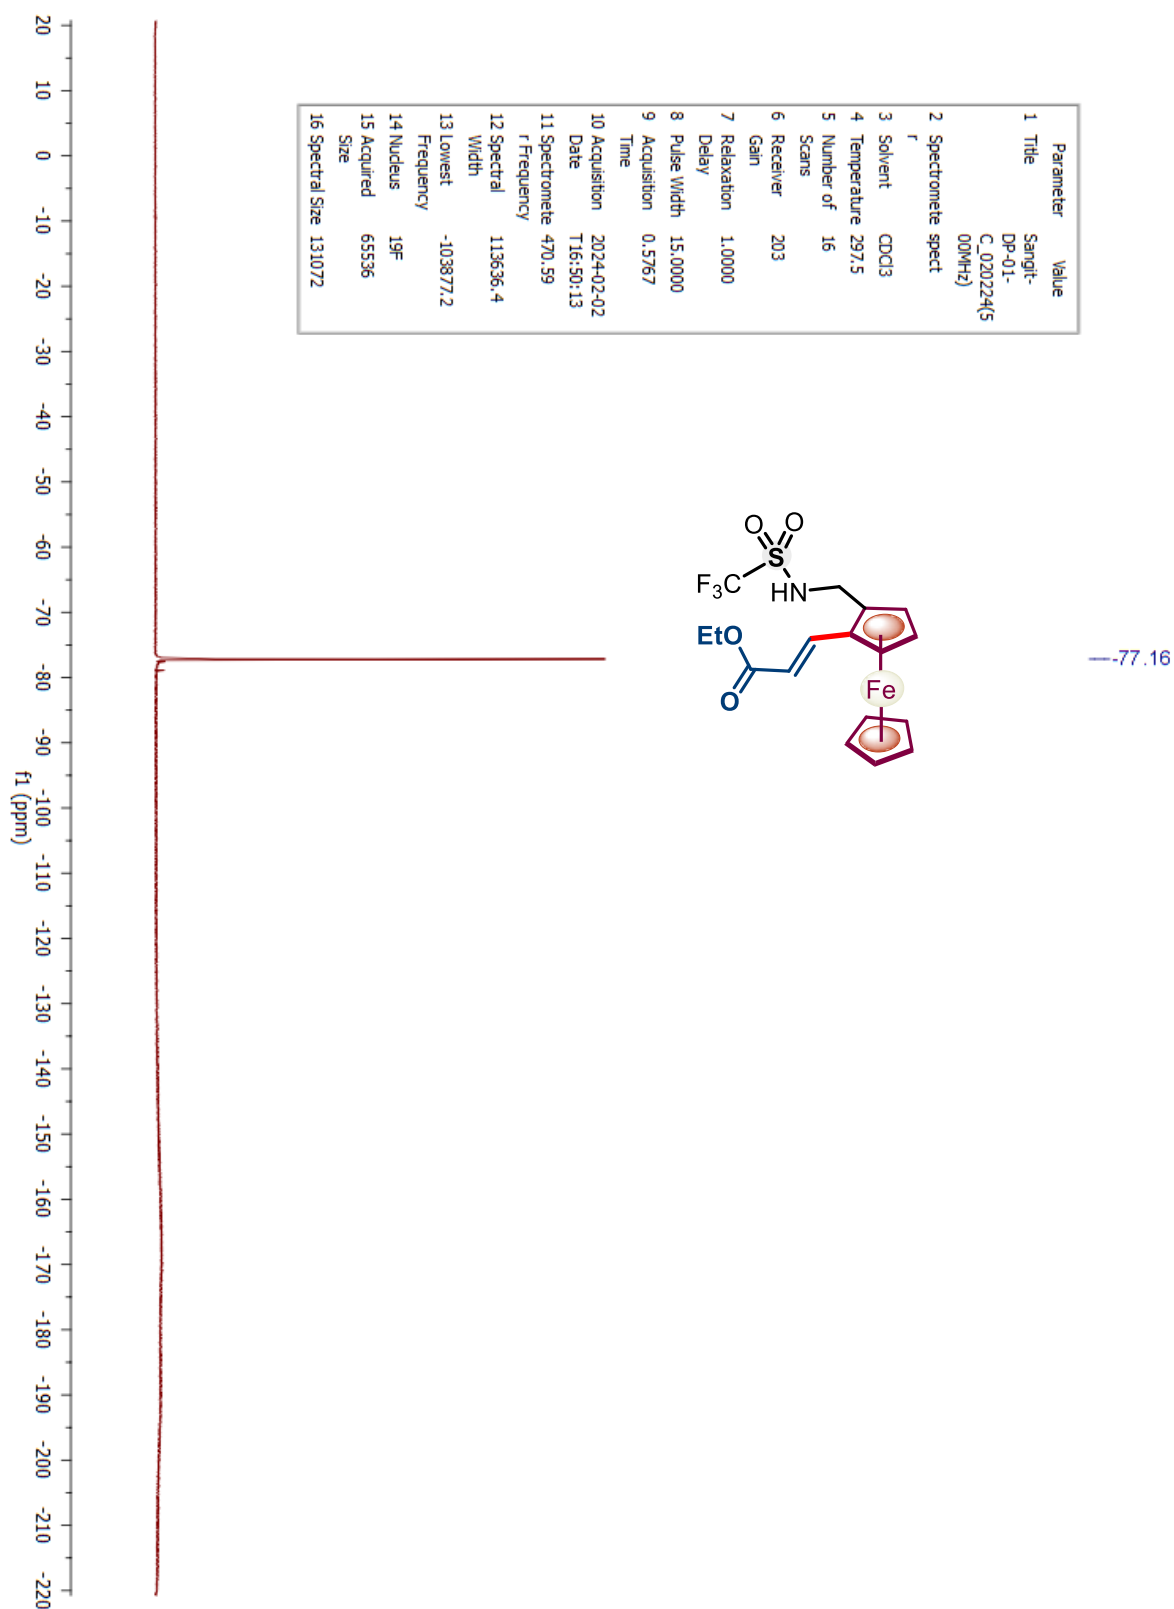

<sup>1</sup>H NMR Spectrum of **4b**

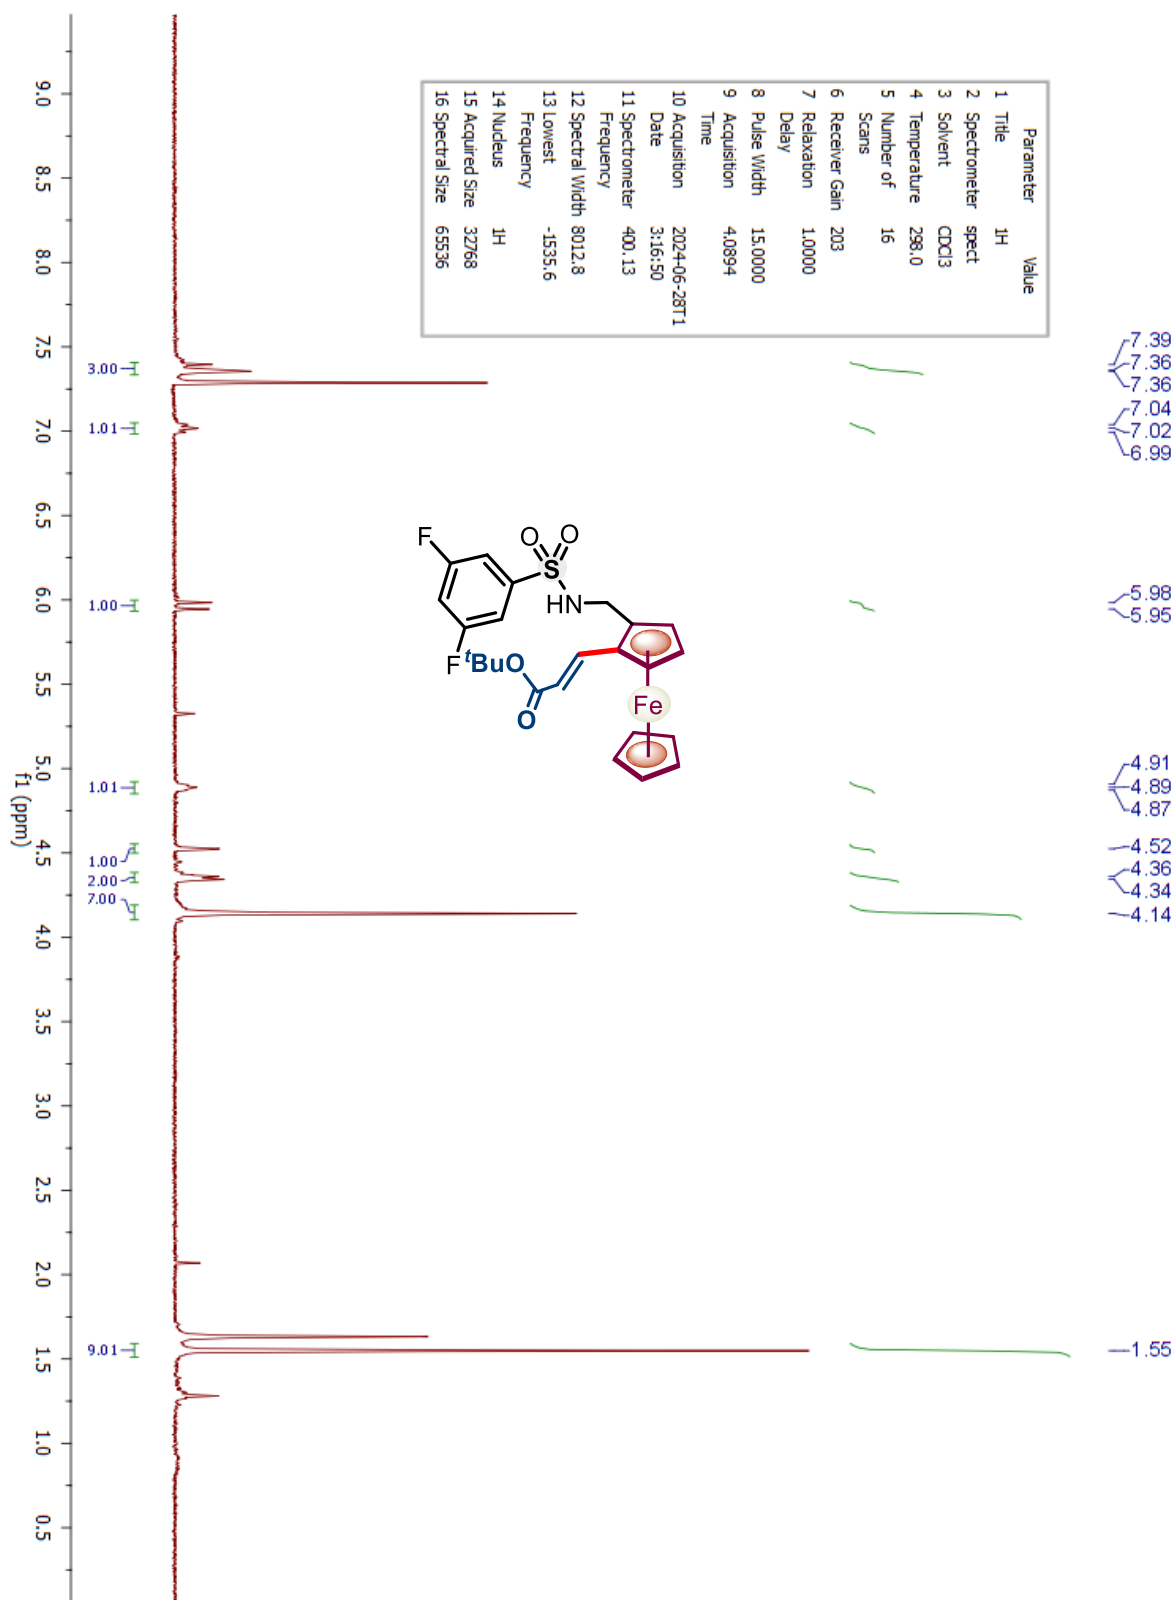

| Parameter                 | Value               |
|---------------------------|---------------------|
| 1 Title                   | 1H                  |
| 2 Spectrometer            | spect               |
| 3 Solvent                 | CDCl3               |
| 4 Temperature             | 298.0               |
| 5 Number of Scans         | 16                  |
| 6 Receiver Gain           | 203                 |
| 7 Relaxation Delay        | 1.0000              |
| 8 Pulse Width             | 15.0000             |
| 9 Acquisition Time        | 4.0894              |
| 10 Acquisition Date       | 2024-06-28T13:16:50 |
| 11 Spectrometer Frequency | 400.13              |
| 12 Spectral Width         | 8012.8              |
| 13 Lowest Frequency       | -1535.6             |
| 14 Nucleus                | <sup>1</sup> H      |
| 15 Acquired Size          | 32768               |
| 16 Spectral Size          | 65536               |

$^{13}\text{C}\{^1\text{H}\}$  NMR Spectrum of **4b**

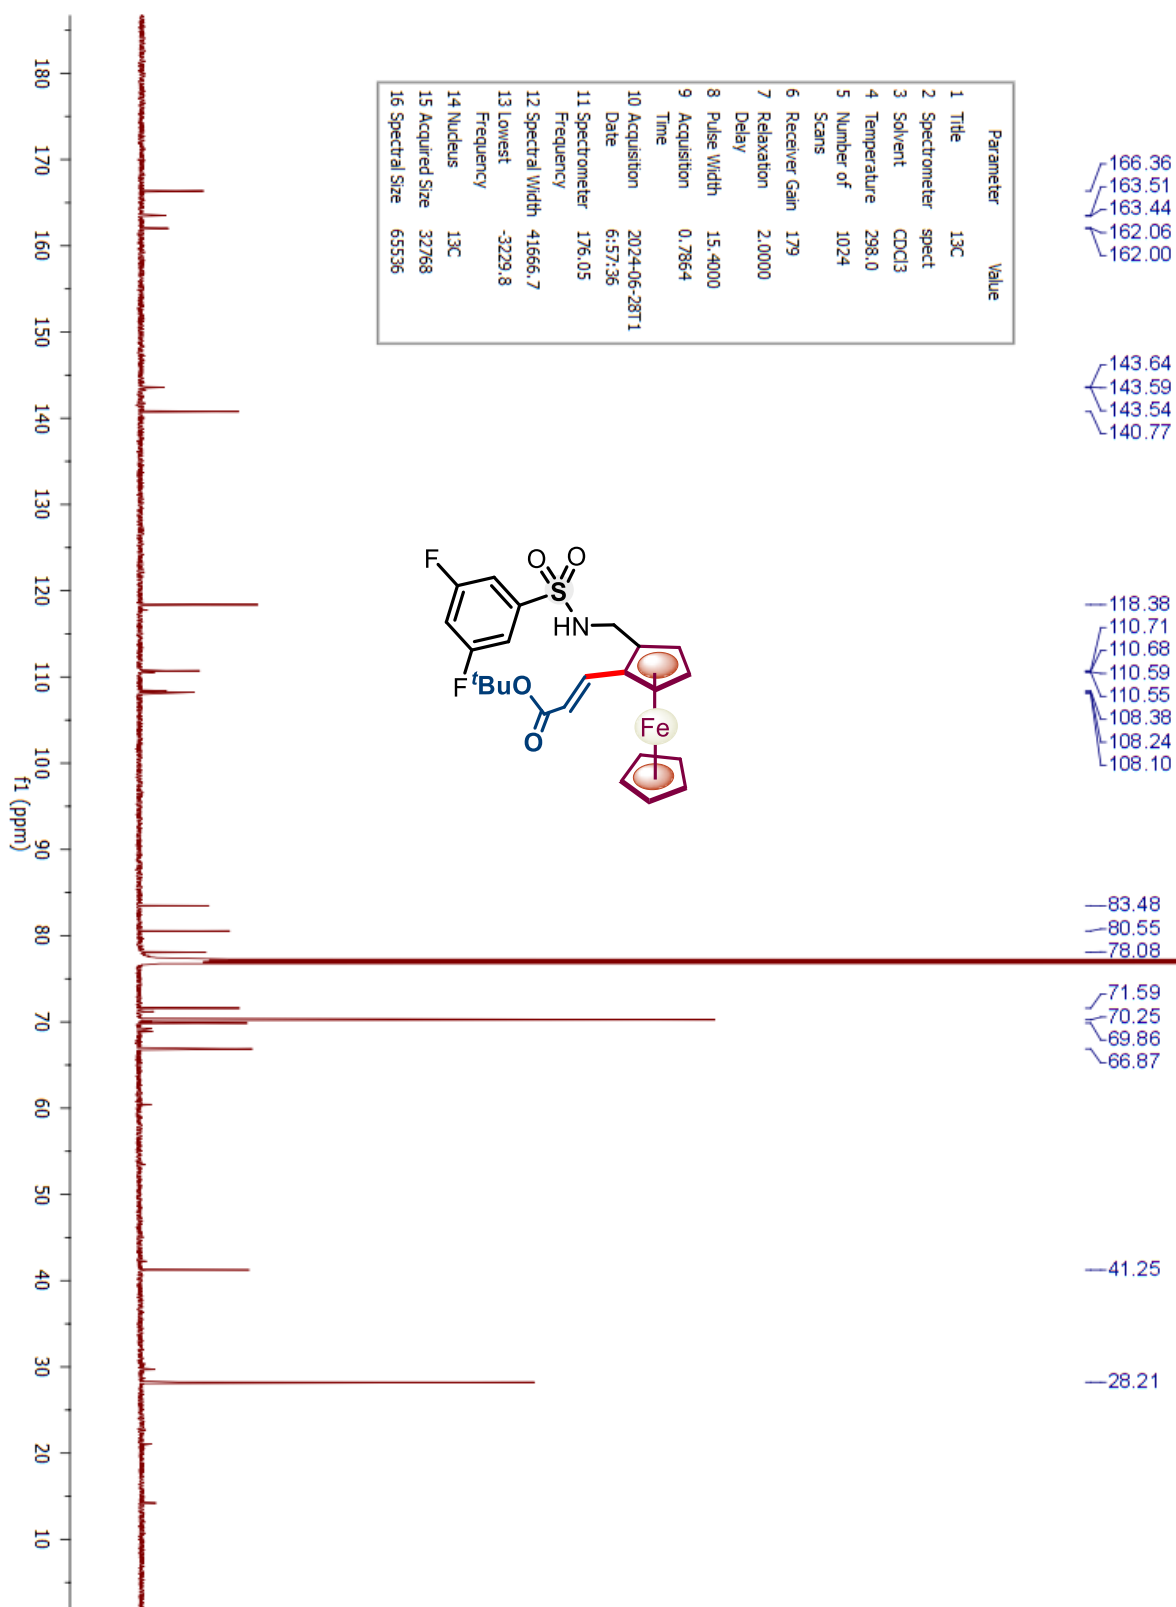

# <sup>1</sup>H NMR Spectrum of 4c

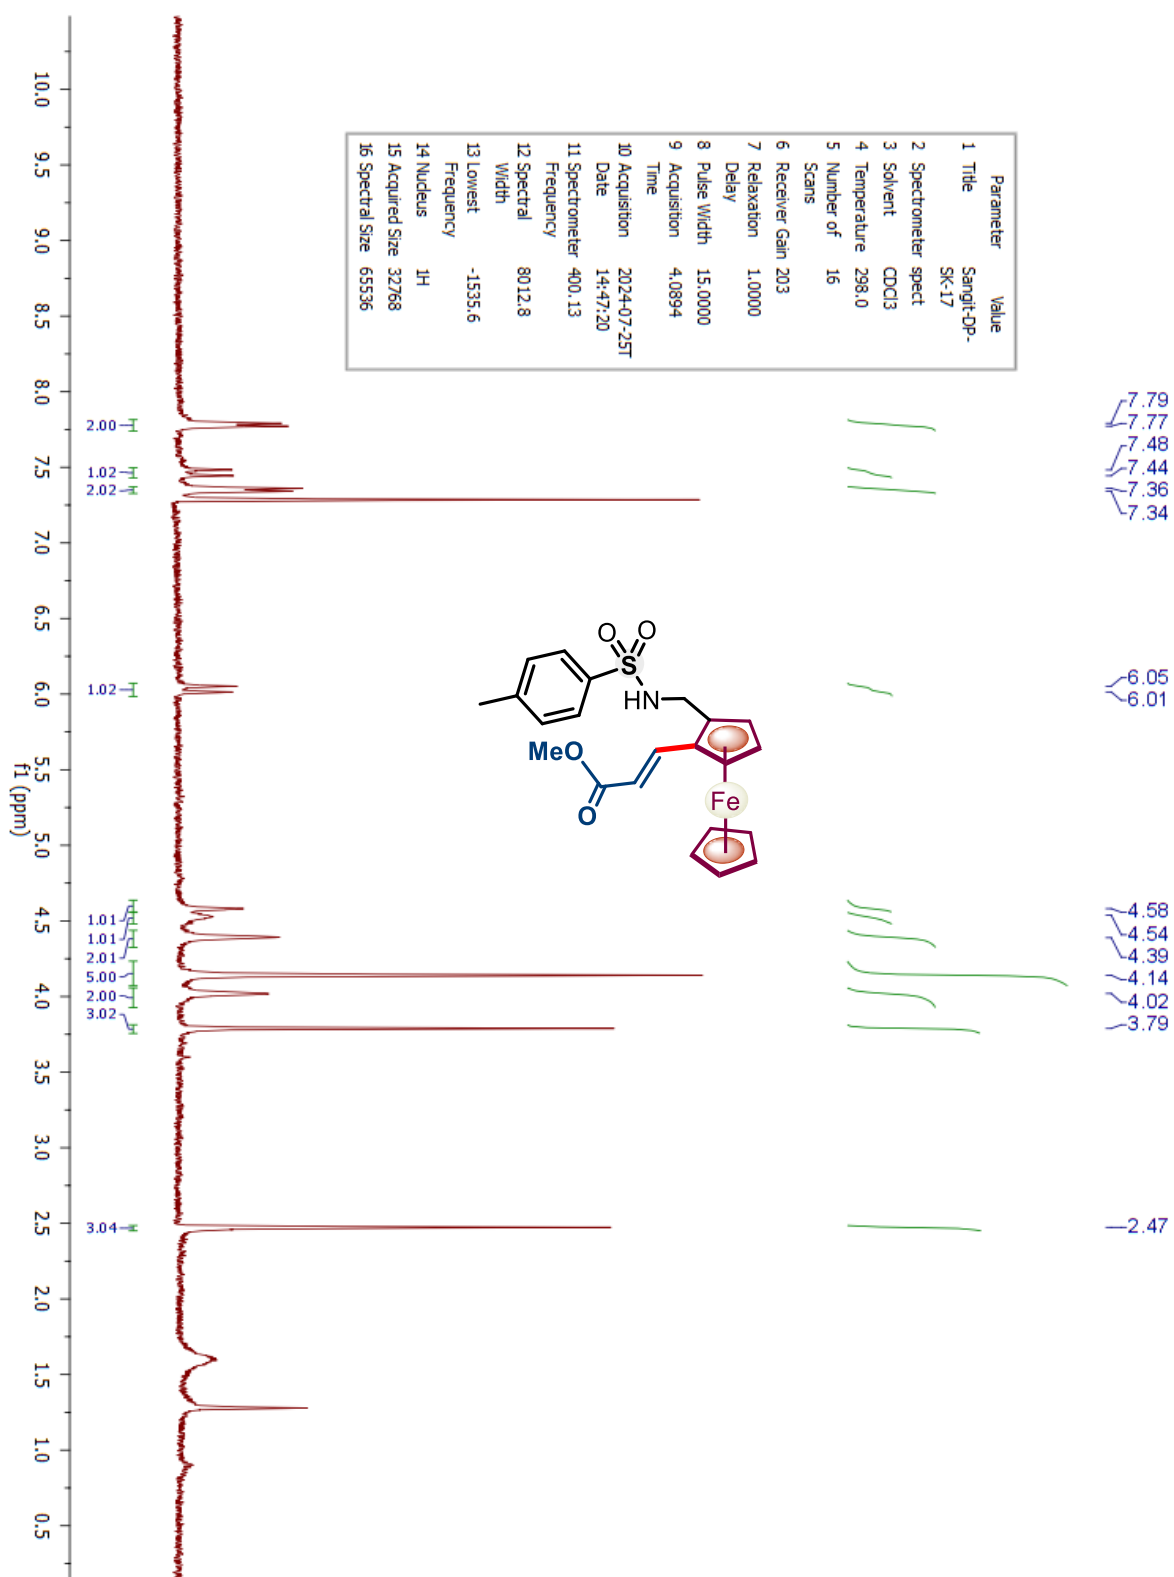

| Parameter            | Value               |
|----------------------|---------------------|
| 1 Title              | Samgit-CP-SK-17     |
| 2 Spectrometer spect |                     |
| 3 Solvent            | CDCl3               |
| 4 Temperature        | 298.0               |
| 5 Number of Scans    | 16                  |
| 6 Receiver Gain      | 203                 |
| 7 Relaxation Delay   | 1.0000              |
| 8 Pulse Width        | 15.0000             |
| 9 Acquisition Time   | 4.0894              |
| 10 Acquisition Date  | 2024-07-25T14:47:20 |
| 11 Spectrometer      | 400, 13             |
| 12 Spectral Width    | 8012.8              |
| 13 Lowest Frequency  | -1535.6             |
| 14 Nucleus           | <sup>1</sup> H      |
| 15 Acquired Size     | 32768               |
| 16 Spectral Size     | 65536               |

# $^{13}\text{C}\{^1\text{H}\}$ NMR Spectrum of **4c**

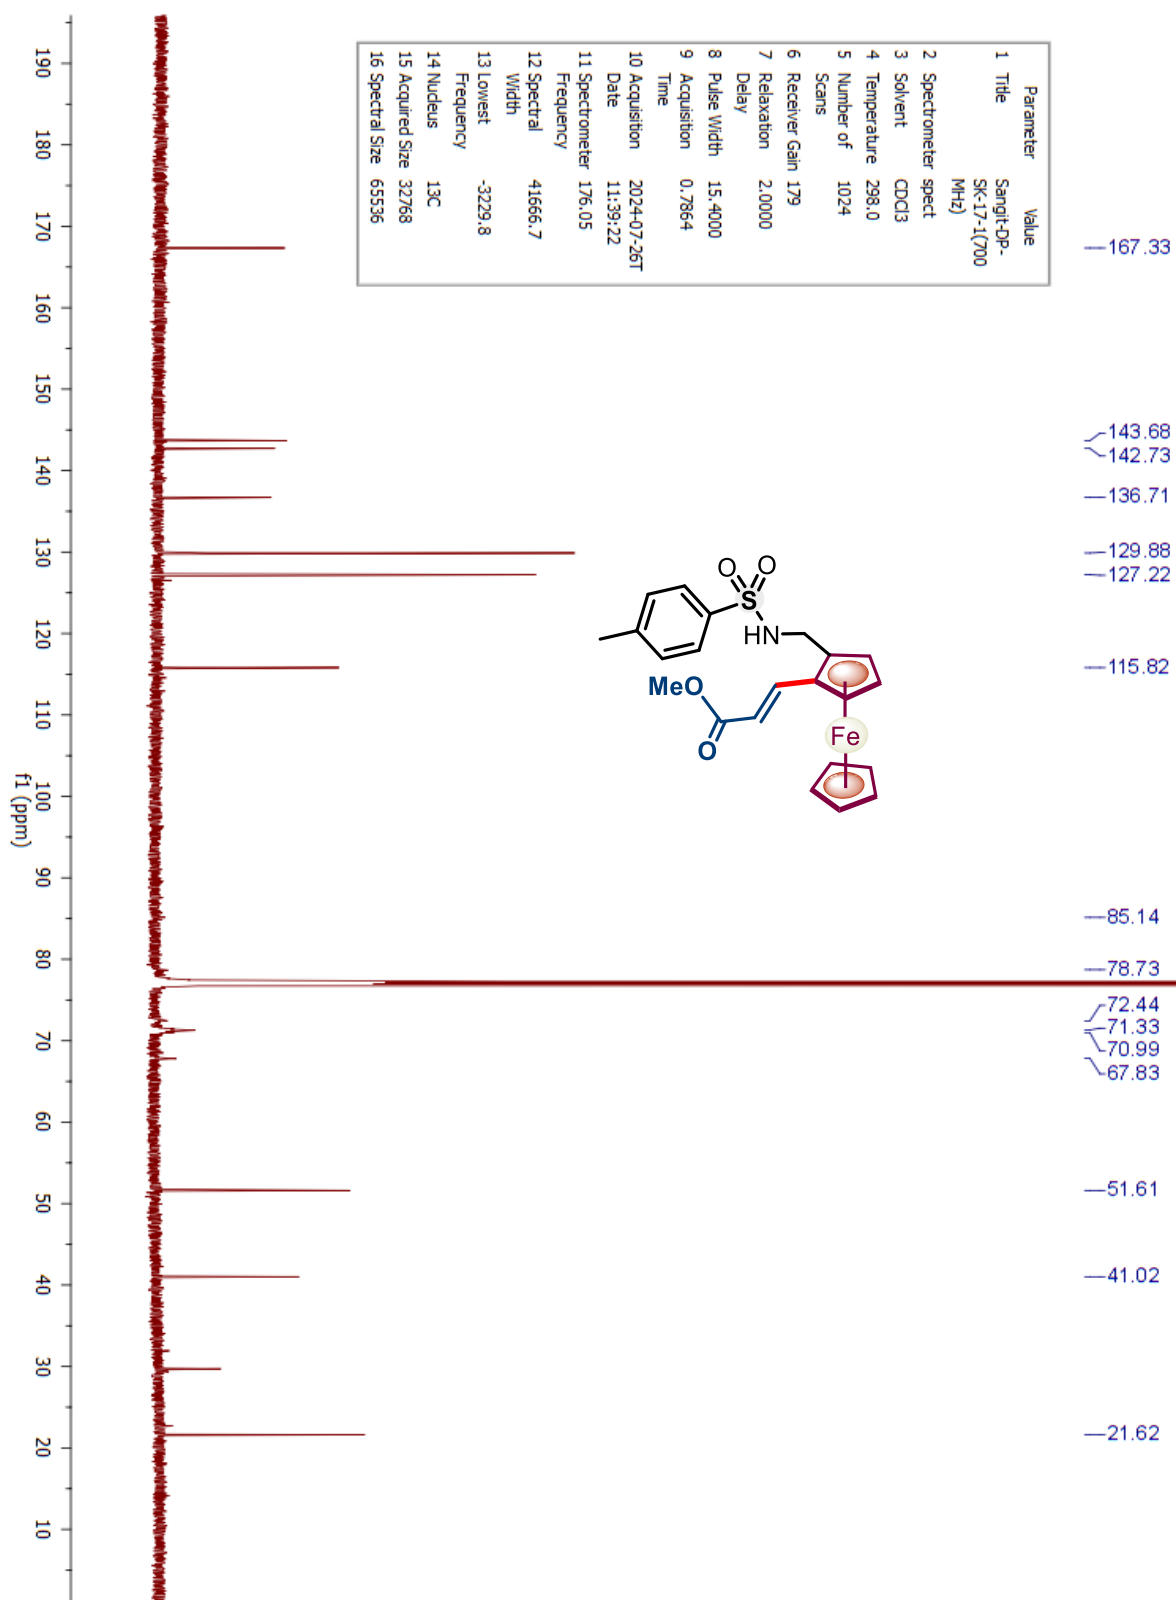

<sup>1</sup>H NMR Spectrum of **4d**

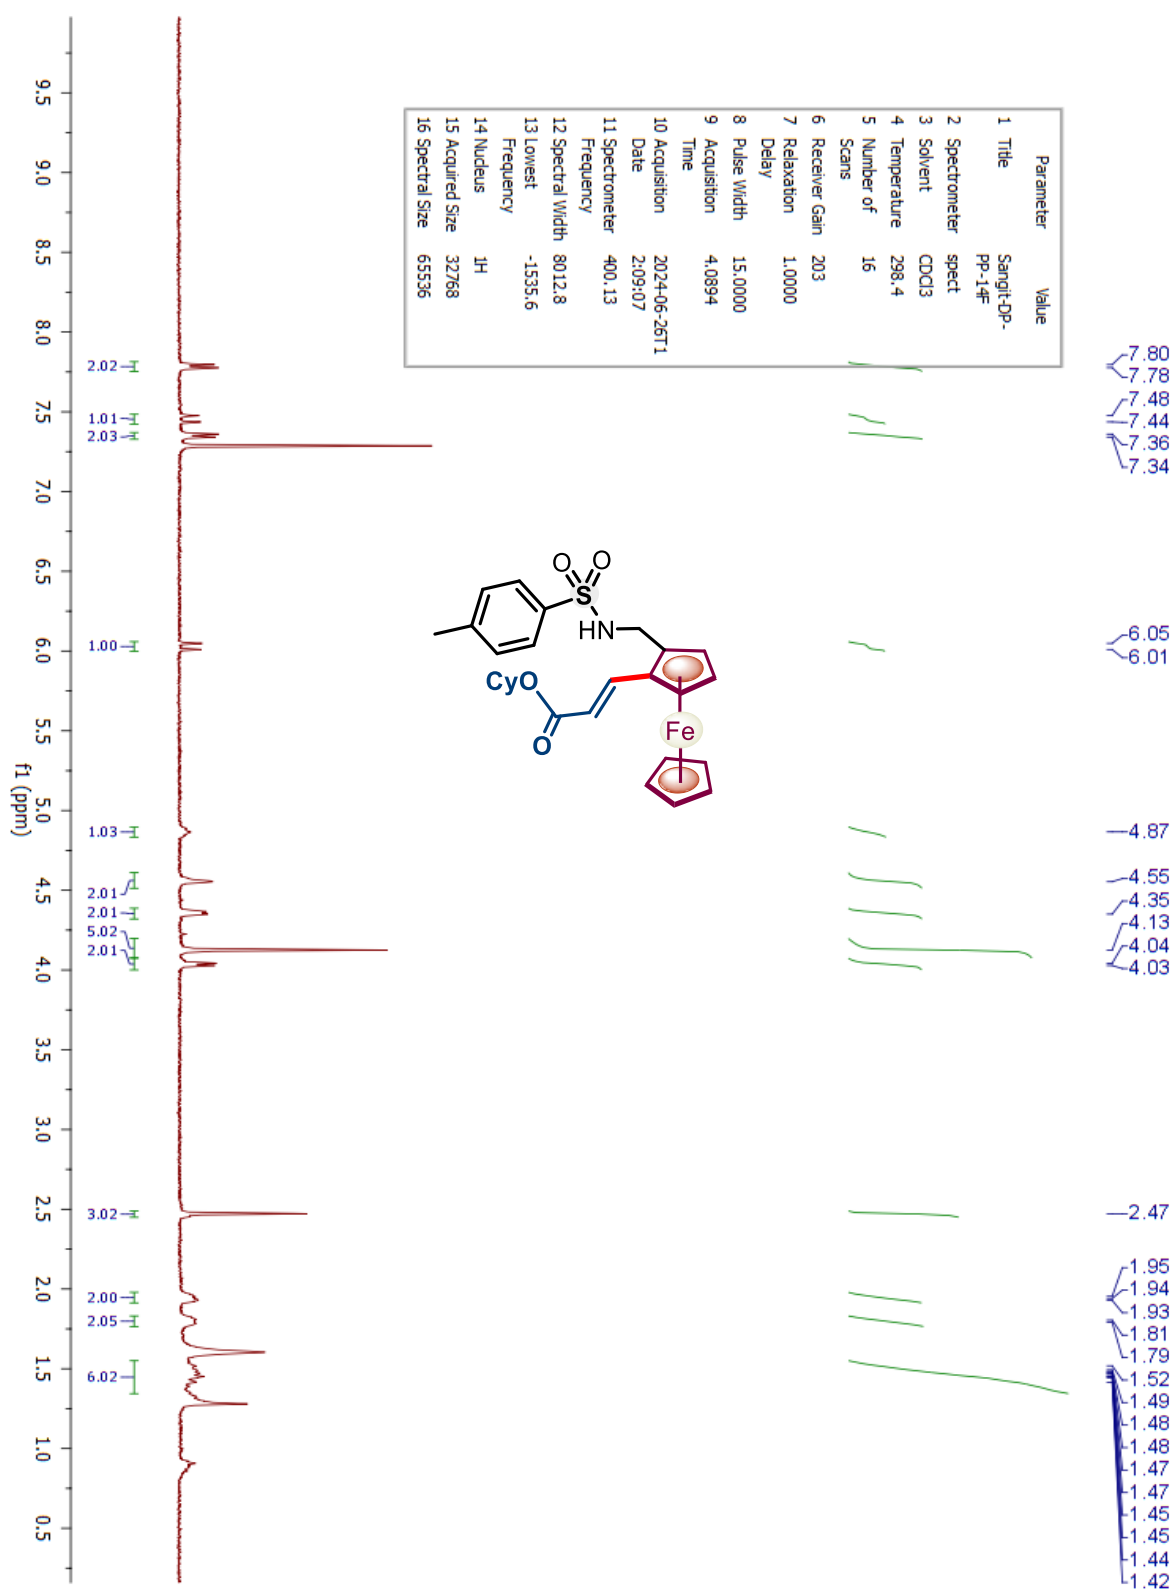



# $^{13}\text{C}\{^1\text{H}\}$ NMR Spectrum of **4d**

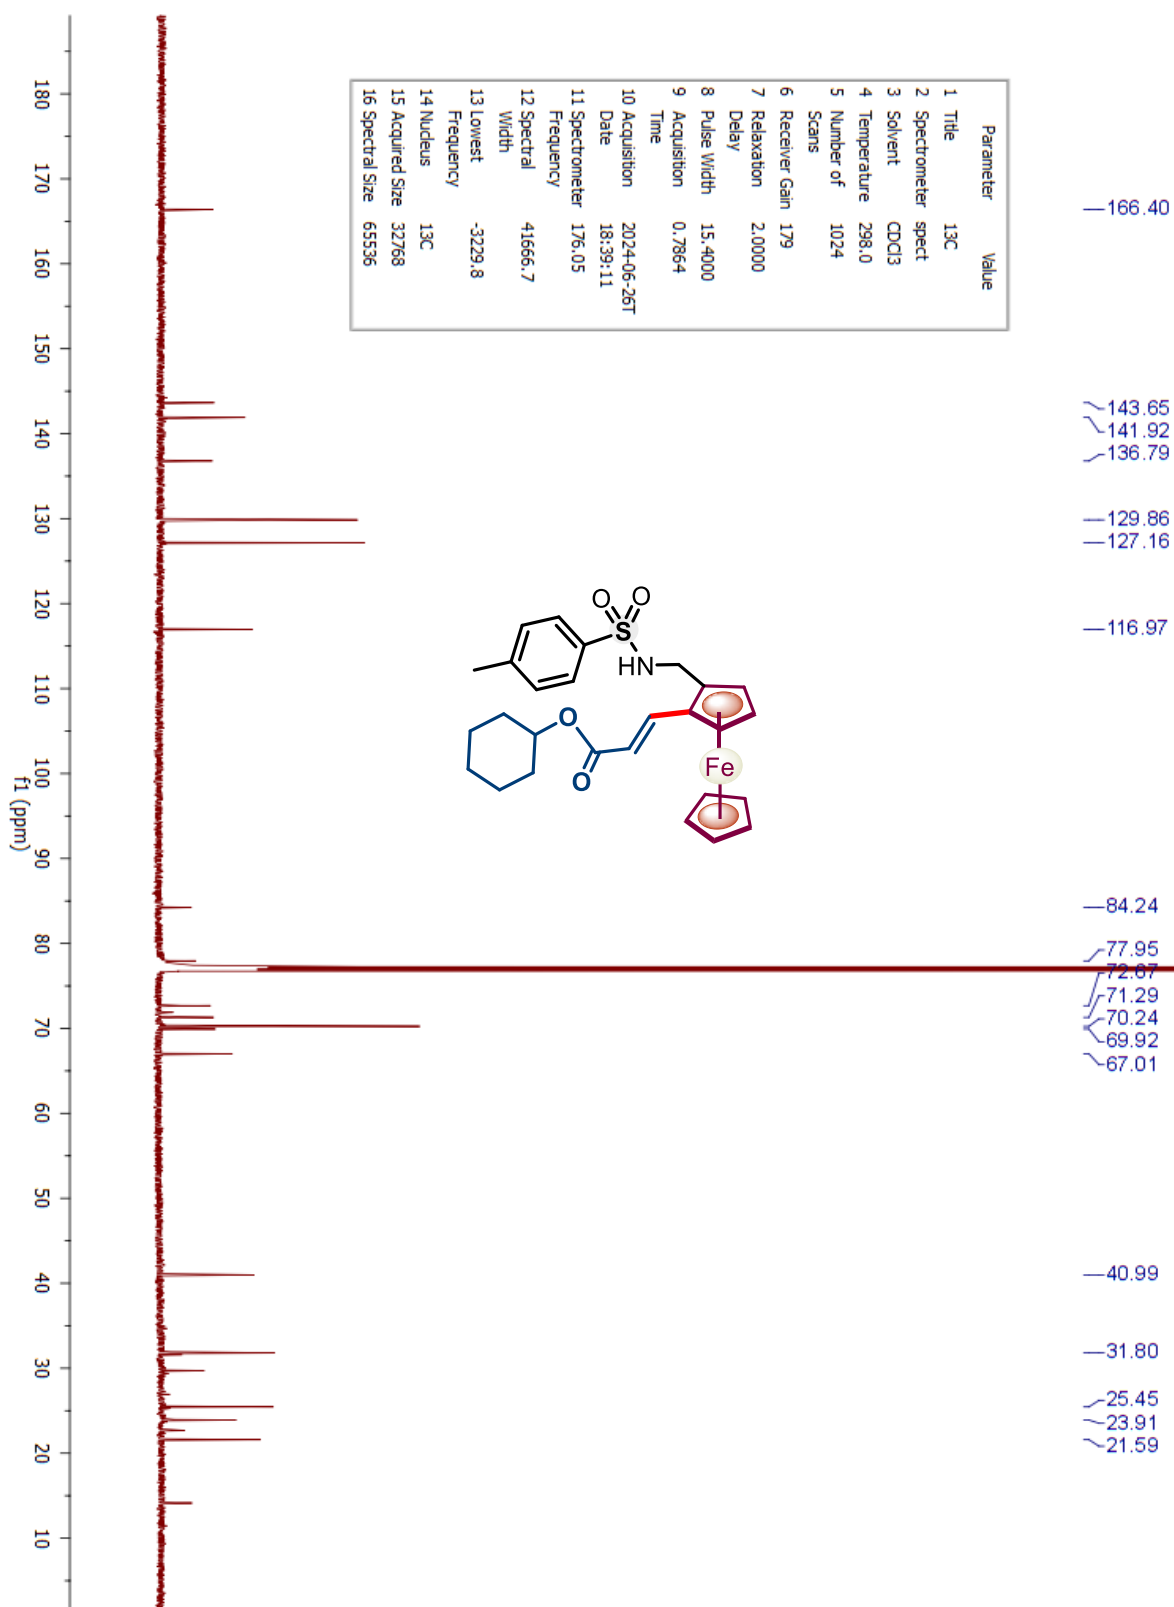

<sup>1</sup>H NMR Spectrum of **4e**

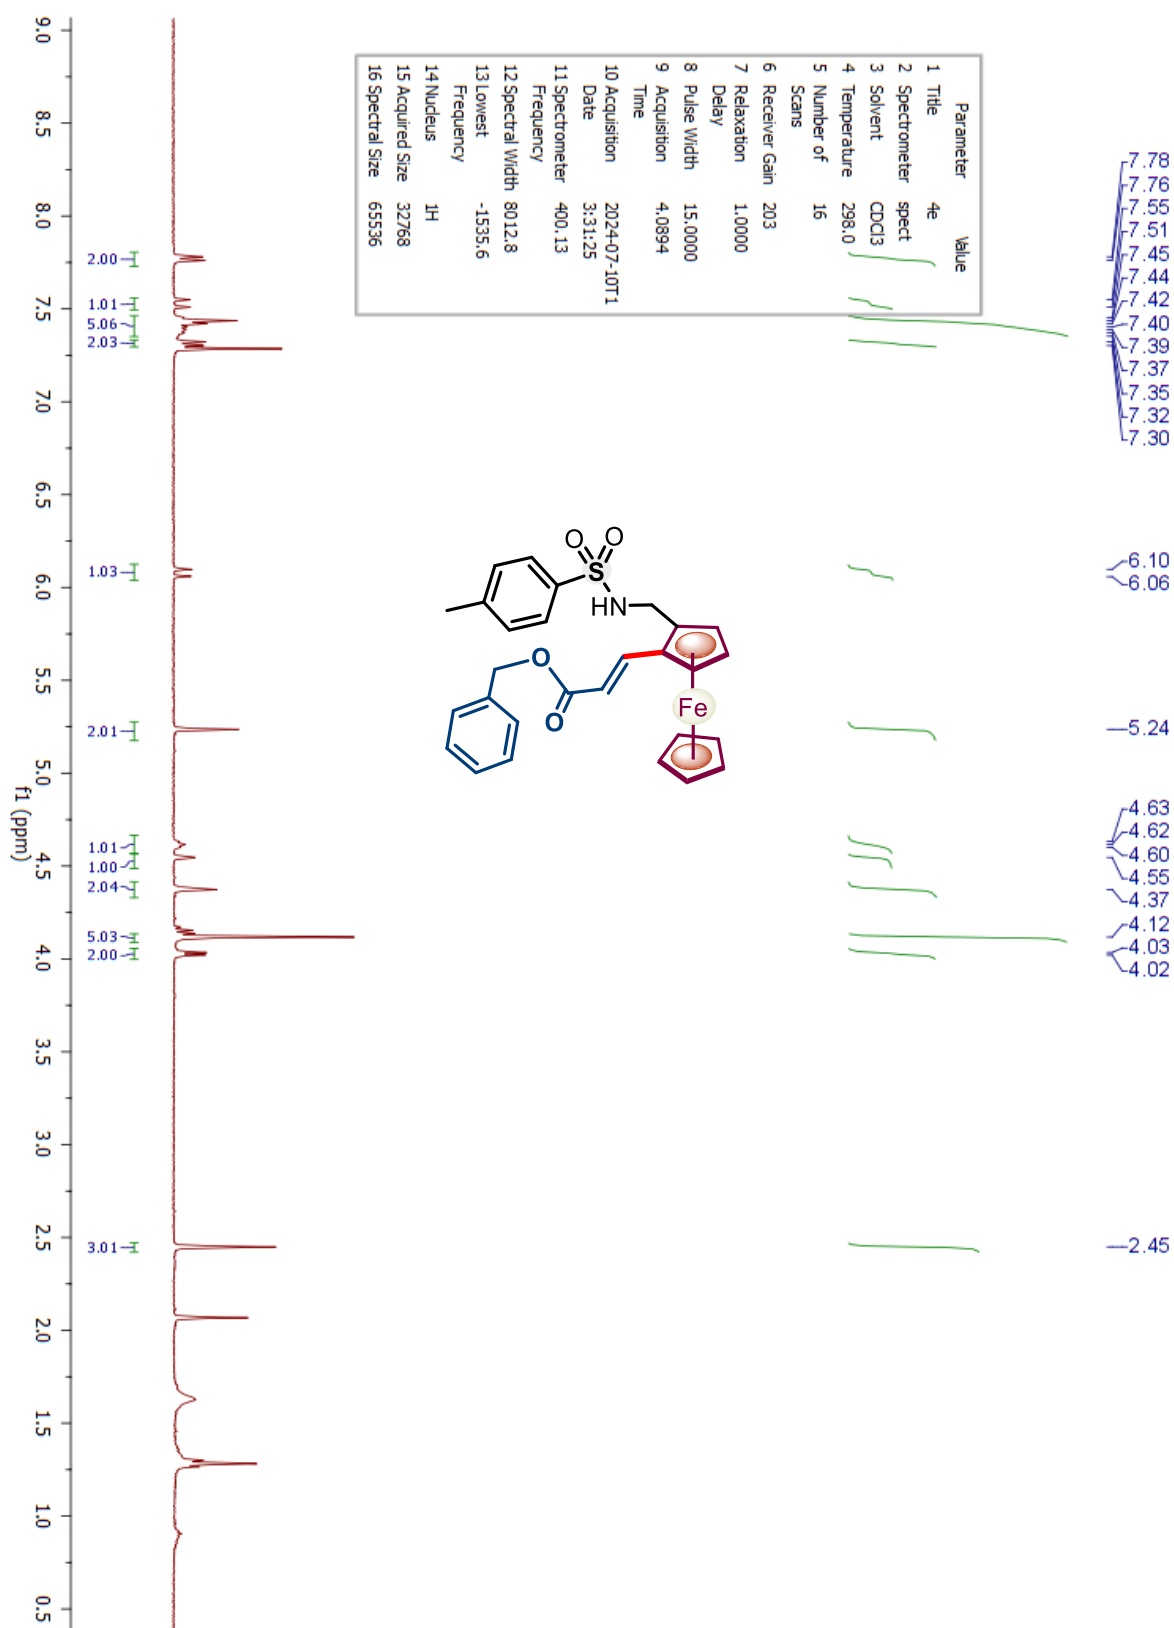

# $^{13}\text{C}\{^1\text{H}\}$ NMR Spectrum of **4e**

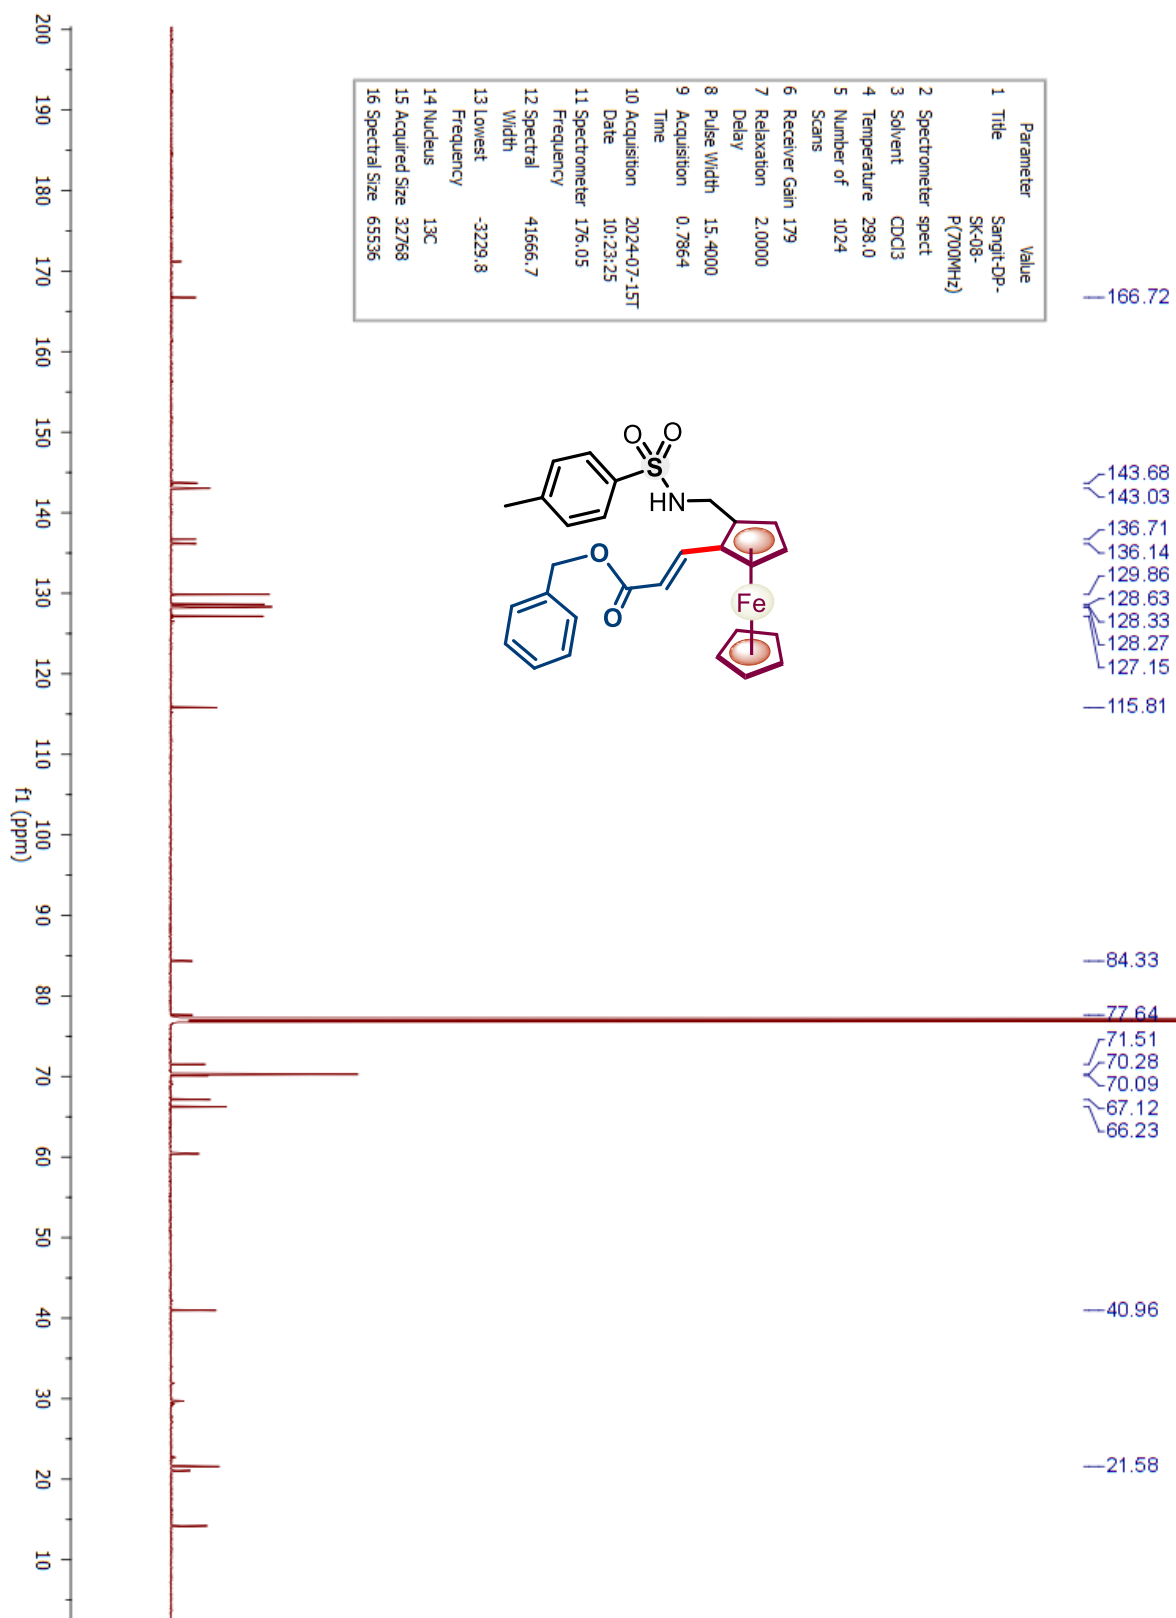

# <sup>1</sup>H NMR Spectrum of **4f**

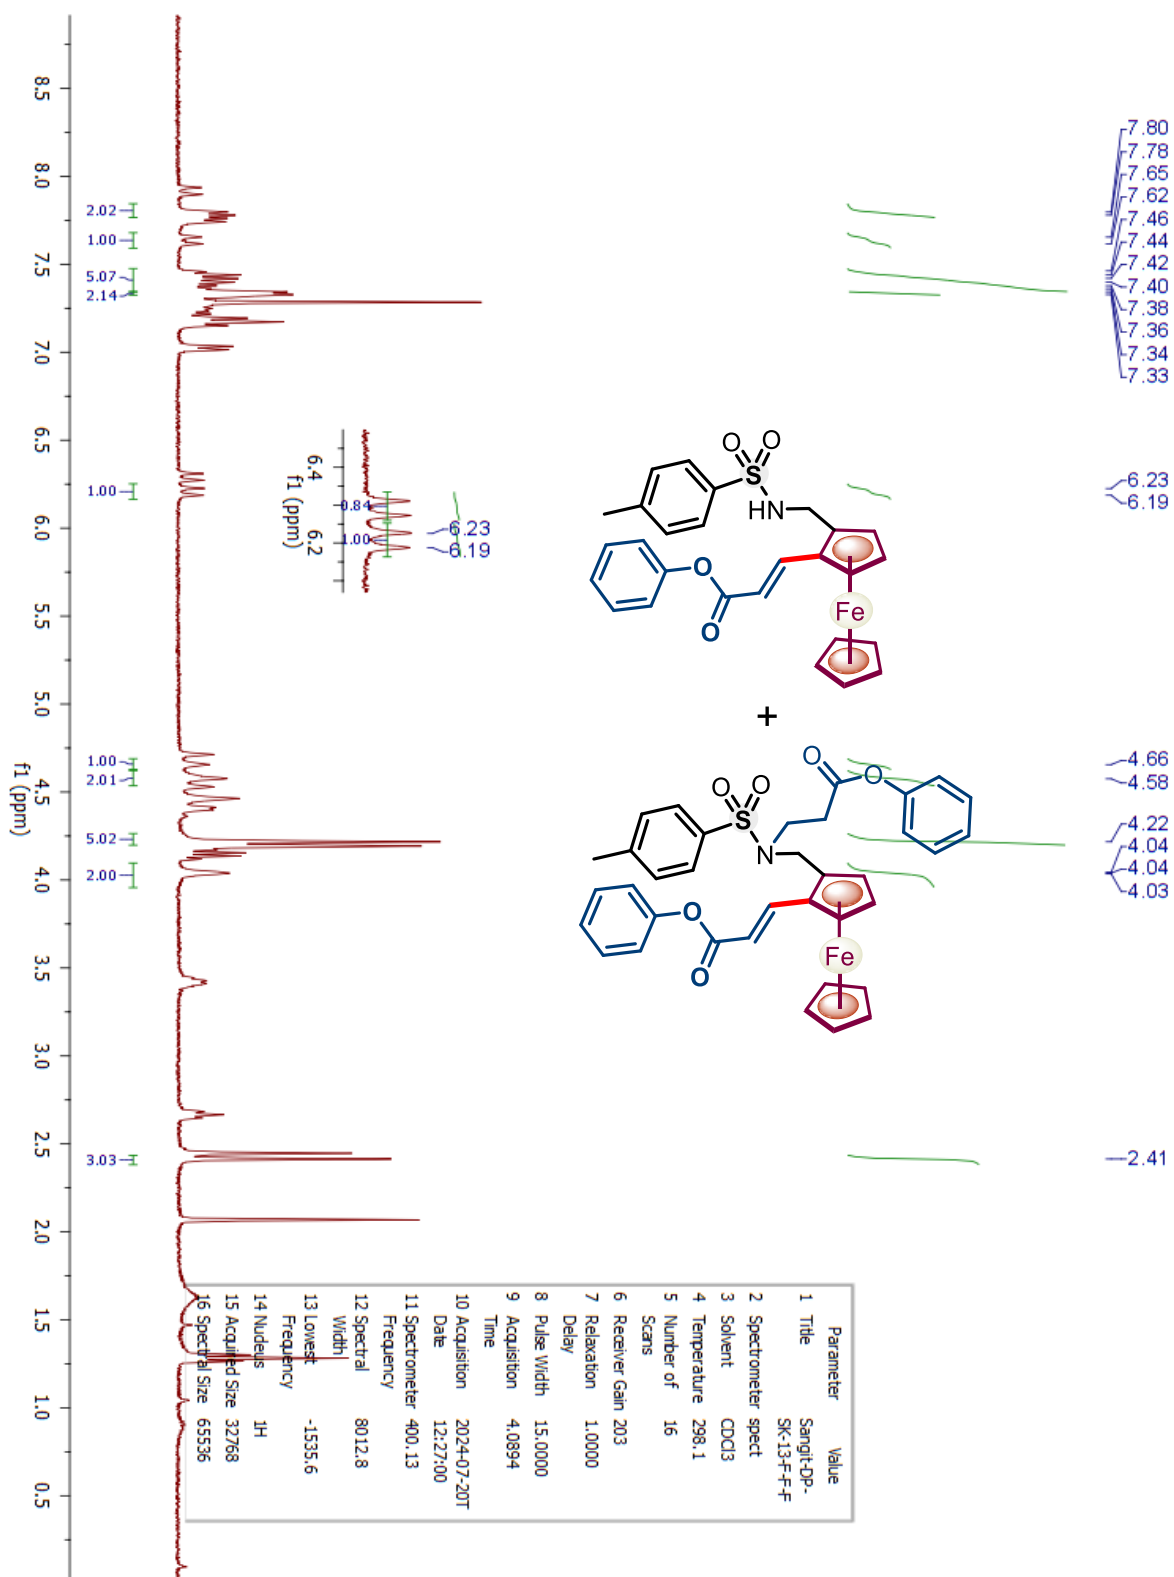

$^{13}\text{C}\{^1\text{H}\}$  NMR Spectrum of **4f**

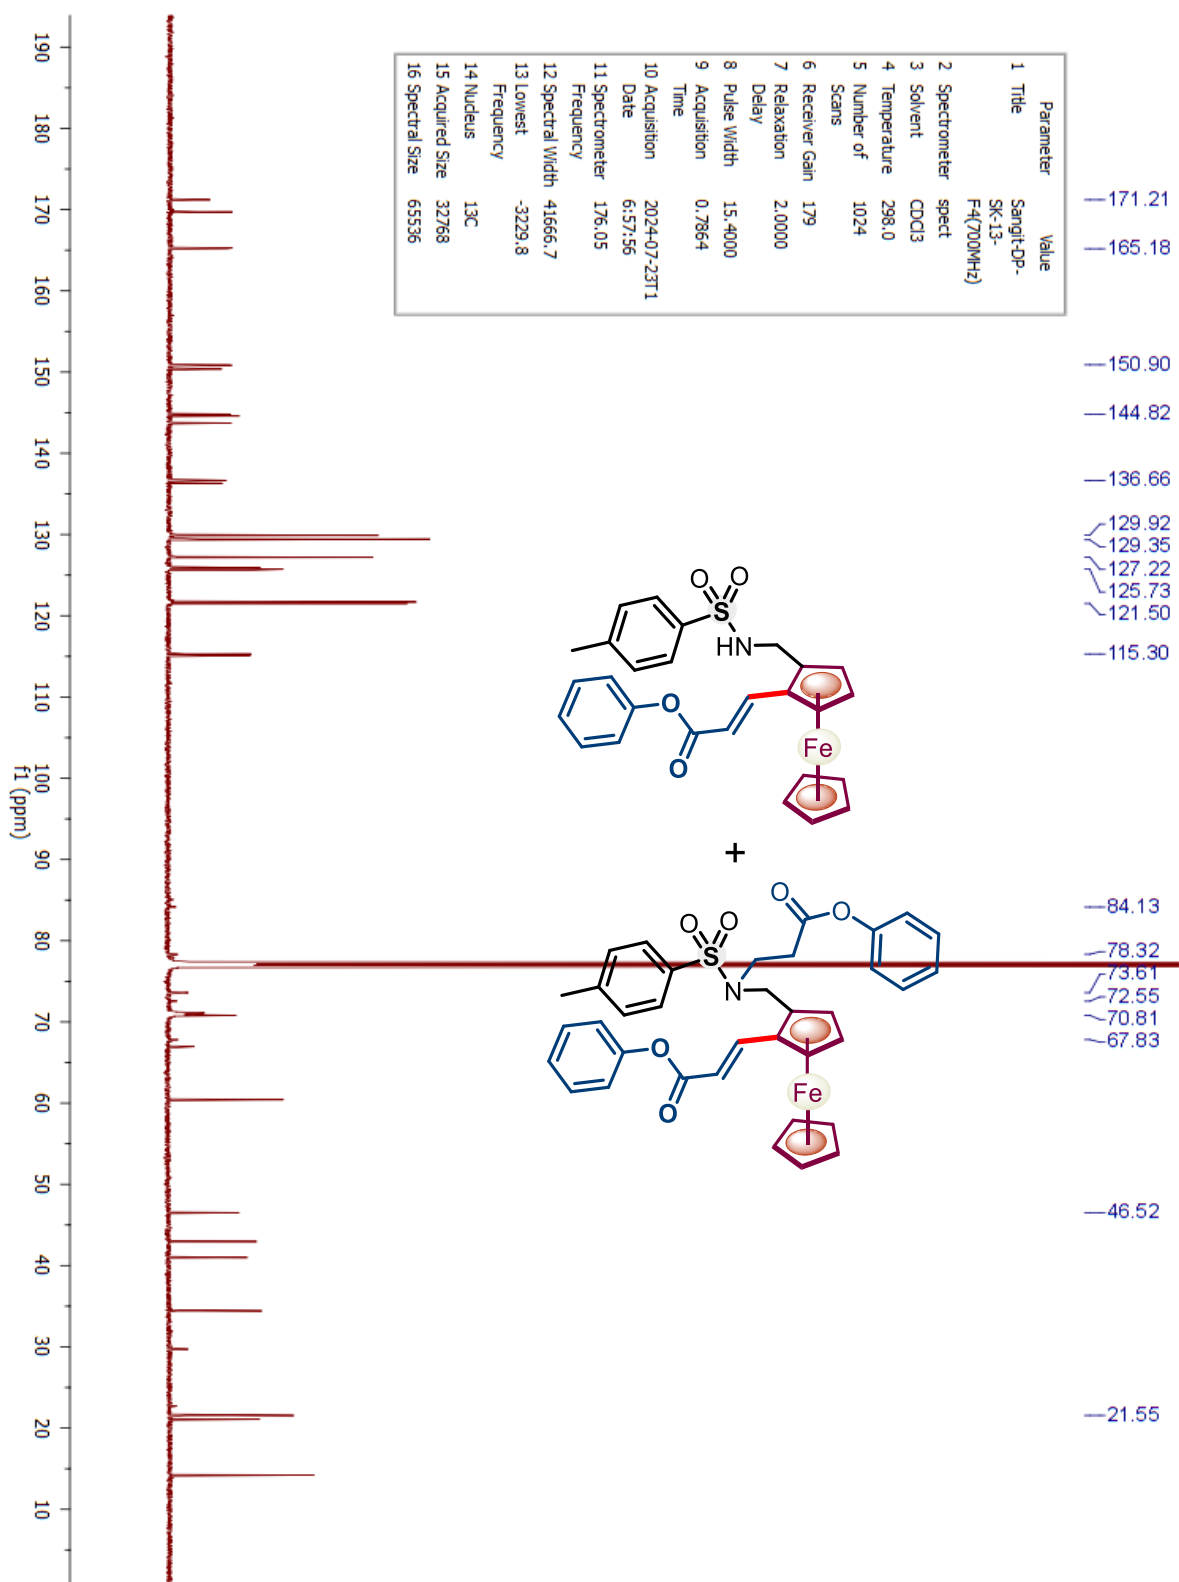

# <sup>1</sup>H NMR Spectrum of 4g

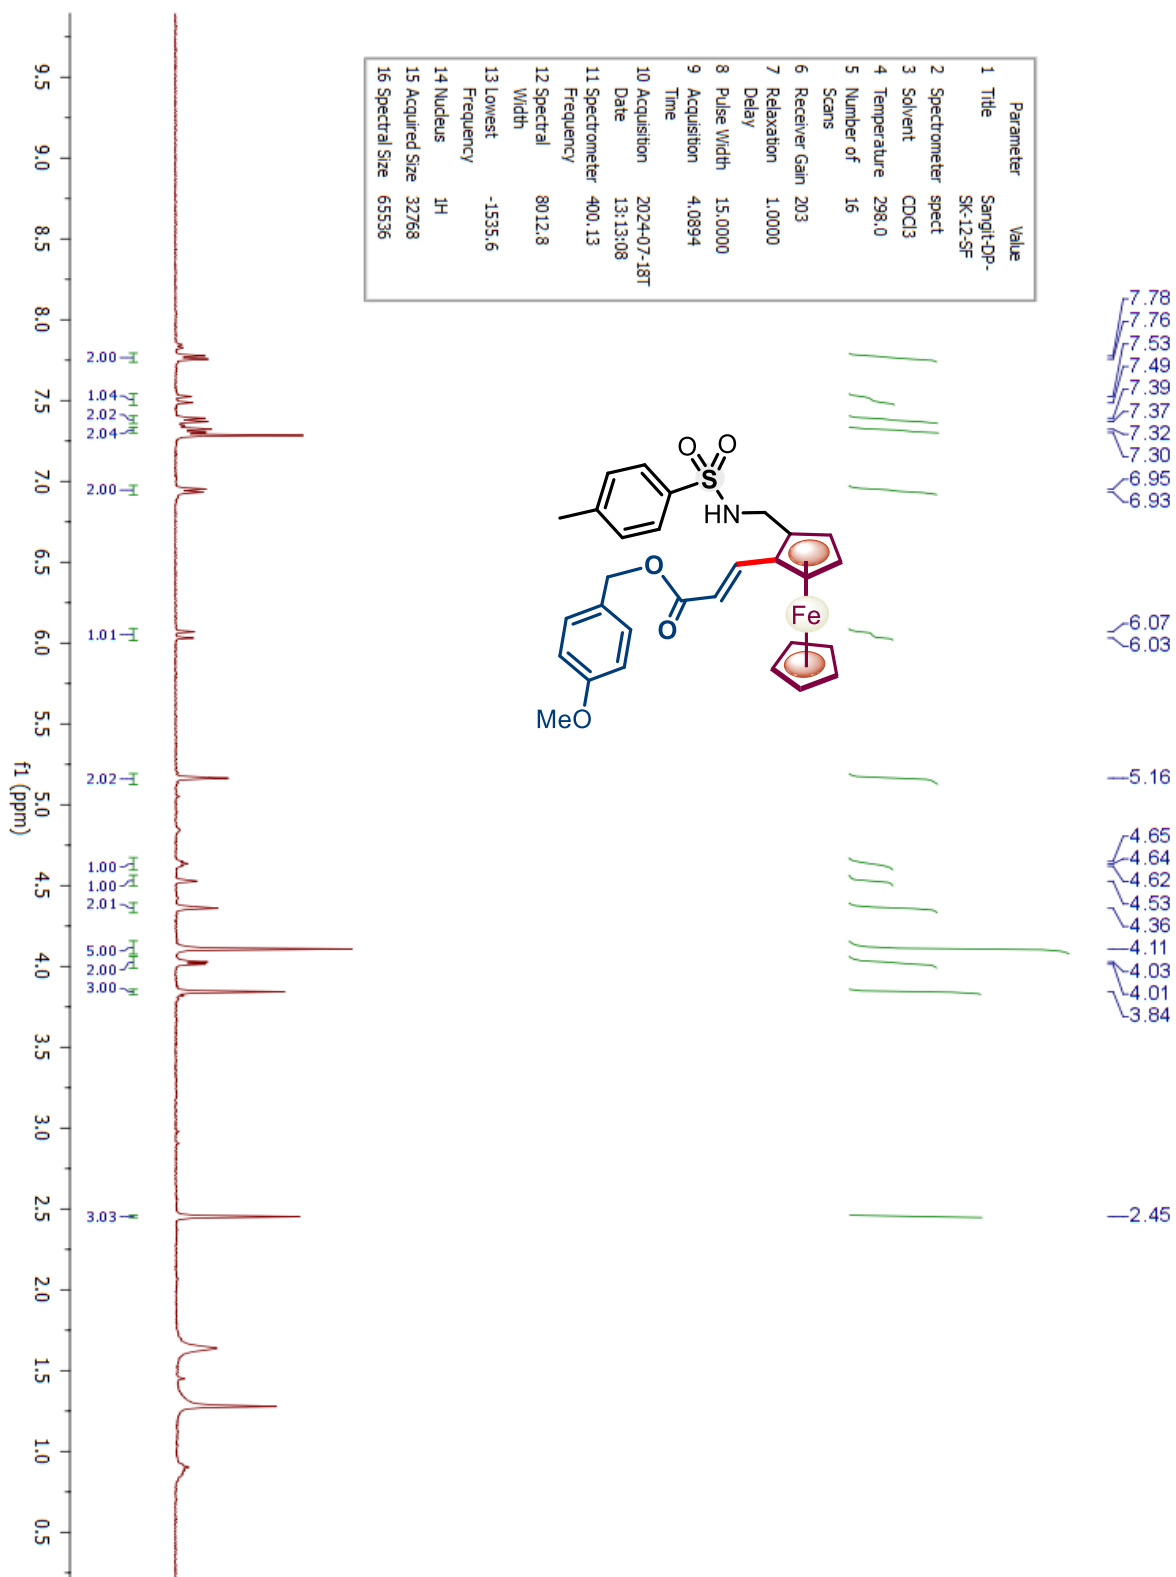

$^{13}\text{C}\{^1\text{H}\}$  NMR Spectrum of **4g**

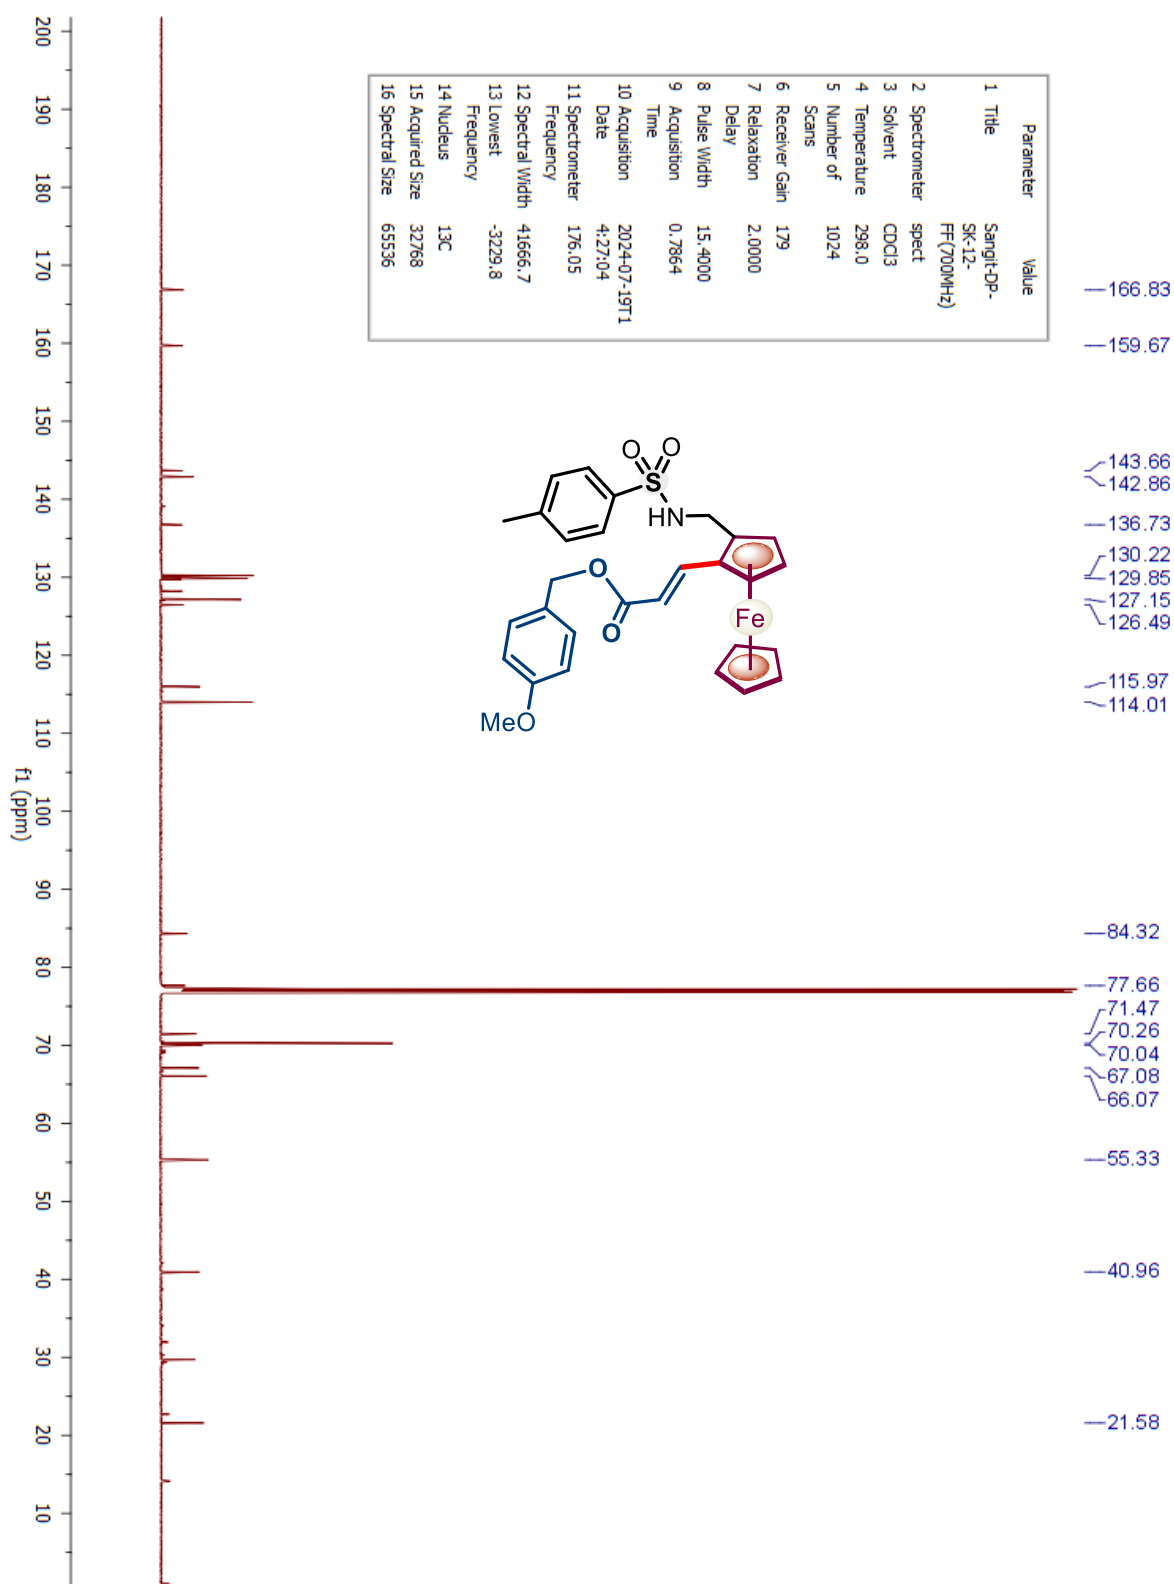

<sup>1</sup>H NMR Spectrum of **4h**

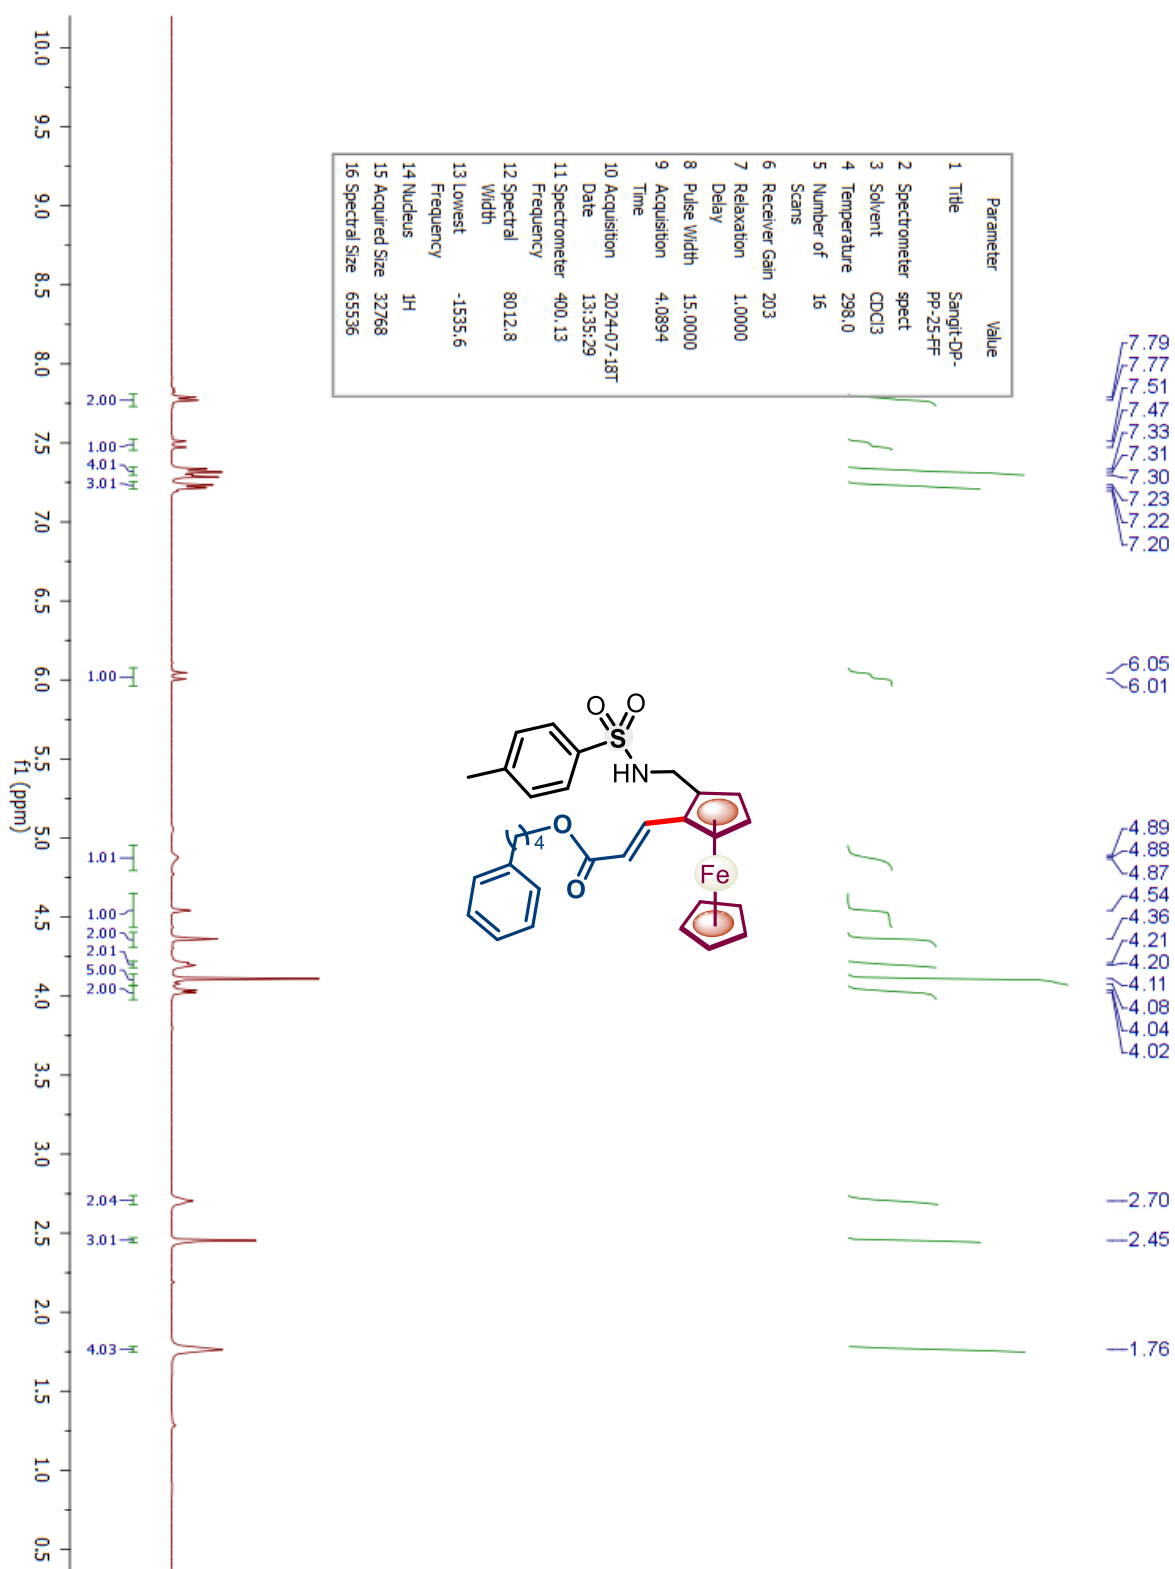



$^{13}\text{C}\{^1\text{H}\}$  NMR Spectrum of **4h**

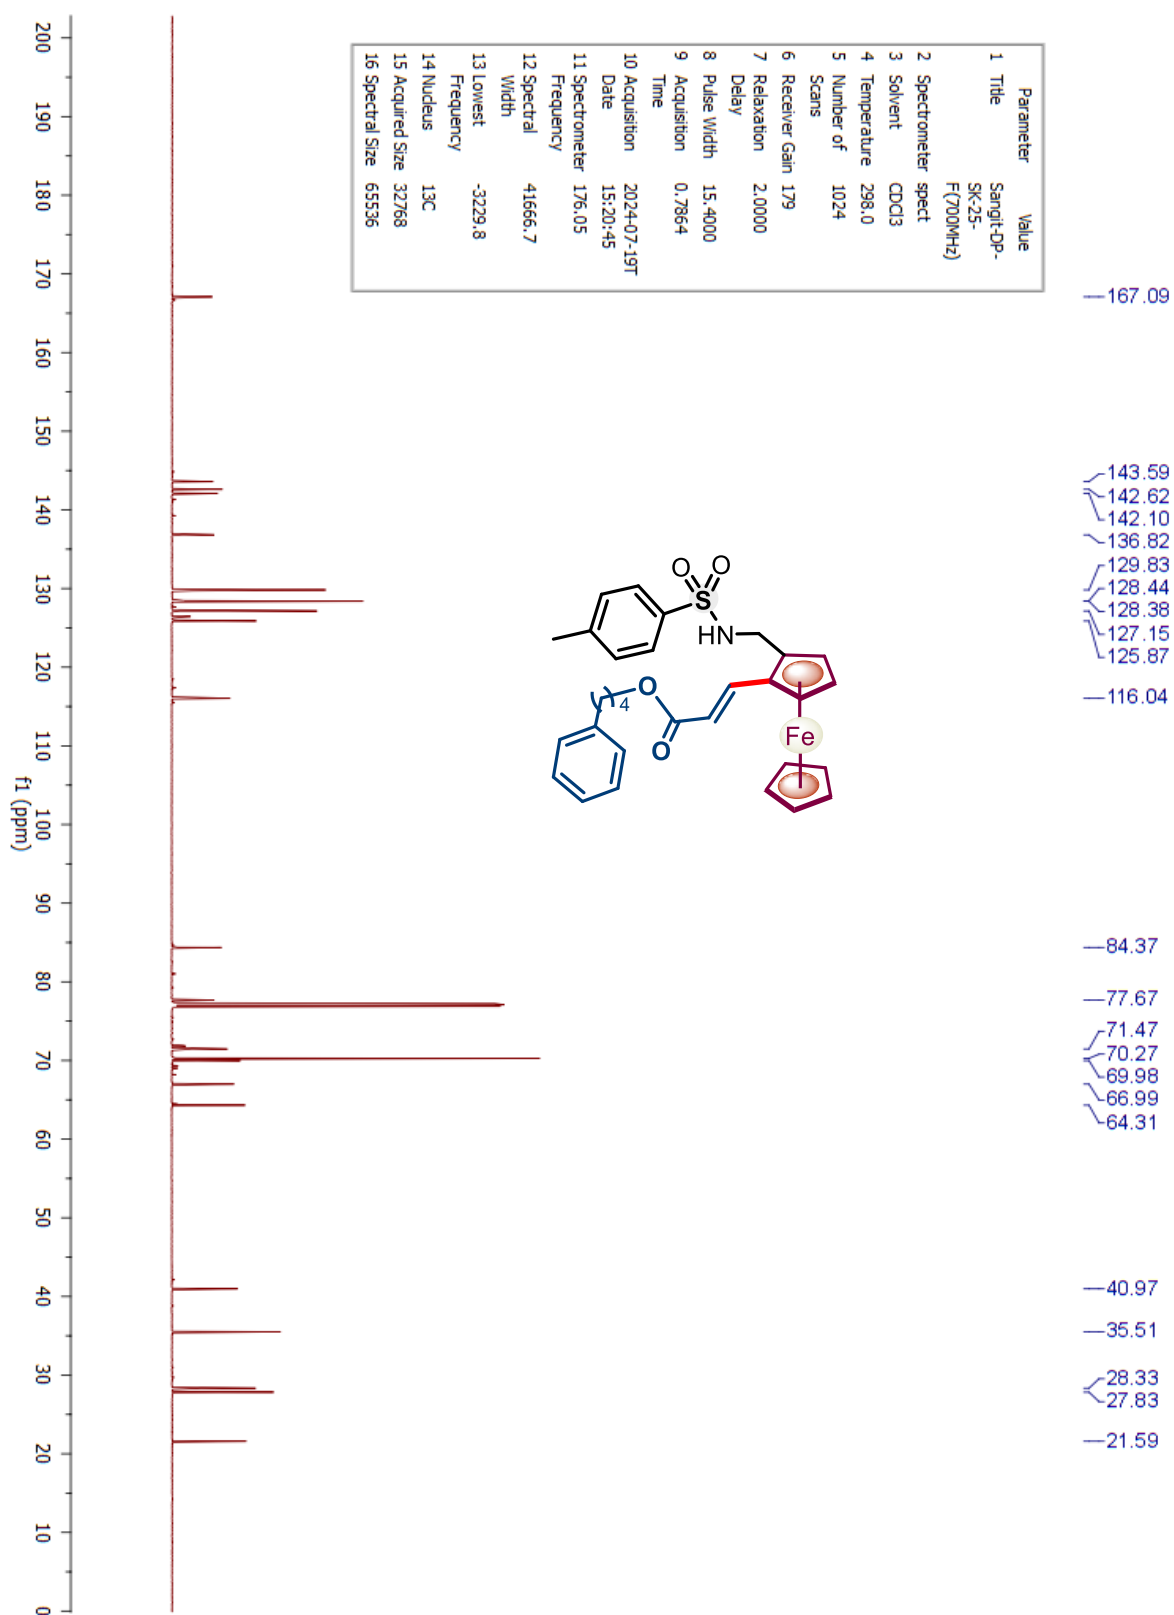

<sup>1</sup>H NMR Spectrum of **4i**

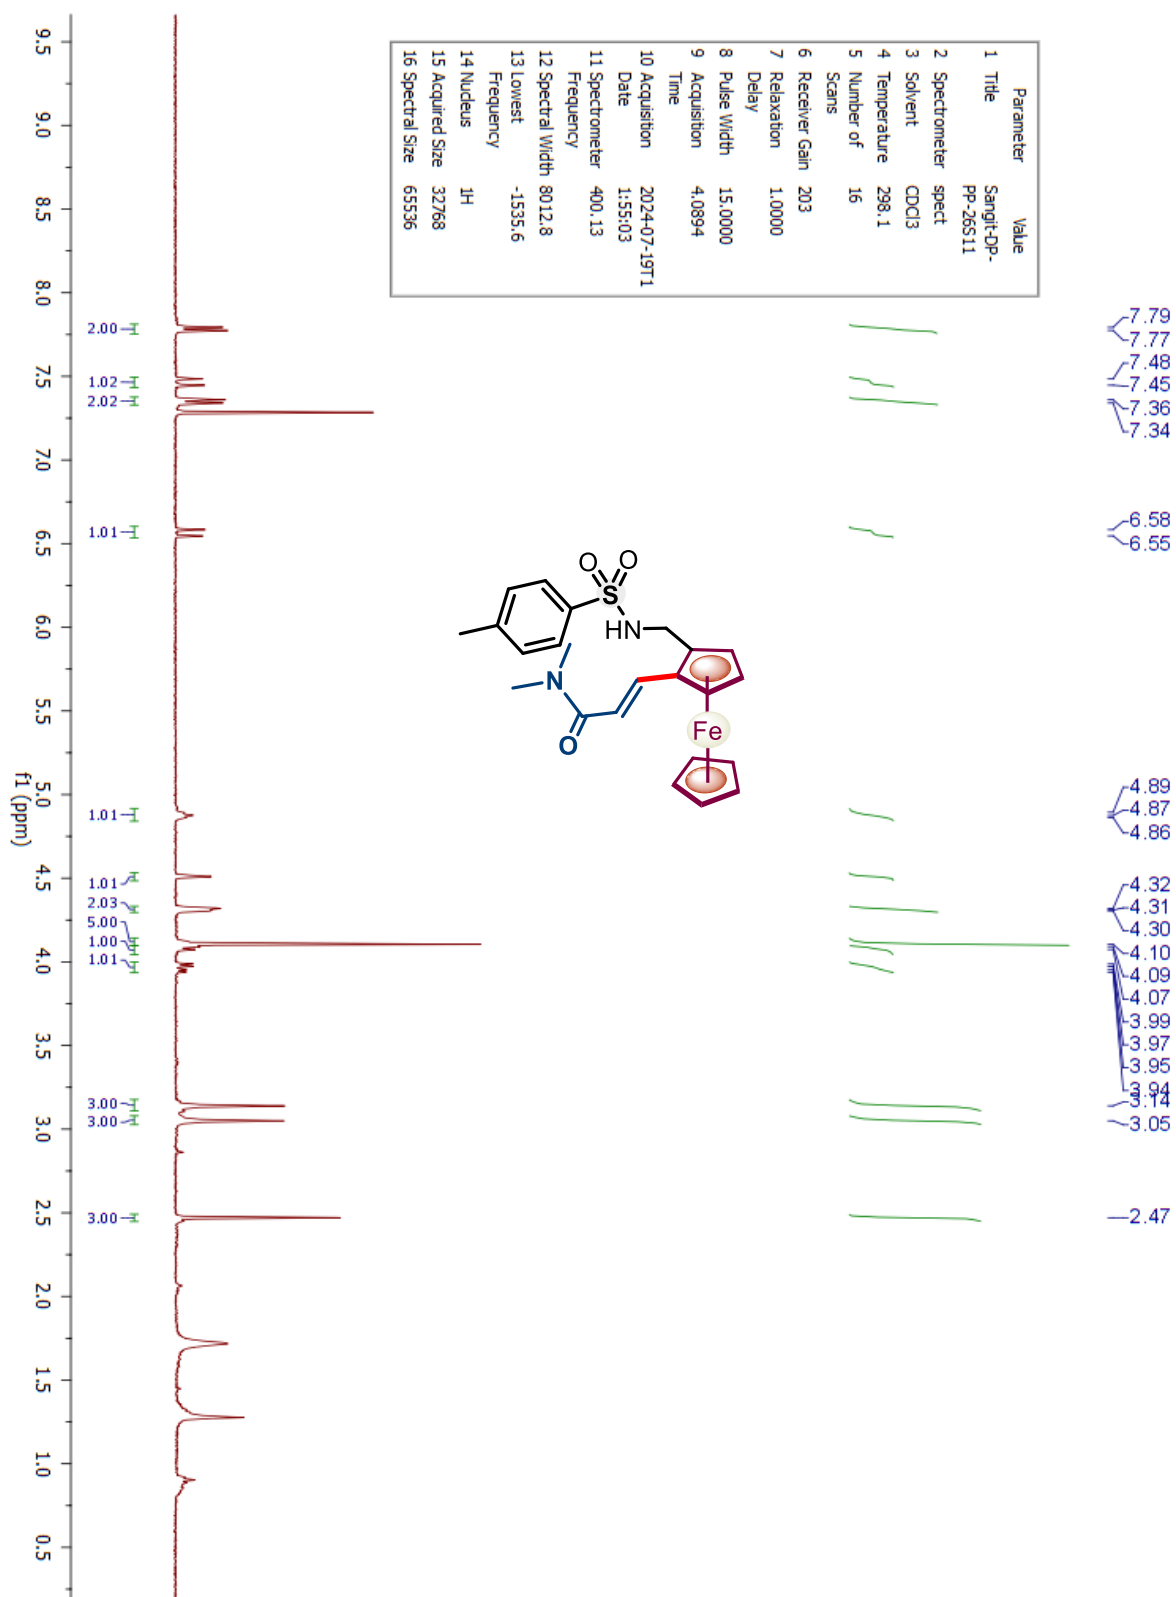

$^{13}\text{C}\{^1\text{H}\}$  NMR Spectrum of **4i**

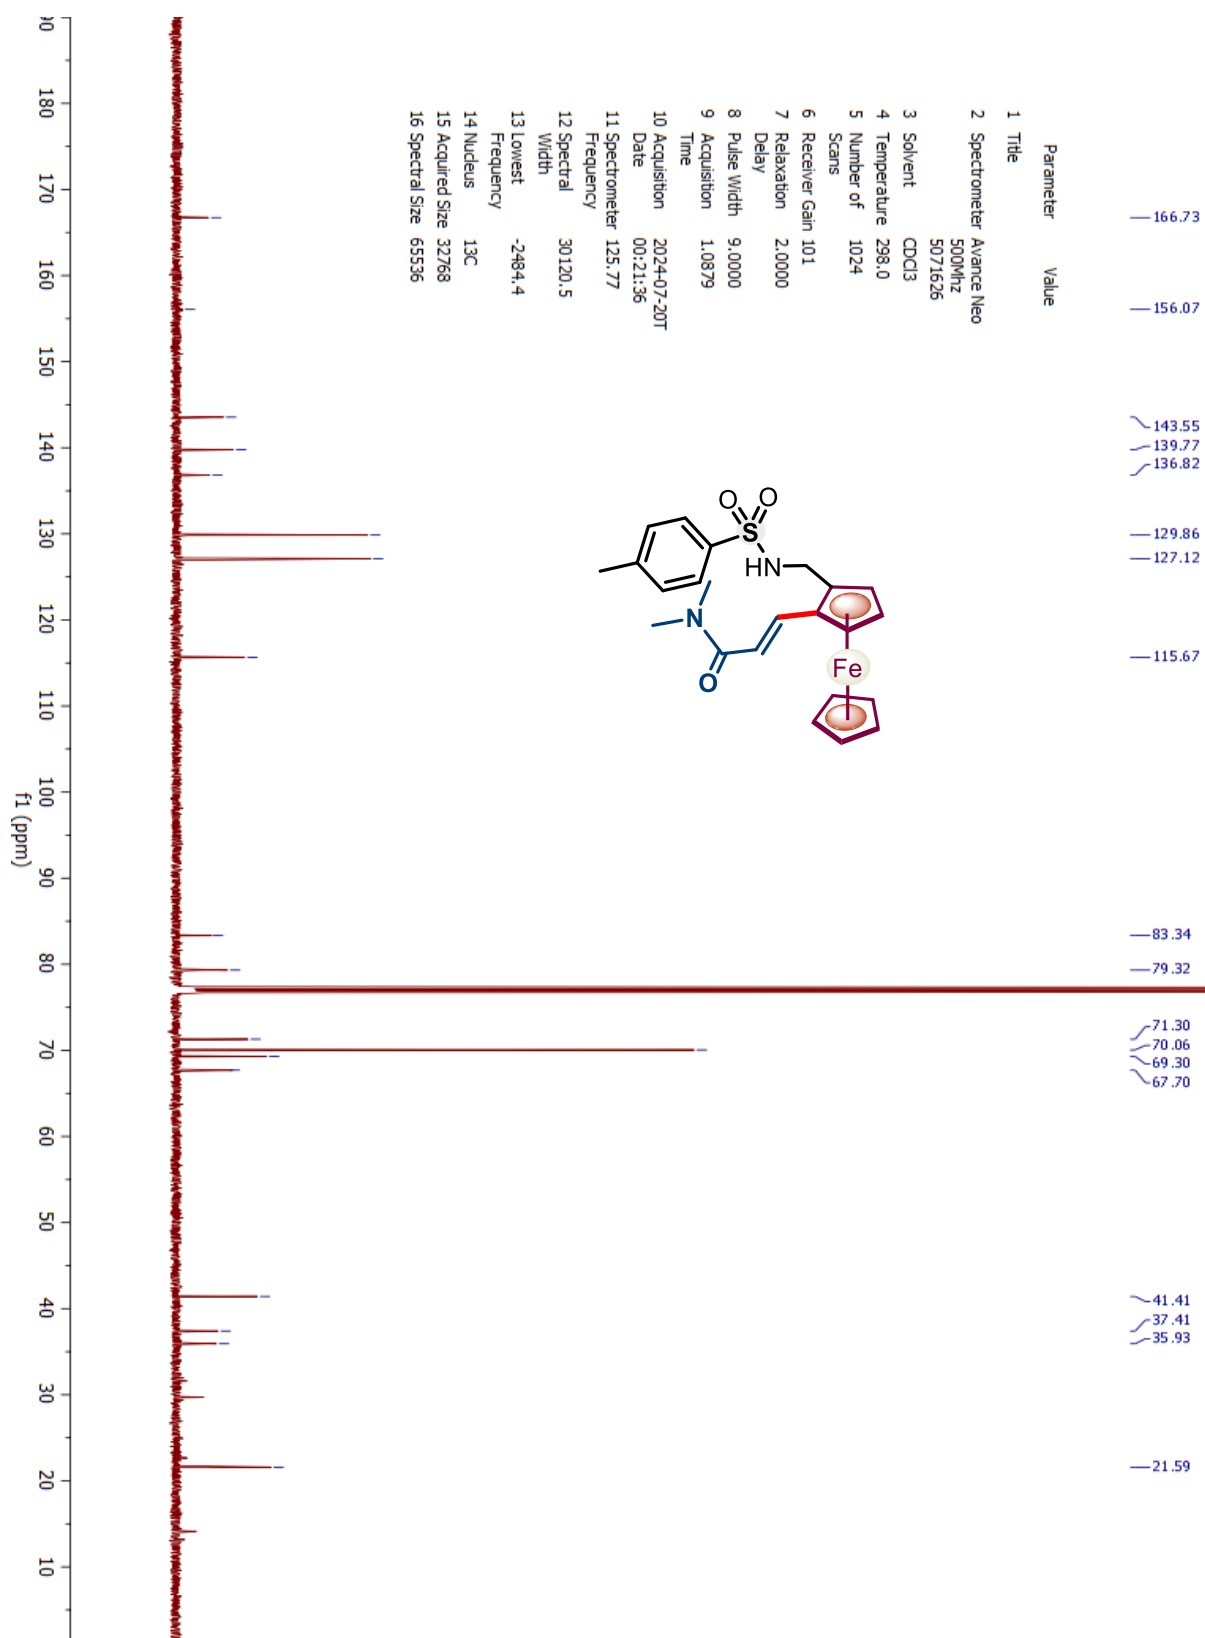

<sup>1</sup>H NMR Spectrum of **4j**

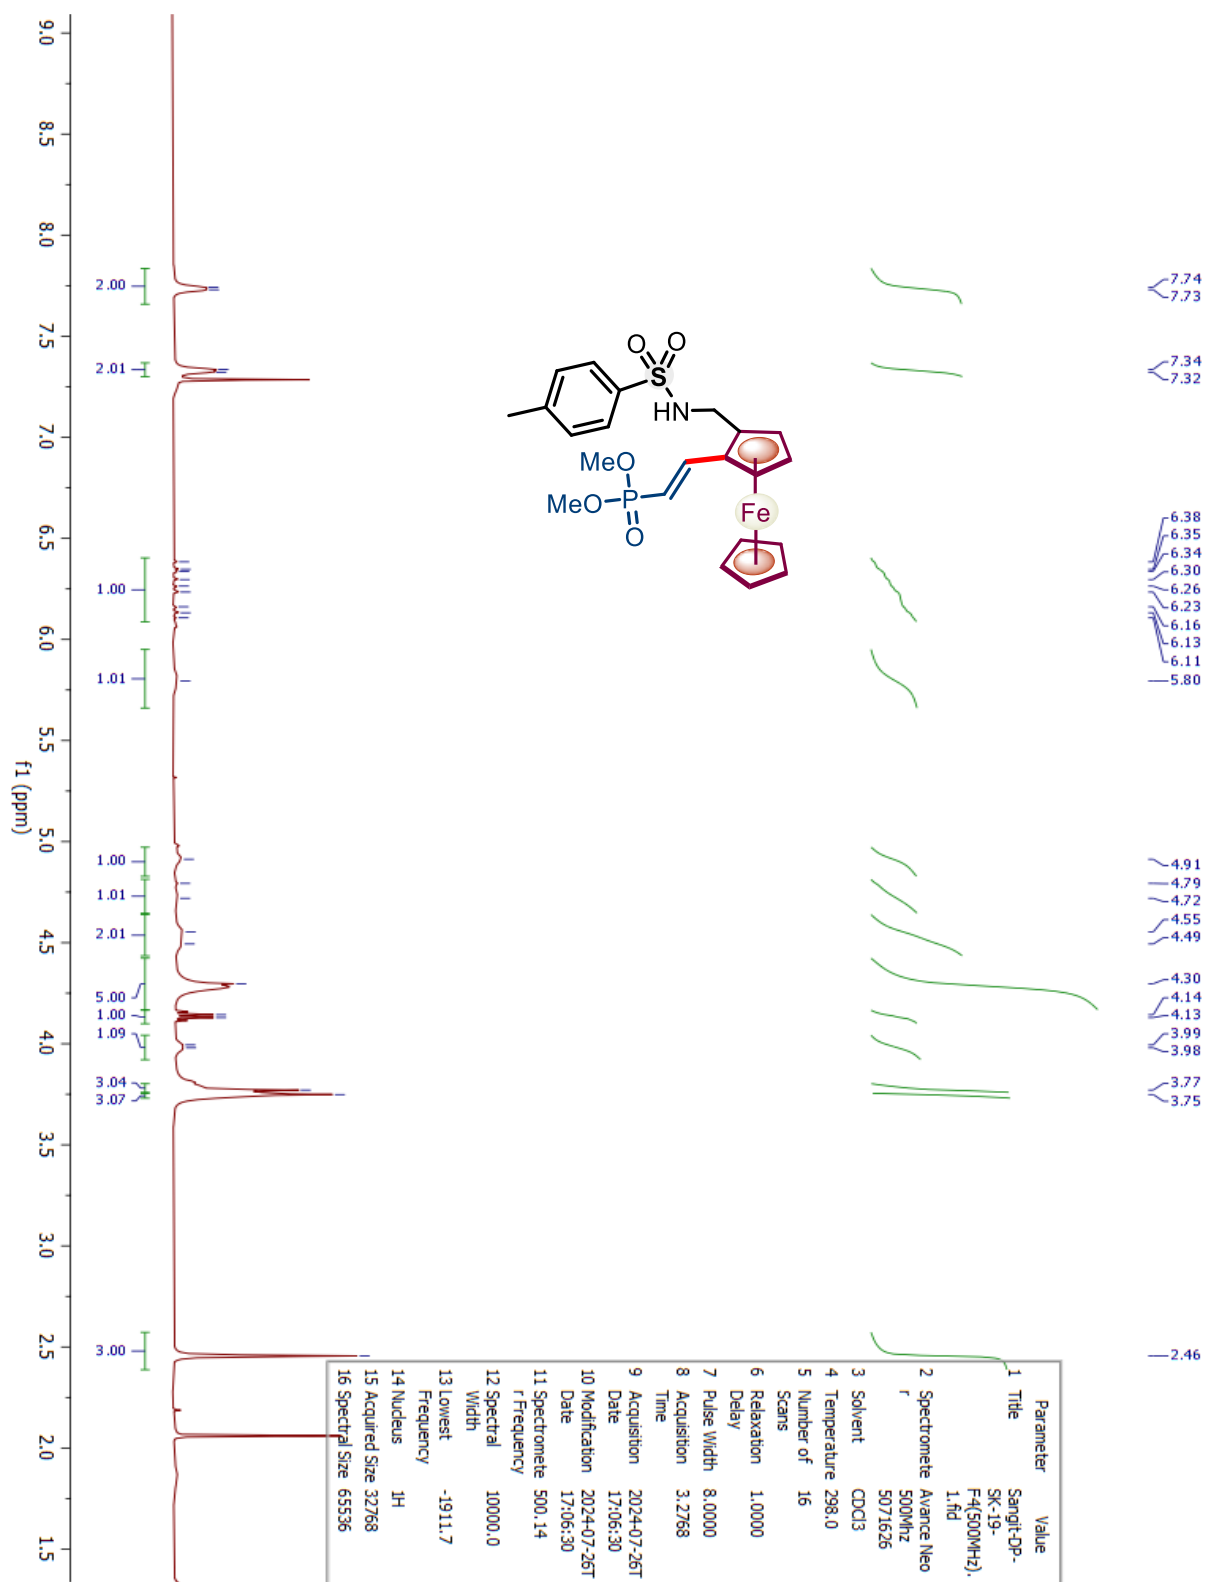

$^{13}\text{C}\{^1\text{H}\}$  NMR Spectrum of **4j**

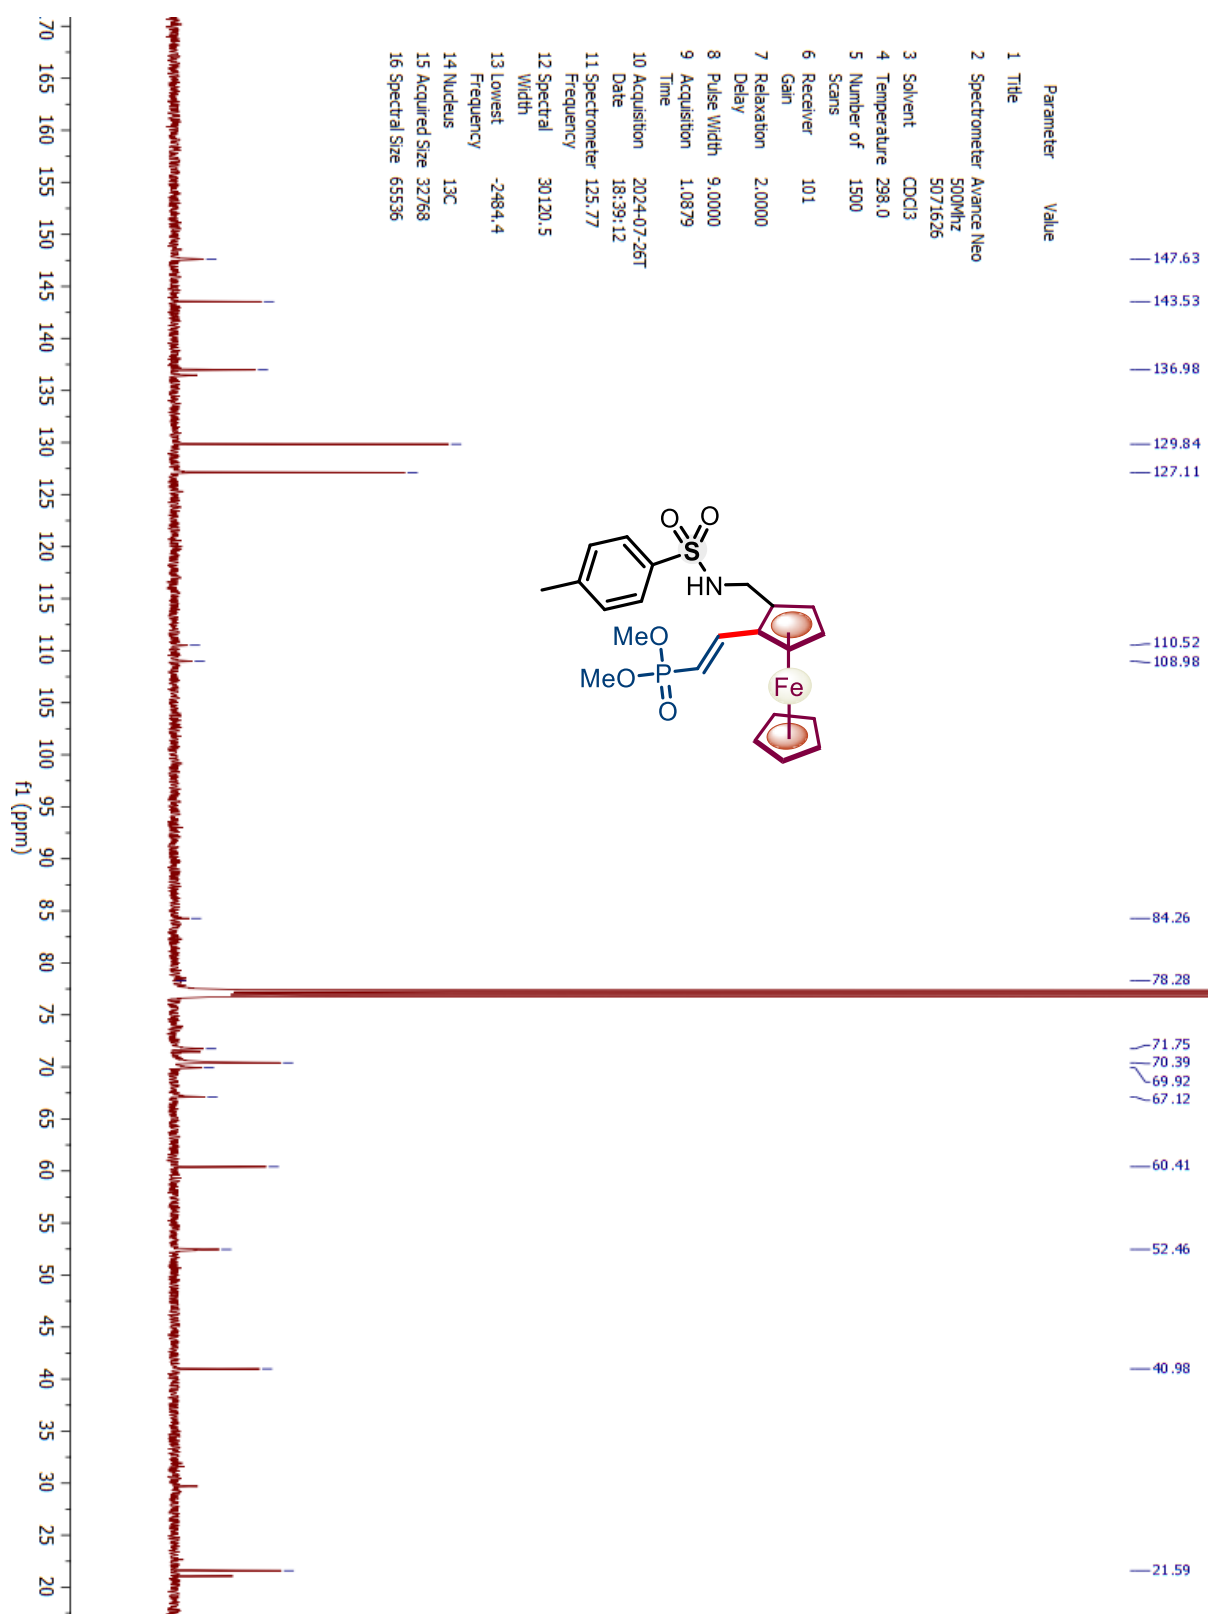

# <sup>31</sup>P NMR Spectrum of 4j

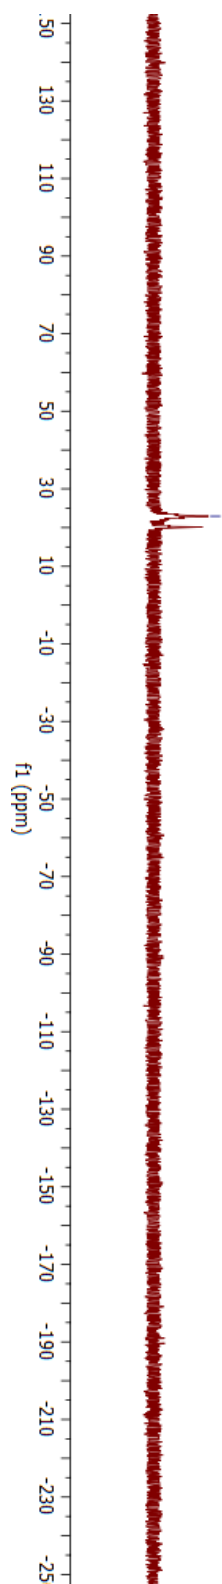

| Parameter                 | Value               |
|---------------------------|---------------------|
| 1 Title                   |                     |
| 2 Spectrometer            | Avance Neo          |
|                           | 500Mhz              |
|                           | 5071626             |
| 3 Solvent                 | CDCl3               |
| 4 Temperature             | 298.1               |
| 5 Number of Scans         | 16                  |
| 6 Receiver Gain           | 101                 |
| 7 Relaxation Delay        | 2.0000              |
| 8 Pulse Width             | 12.0000             |
| 9 Acquisition Time        | 0.3998              |
| 10 Acquisition Date       | 2024-07-26T17:08:16 |
| 11 Spectrometer Frequency | 202.45              |
| 12 Spectral Width         | 81967.2             |
| 13 Lowest Frequency       | -51106.5            |
| 14 Nucleus                | 31P                 |
| 15 Acquired Size          | 32768               |
| 16 Spectral Size          | 65536               |

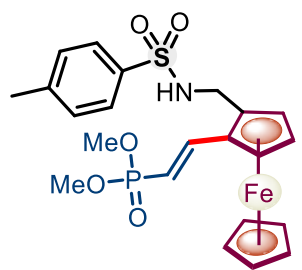

— 22.92

# <sup>1</sup>H NMR Spectrum of 4m

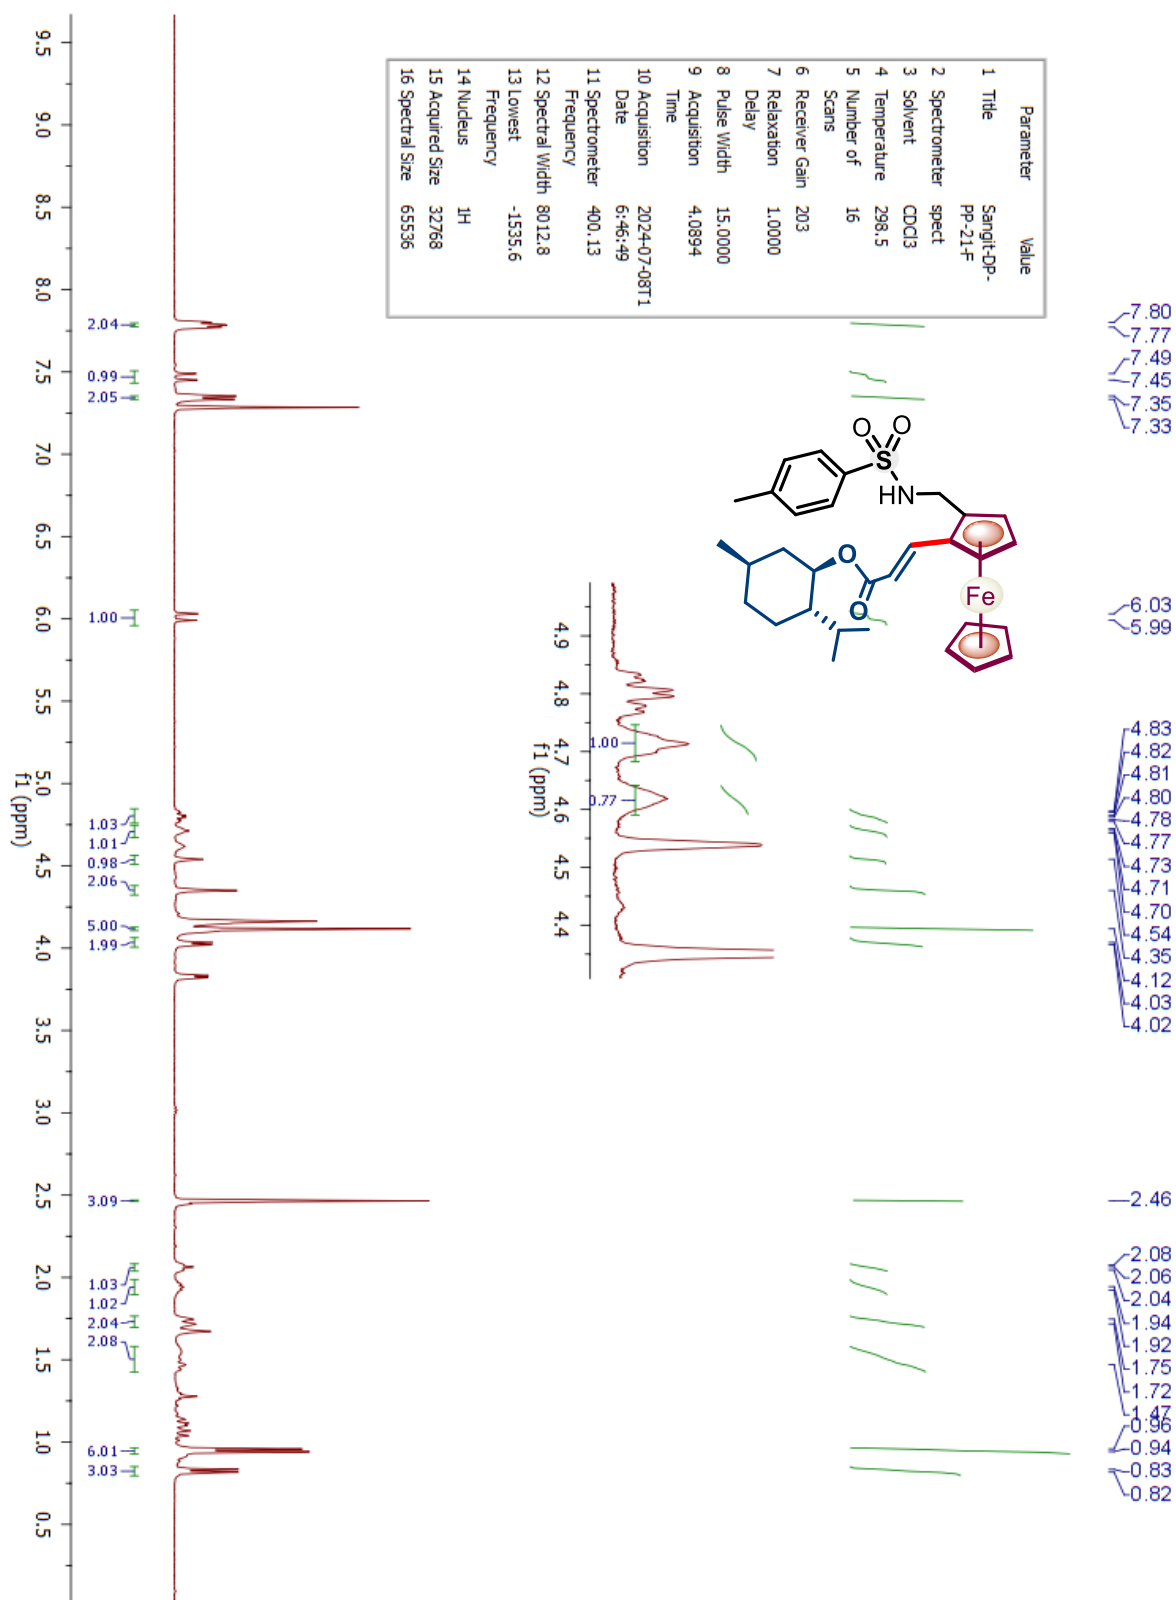

$^{13}\text{C}\{^1\text{H}\}$  NMR Spectrum of **4m**

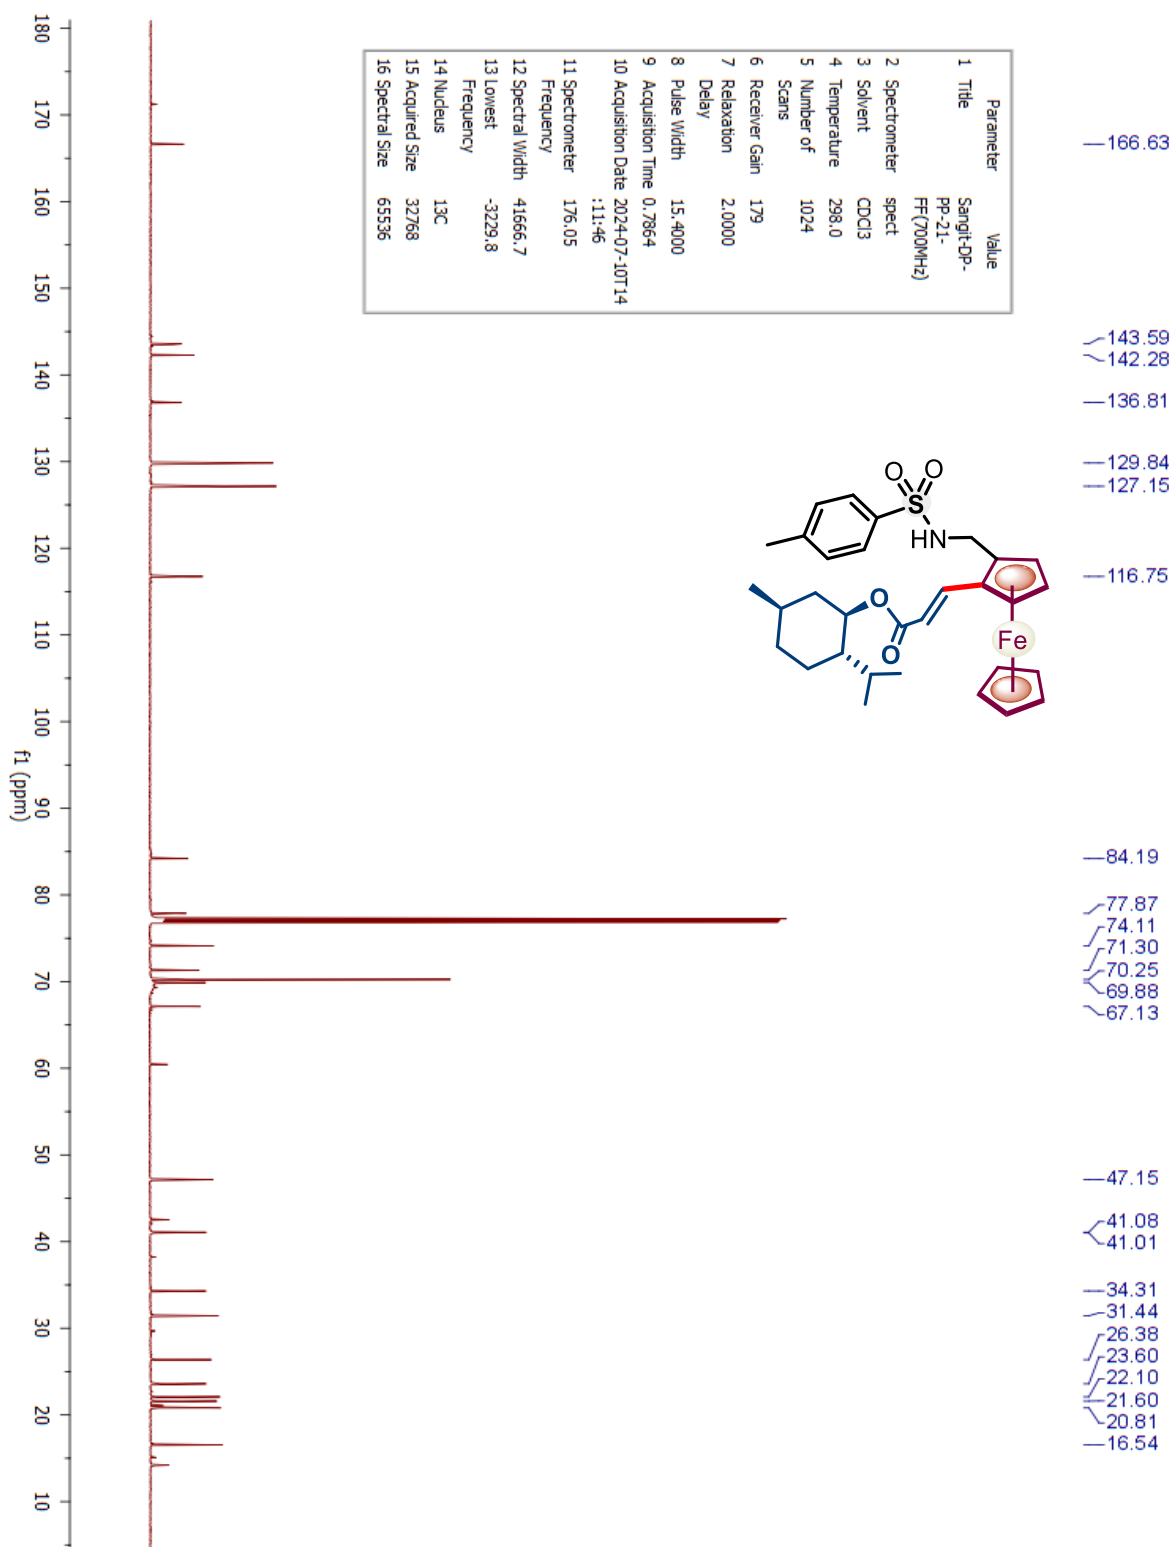



<sup>1</sup>H NMR Spectrum of **4n**

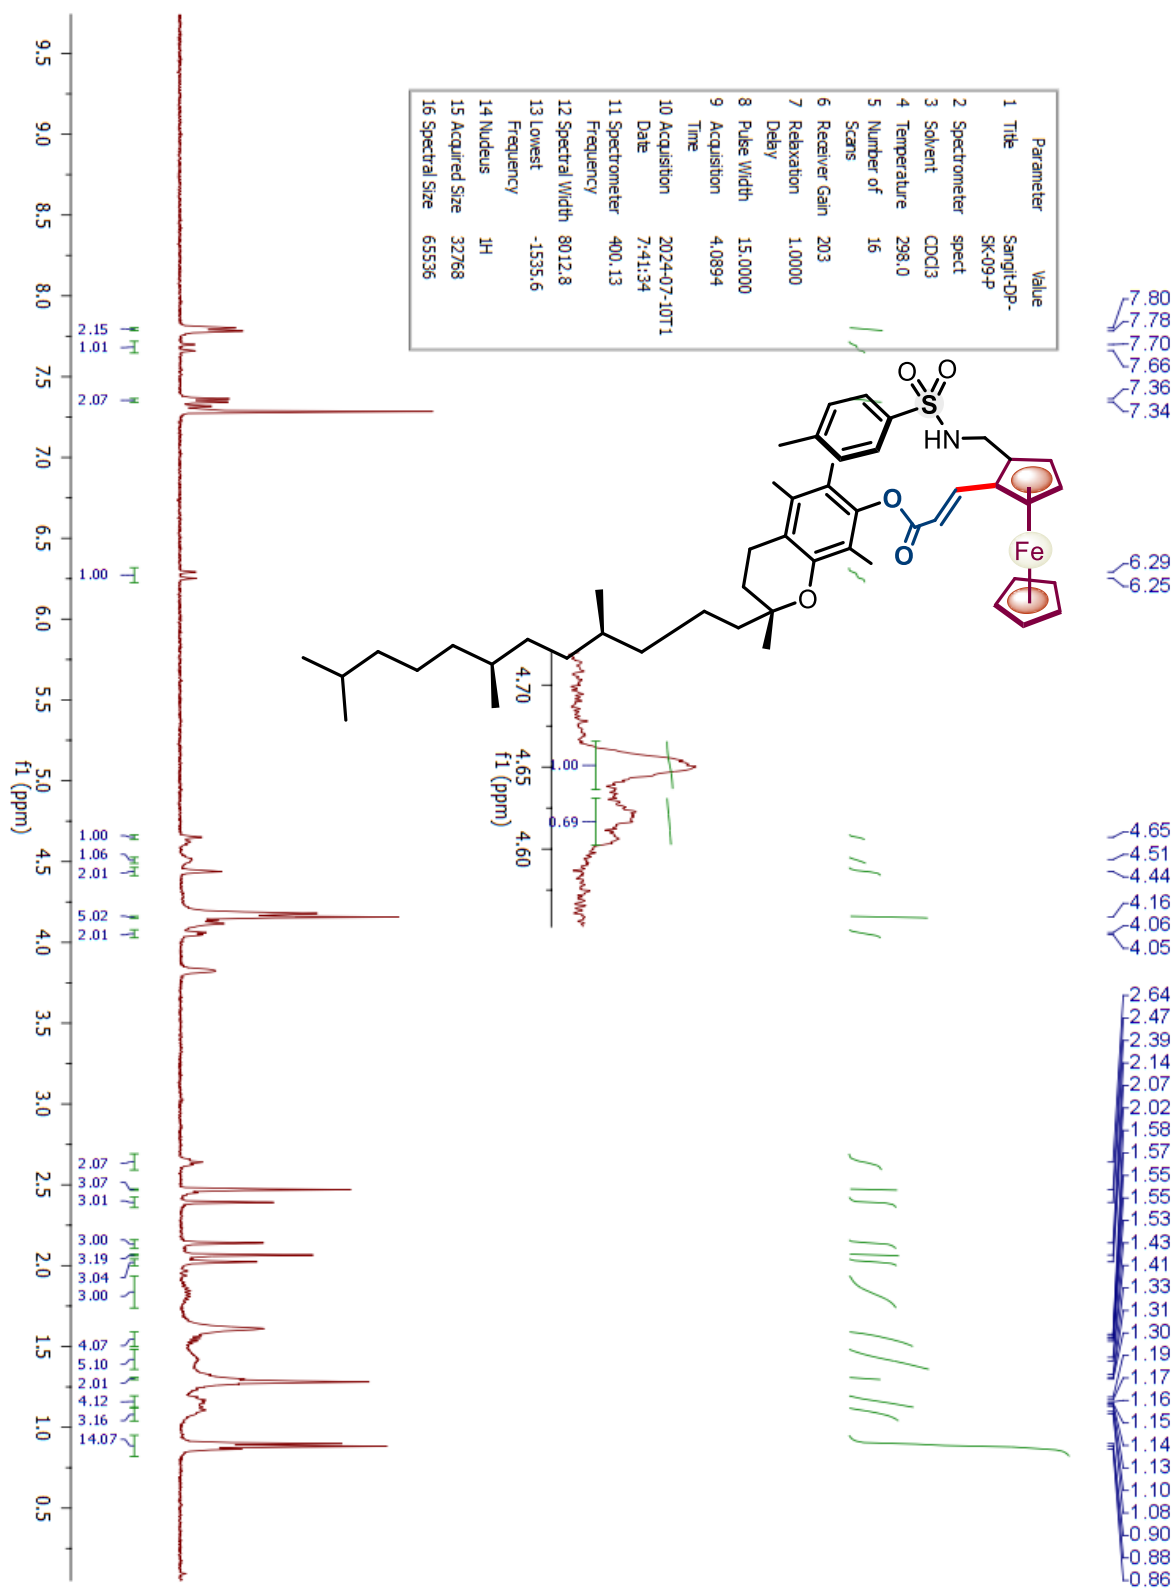

$^{13}\text{C}\{^1\text{H}\}$  NMR Spectrum of **4n**

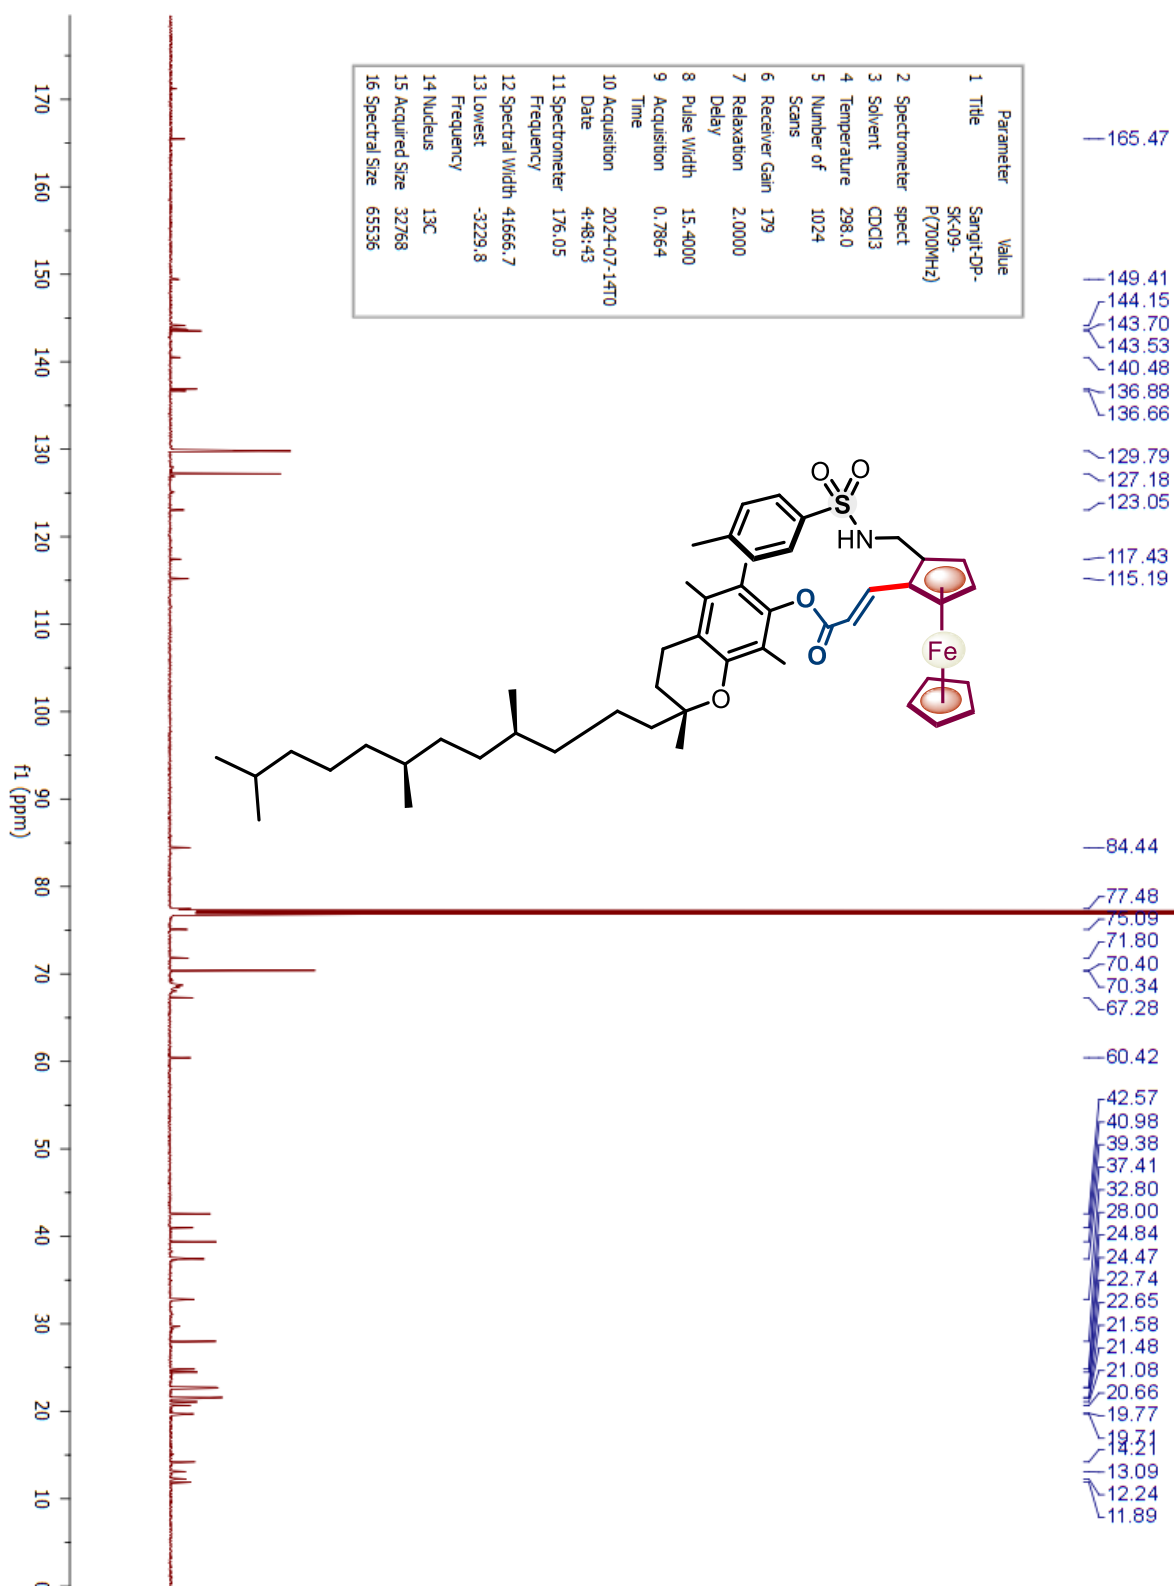

# <sup>1</sup>H NMR Spectrum of 5a

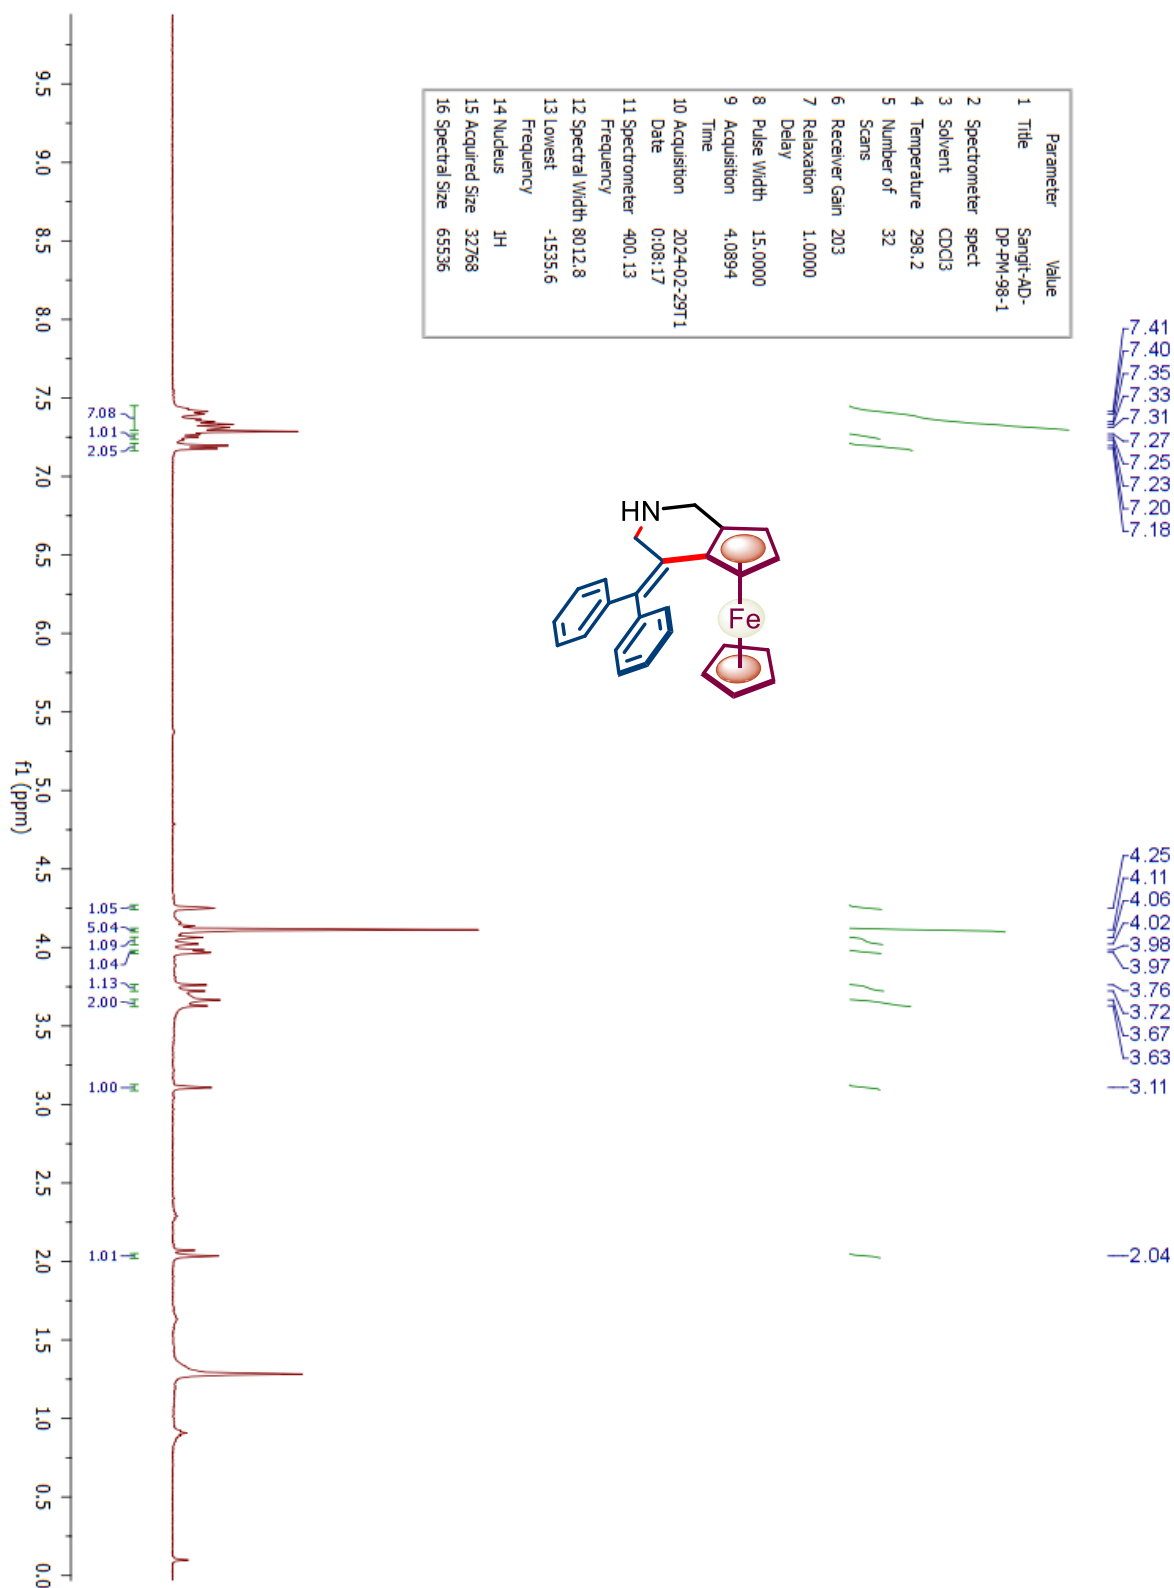

# $^{13}\text{C}\{^1\text{H}\}$ NMR Spectrum of **5a**

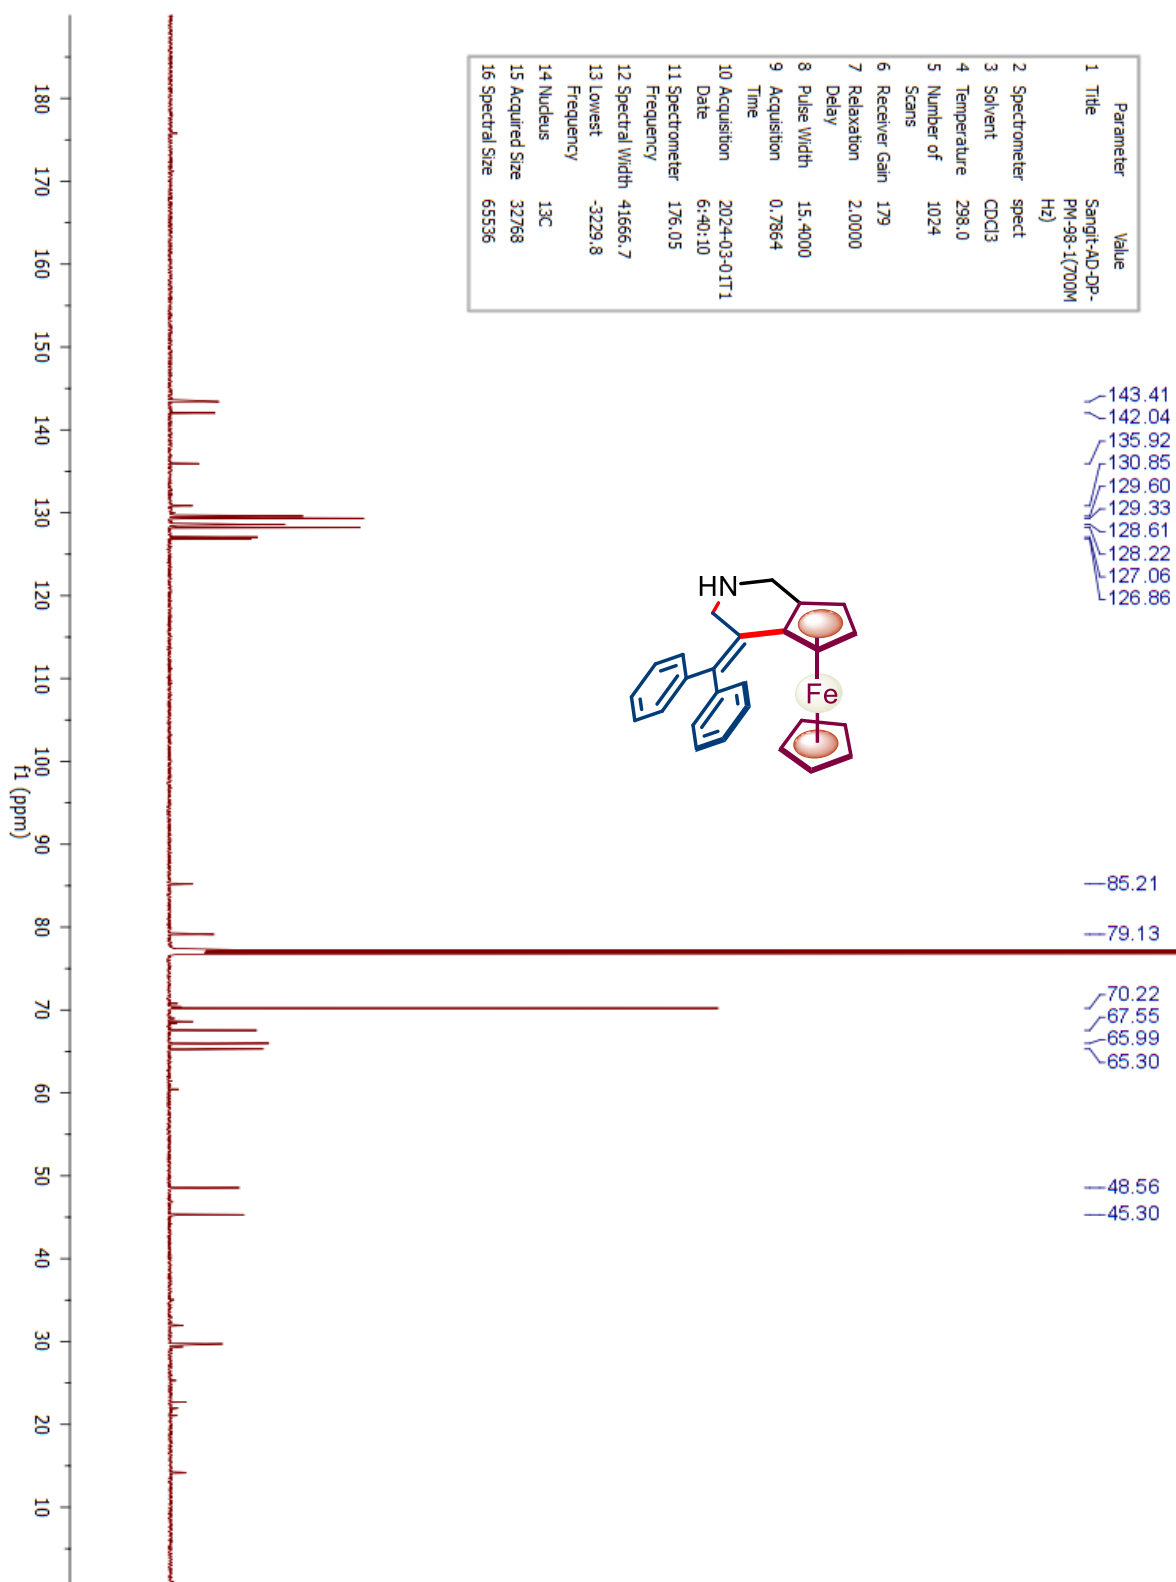

<sup>1</sup>H NMR Spectrum of **6a**

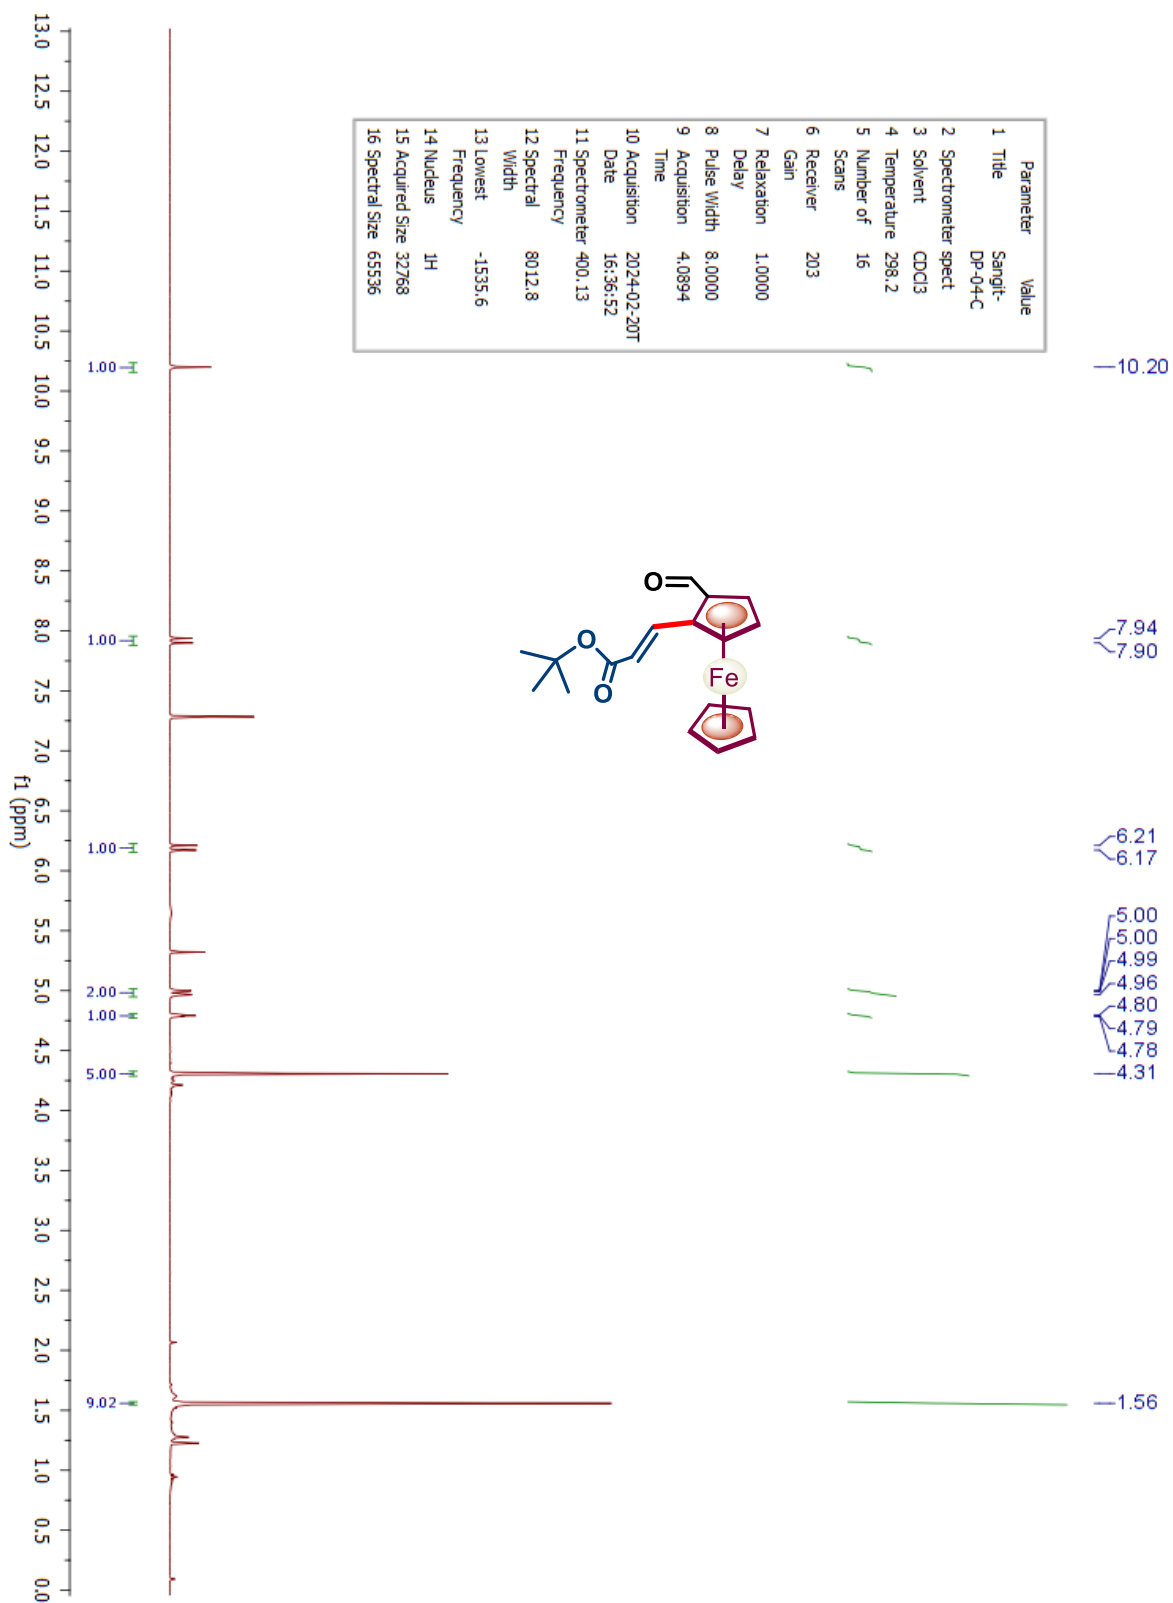

# $^{13}\text{C}\{^1\text{H}\}$ NMR Spectrum of **6a**

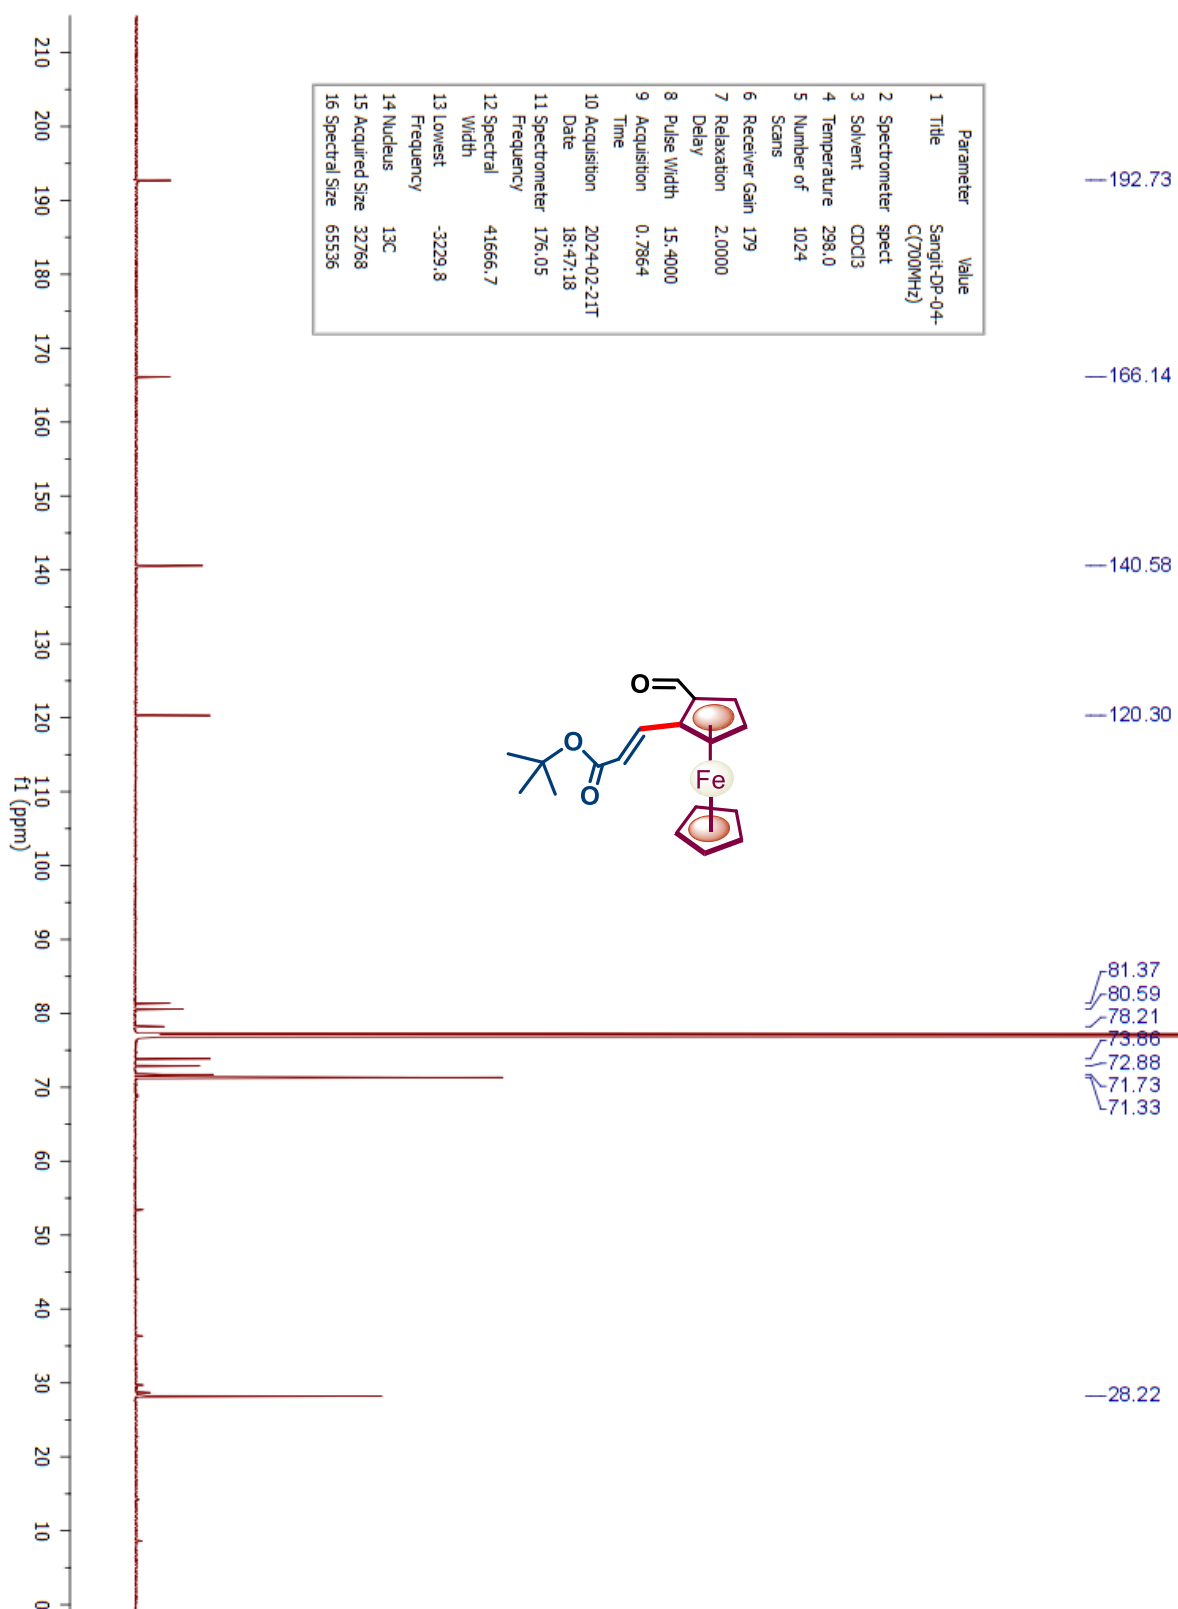

| Parameter                 | Value                  |
|---------------------------|------------------------|
| 1 Title                   | Sangit-DP-04-C(700MHz) |
| 2 Spectrometer            | spect                  |
| 3 Solvent                 | CDCl3                  |
| 4 Temperature             | 298.0                  |
| 5 Number of Scans         | 1024                   |
| 6 Receiver Gain           | 179                    |
| 7 Relaxation Delay        | 2.0000                 |
| 8 Pulse Width             | 15.4000                |
| 9 Acquisition Time        | 0.7864                 |
| 10 Acquisition Date       | 2024-02-21T18:47:18    |
| 11 Spectrometer Frequency | 176.05                 |
| 12 Spectral Width         | 41666.7                |
| 13 Lowest Frequency       | -3229.8                |
| 14 Nucleus                | $^{13}\text{C}$        |
| 15 Acquired Size          | 32768                  |
| 16 Spectral Size          | 65536                  |

<sup>1</sup>H NMR Spectrum of **7a**

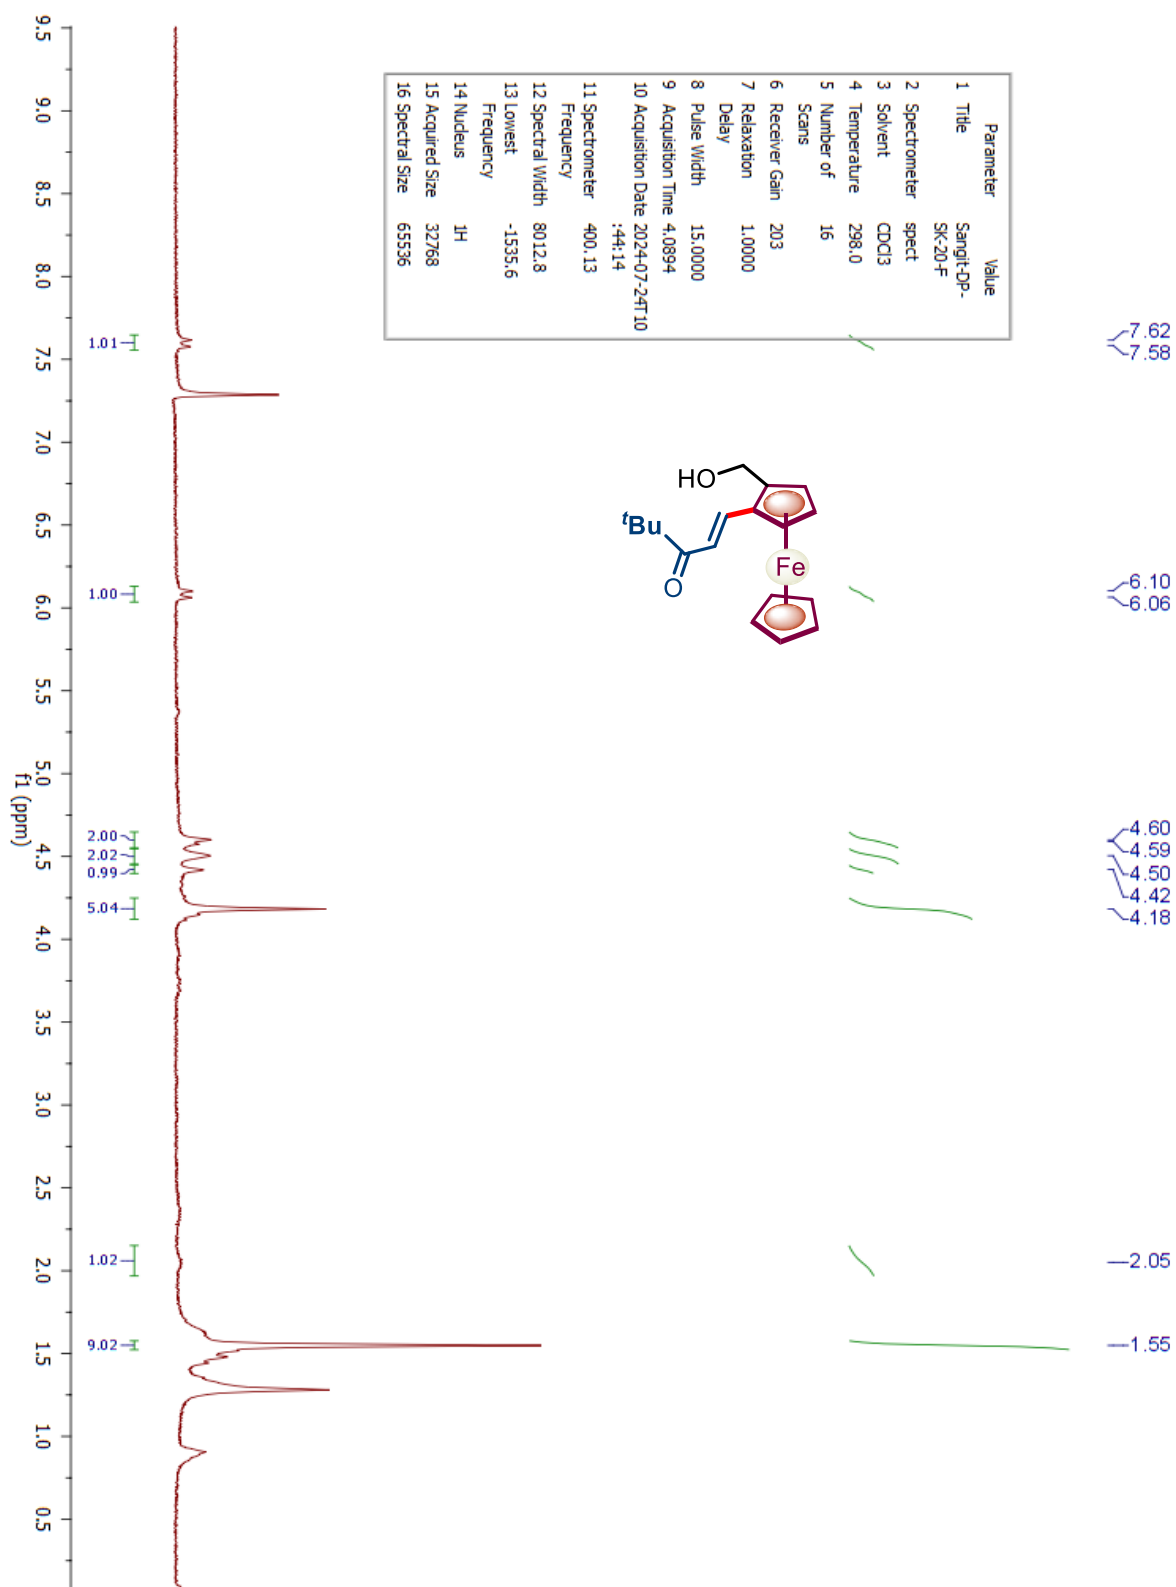

# $^{13}\text{C}\{^1\text{H}\}$ NMR Spectrum of **7a**

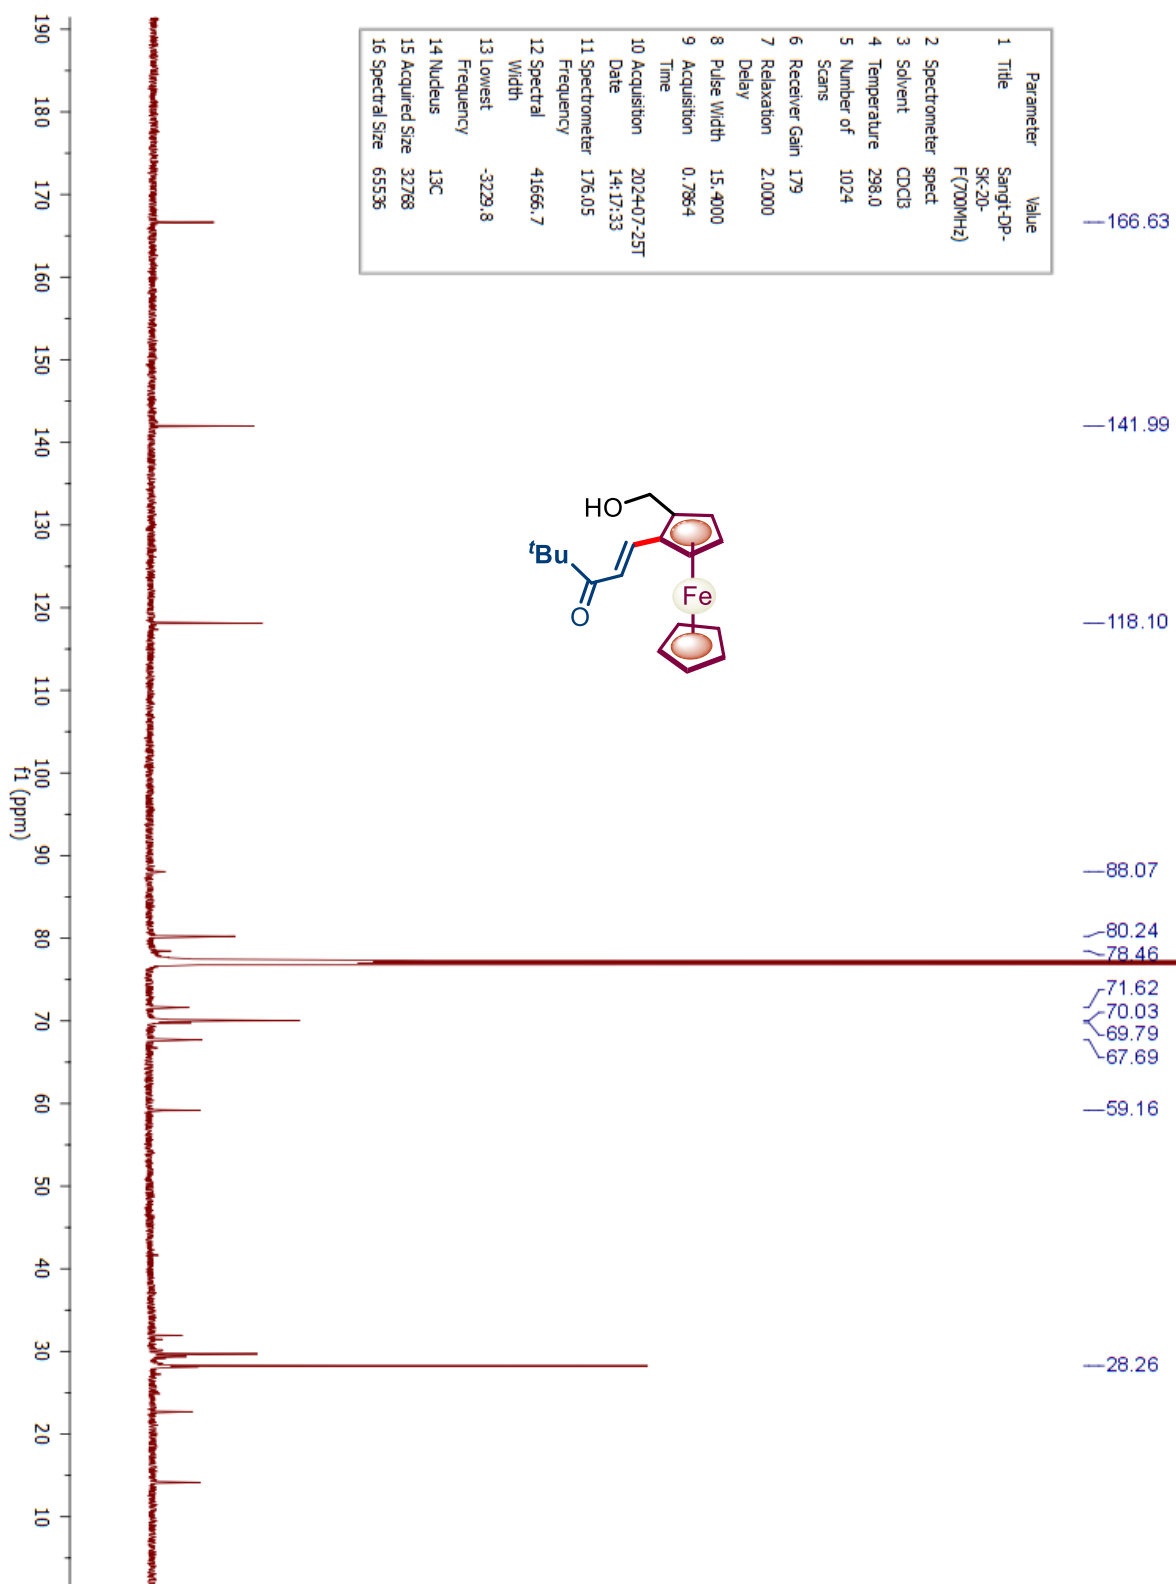

| Parameter                 | Value                     |
|---------------------------|---------------------------|
| 1 Title                   | Sangit-DP-SK-20-F(700MHz) |
| 2 Spectrometer            | spect                     |
| 3 Solvent                 | CDCl3                     |
| 4 Temperature             | 298.0                     |
| 5 Number of Scans         | 1024                      |
| 6 Receiver Gain           | 179                       |
| 7 Relaxation Delay        | 2.0000                    |
| 8 Pulse Width             | 15.4000                   |
| 9 Acquisition Time        | 0.7864                    |
| 10 Acquisition Date       | 2024-07-25T14:17:33       |
| 11 Spectrometer Frequency | 176.05                    |
| 12 Spectral Width         | 41666.7                   |
| 13 Lowest Frequency       | -3229.8                   |
| 14 Nucleus                | $^{13}\text{C}$           |
| 15 Acquired Size          | 32768                     |
| 16 Spectral Size          | 65536                     |



## Mass spectrum of the reaction with alkyne coupling partner

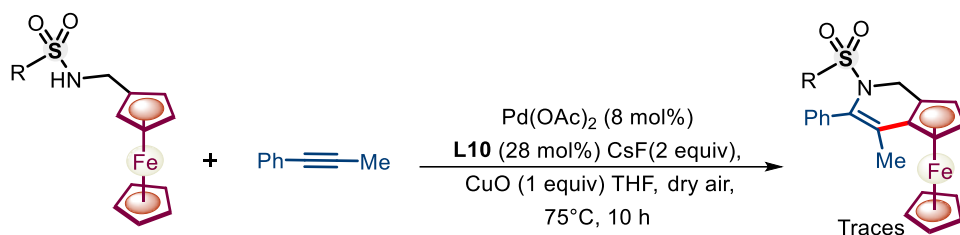

### Display Report

#### Analysis Info

|               |                                                            |                  |                     |
|---------------|------------------------------------------------------------|------------------|---------------------|
| Analysis Name | D:\Data\USER DATA 2023\Oct 23\12-oct\Dr.S.Kumar-DP-18-BF.d | Acquisition Date | 12-10-2023 15:52:27 |
| Method        | tune_wide_APCI_23.06.m                                     | Operator         | Bruker              |
| Sample Name   | DP-18-BF                                                   | Instrument       | micrOTOF-Q 10330    |
| Comment       |                                                            |                  |                     |

#### Acquisition Parameter

|             |            |                       |           |                  |           |
|-------------|------------|-----------------------|-----------|------------------|-----------|
| Source Type | Multi Mode | Ion Polarity          | Positive  | Set Nebulizer    | 2.0 Bar   |
| Focus       | Not active | Set Capillary         | 2500 V    | Set Dry Heater   | 200 °C    |
| Scan Begin  | 50 m/z     | Set End Plate Offset  | -500 V    | Set Dry Gas      | 5.0 l/min |
| Scan End    | 3000 m/z   | Set Collision Cell RF | 600.0 Vpp | Set Divert Valve | Waste     |

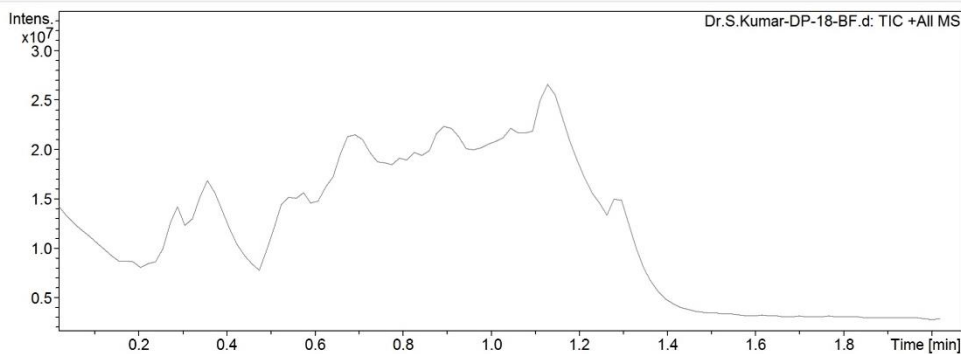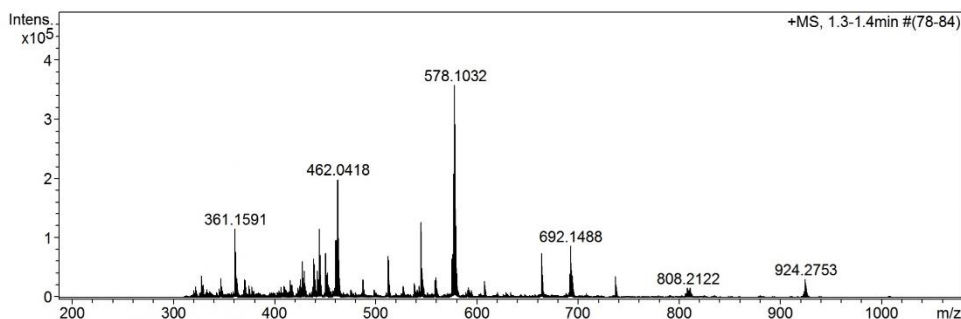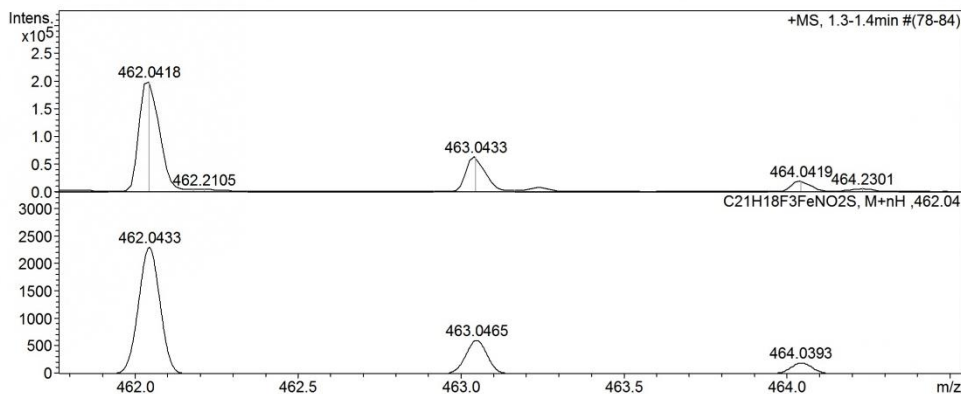

## References

- (1) Z. Zhao, L. Racicot, and G. K. Murphy, *Angew. Chem. Int. Ed.*, 2017, **56**, 11620-11623.
- (2) Q. Xiao, Q. He, J. Li, and J. Wang, *Org. Lett.*, 2015, **17**, 6090-6093.
- (3) R. A. Arthurs, M. Ismail, C. C. Prior, V. S. Oganessian, P. N. Horton, S. J. Coles, and C. J. Richards, *Chem. Eur. J.*, 2016, **22**, 4802–4806.
- (4) (a) B. -F. Shi, N. Maugel, Y. H. Zhang, and J. -Q. Yu, *Angew. Chem. Int. Ed.*, 2008, **47**, 4882–4886. (b) J.-M. Gonzalez, X. Vidal, M.-A. Ortunno, J.-L. Mascarennas, and M. Gulias, *J. Am. Chem. Soc.*, 2022, **144**, 21437–21442.
- (5) L. Dai, S. X. Wang, and F. E. Chen, *Adv. Synth. Catal.* 2010, **352**, 2137 – 2141.
